# Supplementary material for: DHODH inhibition enhances the efficacy of immune checkpoint blockade by increasing cancer cell antigen presentation
Source: eLife. 2024 Jul 8;12:RP87292. doi: 10.7554/eLife.87292 (PMC11230627; doi:10.7554/eLife.87292)
Supplement: Figure 1—source data 1. [file elife-87292-fig1-data1.xlsx]

## Sheet: Figure 1B-D RNAseq full dataset
gene_id	SymbolID	transcript_id(s)	CF_Control_FPKM	CF_250nM_16hr_FPKM	CF_250nM_2wk_FPKM	CF_500nM_16hr_FPKM	CF_500nM_2wk_FPKM	S2_Control_FPKM	S2_0.5uM_16hr_FPKM	S2_0.5uM_2wk_FPKM	S2_25uM_16hr_FPKM	S2_25uM_2wk_FPKM	Gene name
2512	FTL	NM_000146	3142.98	4011.47	3397.74	4281.3	4773.53	2470.71	2519.78	2876.34	3084.48	2915.45	ferritin light chain
2495	FTH1	NM_002032	2937.16	3890.78	4374.32	4205.63	5599.67	3738.16	2756.02	4836.79	3181.61	4906.74	ferritin heavy chain 1
2597	GAPDH	NM_001256799,NM_001289745,NM_001289746,NM_001357938,NM_001357943,NM_001357944,NM_002046	3945.05	3714.1	3257.33	3856.03	2666.91	6576.64	6488.32	6132.33	6941.46	5991.37	glyceraldehyde-3-phosphate dehydrogenase
6187	RPS2	NM_002952	3487.59	3436.9	2379.22	3474.42	1775.53	2637.19	3279.46	2976.71	3529.69	2818.18	ribosomal protein S2
6232	RPS27	NM_001030,NM_001349946,NM_001349947	3505.55	3352.63	2877.17	3900.4	2588	2305.13	2396.26	2540.36	2956.49	2635.36	ribosomal protein S27
6143	RPL19	NM_000981,NM_001330200	3186.87	2969.23	2249.31	3169.37	1974.41	1764.89	1891.48	1745.83	1985.47	1748.59	ribosomal protein L19
60	ACTB	NM_001101	3521.22	2771.01	2685.29	2732.47	2069.13	3153.48	3262	3195.4	3080.8	3122.48	actin beta
6155	RPL27	NM_000988,NM_001349921,NM_001349922	2415.01	2435.02	2072.47	2487.31	1631.35	1423.87	1549.8	1488.07	1799.22	1529.44	ribosomal protein L27
302	ANXA2	NM_001002857,NM_001002858,NM_001136015,NM_004039	2743.61	2428.46	1876.52	2592.99	1502.63	1245.26	1493	1218.97	1615.45	1232.37	annexin A2
1915	EEF1A1	NM_001402	2400.79	2426.75	2086.31	2349.31	1672.47	3164.05	3439.36	3166.69	3774.08	3290.8	eukaryotic translation elongation factor 1 alpha 1
6277	S100A6	NM_014624	1823.92	2318.99	2526.44	2615.01	2915.03	1207.95	621.56	1335.33	759.03	1349.66	S100 calcium binding protein A6
9349	RPL23	NM_000978	2576.95	2151.99	1782.94	1785.61	1415.78	1427.55	1648.08	1441.69	1715.96	1415.76	ribosomal protein L23
10376	TUBA1B	NM_006082	2160.86	2064.41	1648.42	2252.92	1134.71	2456.01	2862.09	2726.89	3211.97	2614.36	tubulin alpha 1b
4502	MT2A	NM_005953	1863.65	2013.14	2791.62	2100.57	2114.18	3933.35	5883.32	3784.69	5378.85	3968	metallothionein 2A
5757	PTMA	NM_001099285,NM_002823	2318.65	1996.94	1891.54	2180.78	1289.3	1455.65	1780.29	1592.39	1947.11	1502.04	prothymosin, alpha
1072	CFL1	NM_005507	1736.51	1959.82	1809.65	2100	1619.23	1980.71	2243.75	2039.01	2429.25	2095.46	cofilin 1
6176	RPLP1	NM_001003,NM_213725	1844.07	1949.75	1701.39	1995.56	1437.66	2166.6	2341.54	2084.22	2487.45	2057.55	ribosomal protein lateral stalk subunit P1
6171	RPL41	NM_001035267,NM_021104	2018.47	1943.82	2045.26	1847.11	1618.53	4057.04	3633.58	3442.96	4019.29	3488.38	ribosomal protein L41
10399	RACK1	NM_006098	1905.31	1941.1	1680.81	1914.13	1246.05	1447.25	1551.37	1417.87	1615.96	1451.46	receptor for activated C kinase 1
6175	RPLP0	NM_001002,NM_053275	2077.13	1937.75	1502.07	1955.41	1129.81	1653.55	1856.18	1657.03	1963.84	1670.83	ribosomal protein lateral stalk subunit P0
4869	NPM1	NM_001037738,NM_001355006,NM_001355007,NM_001355009,NM_001355010,NM_002520,NM_199185	2400.58	1782.85	1297.26	1846.12	842.63	1369.93	1555.31	1307.69	1587.03	1290.76	nucleophosmin 1
9168	TMSB10	NM_021103	1486.21	1749.67	1774.25	1690.42	1714.96	1230.02	1332.54	1172.11	1497.98	1231.94	thymosin beta 10
2023	ENO1	NM_001201483,NM_001353346,NM_001428	1740.48	1703.7	1511.05	1738.13	1253.46	1816.07	1917.4	1858.27	2013.12	1817.36	enolase 1
23521	RPL13A	NM_001270491,NM_012423	1556.23	1670.88	1303.17	1554.78	990.63	1188.53	1393.28	1172.91	1458.23	1196.54	ribosomal protein L13a
6282	S100A11	NM_005620	1526.51	1654.06	1834.81	1788.47	2234.6	1008.72	857.04	1033.31	983.93	1061.05	S100 calcium binding protein A11
6208	RPS14	NM_001025070,NM_001025071,NM_005617	1710.87	1634.08	1360.34	1693.59	1093.41	1576.55	1661.98	1471.39	1750.09	1467.09	ribosomal protein S14
5315	PKM	NM_001206796,NM_001206797,NM_001206798,NM_001206799,NM_001316318,NM_002654,NM_182470,NM_182471	1449.15	1604.1	1542.49	1654.44	1427.31	1186.19	1314.36	1285.36	1449.88	1240.53	pyruvate kinase M1/2
6205	RPS11	NM_001015	1541.27	1603.91	1483.71	1656.73	1275.14	1251.38	1307.97	1234.16	1426.27	1290.72	ribosomal protein S11
7114	TMSB4X	NM_021109	1504.11	1593.44	2106.03	1644.47	2054.06	3189.73	3414.65	3752.88	3924.31	3611.43	thymosin beta 4, X-linked
6124	RPL4	NM_000968	1677.85	1569.21	1281.61	1519.75	939.5	1776.02	2050.13	1844.34	2193.47	1854.25	ribosomal protein L4
3856	KRT8	NM_001256282,NM_001256293,NM_002273	2077.68	1562.99	864.8	1542.67	655.84	1372.37	1943.4	1329.93	1946.84	1233.65	keratin 8
7431	VIM	NM_003380	1606.5	1558.01	1683.84	1558.51	1714.79	2087.96	1902.93	2239.85	2075.59	2296.23	vimentin
6222	RPS18	NM_022551	1565.91	1555.47	1368.67	1664.11	1158.8	1972.66	2180.64	2006.66	2484.76	2024.81	ribosomal protein S18
6230	RPS25	NM_001028	1442.1	1552.82	1261.28	1597.35	1067.28	2069.31	2229.04	2125.24	2509.61	2089.09	ribosomal protein S25
6235	RPS29	NM_001030001,NM_001032,NM_001351375	1301.76	1450.43	1197.34	1518.11	1006.7	709.25	675.73	649.28	835.6	593.69	ribosomal protein S29
6142	RPL18A	NM_000980	1319.62	1375	1094.37	1305.65	890.3	1157.24	1258.54	1108.34	1266.55	1112.94	ribosomal protein L18a
6135	RPL11	NM_000975,NM_001199802	1426.18	1357.35	1071.15	1419.74	977.7	860.78	955.02	899.39	1115.19	874.94	ribosomal protein L11
6210	RPS15A	NM_001019,NM_001030009	1359.49	1355.47	1086.5	1455.72	949.67	1658.27	1861.98	1639.48	2230.13	1608.88	ribosomal protein S15a
203068	TUBB	NM_001293212,NM_001293213,NM_001293214,NM_001293215,NM_001293216,NM_178014	1298.77	1316.68	1165.08	1325.8	836.15	1222.44	1278.39	1224.6	1214.03	1132.21	tubulin beta class I
6202	RPS8	NM_001012	1338	1301.37	981.31	1400.85	731.63	1417.88	1515.5	1415.73	1572.25	1424.45	ribosomal protein S8
6194	RPS6	NM_001010	1410.82	1296.53	1017.76	1370.27	723.89	3138.43	3309.92	3091.83	3701.38	3097.83	ribosomal protein S6
3159	HMGA1	NM_001319077,NM_001319078,NM_001319079,NM_001319080,NM_001319081,NM_001319082,NM_002131,NM_145899,NM_145901,NM_145902,NM_145903,NM_145905	1139.4	1285.21	1208.26	1258.34	1095.14	1336.08	1473.75	1272.18	1404.39	1408.01	high mobility group AT-hook 1
6132	RPL8	NM_000973,NM_001317771,NM_001317782,NM_033301	1323.1	1283.95	1001.99	1255.53	770.32	1726.01	1916.8	1717.87	2027.07	1693.84	ribosomal protein L8
1937	EEF1G	NM_001404	1293.36	1274.11	1051.07	1310.09	793.39	1165.73	1282.01	1155.56	1379.31	1178.48	eukaryotic translation elongation factor 1 gamma
4831	NME2	NM_001018137,NM_001018138,NM_001018139,NM_001198682,NM_002512	1104.45	1260.78	1005.7	1290.34	747.62	737.08	848.31	830.91	964.75	840.87	NME/NM23 nucleoside diphosphate kinase 2
6128	RPL6	NM_000970,NM_001024662,NM_001320137,NM_001320138,NM_001320139,NM_001320140,NM_001320141,NM_001320142	1392.72	1259.02	1092.83	1257.98	828.76	1225.06	1322.49	1247.43	1460.45	1268.88	ribosomal protein L6
11224	RPL35	NM_007209	1267.52	1241.94	1043.36	1266.05	792.4	1485.26	1650.39	1558.52	1866.94	1578.59	ribosomal protein L35
6229	RPS24	NM_001026,NM_001142282,NM_001142283,NM_001142284,NM_001142285,NM_033022	1370.94	1233.38	1119.63	1370.34	863.93	1422.47	1640.57	1420.18	1963.2	1388.11	ribosomal protein S24
6136	RPL12	NM_000976	1222.96	1203.92	965.83	1279.26	704.23	1097.14	1279	1200.92	1399.43	1197.34	ribosomal protein L12
6191	RPS4X	NM_001007	1138.02	1203.8	928.42	1298.21	714.78	1501.35	1658.25	1505.71	1915.12	1566.11	ribosomal protein S4, X-linked
3320	HSP90AA1	NM_001017963,NM_005348	1277.83	1183.55	1001.42	1254.08	756.58	1100.47	1463.24	1290.47	1712.98	1236.18	heat shock protein 90 alpha family class A member 1
3875	KRT18	NM_000224,NM_199187	1610.44	1154.77	758.97	1099.26	533.53	1235.42	1724.82	1157.59	1731.82	1075.2	keratin 18
6168	RPL37A	NM_000998	1192.51	1124.92	935.73	1162.19	826.21	1144.22	1158.86	1029.23	1316.74	997.97	ribosomal protein L37a
6218	RPS17	NM_001021	1141.59	1113.18	946.59	1223.09	700.38	1255.72	1363.84	1251.6	1618.09	1256.73	ribosomal protein S17
3934	LCN2	NM_005564	875.49	1111.11	1620.69	1080.05	2171.09	10.39	11.25	13.41	11.57	13.88	lipocalin 2
6129	RPL7	NM_000971	1186.7	1107.2	829.2	1101.97	611.23	1301.73	1379.21	1280.03	1670.47	1256.97	ribosomal protein L7
567	B2M	NM_004048	800.98	1082.26	2343.02	1255.87	3881.51	772.8	741.85	970.54	1049.14	1044.58	beta-2-microglobulin
226	ALDOA	NM_000034,NM_001127617,NM_001243177,NM_001355562,NM_001355563,NM_001355564,NM_001355565,NM_184041,NM_184043	978.72	1079.66	953.74	1110.16	876.14	1090.73	1222.03	1140.34	1299.37	1116.42	aldolase, fructose-bisphosphate A
6281	S100A10	NM_002966	1051.35	1078.65	976.48	1189.19	826.53	417.23	439.86	435.97	497.58	449.03	S100 calcium binding protein A10
6189	RPS3A	NM_001006,NM_001267699	1218.9	1060.02	804.62	1149.19	590.1	1106.98	1230.57	1065.96	1411.35	1052.44	ribosomal protein S3A
6193	RPS5	NM_001009	995.96	1035.69	913.94	989.04	703.98	442.67	503.19	436.83	570.39	456.49	ribosomal protein S5
6156	RPL30	NM_000989	1016.75	1017.16	892.76	1103.06	737.22	1282.81	1318.78	1326.86	1673.01	1319.7	ribosomal protein L30
6204	RPS10	NM_001014,NM_001203245,NM_001204091	1003.93	977.07	811.8	952.49	611.17	1231.08	1370.08	1240.16	1409.02	1230.46	ribosomal protein S10
4316	MMP7	NM_002423	446.44	976.8	1128.94	1062.39	1402.82	57.4	27.8	41.93	27.6	52.55	matrix metallopeptidase 7
6133	RPL9	NM_000661,NM_001024921	1058.33	976.41	731.88	1045.93	593.45	1298.66	1432.51	1300.69	1583.7	1308.71	ribosomal protein L9
6122	RPL3	NM_000967,NM_001033853	984.47	971.45	818.52	926.74	548.45	889.43	993.36	870.97	1025.09	860.49	ribosomal protein L3
6188	RPS3	NM_001005,NM_001256802,NM_001260506,NM_001260507	954.79	967.73	720.62	912.61	530.47	1158.94	1354.83	1198.06	1615.98	1222.57	ribosomal protein S3
6152	RPL24	NM_000986	1115.49	963.09	870.34	945.69	729.99	1033.33	1049.76	1016.4	1221.94	1019.17	ribosomal protein L24
6223	RPS19	NM_001022,NM_001321483,NM_001321484,NM_001321485	984.69	963.06	802.05	1052.31	694.71	772.49	848.83	785	917.21	775.42	ribosomal protein S19
6227	RPS21	NM_001024	897.75	956.19	720.43	967.18	559.02	1120.5	1217.5	1061.48	1426.38	1058.98	ribosomal protein S21
6165	RPL35A	NM_000996,NM_001316311	1050.55	955.79	834.4	1029.32	705.91	947.36	1032.94	997.62	1162.59	976.87	ribosomal protein L35a
3921	RPSA	NM_001304288,NM_002295	846.98	948.84	662.11	969.51	454.98	915.99	1088.67	1074.76	1222.24	1135.53	ribosomal protein SA
6170	RPL39	NM_001000	908.93	933.32	938.48	1005.72	806.57	1289.57	1378.72	1240.13	1714.89	1237.55	ribosomal protein L39
71	ACTG1	NM_001199954,NM_001614	1555.11	921.44	1051.59	852.48	914.4	1894.5	2003.59	2079.77	2062.06	2046.46	actin gamma 1
6201	RPS7	NM_001011	977.66	920.82	713.53	964.52	574.1	1212.35	1198.61	1121.37	1441.01	1129.67	ribosomal protein S7
689	BTF3	NM_001037637,NM_001207	982.13	912.66	796.04	1019.59	612.36	860.43	947.18	882.78	1137.77	883.85	basic transcription factor 3
6141	RPL18	NM_000979,NM_001270490	915.09	911	770.64	872.82	669.78	653.99	704.49	630.16	713.37	634.98	ribosomal protein L18
6160	RPL31	NM_000993,NM_001098577,NM_001099693	858.36	897.35	728.35	945.21	602	834.18	853.88	806.81	1064.87	812.11	ribosomal protein L31
3312	HSPA8	NM_006597,NM_153201	1764.83	896.64	1205.45	670.25	933.64	1771.37	1657.47	1445.7	1275.65	1371.68	heat shock protein family A (Hsp70) member 8
6206	RPS12	NM_001016	919.92	886.18	717.49	884.94	604.45	1306.57	1322.03	1214.51	1585.04	1176.12	ribosomal protein S12
10551	AGR2	NM_006408	927.7	881.61	866.82	930.24	522.61	1.77	2.92	2.52	3.29	2.6	anterior gradient 2, protein disulphide isomerase family member
6181	RPLP2	NM_001004	914.6	880.34	713.54	904.91	626.97	1408.69	1555.1	1396.09	1638.1	1414.66	ribosomal protein lateral stalk subunit P2
4637	MYL6	NM_021019,NM_079423	913.17	873.4	1040.03	1025.21	948.2	1003.32	978.14	1136.21	1241.18	1193.77	myosin light chain 6
2778	GNAS	NM_000516,NM_001077488,NM_001077489,NM_001077490,NM_001309840,NM_001309842,NM_001309861,NM_001309883,NM_016592,NM_080425,NM_080426	677.6	871.17	922.16	955.61	808.8	1055.83	1127.84	1026.28	1288.61	1083.52	GNAS complex locus
5478	PPIA	NM_001300981,NM_021130	799.65	865.92	788.97	964.33	671.63	984.68	1055.35	1024.39	1261.5	979.64	peptidylprolyl isomerase A
8407	TAGLN2	NM_001277223,NM_001277224,NM_003564	880.81	837.24	872.63	912.57	970.38	235.3	255.05	256.64	286.47	278.11	transgelin 2
6139	RPL17	NM_000985,NM_001035006,NM_001199340,NM_001199341,NM_001199342,NM_001199343,NM_001199344,NM_001199345	901.52	831.92	600.72	902.4	531.68	743.78	826.5	797.96	962.81	817.9	ribosomal protein L17
6130	RPL7A	NM_000972	846.85	829.09	636.9	800.66	450.67	1065.43	1164.42	1081.77	1284.4	1081.32	ribosomal protein L7a
5216	PFN1	NM_005022	752.1	825.38	658.39	850.42	581.26	790.09	951.93	790.54	1037.94	821.08	profilin 1
811	CALR	NM_004343	744.61	803.61	803.12	840.58	731.78	597.47	732.26	710.83	726.4	671.34	calreticulin
6224	RPS20	NM_001023,NM_001146227	787.58	801.98	687.95	810.52	575.6	863.84	917.81	908.47	1099.22	894.97	ribosomal protein S20
6234	RPS28	NM_001031	747.69	789.91	584.48	713.2	506.05	945.56	1067.42	1001.17	1005.34	956.54	ribosomal protein S28
6154	RPL26	NM_000987,NM_001315530,NM_001315531	825.41	787.96	619.99	931.95	527.27	1272.72	1423.49	1328.05	1685.81	1380.64	ribosomal protein L26
6217	RPS16	NM_001020,NM_001321111	762.71	784.14	641.84	791.56	523.51	815.55	883.21	782.04	969.36	762.01	ribosomal protein S16
3178	HNRNPA1	NM_002136,NM_031157	913.82	782.8	634.27	739.42	425.54	905.78	893.15	807.38	855.1	777.59	heterogeneous nuclear ribonucleoprotein A1
6144	RPL21	NM_000982	793.62	728.68	607.52	858.59	472.45	925.7	1030.93	1048.93	1313.15	1074.02	ribosomal protein L21
4904	YBX1	NM_004559	676.9	727.05	552.96	828.57	414.38	612.06	713.44	677.28	819.12	697.17	Y-box binding protein 1
5052	PRDX1	NM_001202431,NM_002574,NM_181696,NM_181697	628.01	711.34	518.32	861.28	501.96	778.99	947.18	906.8	1127.66	897.61	peroxiredoxin 1
4736	RPL10A	NM_007104	808.56	705.19	649.04	718.11	466.31	825.66	890.22	786.74	943.32	750.89	ribosomal protein L10a
6125	RPL5	NM_000969	812.14	695.86	553.56	720.85	433.32	763.78	835.9	806.88	993.63	846.53	ribosomal protein L5
3939	LDHA	NM_001135239,NM_001165414,NM_001165415,NM_001165416,NM_005566	684.34	695.11	681.54	756.13	548.48	1744.07	1497	1954.01	1753.67	2059.09	lactate dehydrogenase A
5327	PLAT	NM_000930,NM_001319189,NM_033011	377.75	691.83	622.76	612.22	687.71	15.47	7.24	13.47	7.73	14.75	plasminogen activator, tissue type
7316	UBC	NM_021009	714.26	685.41	730.42	749.72	983.4	609.95	520.13	599.22	439.76	615.34	ubiquitin C
26986	PABPC1	NM_002568	825.44	684.53	574.14	660.46	444.2	729.01	878.86	736.66	891.45	759.78	poly(A) binding protein cytoplasmic 1
3688	ITGB1	NM_002211,NM_033668,NM_133376	651.22	682.31	693.88	734.07	687.12	711.65	707.41	703.01	777.41	731.82	integrin subunit beta 1
6173	RPL36A	NM_001199972,NM_021029	738.55	681.81	578.25	711.86	429.42	924.84	981.04	954.63	1092.36	930.45	ribosomal protein L36a
2950	GSTP1	NM_000852	598.14	658.29	550.14	686.9	504.44	744.62	891.71	796.79	971.81	842.7	glutathione S-transferase pi 1
6203	RPS9	NM_001013,NM_001321701,NM_001321702,NM_001321704,NM_001321705,NM_001321706	689.27	655.19	593.98	622.43	501.58	688.35	731.52	650.53	759.22	665.89	ribosomal protein S9
2197	FAU	NM_001997	602.9	632.51	641.87	666.37	531.85	450.93	488.89	504.09	536.54	488.25	FAU, ubiquitin like and ribosomal protein S30 fusion
7184	HSP90B1	NM_003299	592.76	630.58	661.69	672.03	563.28	392.03	493.72	456.42	563.56	454.32	heat shock protein 90 beta family member 1
6134	RPL10	NM_001256577,NM_001256580,NM_001303624,NM_001303625,NM_001303626,NM_006013	621.87	630.19	561.81	609.51	481.63	790	798.09	703.45	834.49	734.08	ribosomal protein L10
3326	HSP90AB1	NM_001271969,NM_001271970,NM_001271971,NM_001271972,NM_007355	1039.87	629.72	659.57	594.15	541.72	754.34	780.86	652.08	743.24	626.06	heat shock protein 90 alpha family class B member 1
5902	RANBP1	NM_001278639,NM_001278640,NM_001278641,NM_002882	693.41	629.22	499.78	660.84	368.85	372.53	408.02	407.12	438.88	403.11	RAN binding protein 1
10209	EIF1	NM_005801	689.43	625.25	559.29	634.05	606.42	299.97	263.95	265.18	275.75	268.58	eukaryotic translation initiation factor 1
6233	RPS27A	NM_001135592,NM_001177413,NM_002954	617.13	623.95	492.25	644.04	369.24	635.32	620.04	613.89	774.34	582.99	ribosomal protein S27a
25873	RPL36	NM_015414,NM_033643	662.16	622.87	591.59	665.77	547.69	753.48	814.22	711.91	824.29	725.07	ribosomal protein L36
514	ATP5F1E	NM_006886	517.57	622.22	630.27	659.48	549.65	605.43	634.01	610.78	807.24	613.24	ATP synthase F1 subunit epsilon
6159	RPL29	NM_000992	663.29	620.33	560.59	658.78	444.91	699.36	763.84	696.24	840.31	715.32	ribosomal protein L29
1350	COX7C	NM_001867	526.66	596.65	556.66	680.69	428.5	489.62	532.4	507.4	596.88	501	cytochrome c oxidase subunit 7C
84790	TUBA1C	NM_001303114,NM_001303115,NM_001303116,NM_001303117,NM_032704	815.45	591.15	642.33	575.34	487.97	683.84	602.13	617.77	622.43	611.12	tubulin alpha 1c
444	ASPH	NM_001164750,NM_001164751,NM_001164752,NM_001164753,NM_001164754,NM_001164755,NM_001164756,NM_004318,NM_020164,NM_032466,NM_032467,NM_032468	534.85	587.17	520.51	618.38	441.88	133.49	137.46	147.08	156.26	146.71	aspartate beta-hydroxylase
6231	RPS26	NM_001029	625.89	581.93	469.31	569.89	380.76	697.46	684.91	712.57	828.29	733.06	ribosomal protein S26
6209	RPS15	NM_001018,NM_001308226	517.55	570.55	509.68	556.61	414.75	674.08	703.59	667.86	783.74	645.96	ribosomal protein S15
2919	CXCL1	NM_001511	390.72	565.44	548.78	437.67	412.28	1.07	0.44	2.42	1.04	3.62	C-X-C motif chemokine ligand 1
1984	EIF5A	NM_001143760,NM_001143761,NM_001143762,NM_001970	588.77	561.2	452.02	564.23	344.99	673.51	736.89	635.92	739.61	666.19	eukaryotic translation initiation factor 5A
3880	KRT19	NM_002276	614.9	551.55	459.2	488.74	501.63	133.4	205.17	145.93	171.01	110.35	keratin 19
4830	NME1	NM_000269,NM_198175	538.18	548.39	424.65	587.37	284.6	297.14	340.47	333.81	394.82	323.14	NME/NM23 nucleoside diphosphate kinase 1
6147	RPL23A	NM_000984	541.51	544.04	473.32	547.9	366.63	1087.89	1148.1	1046.56	1253.21	1036.88	ribosomal protein L23a
3068	HDGF	NM_001126050,NM_001126051,NM_001319186,NM_001319187,NM_001319188,NM_004494	561.39	542.19	466.41	561.13	441.47	391.07	464.07	437.71	490.8	434.88	heparin binding growth factor
4666	NACA	NM_001113201,NM_001113202,NM_001113203,NM_001320193,NM_001320194,NM_005594	530.07	541.41	452.53	550.45	371.54	1533.27	1635.66	1538.25	1892.61	1533.69	nascent polypeptide-associated complex alpha subunit
23406	COTL1	NM_021149	515.48	541.29	411.06	545.42	329.74	546.35	683.91	553.97	807.56	593.11	coactosin like F-actin binding protein 1
10410	IFITM3	NM_021034	362.33	530.3	1010.14	505.76	1446.61	553.96	582.55	641.83	636.15	686.22	interferon induced transmembrane protein 3
6166	RPL36AL	NM_001001	552.56	528.67	550.11	588.72	494.26	277.92	257.01	265.82	289.4	260.16	ribosomal protein L36a like
6207	RPS13	NM_001017	567	527.73	433.75	593.33	344.32	993.71	1091.72	1004.52	1249.64	1045.27	ribosomal protein S13
7167	TPI1	NM_000365,NM_001159287,NM_001258026	500.19	518.1	462.22	572.59	384.54	928.79	1033.18	1017.62	1204.89	1038.18	triosephosphate isomerase 1
7534	YWHAZ	NM_001135699,NM_001135700,NM_001135701,NM_001135702,NM_003406,NM_145690	650.2	515.37	475.66	531.67	436.28	469.31	503.13	486.86	515.32	467.19	tyrosine 3-monooxygenase/tryptophan 5-monooxygenase activation protein zeta
3105	HLA-A	NM_001242758,NM_002116	429.88	512.79	1004.04	533.81	1809.79	317.02	275.99	341.73	319.85	375.36	major histocompatibility complex, class I, A
292	SLC25A5	NM_001152	475.65	510.52	414.49	532.9	312.95	664.46	721.91	687.53	806.27	688.42	solute carrier family 25 member 5
1351	COX8A	NM_004074	396.05	509.54	509.25	591.99	456.47	445.58	457.08	502.88	457.37	494.07	cytochrome c oxidase subunit 8A
3945	LDHB	NM_001174097,NM_001315537,NM_002300	539.38	507.71	461.29	574.56	308.84	950.51	996.7	1004.05	1147.58	966.21	lactate dehydrogenase B
1938	EEF2	NM_001961	458.88	501.99	366.62	439.7	345.85	600.95	662.64	579.34	644.41	590.1	eukaryotic translation elongation factor 2
1933	EEF1B2	NM_001037663,NM_001959,NM_021121	577.5	499.92	354.08	521.33	266.79	402.62	426.31	394.28	466.76	403.6	eukaryotic translation elongation factor 1 beta 2
6167	RPL37	NM_000997	489.9	493.74	446.42	515.44	379.61	467.13	466.3	424.1	537.43	425.44	ribosomal protein L37
5691	PSMB3	NM_002795	447.35	486.94	446.32	522.4	407.03	243.35	263.55	258.73	295.26	258.45	proteasome subunit beta 3
6158	RPL28	NM_000991,NM_001136134,NM_001136135,NM_001136136,NM_001136137	480.12	481.56	409.41	492.69	383.24	296.64	316.92	275.94	332.31	306	ribosomal protein L28
1973	EIF4A1	NM_001204510,NM_001416	592.27	480.95	438.35	471.66	370.38	602.07	548.65	515.84	546.68	496.63	eukaryotic translation initiation factor 4A1
9045	RPL14	NM_001034996,NM_003973	494.02	478.1	344.42	509.11	251.84	584.72	637.37	623.81	766.87	619.28	ribosomal protein L14
517	ATP5MC2	NM_001002031,NM_001330269,NM_005176	372.27	471.26	432.96	456.26	371.56	606.84	613.63	661.27	627.48	673.5	ATP synthase membrane subunit c locus 2
7314	UBB	NM_001281716,NM_001281717,NM_001281718,NM_001281719,NM_001281720,NM_018955	389.46	461.69	501.91	504.42	585.81	1113.1	1221.93	1177.54	1254.28	1242.68	ubiquitin B
26472	PPP1R14B	NM_138689	409.84	461.42	380.79	450.64	321.85	327.4	362.84	350.69	368.24	328.7	protein phosphatase 1 regulatory inhibitor subunit 14B
10577	NPC2	NM_006432	358.44	459.87	558.65	466.51	437.66	80.91	74.9	79.92	95.2	87.41	NPC intracellular cholesterol transporter 2
6164	RPL34	NM_000995,NM_001319232,NM_001319234,NM_001319235,NM_001319236,NM_033625	526.46	458.29	377.91	550.63	301.97	655.63	715.78	650.44	758.77	665.62	ribosomal protein L34
103910	MYL12B	NM_001144944,NM_001144945,NM_033546	495.66	453.08	433.37	530.06	396.58	211.08	232.08	209.18	268.29	219.33	myosin light chain 12B
506	ATP5F1B	NM_001686	477.2	451.55	375.39	471.95	329.51	1060.16	1105.12	1146.12	1266.83	1151.85	ATP synthase F1 subunit beta
4282	MIF	NM_002415	365.36	451.29	373.8	419.19	351.94	529.64	569.16	518.5	657.59	530.09	macrophage migration inhibitory factor
1603	DAD1	NM_001344	397.06	442.71	403.25	463.13	378.18	196.68	207.92	202.69	236.85	196.86	defender against cell death 1
10383	TUBB4B	NM_006088	445.04	440.18	373.29	469.33	275.04	549.71	638.43	633.48	616.05	606.92	tubulin beta 4B class IVb
5689	PSMB1	NM_002793	452.64	439.62	395.07	447.94	366.5	272.2	278.67	271.3	311.53	281.13	proteasome subunit beta 1
79144	PPDPF	NM_001353423,NM_024299	301.26	436.91	314.8	433.4	298.39	190.67	265.56	204.33	298.18	219.62	pancreatic progenitor cell differentiation and proliferation factor
6169	RPL38	NM_000999,NM_001035258	384.91	431.99	346.98	383.71	257.7	456.26	472	434.56	657	458.78	ribosomal protein L38
8655	DYNLL1	NM_001037494,NM_001037495,NM_003746	405.71	429.52	443.37	475.55	408.18	415.09	432.47	474.46	549.69	454.39	dynein light chain LC8-type 1
5230	PGK1	NM_000291	442.99	426.28	443.19	451.42	399.56	303.05	300.82	327.35	355.08	316.59	phosphoglycerate kinase 1
2280	FKBP1A	NM_000801,NM_001199786,NM_054014	416.67	425.5	450.29	496.89	439.59	206.22	241.51	209.17	267.48	216.78	FK506 binding protein 1A
3329	HSPD1	NM_002156,NM_199440	558.43	423.8	295.44	444.41	207.7	423.8	473.12	416.32	512.43	407.04	heat shock protein family D (Hsp60) member 1
805	CALM2	NM_001305624,NM_001305625,NM_001305626,NM_001743	584.48	423.7	457.21	463.56	433.36	379.78	341.22	356.45	382.56	355.05	calmodulin 2
7170	TPM3	NM_001043351,NM_001043352,NM_001043353,NM_001278188,NM_001278189,NM_001278190,NM_001278191,NM_001349679,NM_152263,NM_153649	494.86	421.91	372.31	442.72	344.4	257.92	283.06	276.35	315.31	284.92	tropomyosin 3
3015	H2AFZ	NM_002106	512.03	420.73	393.27	469.77	312.63	512.08	570.81	583.54	689.63	558.37	H2A histone family member Z
4691	NCL	NM_005381	632.55	419.65	379.36	407.42	256.9	370.95	370.23	317.65	377.95	314.23	nucleolin
1192	CLIC1	NM_001287593,NM_001287594,NM_001288	445.16	418.36	483.52	428.04	519.99	638.03	658.56	669.48	626.81	648.96	chloride intracellular channel 1
7052	TGM2	NM_001323316,NM_001323317,NM_001323318,NM_004613,NM_198951	464.49	415.32	481.54	365.16	486.28	459.56	710.61	383.89	739.58	374.49	transglutaminase 2
1337	COX6A1	NM_004373	389	410.05	446.84	455.36	447.08	390.89	373.31	402.12	421.28	426.79	cytochrome c oxidase subunit 6A1
334	APLP2	NM_001142276,NM_001142277,NM_001142278,NM_001243299,NM_001328682,NM_001328684,NM_001328685,NM_001328686,NM_001642	377	409.43	507.54	447.21	564.11	767.81	709.39	823.6	787.25	851.72	amyloid beta precursor like protein 2
140576	S100A16	NM_001317007,NM_001317008,NM_080388	413.61	404.82	492.5	420.43	514	404.65	346.93	410.75	374.3	412.58	S100 calcium binding protein A16
308	ANXA5	NM_001154	476.19	399.17	323.85	480.63	292.05	250.73	253.87	267.03	283.27	274.33	annexin A5
7009	TMBIM6	NM_001098576,NM_003217	387.4	397.45	459.72	446.86	517.99	553.58	579.97	589.54	676.27	612.68	transmembrane BAX inhibitor motif containing 6
6647	SOD1	NM_000454	314.56	394.71	298.88	443.7	243.4	265.85	311.48	300.85	357.14	296.74	superoxide dismutase 1
81892	SLIRP	NM_001267863,NM_001267864,NM_031210	375.31	392.34	311.7	427.44	256.42	172.48	181.79	198.49	230.99	200.5	SRA stem-loop interacting RNA binding protein
5479	PPIB	NM_000942	405.46	391.37	402.83	382.01	427.05	564.25	673.38	594.29	725.83	528.41	peptidylprolyl isomerase B
6275	S100A4	NM_002961,NM_019554	197.71	389.38	518.59	413.74	544.96	35.52	24.17	28.41	21.13	29.45	S100 calcium binding protein A4
7045	TGFBI	NM_000358	322.71	387.53	595.77	399.68	524.78	126.62	174.13	122.66	189.29	132.8	transforming growth factor beta induced
5692	PSMB4	NM_002796	427.12	385.92	371.55	437.31	368.17	280.01	298.84	303.18	323.26	296.78	proteasome subunit beta 4
3487	IGFBP4	NM_001552	306.37	385.7	346.1	341.98	342.27	106.97	191.86	94.04	171.25	109.17	insulin like growth factor binding protein 4
6628	SNRPB	NM_003091,NM_198216	422.24	383.83	317.07	380.47	287.33	170.83	166.53	175.59	182.25	174.55	small nuclear ribonucleoprotein polypeptides B and B1
5223	PGAM1	NM_001317079,NM_002629	392.83	379.49	347.91	396.01	314.14	336.44	339.91	348.64	386.72	350.87	phosphoglycerate mutase 1
4192	MDK	NM_001012333,NM_001012334,NM_001270550,NM_001270551,NM_001270552,NM_002391	262.33	379.36	760.4	414.81	1090.69	148.78	139.02	145.16	150.51	156.8	midkine
3094	HINT1	NM_005340	338.02	377.66	342.89	417.24	312.41	364.53	386.29	380.5	511.61	390.92	histidine triad nucleotide binding protein 1
3925	STMN1	NM_001145454,NM_005563,NM_203399,NM_203401	347.66	372.65	377.98	441.4	313.45	200.41	236.74	248.79	306.76	257	stathmin 1
7203	CCT3	NM_001008800,NM_005998	426.08	370.86	344.44	372	279.67	276.78	277.4	281.41	284.15	281.88	chaperonin containing TCP1 subunit 3
7295	TXN	NM_001244938,NM_003329	337.82	363.62	283.68	422.62	254.45	540.67	541.97	585.62	708.53	579.82	thioredoxin
6746	SSR2	NM_003145	363.99	362.16	367.57	371.52	348.69	274.19	293.57	264	301.33	269.2	signal sequence receptor subunit 2
4071	TM4SF1	NM_014220	391.56	361.52	400.09	385.36	277.4	256.1	202.35	193.27	176.35	191.02	transmembrane 4 L six family member 1
7531	YWHAE	NM_006761	352.98	361.06	345.08	372.78	291.23	446.91	477.61	460.57	505.08	461.75	tyrosine 3-monooxygenase/tryptophan 5-monooxygenase activation protein epsilon
821	CANX	NM_001024649,NM_001746	397.99	353.63	352.34	376.22	357.57	271.63	308.34	288.28	339.65	283.48	calnexin
3151	HMGN2	NM_005517	327.97	352.67	301.06	380.54	232.22	241.98	306.45	286.61	368.7	280.69	high mobility group nucleosomal binding domain 2
6902	TBCA	NM_001297738,NM_001297740,NM_004607	388.76	348.37	285.15	361.49	262.5	303.99	266.66	294.33	304.44	293.99	tubulin folding cofactor A
5688	PSMA7	NM_002792	349.72	346.73	312.21	362.17	275.01	374.58	399.22	388.76	447.25	380.9	proteasome subunit alpha 7
8878	SQSTM1	NM_001142298,NM_001142299,NM_003900	258.64	342.69	457.83	341.98	892.77	245.81	233.25	254.37	236.93	275.83	sequestosome 1
3150	HMGN1	NM_004965	323.2	341.2	306.1	362.42	251.73	267.43	348.13	303.82	411.92	304.28	high mobility group nucleosome binding domain 1
1163	CKS1B	NM_001826	353.21	339.35	337.64	374.61	281.59	188.87	201.8	246.2	241.85	244.13	CDC28 protein kinase regulatory subunit 1B
8870	IER3	NM_003897	256.48	339.02	324.53	235.42	342.9	175.76	128.93	161.65	75.87	153.17	immediate early response 3
5687	PSMA6	NM_001282232,NM_001282233,NM_001282234,NM_002791	319.11	338.5	327.29	375.33	315.87	185.25	189.93	197.43	215.92	205.33	proteasome subunit alpha 6
4493	MT1E	NM_175617	512.15	338.4	414.26	391.65	256.56	651.76	885	660.77	740.7	637.25	metallothionein 1E
1535	CYBA	NM_000101	264.76	338.12	396.58	321.37	450.95	501.71	519.3	498.36	517.4	477.29	cytochrome b-245 alpha chain
4946	OAZ1	NM_001301020,NM_004152	273.89	337.9	281.3	335.42	247.51	499.04	518.71	536.6	592.26	548.95	ornithine decarboxylase antizyme 1
3181	HNRNPA2B1	NM_002137,NM_031243	410.36	337.68	304.98	341.19	208.81	372.08	389.58	413.15	417.38	385.56	heterogeneous nuclear ribonucleoprotein A2/B1
10094	ARPC3	NM_001278556,NM_001287222	326.95	335.61	356.34	390.77	319.5	266.19	276.97	293.48	330.85	301.61	actin related protein 2/3 complex subunit 3
51637	RTRAF	NM_016039	413.56	334.88	313.81	381.51	294.79	146.71	156.14	153.41	173.45	153.47	RNA transcription, translation and transport factor
481	ATP1B1	NM_001677	289.01	331.9	372.76	337.92	546.43	80.45	53.61	79.85	53.54	80.81	ATPase Na+/K+ transporting subunit beta 1
967	CD63	NM_001257389,NM_001257390,NM_001257391,NM_001257392,NM_001257400,NM_001257401,NM_001267698,NM_001780	296.55	330.32	419.82	384.63	467.94	696.46	584.5	684.01	656.26	640.18	CD63 molecule
1349	COX7B	NM_001866	279.39	327.72	319.34	356.8	287.41	359.07	433.26	407.11	496.83	401.66	cytochrome c oxidase subunit 7B
5111	PCNA	NM_002592,NM_182649	345	321.33	290.05	358.56	227.54	126.09	139.25	128.34	169.69	138.81	proliferating cell nuclear antigen
11034	DSTN	NM_001011546,NM_006870	294.72	316.96	288.05	370.7	259.19	120.75	117.37	126.99	137.26	133.21	destrin, actin depolymerizing factor
10109	ARPC2	NM_005731,NM_152862	339.8	316.71	332.05	361.16	307.56	224.82	244.04	234.84	259.79	236.86	actin related protein 2/3 complex subunit 2
10728	PTGES3	NM_001282601,NM_001282602,NM_001282603,NM_001282604,NM_001282605,NM_006601	385.69	316.56	284.4	289.98	230.1	677.93	755.86	678.1	723.87	624.01	prostaglandin E synthase 3
3675	ITGA3	NM_002204	322.2	315.07	459.22	287.86	568.64	216.64	155.6	193.4	146.01	213.59	integrin subunit alpha 3
7178	TPT1	NM_001286272,NM_001286273,NM_003295	298.34	314.79	256.73	350.17	230.54	397.72	404.16	359.3	455.17	364.17	tumor protein, translationally-controlled 1
2079	ERH	NM_004450	381.68	313.72	298.55	344.2	239.61	142.73	148.54	152.66	156.68	148.36	ERH, mRNA splicing and mitosis factor
351	APP	NM_000484,NM_001136016,NM_001136129,NM_001136130,NM_001136131,NM_001204301,NM_001204302,NM_001204303,NM_201413,NM_201414	285.07	312.37	515.61	328.69	660.03	293.36	224.89	295.81	242.23	308.96	amyloid beta precursor protein
516	ATP5MC1	NM_001002027,NM_005175	274.31	311.87	252.6	372.3	177.48	222.72	253.62	252.16	284.09	263.58	ATP synthase membrane subunit c locus 1
1173	AP2M1	NM_001025205,NM_001311198,NM_004068	301.31	310.53	308.46	345.05	300.5	297.24	309.06	328.41	338.52	318.97	adaptor related protein complex 2 mu 1 subunit
2923	PDIA3	NM_005313	290.97	309.99	300.29	344.14	287.88	210.25	281.52	243.43	327.46	234.16	protein disulfide isomerase family A member 3
3927	LASP1	NM_001271608,NM_006148	351.83	309.54	325.84	296.46	319.8	197.49	215.51	204.02	212.5	204.6	LIM and SH3 protein 1
10971	YWHAQ	NM_006826	309.64	309.11	275.41	353.78	248.6	292.46	285.97	314.48	317.81	320.48	tyrosine 3-monooxygenase/tryptophan 5-monooxygenase activation protein theta
826	CAPNS1	NM_001003962,NM_001302632,NM_001302633,NM_001749	280.7	308.78	332.77	335.46	299.11	308.35	281.51	260.63	279.18	272.55	calpain small subunit 1
3918	LAMC2	NM_005562,NM_018891	223.85	297.73	234.3	318.98	196.71	17.84	41.83	14.83	44.82	17.82	laminin subunit gamma 2
200185	KRTCAP2	NM_173852	289.31	296.96	290.93	304.71	300.51	160.56	171.89	165.73	201.86	163.43	keratinocyte associated protein 2
5034	P4HB	NM_000918	286.9	296.02	272.4	329.77	311.34	419.1	441.45	432.02	469.94	434.38	prolyl 4-hydroxylase subunit beta
6138	RPL15	NM_001253379,NM_001253380,NM_001253382,NM_001253383,NM_001253384,NM_002948	297.78	293.59	268.39	293.27	222.32	448.44	456.21	429.06	462.86	437.94	ribosomal protein L15
55505	NOP10	NM_018648	236.67	292.83	276.93	310.93	248.69	222.59	205.39	223.85	277.8	226.48	NOP10 ribonucleoprotein
3091	HIF1A	NM_001243084,NM_001530,NM_181054	281.6	292.01	328.85	273.35	362.54	51.78	43.32	56.58	46.11	55.73	hypoxia inducible factor 1 alpha subunit
498	ATP5F1A	NM_001001935,NM_001001937,NM_001257334,NM_001257335,NM_004046	265.2	291.87	247.09	304.28	199.98	183.5	183.73	193.06	207.79	196.04	ATP synthase F1 subunit alpha
5901	RAN	NM_001300796,NM_001300797,NM_006325	353.61	291.15	271.23	302.21	192.98	250.7	242.09	223.6	281.05	218.84	RAN, member RAS oncogene family
10627	MYL12A	NM_001303047,NM_001303048,NM_001303049,NM_006471	388.73	290.71	378.02	282.08	419.96	169.73	132.71	142.74	132.08	136.83	myosin light chain 12A
7416	VDAC1	NM_003374	316.21	289.98	232.96	309.31	196.07	227.52	231.71	241.79	265.61	250.82	voltage dependent anion channel 1
3020	H3F3A	NM_002107	299.23	288.23	325.59	328.3	291.92	520.91	551.95	554.11	669	564.63	H3 histone family member 3A
100128731	OST4	NM_001134693	235.42	287.98	249.56	300.43	220.38	194.95	170.79	206.44	242.1	190.91	oligosaccharyltransferase complex subunit 4, non-catalytic
10130	PDIA6	NM_001282704,NM_001282705,NM_001282706,NM_001282707,NM_005742	266.56	287.83	291.73	315.29	266.91	236.81	273.85	244.6	305.26	231.44	protein disulfide isomerase family A member 6
7168	TPM1	NM_000366,NM_001018004,NM_001018005,NM_001018006,NM_001018007,NM_001018008,NM_001018020,NM_001301244,NM_001301289,NM_001330344,NM_001330346,NM_001330351	450.7	286.24	405.06	274.31	367.48	309.51	348.19	227.73	302.83	218.79	tropomyosin 1
1936	EEF1D	NM_001130053,NM_001130055,NM_001130056,NM_001130057,NM_001195203,NM_001289950,NM_001317743,NM_001330646,NM_001960,NM_032378	338.92	282.39	236.28	260.45	216.54	372.11	437.03	391.12	425.45	366	eukaryotic translation elongation factor 1 delta
57142	RTN4	NM_001321859,NM_001321860,NM_001321861,NM_001321862,NM_001321863,NM_001321904,NM_007008,NM_020532,NM_153828,NM_207520,NM_207521	303.45	281.41	310.9	291.41	327.91	191.62	160.77	172.08	164.56	166.47	reticulon 4
51629	SLC25A39	NM_001143780,NM_001321240,NM_001321241,NM_016016	244.31	280.82	213.12	282.67	197.16	147.74	181.7	154.13	195.78	158.98	solute carrier family 25 member 39
51142	CHCHD2	NM_001320327,NM_016139	261.43	280.08	237.87	297.6	211.86	348.51	390.83	364.61	436.1	355.2	coiled-coil-helix-coiled-coil-helix domain containing 2
6161	RPL32	NM_000994,NM_001007073,NM_001007074	283.68	278.57	222.77	297.76	177.22	261.68	285.5	249.28	336.78	253.99	ribosomal protein L32
3958	LGALS3	NM_001357678,NM_002306	233.93	277.07	323.54	297.27	374.49	161.97	152.85	172.65	159.8	182.8	galectin 3
5878	RAB5C	NM_001252039,NM_004583,NM_201434	289.44	276	289.71	287.88	312.18	173.79	162.2	169.99	155.4	179.57	RAB5C, member RAS oncogene family
10581	IFITM2	NM_006435	219.07	275.56	393.8	289.73	410.93	54.79	63.73	65.59	68.5	64.92	interferon induced transmembrane protein 2
7388	UQCRH	NM_001297565,NM_001297566,NM_006004	255.49	272.72	243.55	302.14	200.88	320.06	368.63	349.09	440.02	344.01	ubiquinol-cytochrome c reductase hinge protein
1982	EIF4G2	NM_001042559,NM_001172705,NM_001418	340.85	272.56	260.13	267.37	226.41	402.8	395.79	409.49	433.55	423.16	eukaryotic translation initiation factor 4 gamma 2
3608	ILF2	NM_001267809,NM_004515	318.83	272.02	292.26	274.33	241.93	170.85	180.88	171.97	190.56	170.54	interleukin enhancer binding factor 2
682	BSG	NM_001322243,NM_001728,NM_198589,NM_198590,NM_198591	260.31	270.7	341.68	302.39	390.98	306.73	310.58	314.74	329.15	339	basigin (Ok blood group)
1327	COX4I1	NM_001318786,NM_001318788,NM_001318794,NM_001318797,NM_001318802,NM_001861	252.51	269.81	261.36	279.96	229.98	301.64	324.71	320.93	368.43	324.4	cytochrome c oxidase subunit 4I1
3956	LGALS1	NM_002305	171.93	269.75	394.38	270.48	532.26	293.92	223.84	292.19	228.56	323.45	galectin 1
5250	SLC25A3	NM_002635,NM_005888,NM_213611	311.6	269.71	234.67	290.37	186.7	347.4	351.45	312.26	401.33	317.91	solute carrier family 25 member 3
6402	SELL	NM_000655	129.19	269.13	843.06	285.34	958.44	5.2	6.19	11.57	6.99	14.01	selectin L
5660	PSAP	NM_001042465,NM_001042466,NM_002778	222.83	268.06	407.32	276.03	663.54	177.69	125.12	194.63	146.83	205.07	prosaposin
4738	NEDD8	NM_006156	250.33	264.74	267.37	295.75	238.84	146.69	142.76	158.9	188.76	163.58	neural precursor cell expressed, developmentally down-regulated 8
1622	DBI	NM_001079862,NM_001079863,NM_001178017,NM_001178041,NM_001178042,NM_001178043,NM_001282633,NM_001282634,NM_001282635,NM_001282636,NM_001352432,NM_020548	233.75	263.96	185.33	278.64	121.64	790.66	520.29	764.83	605.6	735.43	diazepam binding inhibitor, acyl-CoA binding protein
64073	C19orf33	NM_001317801,NM_033520	251.84	263.67	215.97	258.13	191.18	148.28	158.97	168.94	176.62	182.56	chromosome 19 open reading frame 33
2224	FDPS	NM_001135821,NM_001135822,NM_001242824,NM_001242825,NM_002004	215.5	262.09	188.86	292.68	132.08	132.05	143.35	138.32	168.63	135.83	farnesyl diphosphate synthase
5245	PHB	NM_001281496,NM_001281497,NM_001281715,NM_002634	260.34	261.15	216.8	274.41	191.48	156.16	171.44	163.49	194.87	168.42	prohibitin
8667	EIF3H	NM_003756	274.59	260.95	229.89	293.45	192.4	308.64	333.95	325.08	356.95	328.76	eukaryotic translation initiation factor 3 subunit H
2029	ENSA	NM_004436,NM_207042,NM_207043,NM_207044,NM_207045,NM_207046,NM_207047,NM_207168	222.44	260.95	244.78	298.94	212.53	114.83	135.79	136.96	153.25	142.66	endosulfine alpha
8815	BANF1	NM_001143985,NM_003860	243.15	260.88	258.03	293.38	204.13	362.82	400.51	385.16	422.7	383.54	barrier to autointegration factor 1
3646	EIF3E	NM_001568	263.11	260.36	215.71	258.11	158.13	270.61	308.41	274.85	325.25	271.01	eukaryotic translation initiation factor 3 subunit E
1476	CSTB	NM_000100	236.41	260.24	251.43	262.6	323.73	285.21	294.89	255.66	370.45	263.69	cystatin B
3190	HNRNPK	NM_001318186,NM_001318187,NM_001318188,NM_002140,NM_031262,NM_031263	297.15	258.6	263.98	249.85	222.72	281.52	297.37	278.88	292.07	263.52	heterogeneous nuclear ribonucleoprotein K
4841	NONO	NM_001145408,NM_001145409,NM_001145410,NM_007363	300.18	257.63	257.16	244.13	219.6	348.51	350.57	330.37	352.47	324.71	non-POU domain containing octamer binding
4725	NDUFS5	NM_001184979,NM_004552	227.22	257.28	240.97	272.17	203.84	182.43	187.22	198.91	236.64	198.01	NADH:ubiquinone oxidoreductase subunit S5
3182	HNRNPAB	NM_004499,NM_031266	338.19	256.55	235.17	245.29	185.16	243.87	237.98	218.57	230.02	222.57	heterogeneous nuclear ribonucleoprotein A/B
51504	TRMT112	NM_001286082,NM_001286084,NM_016404	223.99	256.51	189.79	265.23	170.03	166.81	169.7	182.84	180.65	178.36	tRNA methyltransferase subunit 11-2
7386	UQCRFS1	NM_006003	274.76	256.34	236.74	267.17	223.49	72.69	67.92	68.9	78.4	70.51	ubiquinol-cytochrome c reductase, Rieske iron-sulfur polypeptide 1
6727	SRP14	NM_001309434,NM_003134	240.09	255.97	257.61	304.44	273.07	259.16	267.82	294.72	339.64	299.89	signal recognition particle 14
5721	PSME2	NM_002818	191.48	255.41	339.94	287.19	341.93	175.96	207.65	213.84	273.12	230.04	proteasome activator subunit 2
6146	RPL22	NM_000983	264.77	255.13	200.63	281.82	164.09	266.51	299.32	271.29	363.34	264.22	ribosomal protein L22
81	ACTN4	NM_001322033,NM_004924	297.22	254.44	286.1	227.8	263.4	212.25	229.8	210.18	215.95	212.92	actinin alpha 4
2316	FLNA	NM_001110556,NM_001456	304.07	252.21	275.27	239.04	276.32	174.94	210.16	184.48	207.49	196.9	filamin A
3183	HNRNPC	NM_001077442,NM_001077443,NM_004500,NM_031314	360.97	252.04	224.88	246.31	197.11	228.74	243.24	236.9	269.35	221.66	heterogeneous nuclear ribonucleoprotein C (C1/C2)
3191	HNRNPL	NM_001005335,NM_001533	229.61	251.3	199.41	274.86	152.32	243.06	253.95	252.06	255.47	250.54	heterogeneous nuclear ribonucleoprotein L
301	ANXA1	NM_000700	290.67	249.19	280.34	275.04	266.44	197.64	179.5	215.81	197.07	229.59	annexin A1
293	SLC25A6	NM_001636	200.58	249.13	171.44	230.77	147.9	231.05	267.24	220.07	267.8	235.16	solute carrier family 25 member 6
7520	XRCC5	NM_021141	271.58	248.61	236.01	262.73	175.77	189.5	192.22	189.82	195.27	191.82	X-ray repair cross complementing 5
8644	AKR1C3	NM_001253908,NM_001253909,NM_003739	120.93	248.02	255.19	267.19	289.57	79.09	33.69	94.36	37.26	100.32	aldo-keto reductase family 1 member C3
84311	MRPL45	NM_001278279,NM_032351	219.07	247.03	205.34	267.48	188.55	56.67	59.63	57.24	58.76	52.49	mitochondrial ribosomal protein L45
3429	IFI27	NM_001130080,NM_001288952,NM_001288954,NM_001288956,NM_001288957,NM_001288958,NM_001288959,NM_001288960,NM_001288995,NM_005532	33.9	246.41	1381.93	223.61	2658.64	1.43	0.35	2.1	0.86	2.65	interferon alpha inducible protein 27
1175	AP2S1	NM_001301076,NM_001301078,NM_001301081,NM_004069,NM_021575	211.08	246.09	204.55	266.16	183.52	199.31	212.85	204.11	231.45	201.57	adaptor related protein complex 2 sigma 1 subunit
10945	KDELR1	NM_006801	244.7	246	244.21	229.55	263.03	190.25	182.25	176.47	171.71	173.49	KDEL endoplasmic reticulum protein retention receptor 1
4000	LMNA	NM_001257374,NM_001282624,NM_001282625,NM_001282626,NM_005572,NM_170707,NM_170708	297.26	244.24	256.24	216.14	261.28	183.18	190.73	189.01	176.56	186.08	lamin A/C
2091	FBL	NM_001436	247.22	243.54	197.83	256.9	152.83	261.09	241.77	248	271.6	250.48	fibrillarin
5684	PSMA3	NM_002788,NM_152132	246.81	241.52	210.67	256.78	174.36	135.63	148.42	142.33	165.87	145.67	proteasome subunit alpha 3
387	RHOA	NM_001313941,NM_001313943,NM_001313944,NM_001313945,NM_001313946,NM_001313947,NM_001664	260.18	241.29	234.65	259.22	189.1	312.38	344.47	336.83	387.15	340.04	ras homolog family member A
100133941	CD24	NM_001291737,NM_001291738,NM_001291739,NM_001359084,NM_013230	328.21	239.92	311.78	246.31	280.9	56.29	37.13	93.46	39.61	81.44	CD24 molecule
10155	TRIM28	NM_005762	286.82	239.24	196.96	202.34	159.35	101.36	107.94	90.8	97.09	88.75	tripartite motif containing 28
9636	ISG15	NM_005101	58.98	238.46	683.22	236.03	1412.04	51.26	41.23	65.12	52.19	78.46	ISG15 ubiquitin-like modifier
4726	NDUFS6	NM_004553	203.66	236.49	214.43	263.86	174.71	177.24	193.08	201.03	228.87	206.19	NADH:ubiquinone oxidoreductase subunit S6
6185	RPN2	NM_001135771,NM_001324299,NM_001324301,NM_001324302,NM_001324303,NM_001324304,NM_001324305,NM_001324306,NM_002951	222.25	236.14	257.84	259.09	285.91	262.15	282.36	288.73	337.35	286.81	ribophorin II
527	ATP6V0C	NM_001198569,NM_001694	240.93	236.07	205.66	253.35	272.12	270.58	271.2	268.63	275.33	266.51	ATPase H+ transporting V0 subunit c
9588	PRDX6	NM_004905	253.23	235.98	214.03	284.78	177.95	158.55	177.79	178.54	213.99	179.93	peroxiredoxin 6
5700	PSMC1	NM_001330212,NM_002802	274.55	235.52	215.49	251.14	189.78	166.56	169.84	164.69	190.64	162.92	proteasome 26S subunit, ATPase 1
1650	DDOST	NM_005216	201.97	235.22	232.33	250.5	248.29	87.99	88.44	95.42	101.27	94.96	dolichyl-diphosphooligosaccharide--protein glycosyltransferase non-catalytic subunit
3959	LGALS3BP	NM_005567	162.29	235.06	344.64	223.34	564.53	259.91	238.52	265.88	254.31	286.68	galectin 3 binding protein
2787	GNG5	NM_005274	230.63	234.86	219.11	247.39	205.47	222.94	207.16	248.64	233.93	246.52	G protein subunit gamma 5
9551	ATP5MF	NM_001003713,NM_001003714,NM_001039178,NM_004889	198.25	234.75	205.23	255.65	154.91	318.48	360.08	365.26	464.85	359.55	ATP synthase membrane subunit f
6633	SNRPD2	NM_004597,NM_177542	196.67	233.25	185.28	231.03	144.92	112.72	130.03	120.08	164.33	118.18	small nuclear ribonucleoprotein D2 polypeptide
6613	SUMO2	NM_001005849,NM_006937	238.24	231.75	226.23	253.86	203.73	235.52	226.06	234.34	265	236.15	small ubiquitin-like modifier 2
27166	PRELID1	NM_001271828,NM_013237	231.89	231.27	184.86	235.21	156.15	204.62	228.18	218.48	247.86	211.36	PRELI domain containing 1
23193	GANAB	NM_001278192,NM_001278193,NM_001278194,NM_001329222,NM_001329223,NM_001329224,NM_001329225,NM_198334,NM_198335	186.21	229.21	237.04	248.63	222.3	145.36	164.09	157.86	171.44	162.3	glucosidase II alpha subunit
4061	LY6E	NM_001127213,NM_002346	153.74	229.16	401.01	233.19	594.88	218.43	255.14	248.65	290.91	293.11	lymphocyte antigen 6 family member E
5217	PFN2	NM_002628,NM_053024	239.03	228.77	243.57	264.28	225.23	152.45	136.86	158.39	156.66	157.73	profilin 2
10574	CCT7	NM_001009570,NM_001166284,NM_001166285,NM_006429	254.62	228.51	204.8	236.64	166.65	244.08	253.74	263.42	277.02	260.33	chaperonin containing TCP1 subunit 7
6500	SKP1	NM_006930,NM_170679	201.17	228.24	228.94	266.05	233.91	164.36	172.64	190.81	213.84	188.73	S-phase kinase associated protein 1
3692	EIF6	NM_001267810,NM_002212,NM_181466,NM_181468	256.63	227.67	208.62	223.1	206.26	255.53	238.92	236.79	256.02	248.69	eukaryotic translation initiation factor 6
5879	RAC1	NM_006908,NM_018890	236.45	227.65	249.85	240.9	259.56	226.85	240.46	224.84	251.62	232.51	Rac family small GTPase 1
2539	G6PD	NM_000402,NM_001042351	185.67	227.4	182.02	234.42	197.18	203.62	147.5	192.56	161.24	193.81	glucose-6-phosphate dehydrogenase
4837	NNMT	NM_006169	221.79	227.13	222.85	236.52	154.99	64.36	73.47	77.68	71.02	77.51	nicotinamide N-methyltransferase
6696	SPP1	NM_000582,NM_001040058,NM_001040060,NM_001251829,NM_001251830	163.49	225.62	346.72	218.91	385.74	511.79	231.17	600.99	282.08	594.44	secreted phosphoprotein 1
1809	DPYSL3	NM_001197294,NM_001387	169.43	225.06	209.88	218.25	136.09	0.34	0.17	0.55	0.27	0.42	dihydropyrimidinase like 3
7171	TPM4	NM_001145160,NM_003290	269.78	224.89	257.29	235.39	248.75	84.34	106.13	88.87	104.5	85.08	tropomyosin 4
5464	PPA1	NM_021129	253.26	224.82	229.8	237.47	210.98	120.97	135.1	126.56	154.64	119.08	pyrophosphatase (inorganic) 1
11315	PARK7	NM_001123377,NM_007262	243.37	223.09	207.69	246.35	186.64	300.17	314.15	324.73	355.53	322.82	Parkinsonism associated deglycase
27018	BEX3	NM_001282674,NM_014380,NM_206915,NM_206917	170.74	223	224.32	237.37	209.03	199.91	198.28	211.18	242.3	211.07	brain expressed X-linked 3
5709	PSMD3	NM_002809	247.41	222.94	184.83	210.16	177.49	158.46	162.52	146.75	158.06	142.95	proteasome 26S subunit, non-ATPase 3
5328	PLAU	NM_001145031,NM_001319191,NM_002658	292.05	222.85	308.86	220.52	352.73	414.01	291.24	278.67	244.9	293.38	plasminogen activator, urokinase
64968	MRPS6	NM_032476	165.03	222.5	245.03	200.23	216.95	154.47	147.42	161.45	136.58	148.86	mitochondrial ribosomal protein S6
5708	PSMD2	NM_001278708,NM_001278709,NM_002808	238.29	222.48	203.61	246.86	175.79	200.8	209.72	206.72	240.49	201.88	proteasome 26S subunit, non-ATPase 2
387882	C12orf75	NM_001145199	263.16	221.67	209.74	229.92	173.12	260.86	262.02	276.53	289.7	265.4	chromosome 12 open reading frame 75
10606	PAICS	NM_001079524,NM_001079525,NM_006452	230.29	220.55	172.52	251.03	127.82	207.13	226.13	228.22	261.78	228.35	phosphoribosylaminoimidazole carboxylase and phosphoribosylaminoimidazolesuccinocarboxamide synthase
22943	DKK1	NM_012242	298.18	219.88	239.51	181.31	106.61	249.08	146.04	169.18	91.62	154.04	dickkopf WNT signaling pathway inhibitor 1
8663	EIF3C	NM_001037808,NM_001199142,NM_001267574,NM_001286478,NM_003752	253.14	219.53	204.99	214.1	180.53	241.64	249.66	256.64	245.49	252.32	eukaryotic translation initiation factor 3 subunit C
1396	CRIP1	NM_001311	146.67	219.16	236.74	233.64	257.17	2.08	1.12	0.97	1.11	0.55	cysteine rich protein 1
1917	EEF1A2	NM_001958	217.17	216.77	192.73	203.48	232.01	36.26	32.8	36.15	33.39	28.03	eukaryotic translation elongation factor 1 alpha 2
4710	NDUFB4	NM_001168331,NM_004547	171.26	216.31	197.9	218.07	184.28	217.91	205.01	231.13	208.96	230.41	NADH:ubiquinone oxidoreductase subunit B4
6137	RPL13	NM_000977,NM_001243130,NM_001243131,NM_033251	199.82	216.15	188.06	203.45	148.72	237.66	276.1	233.52	289.59	230.3	ribosomal protein L13
3728	JUP	NM_001352773,NM_001352774,NM_001352775,NM_001352776,NM_001352777,NM_002230,NM_021991	157.14	213.24	251.04	211.01	317.78	11.52	16.42	10.81	14.94	10.64	junction plakoglobin
131566	DCBLD2	NM_080927	226.7	213.09	228.42	189.83	197.46	188.39	167.1	184.57	144.55	178.31	discoidin, CUB and LCCL domain containing 2
2547	XRCC6	NM_001288976,NM_001288977,NM_001288978,NM_001469	221.31	212.94	175.8	222.23	136.63	161.65	180.07	175.33	192.54	172.56	X-ray repair cross complementing 6
83442	SH3BGRL3	NM_031286	167.6	212.22	240.86	222.93	271.68	132.47	138.74	125.22	144.06	134.63	SH3 domain binding glutamate rich protein like 3
5093	PCBP1	NM_006196	175.28	210.99	207.9	188.07	202.18	205.71	199.1	180.27	160.03	168.09	poly(rC) binding protein 1
908	CCT6A	NM_001009186,NM_001762	268.49	210.84	197	208.17	147.67	221	222.81	215.12	231.23	207.87	chaperonin containing TCP1 subunit 6A
84321	THOC3	NM_032361	174.33	209.52	171.55	225.21	126.99	103.2	126.79	120.84	141.3	122.5	THO complex 3
7298	TYMS	NM_001071,NM_001354867,NM_001354868	199.89	209.47	160.21	216.1	107.97	207.22	231.16	228.7	240.09	217.02	thymidylate synthetase
5693	PSMB5	NM_001130725,NM_001144932,NM_002797	187.57	209.34	175	217.47	147.48	133.57	128.07	136.31	142.93	132.29	proteasome subunit beta 5
10589	DRAP1	NM_006442	179.46	208.98	172.79	215.71	153.88	289.43	312.99	280.31	329.87	279.11	DR1 associated protein 1
83658	DYNLRB1	NM_001281727,NM_001281728,NM_001281729,NM_001319157,NM_014183,NM_177953	186.64	207.84	205.81	240.63	268.73	330.42	307.83	350.09	329.08	370.06	dynein light chain roadblock-type 1
5685	PSMA4	NM_001102667,NM_001102668,NM_001330673,NM_001330675,NM_001330676,NM_002789	205.82	207.83	193.7	239.28	164.94	256.33	293.02	281.63	333.61	271.07	proteasome subunit alpha 4
3837	KPNB1	NM_001276453,NM_002265	279.62	207.66	196.92	149.26	149.66	174.53	157.32	141.7	112.15	136.42	karyopherin subunit beta 1
1266	CNN3	NM_001286055,NM_001286056,NM_001839	203.97	207.59	173.91	208.28	135.75	112.75	111.71	124.01	120.15	113.46	calponin 3
1434	CSE1L	NM_001256135,NM_001316	206.35	206.95	163.55	217.21	114.83	201.55	223.68	220.38	230.84	218.79	chromosome segregation 1 like
6637	SNRPG	NM_001317165,NM_001317166,NM_001317167,NM_001317168,NM_001317169,NM_001317171,NM_003096	207.65	206.82	158.57	222.9	143.7	195.27	195.08	206.94	244.78	185.37	small nuclear ribonucleoprotein polypeptide G
3855	KRT7	NM_005556	338.05	206.6	170.96	196.45	152.36	68.28	87.4	47.87	93.51	50.94	keratin 7
9232	PTTG1	NM_001282382,NM_001282383,NM_004219	235.91	206.3	222.89	242.37	138.88	314.33	325.46	358.62	335.71	344.32	pituitary tumor-transforming 1
539	ATP5PO	NM_001697	192.06	206.21	187	219.67	148.11	169.42	181.58	169.86	212.66	180.26	ATP synthase peripheral stalk subunit OSCP
4257	MGST1	NM_001260511,NM_001260512,NM_001267598,NM_020300,NM_145764,NM_145791,NM_145792	198.86	205.68	181.98	234.28	171.12	425.13	385.99	469.06	490.47	474.22	microsomal glutathione S-transferase 1
6612	SUMO3	NM_001286416,NM_006936	206.88	205.64	165.11	230.48	142.66	123.99	130.85	124.37	142.9	132.48	small ubiquitin-like modifier 3
6228	RPS23	NM_001025	206.39	205.49	150.77	200.11	118.31	182.31	191.78	191.62	248.48	189.27	ribosomal protein S23
7529	YWHAB	NM_003404,NM_139323	207.79	205.45	196.09	223.57	184.1	252.46	272.52	255.78	304.01	255.89	tyrosine 3-monooxygenase/tryptophan 5-monooxygenase activation protein beta
10959	TMED2	NM_001321445,NM_006815	257.68	205.44	221.5	217.14	210.42	164.18	170.28	161.78	179.16	160.65	transmembrane p24 trafficking protein 2
509	ATP5F1C	NM_001001973,NM_001320886,NM_005174	221.14	205.22	190.63	238.61	157.52	235.96	239.43	252.6	282.8	257.05	ATP synthase F1 subunit gamma
3336	HSPE1	NM_002157	269.27	204.99	163.05	207.75	129.68	226.26	239.44	241.4	291.12	221.05	heat shock protein family E (Hsp10) member 1
8754	ADAM9	NM_003816	207	204.36	199.1	217.89	159.06	78.79	88.07	86.71	98.36	84.39	ADAM metallopeptidase domain 9
93974	ATP5IF1	NM_016311,NM_178190,NM_178191	171.07	203.6	194.25	236.47	160.94	104.55	91.37	111.95	116.26	116.12	ATP synthase inhibitory factor subunit 1
5725	PTBP1	NM_002819,NM_031990,NM_031991	222.17	203.27	186.29	174.64	141.63	249.74	273.26	253.54	237.56	245.26	polypyrimidine tract binding protein 1
27335	EIF3K	NM_001300992,NM_001308393,NM_013234	198.41	202.47	208.29	215.77	168.25	152.77	158.53	163.78	184.57	164.67	eukaryotic translation initiation factor 3 subunit K
5710	PSMD4	NM_001330692,NM_002810	202.37	202.15	183.7	208.32	185.54	129.24	150.42	151.5	161.8	148.47	proteasome 26S subunit, non-ATPase 4
9144	SYNGR2	NM_001320523,NM_004710	189.85	201.72	171.09	186.23	150.31	87.06	91.32	79.31	83.99	77.68	synaptogyrin 2
10313	RTN3	NM_001265589,NM_001265590,NM_001265591,NM_006054,NM_201428,NM_201429,NM_201430	190.49	200.39	192.52	212.74	194.19	154.88	166.47	167.4	176.91	168.43	reticulon 3
3309	HSPA5	NM_005347	275.17	199.91	285.49	170.72	285.85	170.64	197.94	211.56	204.91	202.73	heat shock protein family A (Hsp70) member 5
29956	CERS2	NM_022075,NM_181746	210.35	199.02	208.59	206.46	227	138.2	136.09	137.44	146.51	145.05	ceramide synthase 2
529	ATP6V1E1	NM_001039366,NM_001039367,NM_001696	187.84	198.79	201.91	209	231.51	124.48	99.05	122.57	110.81	125.68	ATPase H+ transporting V1 subunit E1
4735	2022-09-02	NM_001008491,NM_001008492,NM_001282972,NM_001282973,NM_001321029,NM_001321030,NM_001321031,NM_001321032,NM_001321033,NM_001321034,NM_001321035,NM_001349287,NM_001349288,NM_001349289,NM_001349290,NM_001349291,NM_001349302,NM_001349304,NM_001349305,NM_001349306,NM_001349307,NM_001349308,NM_001349309,NM_001349310,NM_001349311,NM_001349312,NM_001349313,NM_001349314,NM_001349315,NM_004404,NM_006155	206.87	198.52	202.75	208.2	181.29	133	137.07	144.67	144.38	146.41	septin 2
1340	COX6B1	NM_001863	187.13	198.42	212.03	226.45	187.02	206.05	192.27	213.37	242.12	211.95	cytochrome c oxidase subunit 6B1
2896	GRN	NM_002087	132.88	198.41	274.08	199.23	500.82	111.73	111.61	108.48	118.04	116.82	granulin precursor
5441	POLR2L	NM_021128	177.49	197.8	197.58	224.28	172.68	250.8	266.26	263.93	304.82	279.83	RNA polymerase II subunit L
114908	TMEM123	NM_052932	204.45	197.35	205.71	228.33	217.87	122	149.14	132.28	171.67	134.97	transmembrane protein 123
5036	PA2G4	NM_006191	230.32	197.32	154.44	214.59	112.17	380.11	379.01	355.62	413.53	367.74	proliferation-associated 2G4
2202	EFEMP1	NM_001039348,NM_001039349	206.14	196.39	145.06	214.36	80.15	0.16	0.27	0.12	0.6	0.13	EGF containing fibulin extracellular matrix protein 1
10694	CCT8	NM_001282907,NM_001282908,NM_001282909,NM_006585	222.67	196.29	173.77	205.98	136.89	163.55	173.35	170.77	208.07	165.22	chaperonin containing TCP1 subunit 8
10262	SF3B4	NM_005850	192.65	195.67	172.66	205	170.91	108.66	115.73	104.36	116.59	103.12	splicing factor 3b subunit 4
84951	TNS4	NM_032865	199.11	195.44	125.83	183.25	104.27	5.53	5.33	1.05	2.89	0.37	tensin 4
10476	ATP5PD	NM_001003785,NM_006356	152.23	194.22	172.2	212.57	148.55	206.83	214.33	220.74	251.29	224.61	ATP synthase peripheral stalk subunit d
7311	UBA52	NM_001033930,NM_001321017,NM_001321018,NM_001321019,NM_001321020,NM_001321021,NM_001321022,NM_003333	196.18	193.86	167.49	206.6	152.98	139.33	146.99	139.78	184.14	147.23	ubiquitin A-52 residue ribosomal protein fusion product 1
801	CALM1	NM_006888	189.97	192.85	173.73	214.11	160.85	75.44	95.43	98.47	127.93	100.85	calmodulin 1
598	BCL2L1	NM_001191,NM_001317919,NM_001317920,NM_001317921,NM_001322239,NM_001322240,NM_001322242,NM_138578	197.59	192.64	212.55	183.4	200.53	209.15	174.71	172.07	151.53	167.89	BCL2 like 1
7283	TUBG1	NM_001070	138.26	192.2	135.72	202.44	107.86	99.05	97.77	120.03	108.25	127.3	tubulin gamma 1
23204	ARL6IP1	NM_001313858,NM_015161	227.65	192.18	281.98	205.1	271.61	248.77	249.69	287.37	276.67	265.94	ADP ribosylation factor like GTPase 6 interacting protein 1
6418	SET	NM_001122821,NM_001248000,NM_001248001,NM_003011	263.42	191.92	185.35	194.2	141.03	236.88	234.76	207.77	245.93	201.69	SET nuclear proto-oncogene
1329	COX5B	NM_001862	156.76	191.91	192.45	213.03	166.4	212.46	188.83	199.48	201.69	205.96	cytochrome c oxidase subunit 5B
87	ACTN1	NM_001102,NM_001130004,NM_001130005	207.95	191.74	205.38	178.87	212.4	90.26	95.18	87.71	88.44	89.75	actinin alpha 1
10963	STIP1	NM_001282652,NM_001282653,NM_006819	229.68	191.02	171.78	181.86	146.89	229.4	239.76	230.12	219.13	216.97	stress induced phosphoprotein 1
6184	RPN1	NM_002950	189.43	190.44	191.43	204.86	195.28	184.73	201.83	199.82	200.66	200.64	ribophorin I
10487	CAP1	NM_001105530,NM_001330502,NM_001350475,NM_001350476,NM_001350477,NM_001350478,NM_001350479,NM_001350480,NM_001350481,NM_001350482,NM_001350483,NM_001350484,NM_001350485,NM_006367	204.16	190.31	194.24	212.29	193.22	159.02	166.98	172.03	173.86	173.32	cyclase associated actin cytoskeleton regulatory protein 1
10935	PRDX3	NM_001302272,NM_006793	169.54	189.96	173.05	217.95	156.06	214.13	229.44	248.85	279.21	247.02	peroxiredoxin 3
3313	HSPA9	NM_004134	233.83	189.91	180.83	198.09	174.27	188.13	177.09	187.86	178.57	185.11	heat shock protein family A (Hsp70) member 9
5092	PCBD1	NM_000281,NM_001289797,NM_001323004	161.98	189.59	138.56	210.52	102.36	181.11	216.74	202.43	243.57	196	pterin-4 alpha-carbinolamine dehydratase 1
3276	PRMT1	NM_001207042,NM_001536,NM_198318	198.24	189.42	152.1	172.31	134.32	158.68	166.09	144.06	151.15	138.7	protein arginine methyltransferase 1
5094	PCBP2	NM_001098620,NM_001128911,NM_001128912,NM_001128913,NM_001128914,NM_005016,NM_031989	215	189.4	171.72	183.79	154.65	281.87	288.29	270.5	286.7	274.71	poly(rC) binding protein 2
5204	PFDN5	NM_002624,NM_145897	166.02	189.03	181.59	217.07	178.2	242.06	242.5	269.78	295.09	265.53	prefoldin subunit 5
5202	PFDN2	NM_012394	180.5	188.75	185.43	186.58	205.53	87.45	88.97	88.96	100.03	91.87	prefoldin subunit 2
22948	CCT5	NM_001306153,NM_001306154,NM_001306155,NM_001306156,NM_012073	228.68	188.04	174.48	193.23	127.49	172.23	175.32	164.61	178.08	160.61	chaperonin containing TCP1 subunit 5
7037	TFRC	NM_001128148,NM_001313965,NM_001313966,NM_003234	234.4	187.73	152.08	194.78	123	90.51	60.59	94.44	69.29	93.96	transferrin receptor
328	APEX1	NM_001244249,NM_001641,NM_080648,NM_080649	201.96	187.22	208.32	166.44	183.82	144.01	161.86	130.3	142.22	124.07	apurinic/apyrimidinic endodeoxyribonuclease 1
808	CALM3	NM_001329921,NM_001329922,NM_001329923,NM_001329924,NM_001329925,NM_001329926,NM_005184	214.23	186.82	174.53	202.34	153.33	210.84	230.77	233.07	241.78	237.27	calmodulin 3
9415	FADS2	NM_001281501,NM_001281502,NM_004265	145.18	186.24	136.38	163.92	96.01	21.74	28.55	24.66	29.01	25.79	fatty acid desaturase 2
7335	UBE2V1	NM_001032288,NM_001257393,NM_001257394,NM_001257395,NM_001257396,NM_001257397,NM_001257398,NM_001257399,NM_001282575,NM_001282576,NM_001282577,NM_001282578,NM_001282579,NM_001282580,NM_021988,NM_022442,NM_199144	190.23	185.06	166.5	190.34	146.95	220.13	230.61	215.66	243.78	223.34	ubiquitin conjugating enzyme E2 V1
521	ATP5ME	NM_007100	148.39	185	146.03	223.01	126.31	171.31	196.94	179.61	239.09	178.64	ATP synthase membrane subunit e
5872	RAB13	NM_001272038,NM_002870	165.54	184.44	201.79	191.41	198.62	112.3	116.05	109.12	122.98	112.47	RAB13, member RAS oncogene family
6726	SRP9	NM_001130440,NM_003133	171.75	184.27	168.03	203.24	142.33	226.4	255.31	241.05	290.74	241.96	signal recognition particle 9
132299	OCIAD2	NM_001014446,NM_001286773,NM_001286774,NM_152398	189.63	182.99	184.59	208.57	186.06	75.1	82	74.92	104.32	80.93	OCIA domain containing 2
10653	SPINT2	NM_001166103,NM_021102	166.17	182.83	161.64	186.92	173.57	162.76	174.81	174.09	183.72	167.36	serine peptidase inhibitor, Kunitz type 2
684	BST2	NM_004335	107.89	182.61	338.11	193	411.87	105.85	97.53	128.14	104.5	124.92	bone marrow stromal cell antigen 2
4696	NDUFA3	NM_004542	140.96	182.56	161.63	185.32	153.46	128.62	126.89	122.79	166.7	142.41	NADH:ubiquinone oxidoreductase subunit A3
2665	GDI2	NM_001115156,NM_001494	233.47	182.32	176.47	186.1	142.09	198.85	195.43	181.06	188.72	182.24	GDP dissociation inhibitor 2
114569	MAL2	NM_052886	223.79	182.26	120.04	199.56	88.22	25.49	38.54	21.83	39.14	13.3	mal, T cell differentiation protein 2 (gene/pseudogene)
4707	NDUFB1	NM_004545	151.23	182.19	151.79	210.87	143.79	103.5	87.89	114.09	123.78	113.04	NADH:ubiquinone oxidoreductase subunit B1
4267	CD99	NM_001122898,NM_001321367,NM_001321368,NM_001321369,NM_001321370,NM_002414	144.52	181.8	210.5	194.13	250.21	118.33	121.96	114.11	136.54	115.87	CD99 molecule (Xg blood group)
1509	CTSD	NM_001909	157.28	181.51	173.43	177.99	320.06	918.93	675.86	864.59	628.04	813.72	cathepsin D
998	CDC42	NM_001039802,NM_001791,NM_044472	216.89	181.31	183.94	194.01	170.27	115.33	114.71	111.66	123.2	108.85	cell division cycle 42
10960	LMAN2	NM_006816	151.25	180.97	196.76	189.9	224.02	117.19	120.31	125.42	131.36	129.82	lectin, mannose binding 2
10197	PSME3	NM_001267045,NM_001330229,NM_005789,NM_176863	209.92	179.85	174.17	190.87	152.47	108.21	98.36	97.86	108	102.91	proteasome activator subunit 3
10632	ATP5MG	NM_006476	158.25	179.85	155.05	185.28	134.85	206.05	205.19	204.07	248.16	209.84	ATP synthase membrane subunit g
51614	ERGIC3	NM_015966,NM_198398	155.09	179.75	172.28	189.5	185.32	186.64	185.21	172.42	206.38	177.69	ERGIC and golgi 3
7086	TKT	NM_001064,NM_001135055,NM_001258028	180.27	179.54	146.27	162.54	126.15	486.35	509.32	516.31	451.69	477.32	transketolase
55969	C20orf24	NM_001199534,NM_018840,NM_199483	182.15	179.52	155.86	188.41	178.79	260.96	244.46	248.05	254.11	232.25	chromosome 20 open reading frame 24
128240	NAXE	NM_144772	147.63	178.16	137.94	201.53	128.05	90.37	105.95	112.25	125.57	125.98	NAD(P)HX epimerase
9524	TECR	NM_001321170,NM_138501	132.59	178.04	159.64	189.21	141.2	149.4	175.09	154.84	186.37	159.12	trans-2,3-enoyl-CoA reductase
10576	CCT2	NM_001198842,NM_006431	223.05	177.8	155.27	181.99	116.72	208.16	199.03	200.39	212.99	194.02	chaperonin containing TCP1 subunit 2
81876	RAB1B	NM_030981	144.67	176.26	158.56	185.48	153.88	247.32	261.31	259.87	261.12	262.16	RAB1B, member RAS oncogene family
1728	NQO1	NM_000903,NM_001025433,NM_001025434,NM_001286137	144.09	176.17	148.52	194.38	174.03	284.21	259.85	301.24	309.11	302.44	NAD(P)H quinone dehydrogenase 1
2782	GNB1	NM_001282538,NM_001282539,NM_002074	192.9	176.17	188.8	166.65	187.24	187.24	171.2	177.79	158.26	182.23	G protein subunit beta 1
7284	TUFM	NM_003321	171.77	175.94	138.15	181.03	120.31	137.36	154.19	149.67	164.47	142.91	Tu translation elongation factor, mitochondrial
6415	SELENOW	NM_003009	145.45	175.26	152.26	187.06	139.34	80.09	94.8	96.38	105.78	96.44	selenoprotein W
6319	SCD	NM_005063	170.61	175.25	135.45	176.93	75.75	492.1	317.37	412.99	334.14	372.84	stearoyl-CoA desaturase
8992	ATP6V0E1	NM_003945	174.45	174.81	208.11	183.7	278.67	205.39	176.86	193.17	215.33	186.87	ATPase H+ transporting V0 subunit e1
2876	GPX1	NM_000581,NM_001329455,NM_001329502,NM_001329503,NM_201397	136.33	174.79	161.44	192.79	149.81	235.66	265.33	271.76	313.07	293.15	glutathione peroxidase 1
8099	CDK2AP1	NM_001270433,NM_001270434,NM_004642	162.16	174.71	146.91	207.54	120.55	114.55	124.1	130.02	157.7	140.02	cyclin dependent kinase 2 associated protein 1
55651	NHP2	NM_001034833,NM_017838	150.82	174.11	153.41	188.18	129.56	165.26	173.19	180.88	203.02	189.58	NHP2 ribonucleoprotein
81567	TXNDC5	NM_001145549,NM_030810	157.87	174.06	143.85	194.01	122.1	84.9	86.78	80.66	97.46	86.4	thioredoxin domain containing 5
60681	FKBP10	NM_021939	136.21	173.7	177.32	186.18	198.8	35.49	36.69	36.52	38.66	37.65	FK506 binding protein 10
5499	PPP1CA	NM_001008709,NM_002708,NM_206873	148.25	173.69	159.18	165.67	135.9	238.8	257.42	259.91	275.16	249.65	protein phosphatase 1 catalytic subunit alpha
396	ARHGDIA	NM_001185077,NM_001185078,NM_001301240,NM_001301241,NM_001301242,NM_001301243,NM_004309	161.88	173.33	142.8	157.15	142.77	285.96	278.08	272.45	256.54	288.12	Rho GDP dissociation inhibitor alpha
65108	MARCKSL1	NM_023009	128.48	172.79	235.78	203.83	212.23	73.82	65.21	78.55	99.04	95.6	MARCKS like 1
3187	HNRNPH1	NM_001257293,NM_005520	231.56	172.75	156.02	176.07	129.49	224.31	222.9	223.72	241.08	221.94	heterogeneous nuclear ribonucleoprotein H1
64960	MRPS15	NM_031280	159.41	172.7	127.25	185.76	106.17	161.38	178.35	165.13	201.85	169.02	mitochondrial ribosomal protein S15
353	APRT	NM_000485,NM_001030018	140.49	172.6	146.34	165.75	122.06	140.26	135.56	144.78	153.82	142.77	adenine phosphoribosyltransferase
10412	NSA2	NM_001271665,NM_014886	193.76	171.63	155.08	180.48	127.78	127.45	139.2	129.07	143.94	129.92	NSA2, ribosome biogenesis homolog
6749	SSRP1	NM_003146	194.87	171.43	137.78	170.62	100.09	149.4	177.43	162.45	178.8	161.95	structure specific recognition protein 1
9601	PDIA4	NM_004911	136.68	171.34	171.49	179.27	141.77	145.99	206.01	186.96	226.56	177.75	protein disulfide isomerase family A member 4
9556	ATP5MPL	NM_001127393,NM_004894	156.19	170.99	142.65	190.21	117.86	106.32	109.36	109.25	129.82	111.86	ATP synthase membrane subunit 6.8PL
6574	SLC20A1	NM_005415	107.93	170.95	155.58	162.07	125.94	89.07	71.61	87.78	49.4	81.07	solute carrier family 20 member 1
1892	ECHS1	NM_004092	149.15	170.86	135.87	172.75	117.27	124.32	125.62	124.71	144.14	123.53	enoyl-CoA hydratase, short chain 1
7001	PRDX2	NM_005809	141.98	170.78	174.46	189.49	161.64	240.4	271.25	267.4	311.02	283.31	peroxiredoxin 2
5018	OXA1L	NM_005015	125.87	170.72	139.77	155.68	115.56	64.45	66.7	66.24	69.61	66.25	OXA1L, mitochondrial inner membrane protein
6923	ELOB	NM_007108,NM_207013	155.28	170.43	203.2	170.81	213.02	111.87	118.93	114.01	120.38	113.2	elongin B
824	CAPN2	NM_001146068,NM_001748	173.63	169.88	190.84	170.14	190.13	164.93	152.01	161.28	150.99	157.25	calpain 2
27316	RBMX	NM_001164803,NM_002139	209.31	169.75	149.98	167.24	97.97	175.87	190.19	164.63	174.8	162.04	RNA binding motif protein, X-linked
9377	COX5A	NM_004255	161.48	169.4	149.99	198.26	137.16	207.81	219.78	217.07	254.01	208.98	cytochrome c oxidase subunit 5A
6192	RPS4Y1	NM_001008	184.75	169.1	150.14	179.37	118.03	0	0	0.32	0	0.46	ribosomal protein S4, Y-linked 1
4953	ODC1	NM_001287188,NM_001287189,NM_001287190,NM_002539	246.92	168.64	111.92	179.85	132.54	97.27	80.47	80.39	97.16	79.57	ornithine decarboxylase 1
1975	EIF4B	NM_001300821,NM_001330654,NM_001417	157.03	168.19	132.92	142.46	95.41	190.56	230.71	191.64	215.69	191.42	eukaryotic translation initiation factor 4B
81853	TMEM14B	NM_001127711,NM_001286484,NM_001286488,NM_001286489,NM_030969	155.3	168.09	137.79	201.78	120.11	79.94	98.6	92.07	115.11	91.89	transmembrane protein 14B
522	ATP5PF	NM_001003696,NM_001003697,NM_001003701,NM_001003703,NM_001320266,NM_001320267,NM_001685	162.42	168.01	159.07	202.76	136.43	126.68	130.72	130.49	173.3	132.99	ATP synthase peripheral stalk subunit F6
8668	EIF3I	NM_003757	152.01	167.79	128.51	168.77	108.09	173.26	188.46	187.69	210.76	183.46	eukaryotic translation initiation factor 3 subunit I
84798	C19orf48	NM_001290149,NM_001290150,NM_001290151,NM_001290152,NM_001290153,NM_001290154,NM_001290155,NM_032712,NM_199249,NM_199250	159.34	167.49	131.85	128.52	108.03	88.71	85.67	77.77	81.02	80.33	chromosome 19 open reading frame 48
55353	LAPTM4B	NM_018407	168.92	167.46	159.63	191.94	137.16	98.74	110.93	117.83	129.48	115.2	lysosomal protein transmembrane 4 beta
51079	NDUFA13	NM_015965	139.47	166.72	186.82	174.99	181.36	154.39	146.14	164.13	174.29	174.46	NADH:ubiquinone oxidoreductase subunit A13
22919	MAPRE1	NM_012325	178.88	166.47	164.78	174.06	156.25	177.03	162.65	178.18	162.21	172.85	microtubule associated protein RP/EB family member 1
25912	C1orf43	NM_001098616,NM_001297717,NM_001297718,NM_001297720,NM_001297721,NM_001297723,NM_015449,NM_138740	162.67	166.23	176.47	159.39	218.87	149.73	139.13	151.78	137.56	156.05	chromosome 1 open reading frame 43
25824	PRDX5	NM_001358511,NM_001358516,NM_012094,NM_181651,NM_181652	127.43	166.11	188.34	168.67	216.28	213.19	168.35	221.56	185.9	225.8	peroxiredoxin 5
5518	PPP2R1A	NM_014225	162.58	165.88	157.88	166.51	158.88	114.8	120.34	118.36	112.8	112.91	protein phosphatase 2 scaffold subunit Aalpha
2879	GPX4	NM_001039847,NM_001039848,NM_002085	135.25	165.75	155.8	174.9	170.5	170.76	186.34	185.42	199.28	188.33	glutathione peroxidase 4
54407	SLC38A2	NM_001307936,NM_018976	140.93	165.28	217.74	151.2	226.36	88.88	86.82	88.8	72.33	88.11	solute carrier family 38 member 2
10318	TNIP1	NM_001252385,NM_001252386,NM_001252390,NM_001252391,NM_001252392,NM_001252393,NM_001258454,NM_001258455,NM_001258456,NM_006058	129.94	165.05	164.51	167.16	209.37	65.01	62.68	53.93	52.97	56.46	TNFAIP3 interacting protein 1
2171	FABP5	NM_001444	142.33	164.76	151.67	191.46	123.89	113.66	114.48	130.36	155.14	138.65	fatty acid binding protein 5
6576	SLC25A1	NM_001256534,NM_001287387,NM_005984	97.95	164.53	108.21	186.96	86.65	101.83	105.39	115.89	127.91	116.03	solute carrier family 25 member 1
3315	HSPB1	NM_001540	112.82	164.1	149.32	161.91	145.47	369.86	511.44	414.27	559.67	381.93	heat shock protein family B (small) member 1
1981	EIF4G1	NM_001194946,NM_001194947,NM_001291157,NM_004953,NM_182917,NM_198241,NM_198242,NM_198244	176.36	163.83	149.08	149.88	120.83	167.99	176.89	178.27	172.33	173.02	eukaryotic translation initiation factor 4 gamma 1
5704	PSMC4	NM_006503,NM_153001	150.78	163.24	212.76	161.39	228.56	132.34	104.41	123.96	111.1	124.26	proteasome 26S subunit, ATPase 4
754	PTTG1IP	NM_001286822,NM_004339	218.38	162.88	203.41	151.16	199.81	92	90.76	94.45	92.28	94.34	PTTG1 interacting protein
4715	NDUFB9	NM_001278645,NM_001278646,NM_001311168,NM_005005	164.26	162.81	140.21	172.05	145.38	237.99	243.86	261.84	290.78	261.5	NADH:ubiquinone oxidoreductase subunit B9
7417	VDAC2	NM_001184783,NM_001184823,NM_001324087,NM_001324088,NM_001324089,NM_001324090,NM_003375	177.61	162.66	148.38	186.73	138.07	166.94	158.47	170.49	179.39	169.75	voltage dependent anion channel 2
857	CAV1	NM_001172895,NM_001172896,NM_001172897,NM_001753	255.7	161.91	108.33	163.95	55.03	281.61	327.91	246.14	321.89	231.96	caveolin 1
4673	NAP1L1	NM_001307924,NM_001330231,NM_001330232,NM_004537,NM_139207	170.11	161.52	129.95	167.1	95.66	236.12	274.4	237.3	317.89	250.2	nucleosome assembly protein 1 like 1
5720	PSME1	NM_001281528,NM_001281529,NM_006263,NM_176783	123.12	161.52	201.85	176.37	198.4	142.34	152.67	152.47	181.75	153.49	proteasome activator subunit 1
10933	MORF4L1	NM_001265603,NM_001265604,NM_001265605,NM_006791,NM_206839	170.99	160.28	183.38	167.29	183.95	164.34	153.47	158.1	151.15	151.02	mortality factor 4 like 1
6636	SNRPF	NM_003095	166.71	160.1	132.59	185.36	93.18	131.69	153.61	137.76	179.82	128.8	small nuclear ribonucleoprotein polypeptide F
375	ARF1	NM_001024226,NM_001024227,NM_001024228,NM_001658	186.89	160.04	162.79	157.08	174.82	362.62	336.84	333.49	314.53	335.37	ADP ribosylation factor 1
2287	FKBP3	NM_002013	145.93	159.84	146.77	189.01	126.52	57.24	57.9	63.57	69.8	59.76	FK506 binding protein 3
476	ATP1A1	NM_000701,NM_001160233,NM_001160234	136.96	159.01	168.42	171.95	186.84	200.12	200.25	210.26	229.82	211.08	ATPase Na+/K+ transporting subunit alpha 1
9689	BZW1	NM_001207067,NM_001207068,NM_001207069,NM_001321688,NM_001321690,NM_001321691,NM_001321693,NM_001321694,NM_014670	219.54	158.76	142.62	156.05	152.21	204.3	169.27	179.5	162.24	168.63	basic leucine zipper and W2 domains 1
7430	EZR	NM_001111077,NM_003379	224.87	158.2	139.71	135.58	105.42	106.66	90.21	88.57	71.74	83.37	ezrin
7458	EIF4H	NM_022170,NM_031992	179.56	158.07	135.59	145.68	109.33	219.67	222.42	215.39	227.07	211.39	eukaryotic translation initiation factor 4H
1471	CST3	NM_000099,NM_001288614	106.94	158.06	324.34	156.56	486.14	446.72	228.86	388.55	238.73	432.03	cystatin C
5355	PLP2	NM_002668	178.14	157.8	160.3	171.89	159.19	239.24	262.89	240.76	288.49	258.87	proteolipid protein 2
4728	NDUFS8	NM_002496	129.31	157.09	148.35	152.47	141.41	230.07	230.09	244.02	240.78	258.24	NADH:ubiquinone oxidoreductase core subunit S8
55379	LRRC59	NM_018509	187.86	156.94	135.55	152.79	120.5	127.11	133.91	127.41	128.67	123.04	leucine rich repeat containing 59
5714	PSMD8	NM_002812	152.14	156.25	138.39	164.51	143.03	131.39	143.45	151.07	169.94	159.68	proteasome 26S subunit, non-ATPase 8
93621	MRFAP1	NM_001272053,NM_001272054,NM_033296	163.6	156.18	145.97	151.15	129.66	195.66	180.67	192.79	188.28	186.25	Morf4 family associated protein 1
9445	ITM2B	NM_021999	118.15	155.56	230.82	185.89	296.71	135.9	138.67	148.79	159.78	154.67	integral membrane protein 2B
9643	MORF4L2	NM_001142418,NM_001142419,NM_001142420,NM_001142421,NM_001142422,NM_001142423,NM_001142424,NM_001142425,NM_001142426,NM_001142427,NM_001142428,NM_001142429,NM_001142430,NM_001142431,NM_001142432,NM_012286	190.23	155.5	193.33	175.2	203.77	357.06	379.55	328.56	408.11	319.65	mortality factor 4 like 2
708	C1QBP	NM_001212	178.29	155.34	108.38	162.56	80.63	249.59	249.07	236.88	270.55	240.9	complement C1q binding protein
11145	PLA2G16	NM_001128203,NM_007069	176.09	154.96	164.76	156.35	139.57	50.08	39.96	47.77	40.21	47.37	phospholipase A2 group XVI
102288414	C11orf98	NM_001286086	194.2	154.51	139.86	131.76	107.77	149.31	160.39	157.57	145.5	149.56	chromosome 11 open reading frame 98
3184	HNRNPD	NM_001003810,NM_002138,NM_031369,NM_031370	160.13	154.49	110.2	158.77	74.66	207.07	227.03	207	203.95	198.18	heterogeneous nuclear ribonucleoprotein D
1029	CDKN2A	NM_000077,NM_001195132,NM_058195,NM_058197	115.02	153.99	156.17	144.08	163.38	16.82	8.54	13.91	8.91	12.1	cyclin dependent kinase inhibitor 2A
3107	HLA-C	NM_001243042,NM_002117	99.82	153.33	486.23	166.39	1222.75	258.43	252.28	314.6	312.34	361.4	major histocompatibility complex, class I, C
7277	TUBA4A	NM_001278552,NM_006000	114.76	153.17	128.96	175.75	111.93	84.32	107.86	106.05	143.64	104.41	tubulin alpha 4a
9555	H2AFY	NM_001040158,NM_004893,NM_138609,NM_138610	157.97	153.05	158.14	162.07	141.37	161.02	179.32	183.25	192.7	182.32	H2A histone family member Y
51330	TNFRSF12A	NM_016639	171.95	152.98	177.96	128.78	193.03	176.61	133.69	143.15	103.09	138.06	TNF receptor superfamily member 12A
10146	G3BP1	NM_005754,NM_198395	175.04	152.82	172.13	149.63	155	93.63	90.4	79.56	73.7	73.68	G3BP stress granule assembly factor 1
4522	MTHFD1	NM_005956	148.01	152.66	124.22	153.78	86.86	82.66	81.46	83.5	84.53	84.15	methylenetetrahydrofolate dehydrogenase, cyclohydrolase and formyltetrahydrofolate synthetase 1
10575	CCT4	NM_001256721,NM_006430	188.94	152.1	138.51	145.24	108.96	197.7	189.79	183.43	189.35	182.86	chaperonin containing TCP1 subunit 4
483	ATP1B3	NM_001679	132.95	152.04	173.95	161.39	179.13	213.57	187.49	211.8	213.11	207.12	ATPase Na+/K+ transporting subunit beta 3
1460	CSNK2B	NM_001282385,NM_001320	144.29	151.67	140.67	160.36	135.27	175.62	175.54	174.07	185.62	188.92	casein kinase 2 beta
9141	PDCD5	NM_004708	154.05	151.64	130.82	169.98	119.65	91.07	93.3	103.57	113.08	98.12	programmed cell death 5
10541	ANP32B	NM_006401	200.94	151.64	134.7	139.35	95.04	180.28	196.59	170.23	183.09	165.55	acidic nuclear phosphoprotein 32 family member B
10103	TSPAN1	NM_005727	115.02	151.34	136.84	170.93	105.13	7.43	8.17	9.14	8.97	6.03	tetraspanin 1
47	ACLY	NM_001096,NM_001303274,NM_001303275,NM_198830	146.92	151.26	126.62	152.52	93.58	80.01	71.31	82.14	72.78	83.02	ATP citrate lyase
1522	CTSZ	NM_001336	131.61	151.02	142.08	160.06	130.14	85.13	105.16	93.01	110.37	92.61	cathepsin Z
11282	MGAT4B	NM_014275,NM_054013	133.88	150.91	188.36	144.87	246.35	162.59	138.82	136.77	139.41	132.46	mannosyl (alpha-1,3-)-glycoprotein beta-1,4-N-acetylglucosaminyltransferase, isozyme B
5920	RARRES3	NM_004585	86.69	150.78	274.99	166.08	302.34	16.96	10.92	16.23	13.85	15.98	retinoic acid receptor responder 3
79180	EFHD2	NM_024329	143.21	150.6	144.09	140.4	133.79	79.04	92.68	74.25	84.93	72.93	EF-hand domain family member D2
7419	VDAC3	NM_001135694,NM_005662	139.91	150.58	120.01	179.53	87.88	156.43	174.43	177.75	197.63	178.28	voltage dependent anion channel 3
960	CD44	NM_000610,NM_001001389,NM_001001390,NM_001001391,NM_001001392,NM_001202555,NM_001202556,NM_001202557	167.71	150.41	175.7	150.1	180.59	367.8	330.14	364.63	314.76	355.42	CD44 molecule (Indian blood group)
10134	BCAP31	NM_001139441,NM_001139457,NM_001256447,NM_005745	158.79	150.4	154.59	156.75	170.03	239.47	251.66	257.41	288.77	250.57	B cell receptor associated protein 31
84833	ATP5MD	NM_001206426,NM_001206427,NM_032747	133.56	150.32	136.89	163.23	146.15	152.48	154.49	152.88	221.21	165.86	ATP synthase membrane subunit DAPIT
2014	EMP3	NM_001313905,NM_001425	124.45	150.28	230.51	176.36	307.52	143.51	128.05	127.63	140.65	133.12	epithelial membrane protein 3
27173	SLC39A1	NM_001271957,NM_001271958,NM_001271959,NM_001271960,NM_001271961,NM_014437	169.97	150.07	161.62	154	163.34	93.77	94.89	94.64	89.82	92.56	solute carrier family 39 member 1
991	CDC20	NM_001255	244.66	149.21	152.49	114.27	85.7	217.82	214.73	194.33	151.19	174.04	cell division cycle 20
7919	DDX39B	NM_004640,NM_080598	173.17	148.95	151.33	120.46	128.95	154.93	161.09	147.1	128.37	133.01	DExD-box helicase 39B
5834	PYGB	NM_002862	142.91	148.81	184	124.03	207.24	76.26	52.39	68.32	48.34	70.32	glycogen phosphorylase B
3146	HMGB1	NM_001313892,NM_001313893,NM_002128	179.13	148.65	134.71	159.78	84.37	190.2	200.15	202.68	229	190.81	high mobility group box 1
832	CAPZB	NM_001206540,NM_001206541,NM_001282162,NM_001313932,NM_004930	140.74	148.36	141.69	141.8	117.31	66.29	66.35	66.23	74.43	67.15	capping actin protein of muscle Z-line beta subunit
402	ARL2	NM_001199745,NM_001667	118.51	148.27	132.99	147.23	124.34	102.62	103.6	106.68	103.84	105.36	ADP ribosylation factor like GTPase 2
6427	SRSF2	NM_001195427,NM_003016	202.13	148.19	145.37	129.04	110.79	193.4	173.44	170.89	185.23	169.68	serine and arginine rich splicing factor 2
307	ANXA4	NM_001153,NM_001320698,NM_001320700,NM_001320702	126.44	148.01	184.9	150.88	170.58	188.57	150.29	186.63	166.1	177.9	annexin A4
4713	NDUFB7	NM_004146	118.14	147.77	143.88	138.27	131.41	123.44	123.35	127.98	120.54	124.38	NADH:ubiquinone oxidoreductase subunit B7
3185	HNRNPF	NM_001098204,NM_001098205,NM_001098206,NM_001098207,NM_001098208,NM_004966	161.58	147.63	153.56	142.82	134.02	166.47	185.29	149.62	158.12	138.09	heterogeneous nuclear ribonucleoprotein F
10528	NOP56	NM_006392	196.8	147.5	133.19	151.47	115.33	67.93	60.81	61.4	65.32	62.21	NOP56 ribonucleoprotein
11047	ADRM1	NM_001281437,NM_001281438,NM_007002,NM_175573	130.46	146.43	122.04	112.63	128.08	215.68	223.1	223.49	207.43	225.67	adhesion regulating molecule 1
4605	MYBL2	NM_001278610,NM_002466	167	146.21	126.53	138.91	92.47	110.76	126.9	110.22	120.32	113.35	MYB proto-oncogene like 2
7453	WARS	NM_004184,NM_173701,NM_213645,NM_213646	129.44	146.1	174.78	152	268.26	59.05	61.73	71.02	63.36	76.31	tryptophanyl-tRNA synthetase
59286	UBL5	NM_001048241,NM_024292	124.13	145.98	145.4	155.72	130.77	157.05	166.59	159.71	215.52	160.65	ubiquitin like 5
5695	PSMB7	NM_002799	157.69	145.95	142.46	139.08	138.33	179.9	176.3	188.61	187.57	185.03	proteasome subunit beta 7
652	BMP4	NM_001202,NM_001347912,NM_001347913,NM_001347914,NM_001347915,NM_001347916,NM_001347917,NM_130850,NM_130851	130.16	145.87	134.49	121.03	116.77	23.8	17.52	21.77	16.03	19.95	bone morphogenetic protein 4
3655	ITGA6	NM_000210,NM_001079818,NM_001316306	125.43	145.59	131.27	138.95	108.22	46.5	46.24	43.64	40.84	42.13	integrin subunit alpha 6
7307	U2AF1	NM_001025203,NM_001025204,NM_006758	147.94	145.29	123.06	143.86	87.14	97.76	99.44	90.15	100.11	86.95	U2 small nuclear RNA auxiliary factor 1
10961	ERP29	NM_001034025,NM_006817	121.75	144.96	122.04	165.58	120.68	75.45	84.63	83.01	95.06	85.93	endoplasmic reticulum protein 29
54985	HCFC1R1	NM_001002017,NM_001002018,NM_001288665,NM_001288666,NM_001288667,NM_001288668,NM_001308070,NM_017885	79.88	144.77	141.28	158.71	122.9	65.86	85.92	98.28	89.9	106.64	host cell factor C1 regulator 1
6624	FSCN1	NM_003088	142.49	144.47	136.73	139.2	136.65	101.1	109.49	121.73	112.55	118.36	fascin actin-bundling protein 1
5702	PSMC3	NM_002804	141.81	144.44	140.59	150.67	115.87	144.02	150.61	162.37	159.11	166.07	proteasome 26S subunit, ATPase 3
6241	RRM2	NM_001034,NM_001165931	130.51	144.14	109.01	176.76	85.92	124.88	108.34	157.74	111.25	163.4	ribonucleotide reductase regulatory subunit M2
93099	DMKN	NM_001035516,NM_001126056,NM_001126057,NM_001126058,NM_001126059,NM_001190347,NM_001190348,NM_001190349,NM_001308380,NM_001308383,NM_001352328,NM_001352329,NM_001352330,NM_001352331,NM_001352332,NM_033317	155.36	143.78	114.1	158.08	92.7	42.04	61.87	60.42	70.24	58.96	dermokine
100188893	TOMM6	NM_001134493	148.46	143.57	119.02	155.21	91.85	121.72	117.39	119.83	124.27	127.46	translocase of outer mitochondrial membrane 6
9403	SELENOF	NM_004261,NM_203341	157.98	143.41	152.38	172.2	164.9	134.11	138.4	147.59	166.49	144.48	selenoprotein F
7341	SUMO1	NM_001005781,NM_001005782,NM_003352	152.08	143.24	143.5	159.11	124.73	92.91	100.95	95.96	115.24	97.67	small ubiquitin-like modifier 1
79590	MRPL24	NM_024540,NM_145729	134.7	143.09	131.36	139.82	97.08	91.42	98.6	98.03	100.35	101.57	mitochondrial ribosomal protein L24
1495	CTNNA1	NM_001290307,NM_001290309,NM_001290310,NM_001290312,NM_001323982,NM_001323983,NM_001323984,NM_001323985,NM_001323986,NM_001323987,NM_001323988,NM_001323989,NM_001323990,NM_001323991,NM_001323992,NM_001323993,NM_001323994,NM_001323995,NM_001323996,NM_001323997,NM_001323998,NM_001323999,NM_001324000,NM_001324001,NM_001324002,NM_001324003,NM_001324004,NM_001324005,NM_001324006,NM_001324007,NM_001324…	166.18	143.07	154.29	147.84	150.53	138.17	142.52	148.45	139.82	144.25	catenin alpha 1
4144	MAT2A	NM_005911	176	142.16	158	149.61	153.62	207.11	155.94	188.93	154.15	179.75	methionine adenosyltransferase 2A
7150	TOP1	NM_003286	169.65	141.8	148.18	151.17	129.26	131.91	137.1	121.79	129.18	117.92	DNA topoisomerase I
7076	TIMP1	NM_003254	117.41	141.79	212.52	159.9	324.02	289.76	269.92	286.66	302	312.55	TIMP metallopeptidase inhibitor 1
401505	TOMM5	NM_001001790,NM_001134484,NM_001134485	166.76	141.47	131.3	156.82	117.79	188.54	181.13	200.61	201.44	198.32	translocase of outer mitochondrial membrane 5
10769	PLK2	NM_001252226,NM_006622	193.28	141.29	160.08	119.73	152.76	91.02	82.75	60.23	66.95	56.1	polo like kinase 2
7851	MALL	NM_005434	157.74	140.97	182.86	118.72	171.48	148.58	90.74	109.16	62.25	98.17	mal, T cell differentiation protein like
7879	RAB7A	NM_004637	156.85	140.73	149.14	141.2	186.69	181.2	165.06	171.61	162.32	168.53	RAB7A, member RAS oncogene family
53827	FXYD5	NM_001164605,NM_001320912,NM_001320913,NM_014164,NM_144779	127.2	140.12	147.5	152.38	156.78	272.18	279.05	282.68	319.04	287.19	FXYD domain containing ion transport regulator 5
54998	AURKAIP1	NM_001127229,NM_001127230,NM_017900	132.05	139.44	109.57	139.82	103.72	163.22	164.49	161.13	169.48	169.97	aurora kinase A interacting protein 1
9538	EI24	NM_001290135,NM_001330419,NM_004879	130.51	139.33	118.81	155.67	103.3	167.75	196.82	196.69	244.69	198.07	EI24, autophagy associated transmembrane protein
6386	SDCBP	NM_001007067,NM_001007068,NM_001007069,NM_001007070,NM_001330537,NM_001348339,NM_001348340,NM_001348341,NM_005625	117.04	139.29	169.55	152.21	254.08	141.17	139.94	154.53	170.1	156.53	syndecan binding protein
6742	SSBP1	NM_001256510,NM_001256511,NM_001256512,NM_001256513,NM_003143	162.87	138.75	121.16	158.49	95.21	233.86	248.72	235.36	249.95	257.28	single stranded DNA binding protein 1
10456	HAX1	NM_001018837,NM_006118	137.8	138.75	114.74	145.17	116.1	81.5	77.84	86.38	84.42	85.23	HCLS1 associated protein X-1
2286	FKBP2	NM_001135208,NM_004470,NM_057092	101.53	138.69	127.43	146.49	126.25	103.09	106.78	117.84	111.86	123.63	FK506 binding protein 2
191	AHCY	NM_000687,NM_001161766,NM_001322084,NM_001322085,NM_001322086	130.06	138.46	106.52	137.66	77.35	183.8	201.58	195.01	203.9	194.29	adenosylhomocysteinase
6372	CXCL6	NM_002993	67.44	138.25	154.19	125.17	85.06	0.07	0.1	0.17	0.31	0.44	C-X-C motif chemokine ligand 6
6421	SFPQ	NM_005066	168.89	138.17	120.22	132.93	84.05	148.98	145.9	141.27	147.91	136.54	splicing factor proline and glutamine rich
972	CD74	NM_001025158,NM_001025159,NM_004355	94.42	138.04	1130.48	155.31	1684.69	158.52	161.25	176.33	179.74	211.77	CD74 molecule
23478	SEC11A	NM_001271918,NM_001271919,NM_001271920,NM_001271921,NM_001271922,NM_014300	154.84	138.03	134.89	135.42	113.09	108.53	119.73	100.14	114.33	85.8	SEC11 homolog A, signal peptidase complex subunit
10856	RUVBL2	NM_001321190,NM_001321191,NM_006666	149.17	137.96	116.63	123.57	91.99	81.61	80.17	83.33	82.64	85.58	RuvB like AAA ATPase 2
11199	ANXA10	NM_007193	108.13	137.8	86.76	149.54	59.86	0.04	0	0.31	0.04	0.47	annexin A10
27242	TNFRSF21	NM_014452	133.58	137.77	125.72	125.01	123.67	103.94	94.06	79.74	85.59	89.84	TNF receptor superfamily member 21
11222	MRPL3	NM_007208	164.69	137.35	111.5	138.09	84.95	145.56	152.73	143.13	155.91	147.84	mitochondrial ribosomal protein L3
51522	TMEM14C	NM_001165258,NM_016462	125.56	136.94	128.27	160.32	125.81	87.93	90.64	90.63	105.32	87.26	transmembrane protein 14C
54498	SMOX	NM_001270691,NM_175839,NM_175840,NM_175841,NM_175842	133	136.19	136.82	129.78	127.67	36.1	31.16	36.56	26.62	41.62	spermine oxidase
9782	MATR3	NM_001194954,NM_001194955,NM_001194956,NM_001282278,NM_018834,NM_199189	112.2	136.16	118.82	155.65	106.44	93.25	108.12	109.09	122.64	111.2	matrin 3
11065	UBE2C	NM_001281741,NM_001281742,NM_007019,NM_181799,NM_181800,NM_181801	158.29	136.05	157.9	133.99	133.53	273.59	259.82	277.59	223.85	257.53	ubiquitin conjugating enzyme E2 C
3615	IMPDH2	NM_000884	169.72	135.77	104.02	136.37	78.63	128.97	155.47	131.86	177.42	139.05	inosine monophosphate dehydrogenase 2
6888	TALDO1	NM_006755	136.01	135.37	113.91	147.56	111.58	217.47	240.5	226.13	269.86	221.58	transaldolase 1
4190	MDH1	NM_001199111,NM_001199112,NM_001316374,NM_005917	129.96	135.2	135.65	159.72	118.87	100.4	96.19	108.74	112.59	107.17	malate dehydrogenase 1
6631	SNRPC	NM_003093	138.12	135.13	117.22	144.26	102.72	135.98	152.19	162.89	177.42	162.84	small nuclear ribonucleoprotein polypeptide C
2152	F3	NM_001178096,NM_001993	279.05	135.11	85.24	113.04	68.39	1.69	1.91	1.69	2.16	1.67	coagulation factor III, tissue factor
4714	NDUFB8	NM_001284367,NM_001284368,NM_005004	109.25	135.1	111.39	135.02	96.49	143.69	143.23	155.8	159.78	157.9	NADH:ubiquinone oxidoreductase subunit B8
8125	ANP32A	NM_006305	146.95	134.93	124.48	135.86	92.59	91.78	98.09	93.27	98.99	88.94	acidic nuclear phosphoprotein 32 family member A
10992	SF3B2	NM_006842	131	134.68	126.27	137.94	114.89	166.85	178.52	181.52	171.44	185.77	splicing factor 3b subunit 2
1537	CYC1	NM_001916	122.08	134.33	108.31	132.92	97.52	198.64	205.49	204.13	216.51	207.78	cytochrome c1
5538	PPT1	NM_000310,NM_001142604	135.1	134.1	114.7	156.89	108.04	67.12	73.02	71.38	91.34	74.49	palmitoyl-protein thioesterase 1
4694	NDUFA1	NM_004541	104.29	134.1	159.79	156.27	143.92	227.42	209.07	252.01	271.45	225.55	NADH:ubiquinone oxidoreductase subunit A1
51386	EIF3L	NM_001242923,NM_016091	125.8	133.92	101.4	128.67	86.35	110.74	118.18	110.83	137.84	110.99	eukaryotic translation initiation factor 3 subunit L
5270	SERPINE2	NM_001136528,NM_001136530,NM_006216	104.88	133.91	291.26	149.78	429.67	5.77	2.54	6.87	3.01	10.17	serpin family E member 2
10539	GLRX3	NM_001199868,NM_001321980,NM_006541	138.92	133.62	113.11	135.38	96.7	142.28	137.22	140.64	149.82	137.19	glutaredoxin 3
10598	AHSA1	NM_001321441,NM_012111	163.65	133.39	126.38	127.49	109.67	105.89	108.36	107.45	116.64	106.72	activator of HSP90 ATPase activity 1
6744	SSFA2	NM_001130445,NM_001287503,NM_001287504,NM_001287505,NM_006751	125.45	132.68	130.05	110.85	108.2	123.15	131.97	104.96	87.01	92.02	sperm specific antigen 2
6723	SRM	NM_003132	150.12	132.44	94.12	127.7	79.4	199.88	182.64	175.77	197.35	187.31	spermidine synthase
468	ATF4	NM_001675,NM_182810	170.98	132.1	148.57	102.78	215.96	122.63	122.05	102.96	74.1	102.26	activating transcription factor 4
1211	CLTA	NM_001076677,NM_001184760,NM_001184761,NM_001184762,NM_001311203,NM_001311204,NM_001311205,NM_001311206,NM_001833,NM_007096	137.63	131.9	125.01	146.51	115.08	204.56	203.99	201.14	217.82	195.06	clathrin light chain A
9741	LAPTM4A	NM_014713	120.97	131.86	177.19	148.69	197.74	112.66	102.93	107.89	115.25	114.44	lysosomal protein transmembrane 4 alpha
10519	CIB1	NM_001277764,NM_006384	109.43	131.83	140.41	139.83	146.09	116.85	119.41	130.46	152.99	137.09	calcium and integrin binding 1
5589	PRKCSH	NM_001001329,NM_001289102,NM_001289103,NM_001289104,NM_002743	107.81	131.71	128.42	132.83	125.21	95.98	123.87	98.36	122.04	101.66	protein kinase C substrate 80K-H
5694	PSMB6	NM_001270481,NM_002798	111.55	131.57	101.29	137.71	102.64	150.75	160.77	167.91	187.64	170.26	proteasome subunit beta 6
4779	NFE2L1	NM_001330261,NM_001330262,NM_003204	113.86	131.5	141.66	135.51	164.69	50.23	50.69	56.62	57.42	60.46	nuclear factor, erythroid 2 like 1
3895	KTN1	NM_001079521,NM_001079522,NM_001271014,NM_004986	157.34	131.42	120.13	135.96	94.91	71.2	79.31	74.08	82.12	74.06	kinectin 1
51218	GLRX5	NM_016417	123.73	131.22	128.56	139.82	107.84	67.89	73.07	75.65	86.87	79.9	glutaredoxin 5
2739	GLO1	NM_006708	141.19	131.01	109.88	148.2	94.97	132.3	144.98	148.72	168.13	146.16	glyoxalase I
1891	ECH1	NM_001398	95.36	130.61	144.94	135.63	132.62	142.88	126.1	157.02	142.29	186.42	enoyl-CoA hydratase 1
1075	CTSC	NM_001114173,NM_001814,NM_148170	116.92	130.49	166.34	139.06	218.91	189.1	154.24	202.44	178.93	219.46	cathepsin C
2806	GOT2	NM_001286220,NM_002080	130.53	130.37	115.45	142.12	90.2	134.92	146.83	145.43	151.5	139.85	glutamic-oxaloacetic transaminase 2
10899	JTB	NM_006694	115.38	130.25	117.74	124.5	113.67	94.65	97.8	100.21	102.88	94.18	jumping translocation breakpoint
8894	EIF2S2	NM_001316363,NM_001316364,NM_003908	145.11	130.11	117.95	151.13	107.63	161.94	171.48	170.59	186.85	166.2	eukaryotic translation initiation factor 2 subunit beta
1978	EIF4EBP1	NM_004095	102.91	130.11	110.69	130.78	110.05	203.68	213.54	228.61	216.8	231.36	eukaryotic translation initiation factor 4E binding protein 1
220988	HNRNPA3	NM_001330247,NM_001330248,NM_001330249,NM_001330250,NM_001330251,NM_194247	116.12	129.85	105.24	125.16	78.92	91.58	100.59	102.79	108.66	97.22	heterogeneous nuclear ribonucleoprotein A3
3735	KARS	NM_001130089,NM_005548	135.98	129.82	116.73	137	89.83	128.19	133.95	145.62	148.25	141.35	lysyl-tRNA synthetase
11331	PHB2	NM_001144831,NM_001267700	137.48	129.55	105.44	119.69	83.54	277.28	293.46	257.21	303.02	259.38	prohibitin 2
378	ARF4	NM_001660	125.68	129.43	133.86	157.07	145.95	158.56	161.47	166.75	197.55	179.97	ADP ribosylation factor 4
25996	REXO2	NM_015523	121.74	129.18	114.21	142.92	91.74	114.5	127.38	137.11	138.99	125.26	RNA exonuclease 2
7353	UFD1	NM_001035247,NM_005659	124.36	129.16	122.86	137.57	118.61	92.65	92.17	95.88	102.69	96.94	ubiquitin recognition factor in ER associated degradation 1
558	AXL	NM_001278599,NM_001699,NM_021913	178.38	128.95	114.08	135.19	87.43	88.71	97.13	70.42	98.04	74.4	AXL receptor tyrosine kinase
7913	DEK	NM_001134709,NM_003472	148.67	128.83	120.95	132.99	99.17	66.89	75.27	66.52	64.67	64.26	DEK proto-oncogene
11267	SNF8	NM_001317192,NM_001317193,NM_001317194,NM_007241	124.09	128.79	113.06	122.24	101.27	69.08	72.22	77.73	77.15	74.98	SNF8, ESCRT-II complex subunit
51639	SF3B6	NM_016047	125.19	128.44	118.25	141.26	115.76	115.15	120.12	117.11	133.6	107.86	splicing factor 3b subunit 6
140823	ROMO1	NM_080748	93.41	128.33	134.83	139.27	136.81	138.73	135.14	137.26	180.39	144.72	reactive oxygen species modulator 1
8061	FOSL1	NM_001300844,NM_001300855,NM_001300856,NM_001300857,NM_005438	214.77	127.87	130.77	124.25	121.09	401.67	265.84	329.43	243.04	328.54	FOS like 1, AP-1 transcription factor subunit
389	RHOC	NM_001042678,NM_001042679,NM_175744	129.31	127.82	134.93	122.89	155.35	151.44	140.6	158.37	150.96	163.93	ras homolog family member C
8665	EIF3F	NM_003754	126.87	127.79	95.59	128.4	80.99	181.19	205.51	173.21	221.83	180.15	eukaryotic translation initiation factor 3 subunit F
8683	SRSF9	NM_003769	127.74	127.68	117.71	122.17	105.17	114.09	115.21	115.12	129.1	104.46	serine and arginine rich splicing factor 9
84313	VPS25	NM_032353	113.93	127.58	111.65	131.49	112.57	94.09	87.08	93.32	82.15	91.24	vacuolar protein sorting 25 homolog
10097	ACTR2	NM_001005386,NM_005722	133.26	127.54	120.33	136.78	106.7	103.54	110.13	106.62	116.31	103.58	ARP2 actin related protein 2 homolog
51258	MRPL51	NM_016497	133.28	127.42	124.92	147.19	96.68	285.53	296.73	303.55	332.46	295.88	mitochondrial ribosomal protein L51
5226	PGD	NM_001304451,NM_001304452,NM_002631	114.7	127.23	121.75	134.28	118.72	123.18	121.08	125.02	137.92	128.4	phosphogluconate dehydrogenase
79022	TMEM106C	NM_001143841,NM_001143842,NM_001143843,NM_024056	95.08	127.23	104.73	159.79	78.66	178.04	192.31	215.77	232.77	210.23	transmembrane protein 106C
5425	POLD2	NM_001127218,NM_001256879,NM_006230	112.12	127.09	100.36	128.21	78.03	113.92	124.4	124.88	141.46	125.36	DNA polymerase delta 2, accessory subunit
28958	COA3	NM_001040431	102.12	127.08	124.54	146.28	108.22	71.41	68.94	71.76	76.56	75.81	cytochrome c oxidase assembly factor 3
23480	SEC61G	NM_001012456,NM_014302	146.49	127.06	121.98	139.33	99.44	127.58	135.77	145.2	157.22	134.51	Sec61 translocon gamma subunit
5436	POLR2G	NM_002696	127.24	126.72	117.43	143.12	94.42	90.99	99.72	100.16	113.2	99.48	RNA polymerase II subunit G
166	AES	NM_001130,NM_198969,NM_198970	98.19	126.7	138.09	126.06	150.28	174.52	189.44	175.22	198.38	181.35	amino-terminal enhancer of split
11140	CDC37	NM_007065	131.57	126.42	115.84	130.44	112.61	130.47	129.33	132.41	144.97	136.11	cell division cycle 37
1611	DAP	NM_001291963,NM_004394	128.74	126.34	181.54	108.9	186.83	105.38	93.45	91.84	91.98	91.71	death associated protein
8872	CDC123	NM_006023	150.44	126.22	114.93	125.65	100.47	134.9	130.36	126.43	127.72	124.02	cell division cycle 123
81502	HM13	NM_030789,NM_178580,NM_178581,NM_178582	132.25	126.21	128.82	130.71	144.35	171.03	181.85	177.78	189.33	182.38	histocompatibility minor 13
4716	NDUFB10	NM_004548	113.22	126.16	118.42	140.76	105.43	109.33	112.53	114.46	132.88	118.52	NADH:ubiquinone oxidoreductase subunit B10
5768	QSOX1	NM_001004128,NM_002826	116.88	126.12	101.68	119.99	111.19	35.57	40.51	35.11	42.04	40.78	quiescin sulfhydryl oxidase 1
831	CAST	NM_001042440,NM_001042441,NM_001042442,NM_001042443,NM_001042444,NM_001042445,NM_001042446,NM_001190442,NM_001284212,NM_001284213,NM_001330626,NM_001330627,NM_001330628,NM_001330629,NM_001330630,NM_001330631,NM_001330632,NM_001330633,NM_001330634,NM_001750,NM_173060	126.81	126.01	108.6	133.69	86.8	68.14	73.19	80.28	73.82	84.49	calpastatin
10175	CNIH1	NM_005776	156.69	125.97	127.48	130.87	123.31	60.54	59.38	59.21	64.38	60.09	cornichon family AMPA receptor auxiliary protein 1
6741	SSB	NM_001294145,NM_003142	133.03	125.85	111.63	139.49	92.49	102.03	108.02	112.7	122.61	114.04	Sjogren syndrome antigen B
6558	SLC12A2	NM_001046,NM_001256461	92.96	125.76	122.23	108.35	85.33	6.05	6.65	6.94	6.53	6.7	solute carrier family 12 member 2
6638	SNRPN	NM_001349454,NM_001349455,NM_001349456,NM_001349457,NM_001349458,NM_001349459,NM_001349460,NM_001349461,NM_001349462,NM_001349463,NM_001349464,NM_001349465,NM_003097,NM_022805,NM_022806,NM_022807,NM_022808	103.98	125.7	120.52	119.84	120.98	47.49	44.84	48.91	51.68	45.34	small nuclear ribonucleoprotein polypeptide N
6392	SDHD	NM_001276503,NM_001276504,NM_001276506,NM_003002	119.41	125.64	122.35	139.01	117.81	118.5	135.96	129.31	153.03	134.24	succinate dehydrogenase complex subunit D
5496	PPM1G	NM_177983	141.36	125.62	104.43	125.3	83.43	122.59	115.87	109.63	125.43	109.34	protein phosphatase, Mg2+/Mn2+ dependent 1G
2274	FHL2	NM_001039492,NM_001318894,NM_001318895,NM_001318896,NM_001318897,NM_001318898,NM_001318899,NM_001450,NM_201555,NM_201557	125.93	125.38	131.8	125.54	141.36	62.4	40.23	55.57	35.91	57.93	four and a half LIM domains 2
1718	DHCR24	NM_014762	126.82	125.15	89.56	131.52	54.31	120.96	127.21	129.05	122.54	124.01	24-dehydrocholesterol reductase
8662	EIF3B	NM_001037283,NM_003751	137.55	125.15	106.16	105.81	87.54	137.18	138.76	130.98	144.17	136.78	eukaryotic translation initiation factor 3 subunit B
51372	TMA7	NM_001329417,NM_015933	113.34	125.07	110.24	144.44	87.35	119.23	123.44	122.4	159.96	121.48	translation machinery associated 7 homolog
6950	TCP1	NM_001008897,NM_030752	159.05	125	116.14	124.38	88.57	179.48	184.87	190.38	203.74	189.82	t-complex 1
27063	ANKRD1	NM_014391	328.54	124.71	108.93	118.14	85.83	0.75	1.01	1.28	0.63	1.09	ankyrin repeat domain 1
10055	SAE1	NM_001145713,NM_001145714,NM_005500	133.93	124.62	128.6	122.9	120.53	97.72	97.62	99.64	101.37	97.84	SUMO1 activating enzyme subunit 1
5066	PAM	NM_000919,NM_001177306,NM_001319943,NM_138766,NM_138821,NM_138822	91.82	124.6	145.34	137.15	89.86	23.77	22.86	25.26	25.62	27.15	peptidylglycine alpha-amidating monooxygenase
2222	FDFT1	NM_001287742,NM_001287743,NM_001287744,NM_001287745,NM_001287747,NM_001287748,NM_001287749,NM_001287750,NM_001287751,NM_001287756,NM_004462	83.31	124.34	91.8	136.26	57.98	86.06	93.42	93.08	105.6	90.76	farnesyl-diphosphate farnesyltransferase 1
11335	CBX3	NM_007276,NM_016587	153.71	124.32	119.31	134.06	89.83	129.08	135.2	116.89	129.27	110.51	chromobox 3
51075	TMX2	NM_001144012,NM_001347890,NM_001347891,NM_001347892,NM_001347893,NM_001347894,NM_001347895,NM_001347896,NM_001347898,NM_015959	145.02	123.86	134.42	126.72	129.04	105.15	89.4	94.38	91.03	97.49	thioredoxin related transmembrane protein 2
54458	PRR13	NM_001005354,NM_018457	122.31	123.31	109.91	148.94	116.61	219.3	223.47	250.21	269.91	249.4	proline rich 13
79002	TRIR	NM_001329738,NM_001329739,NM_024038	104.31	123.3	107.24	126.36	103.15	134.87	144.59	138.77	134.23	146.8	telomerase RNA component interacting RNase
11161	ERG28	NM_007176	90.45	122.99	114.06	141.3	88.95	37.06	40.19	43.01	53.34	41.9	ergosterol biosynthesis 28 homolog
55967	NDUFA12	NM_001258338,NM_018838	113.12	122.42	109.65	150.71	101.1	116.29	125.27	128.65	144.87	120.57	NADH:ubiquinone oxidoreductase subunit A12
746	TMEM258	NM_014206	111.61	122.34	109.04	137.43	91.23	107.33	122.01	111.5	134.19	98.5	transmembrane protein 258
128866	CHMP4B	NM_176812	122.25	121.9	136.08	119.77	134.46	162.42	162.57	162.5	173.28	160.95	charged multivesicular body protein 4B
7153	TOP2A	NM_001067	121.31	121.87	140.49	134.53	89.95	86.28	96.63	107.96	91.58	107.67	DNA topoisomerase II alpha
10205	MPZL2	NM_005797,NM_144765	107.31	121.63	205.65	153.94	221.47	4.1	8.91	6.68	12.1	4.28	myelin protein zero like 2
471	ATIC	NM_004044	124.96	121.5	105.55	120.1	75.04	96.8	102.61	100.5	105.66	102.5	5-aminoimidazole-4-carboxamide ribonucleotide formyltransferase/IMP cyclohydrolase
1209	CLPTM1	NM_001282175,NM_001282176,NM_001294	104.52	120.89	119.88	123.93	137.27	78.35	75.71	79.35	76.23	80.2	CLPTM1, transmembrane protein
11163	NUDT4	NM_001301022,NM_001301023,NM_001301024,NM_019094,NM_199040	137.33	120.68	128.5	112.86	135.99	17.68	17.93	18.2	19.34	19.56	nudix hydrolase 4
4711	NDUFB5	NM_001199957,NM_001199958,NM_002492	107.47	120.65	111.79	139.58	107.78	101.51	107.18	109.57	125.95	109.59	NADH:ubiquinone oxidoreductase subunit B5
10628	TXNIP	NM_001313972,NM_006472	72.56	120.65	136.73	156.93	262.4	13.79	21.22	25.65	23.45	28.44	thioredoxin interacting protein
11098	PRSS23	NM_001293178,NM_001293179,NM_001293180,NM_007173	142.78	120.59	103.94	133.76	65.91	150.41	196.56	141.28	193.59	137.72	protease, serine 23
7083	TK1	NM_001346663,NM_003258	98.28	120.55	94.2	124.04	71.85	78.94	97.33	94.46	117.68	95.19	thymidine kinase 1
3069	HDLBP	NM_001243900,NM_001320965,NM_001320966,NM_001320967,NM_005336,NM_203346	119.86	120.26	101.61	119.18	92.92	98.89	109.11	110.09	105.92	109.73	high density lipoprotein binding protein
10452	TOMM40	NM_001128916,NM_001128917,NM_006114	157.81	120.06	93.9	114.53	78.16	106.9	97.34	86.08	87.67	86.51	translocase of outer mitochondrial membrane 40
6917	TCEA1	NM_006756,NM_201437	145.68	119.78	140.85	123.86	132.42	90.66	90.27	93.42	92.07	92.14	transcription elongation factor A1
5682	PSMA1	NM_001143937,NM_002786,NM_148976	127.48	119.71	107.79	121.86	101.95	220.4	219.62	225.05	234.43	221.11	proteasome subunit alpha 1
51253	MRPL37	NM_001330602,NM_016491	115.39	119.43	96.09	123.31	81.85	149.01	153	146.76	155.01	149.16	mitochondrial ribosomal protein L37
9246	UBE2L6	NM_004223,NM_198183	71.45	119.28	178.98	121.41	267.43	47.48	46.34	61.97	50.71	64.23	ubiquitin conjugating enzyme E2 L6
9124	PDLIM1	NM_020992	102.81	119.01	102.12	130.26	103.45	46.8	46.36	48.69	51.52	54.11	PDZ and LIM domain 1
3703	STT3A	NM_001278503,NM_001278504,NM_152713	115.93	118.95	117.95	130.28	109.64	110.87	117.89	122.66	124.69	121.47	STT3A, catalytic subunit of the oligosaccharyltransferase complex
6157	RPL27A	NM_000990	113.86	118.89	92.13	116.89	69.91	209.34	230.06	215.37	244.79	215.91	ribosomal protein L27a
10525	HYOU1	NM_001130991,NM_006389	120.63	118.67	129.22	115.81	139.95	83.63	93.52	94.7	98.19	94.31	hypoxia up-regulated 1
3838	KPNA2	NM_001320611,NM_002266	163.6	118.55	150.84	114.52	93.75	192.19	174.82	181.98	168.81	178.29	karyopherin subunit alpha 2
977	CD151	NM_001039490,NM_004357,NM_139029,NM_139030	104.35	118.45	119.37	117.51	152.84	205.08	182.53	190.53	203.88	199.57	CD151 molecule (Raph blood group)
3576	CXCL8	NM_000584,NM_001354840	113.33	118.24	113.75	105.61	186.27	2.03	0.3	2.4	0.47	5.12	C-X-C motif chemokine ligand 8
4048	LTA4H	NM_000895,NM_001256643,NM_001256644	98.53	118.21	95.4	135.38	78.95	83.62	89.03	93.5	104.97	92.82	leukotriene A4 hydrolase
6390	SDHB	NM_003000	116.6	118.16	100.03	124.04	96.27	59.71	59.64	65.32	67.51	69.19	succinate dehydrogenase complex iron sulfur subunit B
3916	LAMP1	NM_005561	103.8	117.97	112.83	128.76	135.98	138.21	146.66	149.41	159.95	141.26	lysosomal associated membrane protein 1
4670	HNRNPM	NM_001297418,NM_005968,NM_031203	117.76	117.94	107.02	116.28	80.74	102.55	116.71	104.94	116.83	101.03	heterogeneous nuclear ribonucleoprotein M
3301	DNAJA1	NM_001314039,NM_001539	137.22	117.74	131.59	115.66	132.19	189.41	191.5	195.05	202.57	191.59	DnaJ heat shock protein family (Hsp40) member A1
23741	EID1	NM_014335	117.29	117.69	149.13	124.27	135.3	74.72	70.21	81.32	73.2	83.41	EP300 interacting inhibitor of differentiation 1
2821	GPI	NM_000175,NM_001184722,NM_001289789,NM_001289790,NM_001329909,NM_001329910,NM_001329911	110.51	117.5	86.16	117.3	70.92	68.71	75.44	74.35	79.31	72.77	glucose-6-phosphate isomerase
80097	MZT2B	NM_001330282,NM_001330284,NM_025029	88.21	117.43	88.23	104.11	74.7	97.2	93.95	94.36	101.8	91.65	mitotic spindle organizing protein 2B
51192	CKLF	NM_001040138,NM_016326,NM_016951,NM_181640,NM_181641	91.45	117.32	124.91	130.2	121.34	72.89	61.71	77.3	76.01	75	chemokine like factor
595	CCND1	NM_053056	174.54	117.29	127.38	92.74	140.76	183.31	139.87	150.68	125.08	156.45	cyclin D1
10493	VAT1	NM_006373	79.02	117.28	126.84	125.84	173.32	46.55	33.47	42.3	33.09	45.86	vesicle amine transport 1
9898	UBAP2L	NM_001127320,NM_001287815,NM_001287816,NM_001330730,NM_014847	138.07	117.21	116.39	114.39	106.37	104.19	103.97	104.56	97.86	102.33	ubiquitin associated protein 2 like
5358	PLS3	NM_001136025,NM_001172335,NM_001282337,NM_001282338,NM_005032	139.2	117.06	128.58	130.6	125.57	113.69	108.73	115.91	125.61	114.15	plastin 3
3065	HDAC1	NM_004964	124.27	116.97	117.02	119.75	106.3	101.28	109.37	100.39	112.54	94.63	histone deacetylase 1
5997	RGS2	NM_002923	128.52	116.84	160.5	112.69	121.33	26.88	29.39	32.04	39.89	32.69	regulator of G protein signaling 2
11100	HNRNPUL1	NM_001301016,NM_001321208,NM_001321211,NM_007040,NM_144732	113.25	116.58	103.06	115.99	90.34	124.7	129.27	120.7	111.34	123.86	heterogeneous nuclear ribonucleoprotein U like 1
57136	APMAP	NM_020531	115.06	116.45	123.66	124.7	123.1	36.54	29.33	37.18	33.2	37.11	adipocyte plasma membrane associated protein
22826	DNAJC8	NM_014280	120.18	116.32	110.36	139.06	98.48	65.63	69.45	70.33	76.71	71.64	DnaJ heat shock protein family (Hsp40) member C8
6464	SHC1	NM_001130040,NM_001130041,NM_001202859,NM_003029,NM_183001	136.21	115.86	157.65	112.29	170.21	175.05	187	156.3	169.82	153.76	SHC adaptor protein 1
1717	DHCR7	NM_001163817,NM_001360	89.13	115.77	91.43	128.22	73.13	94.1	100.55	99.57	113.63	96.76	7-dehydrocholesterol reductase
9260	PDLIM7	NM_005451,NM_203352,NM_213636	96.72	115.33	122.03	122.08	147.45	62.2	67.48	74.54	71.35	80.23	PDZ and LIM domain 7
26509	MYOF	NM_013451,NM_133337	163.34	115.31	120.6	105.42	77.8	61	65.15	61.45	62.18	61.37	myoferlin
51234	EMC4	NM_001286420,NM_001351373,NM_016454	122.67	114.95	111.85	130.46	107.53	102.05	108.23	107.41	118.8	105.44	ER membrane protein complex subunit 4
10135	NAMPT	NM_005746	86.53	114.9	132.8	121.74	163.21	28.9	25.79	33.16	26.11	35.31	nicotinamide phosphoribosyltransferase
8892	EIF2B2	NM_014239	108.69	114.81	101.28	121.66	93.26	56.47	60.57	51.75	61.84	51.52	eukaryotic translation initiation factor 2B subunit beta
3192	HNRNPU	NM_004501,NM_031844	134.61	114.57	104.61	125.92	79.07	144.67	155.91	155.78	166.82	153.87	heterogeneous nuclear ribonucleoprotein U
51287	COA4	NM_016565	105.36	114.23	104.87	121.73	98.26	153.31	137.46	161.26	144.4	152.39	cytochrome c oxidase assembly factor 4 homolog
4478	MSN	NM_002444	101.2	113.98	110.98	118.06	112.15	209.14	220.41	215.53	235.64	227.32	moesin
6284	S100A13	NM_001024210,NM_001024211,NM_001024212,NM_001024213,NM_005979	100.91	113.84	165.92	117.93	177.09	127.83	104.52	117.99	123.71	124.53	S100 calcium binding protein A13
440400	RNASEK	NM_001004333	88.45	113.71	116.26	108.81	127.6	160.3	138.9	148.98	140.66	158.01	ribonuclease K
5214	PFKP	NM_001242339,NM_001323067,NM_001323068,NM_001323069,NM_001323070,NM_001323071,NM_001323072,NM_001323073,NM_001323074,NM_001345944,NM_002627	150.33	113.59	103.79	90.15	89.93	155.66	145.6	133.21	132.58	142.91	phosphofructokinase, platelet
27131	SNX5	NM_001282454,NM_014426,NM_152227	157.78	113.54	96.67	92.32	67.22	40.37	37.39	37	38.1	36.32	sorting nexin 5
58485	TRAPPC1	NM_001166621,NM_021210	95.33	113.26	106.62	115.81	93.65	110.35	105.91	116.86	107.93	119.85	trafficking protein particle complex 1
3308	HSPA4	NM_002154	141.5	113.2	103.31	110.22	81.24	98.28	100.58	100.48	103.31	93.26	heat shock protein family A (Hsp70) member 4
5706	PSMC6	NM_002806	123.29	113.06	107.5	121.45	99.84	64.77	66.59	66.14	67.81	64.48	proteasome 26S subunit, ATPase 6
11198	SUPT16H	NM_007192	118.97	112.71	94.94	120.8	70.27	56.34	61.49	56.36	60.57	57.89	SPT16 homolog, facilitates chromatin remodeling subunit
3992	FADS1	NM_013402	86.34	112.65	96.5	117.86	61.85	72.07	72.23	82.2	69.11	85.11	fatty acid desaturase 1
8318	CDC45	NM_001178010,NM_001178011,NM_003504	116.87	112.17	86.35	91.65	60.91	40.43	44.75	44.83	47.66	50.54	cell division cycle 45
9948	WDR1	NM_005112,NM_017491	125.44	112.15	117.36	109.84	118.43	130.99	121.45	125.79	120.99	128.5	WD repeat domain 1
92579	G6PC3	NM_001319945,NM_138387	88.66	112.02	106.66	121.25	102.72	84.29	79.77	81.9	88.92	90.37	glucose-6-phosphatase catalytic subunit 3
65003	MRPL11	NM_016050,NM_170738,NM_170739	106.27	111.88	78.03	114.05	60.68	97.26	114.35	108.88	124.74	101.87	mitochondrial ribosomal protein L11
6605	SMARCE1	NM_003079	105.93	111.81	117.07	120.08	103.36	84.72	89.6	82.31	91.61	85.69	SWI/SNF related, matrix associated, actin dependent regulator of chromatin, subfamily e, member 1
57062	DDX24	NM_020414	125.85	111.81	119.83	112.74	123.49	71.37	64.47	67.94	63.06	67.23	DEAD-box helicase 24
10969	EBNA1BP2	NM_001159936,NM_006824	152.43	111.52	86.61	114.93	69.47	159.87	191.89	129.46	215.4	135.25	EBNA1 binding protein 2
7266	DNAJC7	NM_001144766,NM_003315	126.8	111.51	111.12	114.6	95.66	72.43	76.23	70.68	72.7	72.69	DnaJ heat shock protein family (Hsp40) member C7
23770	FKBP8	NM_001308373,NM_012181	85.5	111.34	96.59	113.5	115.78	98.7	103.51	104.37	114.15	106.75	FK506 binding protein 8
5829	PXN	NM_001080855,NM_001243756,NM_002859,NM_025157	99.44	111.21	114.93	107.63	115.99	99.27	90.01	103.51	81.35	105.31	paxillin
2771	GNAI2	NM_001166425,NM_001282617,NM_001282618,NM_001282619,NM_001282620,NM_002070	96.6	111.19	104.24	112.81	112.07	106.69	110.43	109.33	118.4	114.06	G protein subunit alpha i2
79143	MBOAT7	NM_001146056,NM_001146082,NM_001146083,NM_024298	94.97	111.11	115.52	114.22	121.02	48.84	46.06	51.66	44.06	50.27	membrane bound O-acyltransferase domain containing 7
23089	PEG10	NM_001040152,NM_001172437,NM_001172438,NM_001184961,NM_001184962,NM_015068	119.64	111.07	82.77	113.46	60.81	31.48	41.97	48.48	55.3	52.59	paternally expressed 10
3420	IDH3B	NM_001258384,NM_001330763,NM_006899,NM_174855	101.69	111.06	97.58	120.48	91.61	43.79	45.71	44.33	47	48.18	isocitrate dehydrogenase 3 (NAD(+)) beta
51726	DNAJB11	NM_016306	137.78	110.99	133.04	118.34	130.73	72.65	75.9	70.72	73.76	69.95	DnaJ heat shock protein family (Hsp40) member B11
10419	PRMT5	NM_001039619,NM_001282953,NM_001282954,NM_001282955,NM_001282956,NM_006109	118.71	110.82	101.56	114.17	77.6	57.81	59.54	59.52	61.58	59.78	protein arginine methyltransferase 5
10430	TMEM147	NM_001242597,NM_001242598,NM_032635	96.17	109.94	95.44	115.49	87.03	68.61	76.53	71.6	87.37	80.16	transmembrane protein 147
207	AKT1	NM_001014431,NM_001014432,NM_005163	108.42	109.9	105.22	99	96.19	76.34	78.91	79.11	83.29	79.5	AKT serine/threonine kinase 1
64951	MRPS24	NM_032014	94.75	109.78	90.62	119.69	87.8	121.57	135.98	135.84	168.74	149.45	mitochondrial ribosomal protein S24
22818	COPZ1	NM_001271734,NM_001271735,NM_001271736,NM_016057	99.93	109.7	109.86	130.15	95.15	170.16	173.46	186.36	191.39	189.53	coatomer protein complex subunit zeta 1
29058	TMEM230	NM_001009923,NM_001009924,NM_001009925,NM_001330984,NM_001330985,NM_001330986,NM_001330987,NM_014145	91.06	109.66	140.74	118.7	155.62	46.67	43.4	55.13	54.68	59.72	transmembrane protein 230
9040	UBE2M	NM_003969	100.7	109.57	87.41	110.45	90.54	55.92	43.6	50.69	45.46	52.97	ubiquitin conjugating enzyme E2 M
29997	NOP53	NM_015710	91	109.49	90.4	95.54	79.24	85.55	109.06	82.88	98.47	86.07	NOP53 ribosome biogenesis factor
10381	TUBB3	NM_001197181,NM_006086	117.25	109.24	121.6	111	127.63	42.82	45.5	43.71	54.35	40.24	tubulin beta 3 class III
9184	BUB3	NM_001007793,NM_004725	102.41	109.23	107.26	113.76	97.66	115.05	108.66	117.8	104.63	110.55	BUB3, mitotic checkpoint protein
10951	CBX1	NM_001127228,NM_006807	117.79	109.06	100.81	116.57	81.63	55.14	61.56	61.59	66.03	59.46	chromobox 1
7165	TPD52L2	NM_001243891,NM_001243892,NM_001243894,NM_001243895,NM_003288,NM_199359,NM_199360,NM_199361,NM_199362,NM_199363	119.94	108.86	105.38	106.6	109.03	122.74	126.37	118.4	136.84	121.5	tumor protein D52 like 2
3021	H3F3B	NM_005324	141.31	108.72	108.19	103.09	111.62	119.95	98.61	89.35	89.08	91.56	H3 histone family member 3B
7812	CSDE1	NM_001007553,NM_001130523,NM_001242891,NM_001242892,NM_001242893,NM_007158	119.42	108.72	111.72	115.35	104.34	200.73	201.75	209.98	212.21	211.99	cold shock domain containing E1
1743	DLST	NM_001244883,NM_001933	102.1	108.71	93.98	122.88	91.18	52.8	55.04	55.99	57.19	59.01	dihydrolipoamide S-succinyltransferase
6510	SLC1A5	NM_001145144,NM_001145145,NM_005628	157.81	108.31	107.74	97.56	119.19	65.12	67.44	58.02	66.83	57.27	solute carrier family 1 member 5
3491	CYR61	NM_001554	176.43	108.22	94.96	94.18	83.47	58.07	40.41	35.17	44.2	39.2	cysteine rich angiogenic inducer 61
9158	FIBP	NM_004214,NM_198897	92.91	108.05	116.41	105.26	102.26	136.87	128.13	124.32	140.21	137.98	FGF1 intracellular binding protein
2237	FEN1	NM_004111	88.59	108.03	95.89	133.19	74.99	75.32	86.33	83.22	99.19	85.73	flap structure-specific endonuclease 1
10276	NET1	NM_001047160,NM_005863	97.05	108	135.14	95.79	129.9	81.07	63.13	66.23	44.67	63.28	neuroepithelial cell transforming 1
65993	MRPS34	NM_001300900,NM_023936	92.36	107.89	84.65	100.75	73.68	89.07	92.67	87.75	93.55	85.38	mitochondrial ribosomal protein S34
27258	LSM3	NM_014463	102.14	107.89	88.16	129.24	68.31	105.15	120.89	130.35	150.48	128.26	LSM3 homolog, U6 small nuclear RNA and mRNA degradation associated
10972	TMED10	NM_006827	115.48	107.85	118.91	115.19	128.96	51.78	51.4	48.95	51.08	47.7	transmembrane p24 trafficking protein 10
475	ATOX1	NM_004045	83.13	107.62	138.11	124.24	165.48	95.05	93.65	99.6	115.16	107.6	antioxidant 1 copper chaperone
5908	RAP1B	NM_001010942,NM_001251917,NM_001251918,NM_001251921,NM_001251922,NM_015646	140.49	107.3	124.11	115.91	131.08	102.13	90.88	100.19	89.95	101.39	RAP1B, member of RAS oncogene family
11337	GABARAP	NM_007278	87.98	107.06	144.3	132.7	164.67	152.84	133.91	147.03	143.36	151.88	GABA type A receptor-associated protein
83443	SF3B5	NM_031287	93.8	107.03	108.28	111.94	83.84	116.81	113.84	120.19	133.26	131.07	splicing factor 3b subunit 5
400916	CHCHD10	NM_001301339,NM_213720	90.2	106.99	74.22	108.06	74.79	151.94	159.34	160.67	161.66	155.83	coiled-coil-helix-coiled-coil-helix domain containing 10
871	SERPINH1	NM_001207014,NM_001235	138.44	106.88	133.75	91.54	153.11	111.49	136.52	114.22	121.41	105.26	serpin family H member 1
29101	SSU72	NM_014188	119.29	106.77	112.51	64.01	96.75	116.94	118.85	113.88	122.88	117.92	SSU72 homolog, RNA polymerase II CTD phosphatase
51604	PIGT	NM_001184728,NM_001184729,NM_001184730,NM_015937	82.72	106.68	135.04	114.79	165.16	99.62	98.82	112.92	119.23	121.23	phosphatidylinositol glycan anchor biosynthesis class T
8721	EDF1	NM_001281297,NM_001281298,NM_001281299,NM_003792,NM_153200	117.16	106.67	123.68	99.21	119.23	178.98	165.17	170.8	196.93	178.26	endothelial differentiation related factor 1
4170	MCL1	NM_001197320,NM_021960,NM_182763	138.85	106.36	156.46	106.75	189.35	74.84	56.9	61.02	51.27	61.07	MCL1, BCL2 family apoptosis regulator
55299	BRIX1	NM_018321	122.45	106.29	98.2	108.74	80.46	74	59.46	66.56	59.52	61.75	BRX1, biogenesis of ribosomes
8519	IFITM1	NM_003641	39.14	106.23	416.07	118.52	744.4	56.28	56.7	78.41	65.34	89.43	interferon induced transmembrane protein 1
7262	PHLDA2	NM_003311	92.07	106.22	84.33	116.99	93.86	143.91	136.28	192.48	209.53	201.8	pleckstrin homology like domain family A member 2
515	ATP5PB	NM_001688	106.27	106.21	100.5	112.57	84.76	121.34	125.8	129.9	138.52	130.66	ATP synthase peripheral stalk-membrane subunit b
23471	TRAM1	NM_001317804,NM_001317805,NM_014294	146.12	106.19	119.33	121.51	118.23	115.69	117.11	132.06	135.23	136.49	translocation associated membrane protein 1
64129	TINAGL1	NM_001204414,NM_001204415,NM_022164	116.88	106.18	81.23	108.41	80.82	98.06	99.32	100.64	92.89	109.28	tubulointerstitial nephritis antigen like 1
6307	MSMO1	NM_001017369,NM_006745	71.19	106.14	72.12	127.85	54.31	43.38	48.3	51.94	53.65	48.58	methylsterol monooxygenase 1
11130	ZWINT	NM_001005413,NM_007057,NM_032997	91.82	106.13	81.98	120.19	58.73	109.67	118.23	132.7	137.55	140.11	ZW10 interacting kinetochore protein
10952	SEC61B	NM_006808	99.83	106.08	102.92	104.46	87.84	150.38	139.14	145.54	165.57	137.02	Sec61 translocon beta subunit
8666	EIF3G	NM_003755	95.05	105.84	86.12	95.44	82.39	108.11	108.49	95.38	98.02	102.6	eukaryotic translation initiation factor 3 subunit G
4201	MEA1	NM_001318942,NM_001318943,NM_014623	84.99	105.74	95.28	107.8	88.43	81.22	78.62	93.94	94.76	93.79	male-enhanced antigen 1
10921	RNPS1	NM_001286625,NM_001286626,NM_001286627,NM_006711,NM_080594	112.72	105.61	96.39	105.78	100.37	114.58	124.2	108.88	103.33	108.64	RNA binding protein with serine rich domain 1
51109	RDH11	NM_001252650,NM_016026	98.68	105.51	105.94	117.14	93.49	56.67	50.25	64.99	64.09	63.65	retinol dehydrogenase 11 (all-trans/9-cis/11-cis)
8079	MLF2	NM_005439	105.18	105.46	97.78	112.48	108	285.51	276.45	293.04	261.82	298.39	myeloid leukemia factor 2
1642	DDB1	NM_001923	105.75	105.43	94.26	111.32	82.54	91.92	101.05	95.09	102.46	98.8	damage specific DNA binding protein 1
388962	BOLA3	NM_001035505,NM_212552	104.45	105.42	85.66	121.62	73.91	64.08	63.41	81.97	95.69	77.79	bolA family member 3
4072	EPCAM	NM_002354	147.81	105.29	86.51	113.6	75.39	72.09	100.01	75.85	99.36	64.47	epithelial cell adhesion molecule
4729	NDUFV2	NM_021074	110.88	105.29	100.99	99.83	93.92	73.31	63.97	73.38	67.73	75.11	NADH:ubiquinone oxidoreductase core subunit V2
51506	UFC1	NM_016406	82.57	105.14	108.36	121.19	113.21	91.34	97.15	108.95	110.73	106.52	ubiquitin-fold modifier conjugating enzyme 1
928	CD9	NM_001330312,NM_001769	104.3	105.07	87.09	115.05	94.87	229.94	276.65	230.88	305.38	220.25	CD9 molecule
11014	KDELR2	NM_001100603,NM_006854	115.59	104.93	97.94	113.68	91.55	117.38	126.5	122.52	146.96	122.1	KDEL endoplasmic reticulum protein retention receptor 2
6897	TARS	NM_001258437,NM_001258438,NM_152295	123.24	104.81	117.84	99.13	114.35	87.15	91.58	86.12	88.96	86.12	threonyl-tRNA synthetase
6611	SMS	NM_001258423,NM_004595	124.31	104.75	93.76	116.53	75.3	124.15	145.1	118.71	147.28	116.18	spermine synthase
192286	HIGD2A	NM_138820	71.14	104.63	115.39	107.97	108	89.04	72.6	90.67	75.78	94.59	HIG1 hypoxia inducible domain family member 2A
1207	CLNS1A	NM_001293,NM_001311199,NM_001311200,NM_001311201,NM_001311202	109.78	104.6	88.22	115.81	77.46	113.4	138.08	112.76	144.41	110.85	chloride nucleotide-sensitive channel 1A
706	TSPO	NM_000714,NM_001256530,NM_001256531	80.13	104.54	88.4	91.33	87.58	118.6	125.82	108.03	125.48	110.45	translocator protein
55052	MRPL20	NM_001318485,NM_017971	130.41	104.22	94.81	105.05	80.32	175.34	154.72	162.42	155.49	163.14	mitochondrial ribosomal protein L20
7296	TXNRD1	NM_001093771,NM_001261445,NM_001261446,NM_003330,NM_182729,NM_182742,NM_182743	109.77	104.17	77.39	119.16	97.43	209.9	214.62	188.97	215.24	184.51	thioredoxin reductase 1
204	AK2	NM_001199199,NM_001319139,NM_001319140,NM_001319141,NM_001319142,NM_001319143,NM_001625,NM_013411	108.81	104.06	96.93	99.78	87.01	162.26	149.85	152.66	156.31	159.63	adenylate kinase 2
1431	CS	NM_004077	102.53	103.97	90.1	100.04	76.67	235.29	247.3	242.92	250.02	250.25	citrate synthase
2745	GLRX	NM_001118890,NM_001243658,NM_001243659,NM_002064	77.61	103.88	128.32	111.93	133.75	24.84	20.99	33.46	28.07	35.44	glutaredoxin
1312	COMT	NM_000754,NM_001135161,NM_001135162,NM_007310	91.27	103.77	77.61	100.19	68.33	74.65	90.28	80.39	90.96	72.58	catechol-O-methyltransferase
56851	EMC7	NM_020154	102.07	103.71	127.06	122.26	149.79	97.39	80.11	101.28	101.64	99.52	ER membrane protein complex subunit 7
3489	IGFBP6	NM_002178	61.07	103.71	99.74	100.09	137.55	55.02	47.27	71.82	56.6	75.73	insulin like growth factor binding protein 6
1033	CDKN3	NM_001130851,NM_001330173,NM_005192	118.69	103.69	88.16	106.21	60.53	87.98	86.62	99	82.66	97.77	cyclin dependent kinase inhibitor 3
5515	PPP2CA	NM_001355019,NM_002715	139.57	103.68	112.53	111.47	106.8	89.28	79.4	78.93	78.07	77.27	protein phosphatase 2 catalytic subunit alpha
51616	TAF9B	NM_015975	84.95	103.62	133.42	115.14	119.06	23.57	25.11	30.26	31.85	31.03	TATA-box binding protein associated factor 9b
4720	NDUFS2	NM_001166159,NM_004550	69.32	103.54	88.75	105.76	86.83	60.47	63.03	70.05	65.61	73.14	NADH:ubiquinone oxidoreductase core subunit S2
10280	SIGMAR1	NM_001282205,NM_001282206,NM_001282207,NM_001282208,NM_001282209,NM_005866,NM_147157	91.6	103.22	86.67	116.79	69.43	179.34	192.01	199.05	203.78	204.24	sigma non-opioid intracellular receptor 1
10942	PRSS21	NM_001270452,NM_006799,NM_144956,NM_144957	70.33	103.18	98.26	109.81	105.3	17.34	16.97	21.84	19.74	23.92	protease, serine 21
124801	LSM12	NM_152344	102.67	103.14	90.45	108.7	86.62	60.85	56.24	55.35	45.96	53.53	LSM12 homolog
11338	U2AF2	NM_001012478,NM_007279	103.25	103.05	78.8	93.96	79.5	106.9	101.42	97.5	91.54	93.78	U2 small nuclear RNA auxiliary factor 2
1499	CTNNB1	NM_001098209,NM_001098210,NM_001330729,NM_001904	106.36	103.05	126.72	104.67	133.62	83.37	83.16	86.48	88.17	81.43	catenin beta 1
51155	JPT1	NM_001002032,NM_001002033,NM_001288609,NM_001288610,NM_001288611,NM_016185	117.5	102.8	115.17	116.31	89.48	93.14	96.8	112.82	116.13	114.48	Jupiter microtubule associated homolog 1
5476	CTSA	NM_000308,NM_001127695,NM_001167594	76.51	102.52	116.17	106.51	159.14	86.01	73.96	87.24	83.61	92.03	cathepsin A
65005	MRPL9	NM_001300733,NM_031420	98.72	102.28	83.25	108.76	69.94	59.31	65.85	62.65	73.07	62.12	mitochondrial ribosomal protein L9
6625	SNRNP70	NM_001301069,NM_003089	90.88	102.11	79.15	102.91	74.2	102.83	105.01	104.65	109.1	106.48	small nuclear ribonucleoprotein U1 subunit 70
25937	WWTR1	NM_001168278,NM_001168280,NM_001348362,NM_015472	94.85	101.91	107.94	105.11	96.14	59.33	41.46	46.29	32.46	45.19	WW domain containing transcription regulator 1
10914	PAPOLA	NM_001252006,NM_001252007,NM_001293627,NM_001293628,NM_001293632,NM_032632	113.13	101.85	96.27	101.92	90.78	65.86	74.6	71.02	74.67	70.07	poly(A) polymerase alpha
550	AUP1	NM_181575	102.21	101.58	98	108.25	106.02	101.06	100.71	100.58	101.08	94.33	AUP1, lipid droplet regulating VLDL assembly factor
7265	TTC1	NM_001282500,NM_003314	118.63	101.58	108.02	114.83	110.87	64.56	67.63	70.6	69.19	66.5	tetratricopeptide repeat domain 1
7112	TMPO	NM_001032283,NM_001032284,NM_001307975,NM_003276	111.84	101.48	97.95	108.52	65.1	112.19	117.37	122.65	111.59	120.26	thymopoietin
2810	SFN	NM_006142	74.31	101.45	72.91	109.59	61.97	46.06	48.54	74.34	70.38	73.96	stratifin
28972	SPCS1	NM_014041	102.81	101.44	94.71	108.67	82.99	100.61	92.82	105.79	108.46	102.64	signal peptidase complex subunit 1
6428	SRSF3	NM_003017	122.4	101.39	95.61	104.36	73.05	121.59	99.89	78.91	51.45	70.33	serine and arginine rich splicing factor 3
51371	POMP	NM_015932	97.13	100.98	87.62	110.04	80.71	117.6	120.1	122.82	158.53	116.9	proteasome maturation protein
653784	MZT2A	NM_001085365	83.39	100.78	79.39	110.82	58.19	78.7	78.73	84.06	100.45	85.99	mitotic spindle organizing protein 2A
4191	MDH2	NM_001282403,NM_001282404,NM_005918	94.65	100.51	82.12	103.6	72.16	134.18	129.38	141.77	144.07	140.16	malate dehydrogenase 2
7384	UQCRC1	NM_003365	82.95	100.5	90.96	100.38	78.3	123.56	128.23	141.91	140.97	148.55	ubiquinol-cytochrome c reductase core protein 1
29927	SEC61A1	NM_013336	114.1	100.47	121.06	98.12	125.87	149.97	143.33	141.5	136.4	140.78	Sec61 translocon alpha 1 subunit
3074	HEXB	NM_000521,NM_001292004	93.49	100.46	108.22	114.12	148.57	80.12	85.82	89.11	97.71	87.66	hexosaminidase subunit beta
10552	ARPC1A	NM_001190996,NM_006409	93.23	100.27	92.26	101.82	87.04	151.26	151.79	168.46	167.79	171.68	actin related protein 2/3 complex subunit 1A
10657	KHDRBS1	NM_001271878,NM_006559	128.01	99.66	102.78	90.19	80.26	92.54	97.46	92.35	92.06	88.47	KH RNA binding domain containing, signal transduction associated 1
983	CDK1	NM_001170406,NM_001170407,NM_001320918,NM_001786,NM_033379	84.72	99.64	97.28	115.75	69.81	101.11	103.62	127.79	120.47	129.91	cyclin dependent kinase 1
9296	ATP6V1F	NM_001198909,NM_004231	81.82	99.59	96.83	114.99	100.49	120.08	104.68	135.23	121.7	131.7	ATPase H+ transporting V1 subunit F
64979	MRPL36	NM_032479	96.49	99.5	96.1	105.82	77.58	62.2	53.27	59.95	59.13	53.55	mitochondrial ribosomal protein L36
677	ZFP36L1	NM_001244698,NM_001244701,NM_004926	80.64	99.32	130.06	88.76	165.13	111.17	116.9	91.15	78.45	85.94	ZFP36 ring finger protein like 1
1019	CDK4	NM_000075	95.51	99.29	97.09	111.02	96.67	327.63	368.87	302.47	368.15	300.11	cyclin dependent kinase 4
6391	SDHC	NM_001035511,NM_001035512,NM_001035513,NM_001278172,NM_003001	92.09	99.15	91.11	106.33	88.78	39.46	41.99	44.76	46.49	44.8	succinate dehydrogenase complex subunit C
377	ARF3	NM_001659	93.96	99.09	109.97	107.34	108.16	153.66	150.36	165.38	161.55	168.29	ADP ribosylation factor 3
10490	VTI1B	NM_006370	93.91	98.93	84.51	104.51	73.32	59.48	56.49	61.64	64.78	61.41	vesicle transport through interaction with t-SNAREs 1B
214	ALCAM	NM_001243280,NM_001243281,NM_001243283,NM_001627	121.5	98.92	104.51	95.66	89.73	55.99	48.03	60.08	45.07	60.11	activated leukocyte cell adhesion molecule
27069	GHITM	NM_014394	100.91	98.89	95.24	113.24	98.29	118.62	115.51	125.64	132.67	128.16	growth hormone inducible transmembrane protein
4627	MYH9	NM_002473	122.54	98.71	110.22	82.38	104.94	50.92	52.92	48.08	46.19	49.88	myosin heavy chain 9
1462	VCAN	NM_001126336,NM_001164097,NM_001164098,NM_004385	68.39	98.59	112.3	90.09	104.35	167.03	119.65	134.9	110.11	144.15	versican
5763	PTMS	NM_001330333,NM_002824	67.85	98.59	108.9	97.54	95.18	455.98	513.59	485.99	557.1	524.19	parathymosin
2108	ETFA	NM_000126,NM_001127716	108.46	98.22	102.04	111.54	88.13	124.35	125.43	134.83	148.03	131.29	electron transfer flavoprotein alpha subunit
7533	YWHAH	NM_003405	98.93	98.04	90.09	112.27	76.83	67.36	72.89	70.91	75.4	72.46	tyrosine 3-monooxygenase/tryptophan 5-monooxygenase activation protein eta
81037	CLPTM1L	NM_030782	101.16	97.98	91.25	84.5	87.01	75.75	72.54	74.14	78.13	73.48	CLPTM1 like
7873	MANF	NM_006010	101.42	97.88	111.83	86.07	99.58	93.35	110.83	112.22	111.94	105.3	mesencephalic astrocyte derived neurotrophic factor
51264	MRPL27	NM_016504	77.31	97.88	74.83	102.89	71.56	65	62.36	68.02	64.14	64.02	mitochondrial ribosomal protein L27
51747	LUC7L3	NM_001330330,NM_006107,NM_016424	98.88	97.84	86.31	107.77	78.03	85.72	87.76	82.39	87.09	85.24	LUC7 like 3 pre-mRNA splicing factor
5705	PSMC5	NM_001199163,NM_002805	82.04	97.79	93.31	98.03	69.9	174.1	174.11	190.96	201.73	192.53	proteasome 26S subunit, ATPase 5
90411	MCFD2	NM_001171506,NM_001171507,NM_001171508,NM_001171509,NM_001171510,NM_001171511,NM_139279	101.65	97.56	128.11	106.44	137.82	110.13	85.18	102.95	87.47	100.8	multiple coagulation factor deficiency 2
8682	PEA15	NM_001297576,NM_001297577,NM_001297578,NM_003768	110.83	97.55	114.19	108.7	144.1	87.92	88.34	87	97.99	92.19	proliferation and apoptosis adaptor protein 15
3189	HNRNPH3	NM_001322434,NM_001322436,NM_001322437,NM_001322438,NM_001322439,NM_001322440,NM_001322441,NM_001322442,NM_001322443,NM_001322444,NM_001322445,NM_001322446,NM_001322447,NM_001322448,NM_001322449,NM_001322450,NM_001322451,NM_001322452,NM_001322453,NM_012207,NM_021644	127.88	97.54	96.37	97.91	77.05	82.91	83.39	91.92	79.86	88.64	heterogeneous nuclear ribonucleoprotein H3
51205	ACP6	NM_001323625,NM_016361	48.7	97.48	88.75	97.37	63.17	10.56	10.21	10.77	10.88	11.75	acid phosphatase 6, lysophosphatidic
5707	PSMD1	NM_001191037,NM_002807	103.67	97.42	84.8	105.15	71.29	74.7	72.67	75.16	76.23	73.88	proteasome 26S subunit, non-ATPase 1
10016	PDCD6	NM_001267556,NM_001267557,NM_001267558,NM_001267559,NM_013232	88.12	97.41	95.48	93.06	104.13	118.84	121.64	108.29	115.09	103.34	programmed cell death 6
9446	GSTO1	NM_001191002,NM_001191003,NM_004832	79.1	97.4	105.54	108.72	102.79	114.53	119.66	129.46	139.7	132.33	glutathione S-transferase omega 1
4706	NDUFAB1	NM_005003	92.65	97.38	94.52	104.4	83.42	91.17	89.03	90.66	77.67	83.3	NADH:ubiquinone oxidoreductase subunit AB1
51150	SDF4	NM_016176,NM_016547	83.28	97.21	103.03	87.26	109.6	117.03	109.68	119.46	110.35	118.15	stromal cell derived factor 4
5683	PSMA2	NM_002787	99.41	97.13	92.24	107.43	80.44	116.76	121.81	123.54	150.73	122.19	proteasome subunit alpha 2
3216	HOXB6	NM_018952	104.2	97.12	130	83.48	121.4	20.08	24.36	21.06	34	25.09	homeobox B6
79053	ALG8	NM_001007027,NM_024079	89.59	96.87	86.47	101.55	77.23	108.21	120.58	123.78	130.93	124.15	ALG8, alpha-1,3-glucosyltransferase
1347	COX7A2	NM_001865	91.29	96.75	91.49	102.55	84.24	120.19	120.49	133.09	149.61	134.66	cytochrome c oxidase subunit 7A2
6748	SSR4	NM_001204526,NM_001204527,NM_006280	89.79	96.67	111.68	101.76	116.04	176.88	152.87	170.68	182.29	166.49	signal sequence receptor subunit 4
4722	NDUFS3	NM_004551	91.49	96.36	85.62	108.16	88.52	68.76	66.98	73.47	71.09	72.25	NADH:ubiquinone oxidoreductase core subunit S3
23787	MTCH1	NM_001271641,NM_014341	87.21	96.2	89.88	101.58	103.07	109.44	114.93	122.67	126.83	122.98	mitochondrial carrier 1
990	CDC6	NM_001254	104.17	96.12	74.01	112.59	53.85	43.24	47.91	46.22	52.22	45.42	cell division cycle 6
5917	RARS	NM_002887	109.13	96.07	86.15	90.54	66.59	92.35	87.75	84.93	81.97	81.47	arginyl-tRNA synthetase
4709	NDUFB3	NM_001257102,NM_002491	89.81	95.87	88.84	111.2	76.25	60.05	62.95	69.66	79.1	76.97	NADH:ubiquinone oxidoreductase subunit B3
7385	UQCRC2	NM_003366	93.7	95.78	96.9	106.33	84.75	98.19	107.03	115.43	120.22	113.87	ubiquinol-cytochrome c reductase core protein 2
55004	LAMTOR1	NM_017907	82.91	95.71	92.04	87.43	103.37	117.23	108.22	114.66	118.37	108.43	late endosomal/lysosomal adaptor, MAPK and MTOR activator 1
372	ARCN1	NM_001142281,NM_001655	98.94	95.7	93.46	101.58	103.36	115.79	107.13	121.43	104.23	122.45	archain 1
7127	TNFAIP2	NM_006291	61.25	95.7	82.63	105.36	101.5	28.12	27.68	26.35	28.57	29.34	TNF alpha induced protein 2
1652	DDT	NM_001084392,NM_001355	69.78	95.6	90.41	104.93	72.8	133.1	129.73	157.32	147.48	154.92	D-dopachrome tautomerase
7818	DAP3	NM_001199849,NM_001199850,NM_001199851,NM_004632,NM_033657	112.5	95.58	96.34	99.72	93.56	79.13	79.22	80.88	85.21	83.21	death associated protein 3
11007	CCDC85B	NM_006848	50.32	95.57	87.81	92.86	89.1	82.91	74.37	89.08	79.74	87.97	coiled-coil domain containing 85B
28969	BZW2	NM_001159767,NM_014038	106.05	95.53	82.35	97.04	63.03	65.79	70.78	63.13	83.73	65.15	basic leucine zipper and W2 domains 2
5201	PFDN1	NM_002622	104.42	95.47	95.04	99.46	105.54	97.36	93.15	83.86	81.55	84.39	prefoldin subunit 1
25804	LSM4	NM_001252129,NM_012321	86.23	95.28	76.02	93.05	63.53	91.45	106.33	99.61	120.5	102.29	LSM4 homolog, U6 small nuclear RNA and mRNA degradation associated
51107	APH1A	NM_001077628,NM_001243771,NM_001243772,NM_016022	108.39	95.13	105.18	88	113.49	75.58	80.61	67.29	75.73	68.34	aph-1 homolog A, gamma-secretase subunit
55256	ADI1	NM_001306077,NM_018269	82.17	95.08	84.9	117.14	80.43	132.03	141.26	138.02	163.53	139.03	acireductone dioxygenase 1
10573	MRPL28	NM_006428	76.07	95.07	71.68	87.16	65.7	75.06	78.99	85.66	84.37	82.13	mitochondrial ribosomal protein L28
3030	HADHA	NM_000182	85.8	95.06	91.76	102.96	79.59	91.11	84.73	96.82	94.38	99.96	hydroxyacyl-CoA dehydrogenase trifunctional multienzyme complex subunit alpha
1974	EIF4A2	NM_001967	124.56	95.01	155.14	82.36	179.76	112.94	86.29	84.83	67.77	80.38	eukaryotic translation initiation factor 4A2
51699	VPS29	NM_001282150,NM_001282151,NM_016226,NM_057180	86.28	94.87	97.49	111.08	86.96	60.2	63.69	66.72	73.24	68.23	VPS29, retromer complex component
10131	TRAP1	NM_001272049,NM_016292	99.95	94.81	64.09	87.56	45.9	96.35	97.71	92.22	97.09	91.89	TNF receptor associated protein 1
362	AQP5	NM_001651	78.23	94.52	90.5	97.44	88.82	0.64	1.56	0.42	0.93	0.27	aquaporin 5
56951	C5orf15	NM_020199	94.23	94.07	113.37	110.26	124.17	52.21	49.21	54.59	55.74	56.99	chromosome 5 open reading frame 15
6342	SCP2	NM_001007098,NM_001007099,NM_001007100,NM_001007250,NM_001193599,NM_001193600,NM_001193617,NM_001330587,NM_002979	73.48	93.93	99.61	103.11	93.33	47.66	51.41	55.67	55.66	54.4	sterol carrier protein 2
6472	SHMT2	NM_001166356,NM_001166357,NM_001166358,NM_001166359,NM_005412	74.23	93.86	82.22	99.91	81.98	217.01	278.04	258.69	304.46	267.62	serine hydroxymethyltransferase 2
51703	ACSL5	NM_016234,NM_203379,NM_203380	55.08	93.69	130.36	103.35	139.1	240.1	238.21	230.32	266.74	246.7	acyl-CoA synthetase long chain family member 5
8751	ADAM15	NM_001261464,NM_001261465,NM_001261466,NM_003815,NM_207191,NM_207194,NM_207195,NM_207196,NM_207197	82.6	93.68	101.51	90.58	109.74	37.13	40.53	40.3	44.15	41.63	ADAM metallopeptidase domain 15
4723	NDUFV1	NM_001166102,NM_007103	79.93	93.62	90.57	88.42	81.11	129.69	141.05	141.62	144.93	144.12	NADH:ubiquinone oxidoreductase core subunit V1
84661	DPY30	NM_001321209,NM_001321210,NM_032574	92.01	93.56	94.4	102.36	91.8	77.5	67.76	79.42	66.11	73.46	dpy-30, histone methyltransferase complex regulatory subunit
22974	TPX2	NM_012112	129.47	93.5	107.95	88.87	67.44	176.47	174.37	178.96	138.29	166.09	TPX2, microtubule nucleation factor
6881	TAF10	NM_006284	70.31	92.96	85.4	90.44	84.59	116.61	121.79	127.93	124.82	126.86	TATA-box binding protein associated factor 10
84326	METTL26	NM_001040160,NM_001040161,NM_001040162,NM_001040165,NM_001288710,NM_032366	87.68	92.95	75.37	74.26	60.21	68.36	75.83	69.03	86.5	73.62	methyltransferase like 26
1889	ECE1	NM_001113347,NM_001113348,NM_001113349,NM_001397	78.89	92.74	113.55	87.95	134.11	25.32	24.6	25.83	22	27.4	endothelin converting enzyme 1
10237	SLC35B1	NM_001278784,NM_005827	95.83	92.56	91.45	93.97	92.21	49.86	48.92	53.09	53.84	53.44	solute carrier family 35 member B1
10263	CDK2AP2	NM_001271849,NM_005851	82.8	92.28	94.7	98.25	92.9	83.71	111	102.49	105.6	99.42	cyclin dependent kinase 2 associated protein 2
28231	SLCO4A1	NM_016354	42.28	92.15	98.57	50.12	131.63	241.09	235.53	272.93	258.39	292.12	solute carrier organic anion transporter family member 4A1
8763	CD164	NM_001142401,NM_001142402,NM_001142403,NM_001142404,NM_001346500,NM_006016	90.24	92.09	119.85	104.65	147.51	106.05	94.13	112.96	112.72	117.41	CD164 molecule
5936	RBM4	NM_001198843,NM_001198844,NM_002896	89.78	92.01	91.78	93.1	94.95	84.39	80.8	83.34	92.89	81.48	RNA binding motif protein 4
8664	EIF3D	NM_003753	92.9	91.87	85.09	89.09	73.67	90.56	91.27	90.06	103.36	99.36	eukaryotic translation initiation factor 3 subunit D
3337	DNAJB1	NM_001300914,NM_001313964,NM_006145	82.18	91.77	100.96	97.68	97.62	80.08	87.96	88.51	75.44	80.62	DnaJ heat shock protein family (Hsp40) member B1
3417	IDH1	NM_001282386,NM_001282387,NM_005896	67.3	91.7	74.16	101.39	68.28	49.18	52.68	63.44	64.84	63.41	isocitrate dehydrogenase (NADP(+)) 1, cytosolic
219927	MRPL21	NM_181514,NM_181515	104.78	91.67	90.76	99.32	81.27	87.02	91.53	95.41	102.03	102.72	mitochondrial ribosomal protein L21
5819	NECTIN2	NM_001042724,NM_002856	93.12	91.53	89.87	82.22	92.66	35.8	37.01	33.7	34.01	30.14	nectin cell adhesion molecule 2
5931	RBBP7	NM_001198719,NM_002893	85.5	91.47	79.14	93.86	66.66	128.13	140.16	145.63	153.83	145.66	RB binding protein 7, chromatin remodeling factor
891	CCNB1	NM_001354844,NM_001354845,NM_031966	166.59	91.47	120.34	77.73	67.14	157.44	145.65	136.29	109.95	117.05	cyclin B1
56647	BCCIP	NM_016567,NM_078468,NM_078469	96.99	91.38	71.23	97.03	55.91	96.38	96.32	96.38	107.83	94.84	BRCA2 and CDKN1A interacting protein
29086	BABAM1	NM_001033549,NM_001288756,NM_001288757,NM_014173	75.44	91.36	81.18	94.95	75.81	53.45	54.37	54.1	59.98	56.68	BRISC and BRCA1 A complex member 1
100287932	TIMM23	NM_006327	107.85	91.31	92.81	94.93	82.1	131.78	117.94	123.11	116.32	121.48	translocase of inner mitochondrial membrane 23
306	ANXA3	NM_005139	133.14	91.24	62.23	105.2	48.79	7.17	13.03	7.56	14.02	9.1	annexin A3
79888	LPCAT1	NM_024830	126.98	90.89	95.72	63.1	64.9	41.46	36.27	47.16	32.95	44.03	lysophosphatidylcholine acyltransferase 1
382	ARF6	NM_001663	83.74	90.81	78.9	79.82	70.4	65.31	55.11	50.14	39.05	47.62	ADP ribosylation factor 6
7756	ZNF207	NM_001032293,NM_001098507,NM_003457	114.76	90.75	85.84	89.92	83.13	152.01	130.2	126.09	124.51	125.12	zinc finger protein 207
54732	TMED9	NM_017510	87.08	90.58	86.98	91.1	97.43	65.7	70.66	69.71	78.3	72.53	transmembrane p24 trafficking protein 9
5501	PPP1CC	NM_001244974,NM_002710	120.78	90.58	86.85	89.06	72.33	100.54	94.4	90.88	81.66	88.91	protein phosphatase 1 catalytic subunit gamma
216	ALDH1A1	NM_000689	78.88	90.55	51.38	93.15	29.62	0.05	0.09	0.05	0.09	0.16	aldehyde dehydrogenase 1 family member A1
10204	NUTF2	NM_001322038,NM_001322039,NM_001322040,NM_001322041,NM_005796	85.32	90.54	83.37	97.06	72.21	87.09	103.79	96.45	123.27	98.43	nuclear transport factor 2
3295	HSD17B4	NM_000414,NM_001199291,NM_001199292,NM_001292027,NM_001292028	75.8	90.51	84.13	95.51	77.91	75.12	77.08	86.05	85.28	82.22	hydroxysteroid 17-beta dehydrogenase 4
26135	SERBP1	NM_001018067,NM_001018068,NM_001018069,NM_015640	110.52	90.49	81.75	88.8	65.95	116.44	112.87	108.25	109.94	102.79	SERPINE1 mRNA binding protein 1
1655	DDX5	NM_001320595,NM_001320596,NM_001320597,NM_004396	123.11	90.39	100.39	92.38	98.81	166.8	124.69	131.34	111.19	121.36	DEAD-box helicase 5
3550	IK	NM_006083	93.96	90.37	95.13	91.89	89.41	77.03	78.22	79.41	77.33	81.25	IK cytokine
51126	NAA20	NM_016100,NM_181527,NM_181528	107.34	90.32	87.39	86.57	83.71	38.86	37.03	38.4	36.32	36.81	N(alpha)-acetyltransferase 20, NatB catalytic subunit
6627	SNRPA1	NM_003090	83.83	90.23	56.16	112.9	42.81	79.6	87.6	84.69	104.46	77.88	small nuclear ribonucleoprotein polypeptide A'
9768	PCLAF	NM_001029989,NM_014736	101.67	90.23	83.91	107.28	64.55	102.63	115.12	123.57	120.47	119.88	PCNA clamp associated factor
29924	EPN1	NM_001130071,NM_001130072,NM_001321263,NM_013333	79.16	90.18	81.46	84.89	91.34	71.21	77.73	74.94	72.09	76.22	epsin 1
1345	COX6C	NM_004374	80.62	90.18	98.72	106.17	82.15	97.39	98.41	98.85	111.97	105.54	cytochrome c oxidase subunit 6C
4176	MCM7	NM_001278595,NM_005916,NM_182776	87.38	90.08	73.97	87.01	54.21	135.7	148.61	134.85	148.1	137.48	minichromosome maintenance complex component 7
8880	FUBP1	NM_001303433,NM_003902	124.26	89.99	91.57	72.08	76.89	84.26	82.23	78.64	66.83	72.87	far upstream element binding protein 1
51246	SHISA5	NM_001272065,NM_001272066,NM_001272067,NM_001272068,NM_001272082,NM_001272083,NM_016479	65.86	89.93	111.99	90.81	156.78	91.21	87.31	92.18	96.92	99.07	shisa family member 5
10726	NUDC	NM_006600	97.06	89.92	76.37	87.45	65.9	80.52	79.87	80.5	81.79	77.31	nuclear distribution C, dynein complex regulator
27089	UQCRQ	NM_014402	70.75	89.91	74.98	101.95	67.09	53.69	61.33	60.71	79.22	63.69	ubiquinol-cytochrome c reductase complex III subunit VII
2971	GTF3A	NM_002097	73.19	89.89	82.76	93.49	66.65	47.91	48.93	54.28	55.78	58.85	general transcription factor IIIA
64834	ELOVL1	NM_001256399,NM_001256401,NM_001256402,NM_022821	105.51	89.76	86.97	86.71	96.24	130.89	126.02	121.53	127.99	122.71	ELOVL fatty acid elongase 1
11316	COPE	NM_001330469,NM_007263,NM_199442,NM_199444	70.97	89.18	87.42	89.22	103.5	79.66	80.78	86.29	85.1	85.52	coatomer protein complex subunit epsilon
10616	RBCK1	NM_001323956,NM_001323958,NM_001323960,NM_006462,NM_031229	74.28	89.12	81.87	93.57	137.99	43.63	41.6	45.12	47.58	47.01	RANBP2-type and C3HC4-type zinc finger containing 1
6880	TAF9	NM_001015892,NM_003187	100.28	89.06	82.12	118.08	83.27	83.2	81.78	81.96	104.57	84.28	TATA-box binding protein associated factor 9
581	BAX	NM_001291428,NM_001291429,NM_001291430,NM_001291431,NM_004324,NM_138761,NM_138763,NM_138764	76.7	88.72	67.75	82.74	71.77	81.79	86.87	84.25	91.33	78.19	BCL2 associated X, apoptosis regulator
2783	GNB2	NM_005273	73.19	88.55	76.69	85.54	74.18	158.57	166.78	163.51	166.62	162.98	G protein subunit beta 2
10857	PGRMC1	NM_001282621,NM_006667	88.6	88.51	86.32	98.89	73.36	115.27	118.24	120.18	151.64	125.11	progesterone receptor membrane component 1
1452	CSNK1A1	NM_001025105,NM_001271741,NM_001271742,NM_001892	107.84	88.34	105.53	88.8	127.4	63.71	55.63	58.96	46.49	54.32	casein kinase 1 alpha 1
1627	DBN1	NM_004395,NM_080881	79.83	88.25	84.43	71.31	94.57	33.14	31.18	23.18	24.13	22.72	drebrin 1
80777	CYB5B	NM_030579	69.44	87.94	87.66	91.23	93.88	86.49	71.79	81.57	67.26	72.98	cytochrome b5 type B
27339	PRPF19	NM_014502	99.86	87.86	92.88	82.49	75.92	73.19	82.79	70.29	81.74	73.32	pre-mRNA processing factor 19
27101	CACYBP	NM_001007214,NM_014412	105.72	87.85	77.3	95.53	59.62	67.71	76.73	69.67	79.14	70.87	calcyclin binding protein
4907	NT5E	NM_001204813,NM_002526	91.59	87.75	140.46	78.55	130.45	136.41	113.5	95.82	101.5	94.78	5'-nucleotidase ecto
10067	SCAMP3	NM_005698,NM_052837	80.05	87.73	86.4	88.94	96.28	69.38	67.35	78.13	76.48	78.02	secretory carrier membrane protein 3
10342	TFG	NM_001007565,NM_001195478,NM_001195479,NM_006070	95.31	87.69	94.86	84.27	99.33	75.39	72.14	76.28	70.35	72.65	TRK-fused gene
27338	UBE2S	NM_014501	130.12	87.65	84.83	73.83	81.66	234.66	203.27	222.01	177.24	222.91	ubiquitin conjugating enzyme E2 S
11243	PMF1	NM_001199653,NM_001199654,NM_007221	62.29	87.59	74.54	95.87	65.74	61.51	68.54	68.91	71.26	76.73	polyamine modulated factor 1
1059	CENPB	NM_001810	93.22	87.48	80.7	82.69	85.57	34.35	30.75	28.16	25.92	28.28	centromere protein B
10535	RNASEH2A	NM_006397	68.25	87.47	73.91	92.95	52.03	72.15	76.87	78.6	80.79	77.73	ribonuclease H2 subunit A
55974	SLC50A1	NM_001122837,NM_001122839,NM_001287586,NM_001287587,NM_001287588,NM_001287589,NM_001287590,NM_001287591,NM_001287592,NM_018845	51.42	87.44	66.37	104.37	71.07	45.94	43.03	53.4	47.8	55.92	solute carrier family 50 member 1
6520	SLC3A2	NM_001012662,NM_001012664,NM_001013251,NM_002394	89.26	87.31	87.11	82.85	185.28	83.46	85.22	80.19	94.46	86.97	solute carrier family 3 member 2
7323	UBE2D3	NM_001300795,NM_003340,NM_181886,NM_181887,NM_181888,NM_181889,NM_181890,NM_181891,NM_181892,NM_181893	99.52	87.22	87.57	88.33	99.1	101.35	94.49	95.09	82.95	91.61	ubiquitin conjugating enzyme E2 D3
57222	ERGIC1	NM_001031711	91.23	87.09	99.75	80	99.23	64.09	67.56	70.2	67.94	68.97	endoplasmic reticulum-golgi intermediate compartment 1
4724	NDUFS4	NM_001318051,NM_002495	85.47	86.99	85.23	86.13	88.01	86.39	80.44	87.43	86.38	92.45	NADH:ubiquinone oxidoreductase subunit S4
2629	GBA	NM_000157,NM_001005741,NM_001005742,NM_001171811,NM_001171812	78.21	86.94	99.06	91.57	132.51	54.41	49	59.36	48.14	59.09	glucosylceramidase beta
8904	CPNE1	NM_001198863,NM_003915,NM_152925,NM_152926,NM_152927,NM_152928	96.79	86.93	90.93	72.93	80.97	108.86	144.37	105.92	132.24	102.54	copine 1
7803	PTP4A1	NM_003463	108.11	86.82	85.28	93.63	110.89	20.92	18.23	23.2	19.17	24.17	protein tyrosine phosphatase type IVA, member 1
4708	NDUFB2	NM_004546	65.81	86.7	91.58	94.75	78.1	158.74	181.99	168.98	217.83	170.13	NADH:ubiquinone oxidoreductase subunit B2
26155	NOC2L	NM_015658	97.23	86.69	65.16	81.5	58.68	74.19	71.81	71.15	77.49	71.34	NOC2 like nucleolar associated transcriptional repressor
85359	DGCR6L	NM_033257	70.52	86.64	82.13	85.04	82.75	50.65	47.98	52.78	53.72	53.8	DiGeorge syndrome critical region gene 6 like
26499	PLEK2	NM_016445	87.9	86.61	90.49	87.75	104.73	73.38	66.15	76.15	65.85	76.5	pleckstrin 2
27243	CHMP2A	NM_014453,NM_198426	76.09	86.58	91.71	86.97	87.38	50.93	47.41	58.08	55.67	59.55	charged multivesicular body protein 2A
4792	NFKBIA	NM_020529	52.39	86.42	91.72	88.94	112.92	41.07	39.71	44.34	32.43	43.94	NFKB inhibitor alpha
10471	PFDN6	NM_001185181,NM_001265595,NM_001265596,NM_014260	78.97	86.39	81.9	90.51	72.07	76.3	76.06	88.94	87.6	84.56	prefoldin subunit 6
51406	NOL7	NM_001317724,NM_016167	101.13	86.39	73.05	80.62	61.34	44.64	44.71	45.06	44.75	47.68	nucleolar protein 7
4001	LMNB1	NM_001198557,NM_005573	106.29	86.14	80.34	81.64	46.04	78.14	79.82	66.34	56.68	58.46	lamin B1
9553	MRPL33	NM_004891,NM_145330	82.19	85.9	75.92	112.1	67.31	58.05	46.88	57.48	65.34	57.03	mitochondrial ribosomal protein L33
51247	PAIP2	NM_001033112,NM_016480	84.18	85.85	90.31	93.34	105.94	58.2	65.38	60.21	74.25	67.5	poly(A) binding protein interacting protein 2
115098	CCDC124	NM_001136203,NM_138442	76.64	85.81	70.79	83.88	59.02	74.26	79.49	78.81	80.25	75.65	coiled-coil domain containing 124
7905	REEP5	NM_005669	87.27	85.8	89.08	98.57	86.72	52.86	50.28	55.55	57.36	60.76	receptor accessory protein 5
4173	MCM4	NM_005914,NM_182746	80.42	85.67	65.72	88	50.9	72.01	96.82	83.74	101.03	87.98	minichromosome maintenance complex component 4
1660	DHX9	NM_001357	99.62	85.65	76.85	88.93	55.57	96.22	109.29	103.04	109.41	100.36	DExH-box helicase 9
27440	HDHD5	NM_017829,NM_033070	83.28	85.56	69.22	78.45	61.86	45.15	48.49	40.34	44.19	41.88	haloacid dehalogenase like hydrolase domain containing 5
201254	CENPX	NM_001271006,NM_001271007,NM_001330536,NM_144998	63.79	85.46	53.6	79.01	41.05	104.36	110.93	126.98	130.25	121.84	centromere protein X
9343	EFTUD2	NM_001142605,NM_001258353,NM_001258354,NM_004247	75.82	85.35	73.46	84.95	64.85	51.41	54.85	48.84	51.65	51.36	elongation factor Tu GTP binding domain containing 2
1284	COL4A2	NM_001846	73.87	85.35	108.95	75.88	103.35	0.07	0.08	0.04	0.07	0.11	collagen type IV alpha 2 chain
7555	CNBP	NM_001127192,NM_001127193,NM_001127194,NM_001127195,NM_001127196,NM_003418	116.74	85.31	92.06	87.09	96.18	87.75	78.89	74.3	74.11	74.26	CCHC-type zinc finger nucleic acid binding protein
54948	MRPL16	NM_017840	68.97	85.27	70.32	89.94	60.98	51.39	50.39	44.5	51.54	46.63	mitochondrial ribosomal protein L16
7536	SF1	NM_001178030,NM_001178031,NM_001346363,NM_001346364,NM_001346409,NM_001346410,NM_004630,NM_201995,NM_201997,NM_201998	97.68	85.24	86.08	76	85.47	99.61	98.41	86.81	74.98	79.92	splicing factor 1
2109	ETFB	NM_001014763,NM_001985	64.65	85.13	86.11	85.3	87.05	62.49	62.3	68.05	69.37	74.44	electron transfer flavoprotein beta subunit
79036	KXD1	NM_001171948,NM_001171949,NM_024069	80.53	85.12	75.22	80.73	72.54	79.37	79.98	79.51	80.3	76.33	KxDL motif containing 1
5134	PDCD2	NM_001199461,NM_001199462,NM_001199463,NM_001199464,NM_002598,NM_144781	74.93	85.09	68.71	89.71	59.73	47.44	46.96	51.04	56.56	52.47	programmed cell death 2
1500	CTNND1	NM_001085458,NM_001085459,NM_001085460,NM_001085461,NM_001085462,NM_001085463,NM_001085464,NM_001085465,NM_001085466,NM_001085467,NM_001085468,NM_001085469,NM_001206883,NM_001206884,NM_001206885,NM_001206886,NM_001206887,NM_001206888,NM_001206889,NM_001206890,NM_001206891,NM_001331	93.55	85.09	93.44	82.83	90.83	5.57	6.32	5.07	4.7	5.27	catenin delta 1
65264	UBE2Z	NM_023079	75.65	85.05	92.55	89.25	102.97	57.82	56.21	56.84	52.33	60.58	ubiquitin conjugating enzyme E2 Z
65992	DDRGK1	NM_023935	68.5	84.83	73.78	81.03	77.79	26.13	25.72	24.11	23.57	24.73	DDRGK domain containing 1
2537	IFI6	NM_002038,NM_022872,NM_022873	17.2	84.82	461.71	86.61	1072.8	12.44	7.8	18.46	9.94	30.01	interferon alpha inducible protein 6
54460	MRPS21	NM_018997,NM_031901	82.69	84.8	85.55	94.9	79.16	36.36	36.25	38.29	36.92	37.99	mitochondrial ribosomal protein S21
90843	TCEAL8	NM_001006684,NM_153333	65.35	84.76	88.36	91.76	78.71	80.9	86.59	89.16	83.95	86.01	transcription elongation factor A like 8
1983	EIF5	NM_001969,NM_183004	130.31	84.59	84.55	82.56	93.3	65.58	52.06	46.95	42.55	49.71	eukaryotic translation initiation factor 5
51035	UBXN1	NM_001286077,NM_001286078,NM_015853	71.78	84.54	74.65	84.74	79.3	57.19	61.37	57.87	54.56	60.93	UBX domain protein 1
23385	NCSTN	NM_001290184,NM_001290186,NM_001349729,NM_015331	82.28	84.51	111.18	92.84	132.11	34.79	31.8	33.07	35.16	33.98	nicastrin
5531	PPP4C	NM_001303503,NM_001303504,NM_001303506,NM_001303507,NM_002720	75.04	84.41	81.67	82.73	82.55	123.38	133.46	122.67	129.36	109.89	protein phosphatase 4 catalytic subunit
1829	DSG2	NM_001943	96.54	84.4	71.95	89.64	61.5	13.01	14.82	15.41	16.38	14.89	desmoglein 2
10480	EIF3M	NM_001307929,NM_006360	109.11	84.39	79.75	88.56	68.89	184.23	183.4	161.41	187.47	167.88	eukaryotic translation initiation factor 3 subunit M
94239	H2AFV	NM_012412,NM_138635,NM_201436,NM_201516,NM_201517	74.9	84.36	75.37	91.97	55.86	77.67	98.06	95.83	115.14	94.57	H2A histone family member V
7408	VASP	NM_003370	87.17	84.32	87	81.68	98.16	56.23	60.86	56.7	59.4	57.14	vasodilator stimulated phosphoprotein
5719	PSMD13	NM_002817,NM_175932	86.66	84.22	79.27	86.88	67.53	125.21	148.6	132.84	156.29	132.33	proteasome 26S subunit, non-ATPase 13
26071	RTL8A	NM_001078172,NM_001134321	62.47	84.18	87.32	90.95	92.94	60.88	52.3	64.18	56.36	68.38	retrotransposon Gag like 8A
9761	MLEC	NM_001303627,NM_001303628,NM_014730	77.95	84.08	103.86	86.83	84.79	44.13	48.28	53.26	54.43	51.77	malectin
10955	SERINC3	NM_006811,NM_198941	80.87	83.98	107.02	81.62	119.47	80.75	74.55	77.05	68.61	78.77	serine incorporator 3
3281	HSBP1	NM_001537	68.78	83.86	92.57	92.07	90.57	70.66	75.51	79.7	98.24	76.13	heat shock factor binding protein 1
10923	SUB1	NM_006713	88.03	83.75	79.05	96.66	75.98	62.71	68.02	69.97	81.81	66.96	SUB1 homolog, transcriptional regulator
829	CAPZA1	NM_006135	89.43	83.68	83.35	95.54	79.02	121.21	118.23	123.41	121.39	118.39	capping actin protein of muscle Z-line alpha subunit 1
4695	NDUFA2	NM_001185012,NM_002488	66.08	83.67	91.97	92.4	85.88	71.7	74.09	77.82	93.74	77.61	NADH:ubiquinone oxidoreductase subunit A2
10983	CCNI	NM_001348132,NM_001348133,NM_001348134,NM_001348135,NM_001348136,NM_001348137,NM_001348138,NM_001348139,NM_001348140,NM_006835	98.71	83.43	92.23	71.43	90.57	128.3	138.78	126.14	132.08	124.86	cyclin I
10572	SIVA1	NM_006427,NM_021709	81.3	83.37	73.62	80.94	63.72	49.88	52.54	47.71	57.62	47.45	SIVA1 apoptosis inducing factor
51374	ATRAID	NM_001170795,NM_016085,NM_080592	86.62	83.36	104.33	78.99	101.24	105.66	82.29	96.62	83.47	92.26	all-trans retinoic acid induced differentiation factor
4678	NASP	NM_001195193,NM_002482,NM_152298	106.88	83.33	80.51	88.78	61.94	85.77	95.87	84.84	100.21	87.35	nuclear autoantigenic sperm protein
10169	SERF2	NM_001018108,NM_001199875,NM_001199876,NM_001199877,NM_001199878	66.48	83.3	99.68	83.96	104.71	83.71	82.5	76.64	95.98	77.27	small EDRK-rich factor 2
30846	EHD2	NM_014601	61.18	83.09	72.29	81.98	76.68	28.98	32.13	31.89	25.17	28.18	EH domain containing 2
10980	COPS6	NM_006833	66.35	82.91	82.97	101.29	66.65	109.9	123.33	125.1	139.66	131.98	COP9 signalosome subunit 6
2987	GUK1	NM_000858,NM_001159390,NM_001159391,NM_001242839,NM_001242840	72.3	82.88	80.84	86.89	84.73	175.79	181.4	195.26	221.87	208.75	guanylate kinase 1
9520	NPEPPS	NM_001330257,NM_006310	77.43	82.72	74.55	89.32	70.17	39.34	39.23	41.55	36.06	38.24	aminopeptidase puromycin sensitive
79921	TCEAL4	NM_001006935,NM_001006937,NM_001300901,NM_001305840,NM_001305841,NM_001305842,NM_024863	80.94	82.61	87.4	93.31	82.16	113.44	120.6	109.64	131.82	112.84	transcription elongation factor A like 4
54940	OCIAD1	NM_001079839,NM_001079840,NM_001079841,NM_001079842,NM_001168254,NM_017830	94.38	82.59	95.65	83.91	99.79	76.37	72.58	78.1	72.98	75.33	OCIA domain containing 1
5690	PSMB2	NM_001199779,NM_001199780,NM_002794	85.18	82.54	75.4	81.83	61.61	93.31	89.49	97.6	96.63	95.75	proteasome subunit beta 2
54939	COMMD4	NM_001284377,NM_001284378,NM_001284379,NM_001321844,NM_001321845,NM_001321846,NM_001321847,NM_001321848,NM_017828	71.19	82.49	64.68	86.04	50.98	69.59	73.42	79.46	83.68	75.31	COMM domain containing 4
79001	VKORC1	NM_001311311,NM_024006,NM_206824	70.46	82.49	84.52	93.87	80	70.62	75.82	85.93	89.64	89.83	vitamin K epoxide reductase complex subunit 1
22827	PUF60	NM_001136033,NM_001271096,NM_001271097,NM_001271098,NM_001271099,NM_001271100,NM_014281,NM_078480	73.52	82.41	69.43	78.36	63.35	125.89	121.66	116.88	102.91	113.44	poly(U) binding splicing factor 60
5713	PSMD7	NM_002811	90.7	82.39	88.57	62.33	81.84	104.39	109.67	104.23	95.83	91.62	proteasome 26S subunit, non-ATPase 7
58472	SQOR	NM_001271213,NM_021199	54.02	82.3	78.44	80.9	69.06	77.61	80.5	80.24	86.85	87.06	sulfide quinone oxidoreductase
3106	HLA-B	NM_005514	51.33	82.29	454.93	83.48	1192.15	74.61	60.76	102.86	74.87	142.85	major histocompatibility complex, class I, B
54976	C20orf27	NM_001039140,NM_001258429,NM_001258430	86.11	82.26	57.09	87.38	49.97	42.96	43.66	37.92	43.79	39.8	chromosome 20 open reading frame 27
86	ACTL6A	NM_004301,NM_177989,NM_178042	79.42	82.1	79.51	93.38	64.8	57.18	63.56	70.08	65.81	69.64	actin like 6A
6632	SNRPD1	NM_001291916,NM_006938	96.02	81.99	68.13	85.66	51.79	93.48	96.4	84.75	90.85	87.33	small nuclear ribonucleoprotein D1 polypeptide
80347	COASY	NM_001042529,NM_001042532,NM_025233	62.09	81.9	74.3	69.51	68.82	59.93	66.38	62.46	61.69	62.23	Coenzyme A synthase
6992	PPP1R11	NM_021959	74.21	81.88	83.2	84.08	99.71	72.4	67.23	78.66	63.43	77.24	protein phosphatase 1 regulatory inhibitor subunit 11
2181	ACSL3	NM_001354158,NM_001354159,NM_004457,NM_203372	76.91	81.88	75.52	84.54	64.12	31.11	28.37	33.09	27.26	34.89	acyl-CoA synthetase long chain family member 3
4717	NDUFC1	NM_001184986,NM_001184987,NM_001184988,NM_001184989,NM_001184990,NM_001184991,NM_002494	69.32	81.69	67.12	86.47	61.59	75.11	78.55	82.95	89.96	80.98	NADH:ubiquinone oxidoreductase subunit C1
57092	PCNP	NM_001320395,NM_001320397,NM_001320398,NM_001320399,NM_001320400,NM_001320401,NM_020357	77.24	81.42	76.86	92.52	74.6	54.14	59.5	61.79	65	63.17	PEST proteolytic signal containing nuclear protein
1665	DHX15	NM_001358	102.41	81.27	84.54	68.97	65	90.43	84.75	74	65.72	67.56	DEAH-box helicase 15
51647	FAM96B	NM_016062	72.9	81.24	63.15	70.37	77.37	69.43	69.29	68.92	85.36	70.07	family with sequence similarity 96 member B
56731	SLC2A4RG	NM_020062	61.39	81.23	70.39	76.77	61.65	79.66	102.76	87.47	90.67	86.84	SLC2A4 regulator
994	CDC25B	NM_001287516,NM_001287517,NM_001287518,NM_001287519,NM_001287520,NM_001287522,NM_001287524,NM_004358,NM_021872,NM_021873	80.41	81.21	100.21	73.35	140.37	93.87	92.31	82.03	76.44	80.17	cell division cycle 25B
50854	C6orf48	NM_001040437,NM_001040438,NM_001287482,NM_001287483,NM_001287484,NM_001287485,NM_001287486,NM_001287487,NM_001287488	71.65	81.13	103.7	65.6	125.7	151.79	122.9	142.09	116.73	157.62	chromosome 6 open reading frame 48
388610	TRNP1	NM_001013642	63.9	81.1	93.75	91.93	91.38	112.37	113.14	101.28	89.05	94.34	TMF1-regulated nuclear protein 1
3422	IDI1	NM_001317955,NM_001317956,NM_001317957,NM_004508	68.75	80.99	59.78	113.12	44.54	45.4	54.89	66.57	93.77	67.41	isopentenyl-diphosphate delta isomerase 1
7415	VCP	NM_001354927,NM_001354928,NM_007126	82.98	80.94	80.74	81.55	67.53	182.08	196.65	186.79	201.06	175.84	valosin containing protein
90480	GADD45GIP1	NM_052850	73.72	80.91	67.57	82.54	69.6	87.17	88.59	93.25	93.07	97.17	GADD45G interacting protein 1
25796	PGLS	NM_012088	64.78	80.86	77.62	73.68	83.52	49.95	50.1	43.53	45.18	42.03	6-phosphogluconolactonase
2130	EWSR1	NM_001163285,NM_001163286,NM_001163287,NM_005243,NM_013986	96.14	80.75	80.5	74.79	67.55	88.28	84.3	84.46	84.25	82.95	EWS RNA binding protein 1
9052	GPRC5A	NM_003979	127.78	80.75	70.45	77.87	65.3	65.94	57.43	52.25	48.01	47.99	G protein-coupled receptor class C group 5 member A
29081	METTL5	NM_001293186,NM_001293187,NM_014168	76.16	80.68	65.04	85.8	49.62	45.69	45.82	46.93	45.9	48.67	methyltransferase like 5
58505	OSTC	NM_001267817,NM_001267818,NM_021227	91.66	80.64	87.87	91.7	89.02	120.86	130.52	118.69	137.06	116.69	oligosaccharyltransferase complex non-catalytic subunit
8678	BECN1	NM_001313998,NM_001313999,NM_001314000,NM_003766	80.66	80.59	83.49	84.78	91.69	27.74	26.93	30.79	28.76	31.72	beclin 1
513	ATP5F1D	NM_001001975,NM_001687	77.25	80.45	60.74	72.1	54.95	101.26	108.69	89.15	110.3	99.57	ATP synthase F1 subunit delta
6944	VPS72	NM_001271087,NM_001271088,NM_005997	67.66	80.4	69.31	86.05	76.71	41.4	49.37	46.25	40.83	49.55	vacuolar protein sorting 72 homolog
9802	DAZAP2	NM_001136264,NM_001136266,NM_001136267,NM_001136268,NM_001136269,NM_014764	67.67	80.39	85.91	88.26	104.59	162.98	160.19	176.03	158.52	176.44	DAZ associated protein 2
103	ADAR	NM_001025107,NM_001111,NM_001193495,NM_015840,NM_015841	67.32	80.39	95.06	76.81	112.31	39.96	40.98	42.55	43.32	45.01	adenosine deaminase, RNA specific
79073	TMEM109	NM_024092	70.81	80.31	72.65	76.93	63.5	40.5	39.77	38.71	37.63	41.76	transmembrane protein 109
3428	IFI16	NM_001206567,NM_005531	45.87	80.01	140.7	81	195.05	15.7	13.99	19.92	12.96	21.68	interferon gamma inducible protein 16
9341	VAMP3	NM_004781	92.75	79.81	89.27	83.86	91.8	68.82	51.98	63.02	56.7	63.64	vesicle associated membrane protein 3
11171	STRAP	NM_007178	100.31	79.59	75.22	78.68	63.17	212.61	200.14	198.65	201.07	198.68	serine/threonine kinase receptor associated protein
8260	NAA10	NM_001256119,NM_001256120,NM_003491	75.72	79.58	73.29	84.13	58.14	102.67	98.27	104.83	105.09	105.92	N(alpha)-acetyltransferase 10, NatA catalytic subunit
51329	ARL6IP4	NM_001002251,NM_001002252,NM_001278378,NM_001278379,NM_001278380,NM_016638,NM_018694	65.78	79.57	63.04	82.28	55.94	71.03	84.14	75.2	90.96	78.17	ADP ribosylation factor like GTPase 6 interacting protein 4
375790	AGRN	NM_001305275,NM_198576	59.42	79.53	78.8	72.19	110.4	40.82	46.77	42.79	46.49	43.09	agrin
898	CCNE1	NM_001238,NM_001322259,NM_001322261,NM_001322262	66.58	79.52	55.93	105.93	47.94	14.6	15.56	15.01	20.51	16.43	cyclin E1
4172	MCM3	NM_001270472,NM_002388	71.87	79.44	75.79	91.89	57.56	64.06	67.27	63.6	56.21	66.43	minichromosome maintenance complex component 3
4833	NME4	NM_001286433,NM_001286435,NM_001286436,NM_001286438,NM_001286439,NM_001286440,NM_005009	68.08	79.43	67.48	74.46	65.36	91.38	114.4	78.99	125.31	74.99	NME/NM23 nucleoside diphosphate kinase 4
8813	DPM1	NM_001317034,NM_001317035,NM_001317036,NM_003859	84.67	79.4	69.6	89.29	61.05	75.82	82.18	74.65	86.63	77.37	dolichyl-phosphate mannosyltransferase subunit 1, catalytic
2150	F2RL1	NM_005242	89.34	79.34	96.71	87.35	104.2	67.22	52.1	63.94	42.62	55.91	F2R like trypsin receptor 1
5010	CLDN11	NM_001185056,NM_005602	90.9	79.23	92.78	78.71	86.72	0	0.07	0.05	0.14	0.11	claudin 11
223	ALDH9A1	NM_000696	81.45	79.19	88.38	83.89	86.42	35.8	38.42	36.94	47.67	43.22	aldehyde dehydrogenase 9 family member A1
84418	CYSTM1	NM_032412	72	79.15	76.43	88.33	106.61	50.87	37.32	54.4	44.88	52	cysteine rich transmembrane module containing 1
23451	SF3B1	NM_001005526,NM_001308824,NM_012433	85.98	79.09	76.99	77.52	75.39	67.21	67.62	65.06	65.99	64.56	splicing factor 3b subunit 1
6945	MLX	NM_170607,NM_198204,NM_198205	75.99	79.07	69.72	85.59	68.87	46.6	40.42	43.22	38	43.74	MLX, MAX dimerization protein
10897	YIF1A	NM_001300861,NM_020470	65.21	78.99	81.67	85.46	81.06	81.29	84.8	90.84	99.71	98.13	Yip1 interacting factor homolog A, membrane trafficking protein
11056	DDX52	NM_001291476,NM_007010	92.76	78.73	85.99	82.39	80.71	15.26	14.87	13.94	14.97	13.75	DExD-box helicase 52
84335	AKT1S1	NM_001098632,NM_001098633,NM_001278159,NM_001278160,NM_032375	78.42	78.7	78.53	83.5	90.86	68.65	59.47	55.72	50.66	49.87	AKT1 substrate 1
7936	NELFE	NM_002904	70.59	78.46	76.53	79.13	66.88	73.99	73.33	86.45	77.23	92.25	negative elongation factor complex member E
25870	SUMF2	NM_001042469,NM_001042470,NM_001130069,NM_001146333,NM_015411	57.53	78.45	74.9	88.25	71.86	64.92	65.68	73.04	78.84	82.84	sulfatase modifying factor 2
5536	PPP5C	NM_001204284,NM_006247	66.35	78.36	71.31	77.8	66.14	42.91	39.64	45.45	41.53	46.39	protein phosphatase 5 catalytic subunit
5984	RFC4	NM_002916,NM_181573	63.42	78.31	63.45	89.04	51.21	46.51	54.65	55.5	50.78	53.25	replication factor C subunit 4
51669	SARAF	NM_001284239,NM_016127	76.28	78.22	100.96	85.21	128.68	65.28	62.07	69.34	74.3	71.71	store-operated calcium entry associated regulatory factor
6626	SNRPA	NM_004596	98.86	78.07	69.88	65.77	53.27	81.52	83.42	71.02	75.14	66.47	small nuclear ribonucleoprotein polypeptide A
3304	HSPA1B	NM_005346	84.2	77.93	89.82	72.05	99.61	103.14	181.89	163.81	195.51	165.14	heat shock protein family A (Hsp70) member 1B
10554	AGPAT1	NM_006411,NM_032741	65.71	77.92	76.96	97.01	80.61	75.98	75.21	78.93	73.87	84.32	1-acylglycerol-3-phosphate O-acyltransferase 1
7389	UROD	NM_000374	55.22	77.91	91.23	84.9	75.58	44.45	41.12	42.83	49.85	46.83	uroporphyrinogen decarboxylase
79080	CCDC86	NM_024098	87.43	77.84	62.17	73.31	57.28	85.2	73.71	71.01	70.83	68.81	coiled-coil domain containing 86
1719	DHFR	NM_000791,NM_001290354,NM_001290357	63.98	77.71	61.6	98.5	44.24	65.4	82.98	86.22	98.58	94.65	dihydrofolate reductase
153527	ZMAT2	NM_144723	72.11	77.71	74.31	86.19	79.16	69.84	64.68	66.79	74.82	68	zinc finger matrin-type 2
8520	HAT1	NM_003642	78.95	77.68	74.67	81.34	64.17	51.11	53.9	54.97	52.69	55.97	histone acetyltransferase 1
284361	EMC10	NM_175063,NM_206538	68.69	77.61	90.01	79.75	103.83	81.8	73.38	80.35	76.03	84.86	ER membrane protein complex subunit 10
7979	SEM1	NM_001201450,NM_001201451,NM_001349698,NM_001349700,NM_001349701,NM_001349702,NM_006304	71.18	77.5	66.97	83.38	60.29	131.04	130.42	135.14	170.92	132.59	SEM1, 26S proteasome complex subunit
1965	EIF2S1	NM_004094	96.98	77.47	69.95	82.42	61.25	34.66	29.87	30.85	31.26	31.75	eukaryotic translation initiation factor 2 subunit alpha
2107	ETF1	NM_001256302,NM_001282185,NM_001291974,NM_001291975,NM_004730	128.2	77.44	75.25	73.96	70.36	83.57	63.26	66.38	60.93	66.02	eukaryotic translation termination factor 1
51668	HSPB11	NM_001316935,NM_016126	82.08	77.42	75.91	92.91	66.54	71.24	71.94	92.23	98.2	90.84	heat shock protein family B (small) member 11
9352	TXNL1	NM_004786	94.18	77.37	75.37	78.86	70.16	74.54	74.08	70.83	75.92	70.11	thioredoxin like 1
80764	THAP7	NM_001008695,NM_030573	47.02	77.26	53.76	75.94	48.93	41.1	37.1	38.96	31.23	41.42	THAP domain containing 7
7514	XPO1	NM_003400	87.77	77.16	68.12	61.76	62.81	77.88	75.79	65.98	55.27	59.52	exportin 1
3251	HPRT1	NM_000194	82.03	77	75.22	83.7	59.42	83.61	97.69	95.1	105.35	91.65	hypoxanthine phosphoribosyltransferase 1
10567	RABAC1	NM_006423	53.73	76.98	74.93	72.66	86.09	58.25	44.02	49.72	46.87	55.72	Rab acceptor 1
27075	TSPAN13	NM_014399	78.67	76.97	75.16	83.05	58.75	17.17	21	19.16	24.15	19.45	tetraspanin 13
975	CD81	NM_001297649,NM_004356	77.22	76.86	81.41	74.32	87.61	157.87	193.66	165.44	204.44	153.76	CD81 molecule
10938	EHD1	NM_001282444,NM_001282445,NM_006795	73.33	76.81	73.2	74.3	90.4	56.69	49.29	45.82	36.37	46.23	EH domain containing 1
8612	PLPP2	NM_003712,NM_177526,NM_177543	70.65	76.79	72.94	72.06	76.19	75.57	87.31	79.25	84.78	75.87	phospholipid phosphatase 2
9076	CLDN1	NM_021101	102.7	76.63	78.82	84.3	84.6	60.12	49.9	41.57	47.95	48.35	claudin 1
51248	PDZD11	NM_016484	68.52	76.57	75.66	88.72	73.11	89.67	95.68	100.79	114.59	107.79	PDZ domain containing 11
29796	UQCR10	NM_001003684,NM_013387	61.25	76.52	72.8	80.83	66.91	46.69	40.96	51.4	59.65	54.22	ubiquinol-cytochrome c reductase, complex III subunit X
22938	SNW1	NM_001318844,NM_012245	68.88	76.51	71.65	80.13	69.78	43.38	47.37	46.7	42.83	45.96	SNW domain containing 1
1969	EPHA2	NM_001329090,NM_004431	83.99	76.47	62.81	64.03	66.15	74.03	59.15	67.13	53.16	66.21	EPH receptor A2
10768	AHCYL1	NM_001242673,NM_001242674,NM_001242675,NM_001242676,NM_006621	59.78	76.26	66.75	81.19	57.28	51.25	58.99	60.19	65.89	61.55	adenosylhomocysteinase like 1
55573	CDV3	NM_001134422,NM_001134423,NM_001282762,NM_001282763,NM_001282764,NM_001282765,NM_017548	123.14	76.25	80.18	68.7	73.61	89.77	75.57	71.52	65.06	73.58	CDV3 homolog
5440	POLR2K	NM_005034	82.78	76.23	81.4	88.84	88.52	62.93	51.31	68.04	64.88	69.76	RNA polymerase II subunit K
84545	MRPL43	NM_001308396,NM_032112,NM_176792,NM_176793,NM_176794	63.32	76.19	64.93	74.87	57.04	66.76	64.56	66.1	65.07	69.85	mitochondrial ribosomal protein L43
3654	IRAK1	NM_001025242,NM_001025243,NM_001569	84.14	76.16	58.83	71.26	55.68	157.6	178.31	187.52	184.14	194.82	interleukin 1 receptor associated kinase 1
115024	NT5C3B	NM_052935	61.03	76.12	59.08	78.8	52.2	34.72	39.63	39.24	43.16	38.76	5'-nucleotidase, cytosolic IIIB
5037	PEBP1	NM_002567	66.98	76.05	67.43	87.18	65.51	153.84	164.84	153.7	180.29	150.87	phosphatidylethanolamine binding protein 1
37	ACADVL	NM_000018,NM_001033859,NM_001270447,NM_001270448	54.78	75.98	74.07	80.45	84.52	99.56	95.86	115.82	115.5	133.56	acyl-CoA dehydrogenase very long chain
5527	PPP2R5C	NM_001161725,NM_001161726,NM_001352912,NM_001352913,NM_001352914,NM_001352915,NM_001352916,NM_002719,NM_178586,NM_178587	84.41	75.91	83.07	73.17	78.23	75.02	71.2	67.11	55.34	62.35	protein phosphatase 2 regulatory subunit B'gamma
2617	GARS	NM_001316772,NM_002047	85.85	75.87	80.45	74.69	85.51	81.51	81.63	84.27	89.21	93.51	glycyl-tRNA synthetase
2521	FUS	NM_001170634,NM_001170937,NM_004960	81.92	75.79	48.06	76.83	42.52	66.24	63.64	54.35	64.8	53.99	FUS RNA binding protein
1457	CSNK2A1	NM_001895,NM_177559,NM_177560	95.86	75.71	77.4	76.11	79.22	38.76	34.29	34.33	30.64	35.54	casein kinase 2 alpha 1
22803	XRN2	NM_001317960,NM_012255	76.21	75.7	78.34	74.18	67.51	29.24	28.22	28.64	27.71	28.56	5'-3' exoribonuclease 2
7317	UBA1	NM_003334,NM_153280	64.39	75.34	70.05	74.27	71.58	134.14	146.61	139.09	153.83	146.93	ubiquitin like modifier activating enzyme 1
8733	GPAA1	NM_003801	66.16	75.3	66.83	76.43	68.21	79.53	85.38	85.04	89.97	87.64	glycosylphosphatidylinositol anchor attachment 1
55845	BRK1	NM_018462	65.58	75.25	90.05	89.52	92.86	48.5	41.55	51.5	53.51	57.65	BRICK1, SCAR/WAVE actin nucleating complex subunit
81618	ITM2C	NM_001012514,NM_001012516,NM_001287240,NM_001287241,NM_030926	53.74	75.12	85.07	81.45	105.79	36.3	35.62	42.95	41.2	46.89	integral membrane protein 2C
6389	SDHA	NM_001294332,NM_001330758,NM_004168	66.38	75.07	59.07	77.33	51.64	96.54	103.02	90.48	106.57	91.01	succinate dehydrogenase complex flavoprotein subunit A
6648	SOD2	NM_000636,NM_001024465,NM_001024466,NM_001322814,NM_001322815,NM_001322816,NM_001322817,NM_001322819,NM_001322820	41.36	75	122.08	93.05	245.89	19.67	18.31	21.95	21.1	26.81	superoxide dismutase 2
2937	GSS	NM_000178,NM_001322494,NM_001322495	57.88	74.91	59.5	90.44	57.71	75.01	77.36	86.84	91.28	88.64	glutathione synthetase
6426	SRSF1	NM_001078166,NM_006924	93.57	74.88	67.65	62.87	51.29	82.08	77.12	61.75	63.21	58.84	serine and arginine rich splicing factor 1
1164	CKS2	NM_001827	100.79	74.88	83.6	69.23	60.64	146.01	159.81	173.28	182.43	161.04	CDC28 protein kinase regulatory subunit 2
1912	PHC2	NM_001330488,NM_004427,NM_198040	63.85	74.84	78.39	65.08	92.51	94.98	77.76	77.87	60.18	77	polyhomeotic homolog 2
51060	TXNDC12	NM_015913	82.57	74.79	70.35	87.72	66.28	48.31	54.31	51.9	57	50.9	thioredoxin domain containing 12
8833	GMPS	NM_003875	85.31	74.73	61.28	77.07	42.26	99.18	101.4	95.58	87.92	92.72	guanine monophosphate synthase
90861	JPT2	NM_144570	83.08	74.68	75.56	75.56	66.36	72.51	83.52	75.71	86.51	71.58	Jupiter microtubule associated homolog 2
112770	GLMP	NM_001256604,NM_001256605,NM_001256608,NM_001256609,NM_144580	63.07	74.61	78.57	76.2	106.05	25.26	22.94	23.9	21.98	27.44	glycosylated lysosomal membrane protein
81611	ANP32E	NM_001136478,NM_001136479,NM_001280559,NM_001280560,NM_030920	87.99	74.6	71.97	75.66	51.42	46.91	54.59	54.1	50.79	53.4	acidic nuclear phosphoprotein 32 family member E
1469	CST1	NM_001898	22.84	74.58	234.12	72.87	573.74	124.54	54.83	60.79	53.54	78.6	cystatin SN
1854	DUT	NM_001025248,NM_001025249,NM_001330286,NM_001948	74.74	74.42	58.66	77.34	40.86	62.03	71.27	70.94	69.18	66.2	deoxyuridine triphosphatase
26519	TIMM10	NM_012456	88.8	74.38	63.83	69.64	50.82	53.06	50.89	45.02	41.78	44.64	translocase of inner mitochondrial membrane 10
26528	DAZAP1	NM_001352033,NM_001352034,NM_001352035,NM_018959,NM_170711	70.24	74.35	61	64.49	51.27	101.87	114.37	99.13	110.19	94.26	DAZ associated protein 1
10195	ALG3	NM_001006941,NM_005787	61.45	74.33	72.08	74.95	67.43	65.05	61.29	67.04	70.87	71.35	ALG3, alpha-1,3- mannosyltransferase
79077	DCTPP1	NM_024096	78.46	74.21	59.43	75.59	54	79.04	82.7	68.51	84.27	70.43	dCTP pyrophosphatase 1
26579	MYEOV	NM_001293291,NM_001293294,NM_001293296,NM_001300923,NM_001300924,NM_138768	61.5	74.16	61.78	61.27	65.29	103.61	83.6	84.4	63.34	85.73	myeloma overexpressed
79095	C9orf16	NM_024112	44.96	73.99	124.96	82.28	186.3	48.91	49.33	47.09	60.62	50.18	chromosome 9 open reading frame 16
10946	SF3A3	NM_001320830,NM_006802	73.61	73.99	66.92	80.82	52.25	66.45	75.16	68.68	71.97	71.42	splicing factor 3a subunit 3
7169	TPM2	NM_001301226,NM_001301227,NM_003289,NM_213674	72.87	73.97	87.89	79.84	75.73	171	180.72	180.75	208.98	183.77	tropomyosin 2
29087	THYN1	NM_001037304,NM_001037305,NM_014174,NM_199297,NM_199298	69.08	73.92	80.36	77.01	63.37	60.29	55.74	64.41	57	59.36	thymocyte nuclear protein 1
637	BID	NM_001196,NM_001244567,NM_001244569,NM_001244570,NM_001244572,NM_197966,NM_197967	67.89	73.89	73.91	78.36	75.56	48.4	52.82	49.98	54.3	46.32	BH3 interacting domain death agonist
6513	SLC2A1	NM_006516	106.01	73.78	88.42	60.87	90.27	79.46	67.28	67.59	54.83	63.81	solute carrier family 2 member 1
3241	HPCAL1	NM_001258357,NM_001258358,NM_001258359,NM_002149,NM_134421	67.25	73.47	89.82	50.81	144.69	225.89	149.09	184.48	115.09	194.29	hippocalcin like 1
10534	SSSCA1	NM_001303024,NM_006396	71.25	73.32	64.2	64.16	57.21	76.04	70.67	65.99	59.65	67.22	Sjogren syndrome/scleroderma autoantigen 1
311	ANXA11	NM_001157,NM_001278407,NM_001278408,NM_001278409,NM_145868,NM_145869	77.13	73.19	72.51	70.87	66.35	121.88	132.28	120.02	110.5	118.31	annexin A11
1778	DYNC1H1	NM_001376	75.65	73.18	57.02	64.77	56.65	31.79	31.27	34.07	30.55	35.1	dynein cytoplasmic 1 heavy chain 1
64976	MRPL40	NM_001318151,NM_001318152,NM_003776	86.2	73.15	80.63	76.77	76.26	63.94	54.58	59.27	57.9	61.81	mitochondrial ribosomal protein L40
9221	NOLC1	NM_001284388,NM_001284389,NM_004741	102.2	73.14	59.47	79.97	49.2	72.29	71.09	64.82	71.44	66.99	nucleolar and coiled-body phosphoprotein 1
6774	STAT3	NM_003150,NM_139276,NM_213662	60.23	73.1	86.19	74.81	94.01	28.13	23.88	28.41	20.93	27.42	signal transducer and activator of transcription 3
10092	ARPC5	NM_001270439,NM_005717	69.85	73	78.56	83.79	77.7	82.47	77.36	99.87	82.3	99.51	actin related protein 2/3 complex subunit 5
6892	TAPBP	NM_003190,NM_172208,NM_172209	45.27	72.96	94.44	76.52	107.59	72.91	67.63	72.24	72.08	74.91	TAP binding protein
9669	EIF5B	NM_015904	91.83	72.94	66.38	76.51	55.32	68.73	67.91	61.54	72.29	62.85	eukaryotic translation initiation factor 5B
7048	TGFBR2	NM_001024847,NM_003242	84.85	72.9	81.34	60.73	82.98	14.11	12.55	11.71	9.68	11.21	transforming growth factor beta receptor 2
124995	MRPL10	NM_145255,NM_148887	53.88	72.86	62.31	72.26	60.24	35.54	36.29	37.15	37.82	36.72	mitochondrial ribosomal protein L10
48	ACO1	NM_001278352,NM_002197	73.92	72.85	70.29	82.06	46.52	35.56	29.37	37.87	31.77	40.71	aconitase 1
28974	C19orf53	NM_014047	75.92	72.84	60.18	78.57	56.71	89.92	87.79	95.29	91.68	91.89	chromosome 19 open reading frame 53
8607	RUVBL1	NM_001319084,NM_001319086,NM_003707	85.31	72.82	63.78	73.83	46.41	63.73	59.48	62.7	59	59.88	RuvB like AAA ATPase 1
85236	HIST1H2BK	NM_001312653,NM_080593	80.95	72.79	165.85	69.55	287.57	53.39	33.2	38.8	35.59	41.43	histone cluster 1 H2B family member k
6303	SAT1	NM_002970	54.89	72.72	109.2	71.72	159.31	62.86	45.79	51.54	49.33	57.35	spermidine/spermine N1-acetyltransferase 1
8725	URI1	NM_001252641,NM_003796	79.19	72.71	72.68	72.42	67.98	15.37	13.78	12.92	12.72	13.38	URI1, prefoldin like chaperone
9123	SLC16A3	NM_001042422,NM_001042423,NM_001206950,NM_001206951,NM_001206952,NM_004207	72.11	72.66	67.99	47.44	71.34	43.13	50.36	47.16	69.42	49.65	solute carrier family 16 member 3
54997	TESC	NM_001168325,NM_017899	35.18	72.56	80.42	63.31	78.96	83.53	53.78	76.93	53.93	70.98	tescalcin
23555	TSPAN15	NM_001351263,NM_012339	65.48	72.48	80.28	65.15	80.52	11.78	12.8	12.33	11.13	11.59	tetraspanin 15
60481	ELOVL5	NM_001242828,NM_001242830,NM_001242831,NM_001301856,NM_021814	79.37	72.45	90.49	72.4	66.52	94.55	85.03	89.17	76.31	89.31	ELOVL fatty acid elongase 5
2069	EREG	NM_001432	106.02	72.36	48.14	68.35	63.17	163.72	120.02	132.03	91.31	118.66	epiregulin
8826	IQGAP1	NM_003870	73.88	72.31	80.77	71.94	78.34	50.34	51.74	54.2	51.97	53.36	IQ motif containing GTPase activating protein 1
23788	MTCH2	NM_001317231,NM_001317232,NM_001317233,NM_014342	62.69	72.3	66.44	82.53	63.43	64.85	66.11	74.96	79.3	75.65	mitochondrial carrier 2
16	AARS	NM_001605	59.86	72.29	70.12	70.75	95.55	72.38	80.31	95.11	76.91	91.06	alanyl-tRNA synthetase
3912	LAMB1	NM_002291	74.1	72.1	74.97	66.06	53.28	52	53.05	48.85	48.7	51.1	laminin subunit beta 1
4836	NMT1	NM_021079	68.88	72.08	73.73	74.46	71.54	46.34	44.41	44.68	40.75	44.79	N-myristoyltransferase 1
10063	COX17	NM_005694	80.29	72.08	77.44	80.67	71.18	104.23	100.04	123.61	101.16	115.2	COX17, cytochrome c oxidase copper chaperone
10956	OS9	NM_001017956,NM_001017957,NM_001017958,NM_001261420,NM_001261421,NM_001261422,NM_001261423,NM_006812	59.86	72.03	95.54	80.07	121.31	154.46	148.69	159.58	163.11	170.76	OS9, endoplasmic reticulum lectin
310	ANXA7	NM_001156,NM_001320879,NM_001320880,NM_004034	68.13	71.92	68.08	78.14	67.28	70.07	75.03	75.87	76.37	75.31	annexin A7
51119	SBDS	NM_016038	79.92	71.87	71.4	76.45	83.89	79.55	72.45	78.75	84.84	79.7	SBDS, ribosome maturation factor
8775	NAPA	NM_003827	65.33	71.78	72.95	75.62	103.14	69.95	58	67.03	64.41	69.48	NSF attachment protein alpha
55011	PIH1D1	NM_017916	65.31	71.75	68.51	67.31	56.84	37.56	43.53	42.78	46.66	44.81	PIH1 domain containing 1
23435	TARDBP	NM_007375	74.72	71.71	58.99	82.12	48.95	74.26	73.39	70.37	72.39	68.08	TAR DNA binding protein
8531	YBX3	NM_001145426,NM_003651	79	71.71	67.57	78.82	66.52	195.08	197.07	205.63	201.78	214.33	Y-box binding protein 3
2644	GCHFR	NM_005258	38.84	71.58	71.73	73.11	61.72	127.31	58.84	117.2	70.2	120.46	GTP cyclohydrolase I feedback regulator
51495	HACD3	NM_016395	75.43	71.52	80.25	73.91	79.52	69.27	71.08	69.71	78.17	67.79	3-hydroxyacyl-CoA dehydratase 3
7264	TSTA3	NM_001317783,NM_003313	67.11	71.45	71.71	73.39	57.5	47.11	53.39	46.35	61.49	51.83	tissue specific transplantation antigen P35B
6629	SNRPB2	NM_003092,NM_198220	94.79	71.43	69.66	82.06	63.4	34.83	36.97	34.96	43.72	36.41	small nuclear ribonucleoprotein polypeptide B2
27020	NPTN	NM_001161363,NM_001161364,NM_012428,NM_017455	84.26	71.33	81.05	71.42	88.56	45.78	41.48	44.49	39.33	42.59	neuroplastin
81831	NETO2	NM_001201477,NM_018092	67.15	71.33	79.5	78.32	69.41	58.19	57.15	66.11	65.39	63.82	neuropilin and tolloid like 2
10096	ACTR3	NM_001277140,NM_005721	75.1	71.31	83.67	74.08	83.22	58.8	57.62	59.66	56.48	55.95	ARP3 actin related protein 3 homolog
6182	MRPL12	NM_002949	73.58	71.28	56.42	48.05	41.12	115.2	108.87	103.87	100.92	103.41	mitochondrial ribosomal protein L12
10360	NPM3	NM_006993	63.83	71.1	57.28	74.38	44.87	58.76	64.94	62.55	76.27	61.91	nucleophosmin/nucleoplasmin 3
51255	RNF181	NM_016494	59.27	71.07	81.99	87.37	86.62	65.15	62.97	60.57	68.48	64.23	ring finger protein 181
51094	ADIPOR1	NM_001290553,NM_001290557,NM_001290629,NM_015999	71.8	70.99	67.03	82.45	73.64	67.77	60.38	72.42	70.12	78.2	adiponectin receptor 1
3486	IGFBP3	NM_000598,NM_001013398	75.98	70.97	127.18	65.39	223.93	5.63	4.74	4.5	5.21	6.93	insulin like growth factor binding protein 3
4076	CAPRIN1	NM_005898,NM_203364	92.09	70.76	77.28	66.46	69.53	108.07	99.91	94.78	91.49	91.57	cell cycle associated protein 1
1212	CLTB	NM_001834,NM_007097	78.16	70.73	72.06	75.25	84.34	90.34	86.02	91.3	94.41	90.73	clathrin light chain B
7917	BAG6	NM_001098534,NM_001199697,NM_001199698,NM_004639,NM_080702,NM_080703	63.57	70.72	67.83	65.32	72.38	94.42	94.05	91.63	85.66	97.5	BCL2 associated athanogene 6
6430	SRSF5	NM_001039465,NM_001320214,NM_006925	87.2	70.64	89.05	55.89	100.97	76.11	63.16	54.63	49.64	54.93	serine and arginine rich splicing factor 5
10477	UBE2E3	NM_001278554,NM_001278555,NM_006357,NM_182678	89.57	70.53	90.92	66.23	86.73	54.98	42.32	44.16	38.46	45.56	ubiquitin conjugating enzyme E2 E3
64065	PERP	NM_022121	68.07	70.52	79.17	77.13	92.14	181.05	156.64	205	167.41	204.11	PERP, TP53 apoptosis effector
30968	STOML2	NM_001287031,NM_001287032,NM_001287033,NM_013442	75.95	70.5	62.3	69.07	54.42	107.67	114.14	112.26	124.51	111.34	stomatin like 2
10460	TACC3	NM_006342	79.95	70.49	64.23	70.09	46.23	99.39	105.03	108.42	90.21	98.78	transforming acidic coiled-coil containing protein 3
128	ADH5	NM_000671	73.26	70.4	59.47	79.52	51.73	59.26	63.23	64.62	72.82	63.03	alcohol dehydrogenase 5 (class III), chi polypeptide
51373	MRPS17	NM_015969	73.96	70.37	57.7	67.36	38.94	43.89	51.67	47.53	66.07	45.65	mitochondrial ribosomal protein S17
4924	NUCB1	NM_006184	49.11	70.25	75.46	69.57	95.78	43.33	43.05	43.98	44.13	46.4	nucleobindin 1
56993	TOMM22	NM_020243	78.11	70.24	56.38	74.79	43.77	52.57	56.84	53.48	58.74	51.76	translocase of outer mitochondrial membrane 22
8761	PABPC4	NM_001135653,NM_001135654,NM_003819	113.09	70.24	62.9	56.6	51.31	96	98.69	94.75	97.17	88.54	poly(A) binding protein cytoplasmic 4
3915	LAMC1	NM_002293	54.76	70.23	62.29	71.78	40.03	32.71	33.28	33.08	33.49	34.63	laminin subunit gamma 1
1968	EIF2S3	NM_001415	77.47	70.21	59.67	68.13	55.03	81.16	86.63	79.4	89.7	78.57	eukaryotic translation initiation factor 2 subunit gamma
26099	SZRD1	NM_001114600,NM_001271869	57.55	70.15	67.29	72.02	67.92	89.11	92.26	90.26	96.25	93.83	SUZ RNA binding domain containing 1
9526	MPDU1	NM_001330073,NM_004870	46.74	70.14	61.57	75.65	55.85	64.62	72.96	84.61	87.73	86.66	mannose-P-dolichol utilization defect 1
23603	CORO1C	NM_001105237,NM_001276471,NM_014325	95.7	70.12	73.26	73.89	76.13	77.56	66.59	70.37	63.18	69.56	coronin 1C
51186	TCEAL9	NM_001006612,NM_001006613,NM_001006614,NM_016303	66.43	70.11	82.82	85.9	82.34	86.4	92.07	94.63	107.63	97.16	transcription elongation factor A like 9
51507	RTF2	NM_001283035,NM_001283036,NM_001283037,NM_016407	67.89	69.95	70.8	69.03	69.76	88.24	85.07	91.24	88.83	87.82	replication termination factor 2
1645	AKR1C1	NM_001353	16.13	69.94	66.99	81.78	131.69	71.44	8.19	72.4	15.01	109.58	aldo-keto reductase family 1 member C1
54499	TMCO1	NM_001256164,NM_001256165,NM_019026	87.83	69.93	80.18	76.13	92.21	32.09	31.67	32.39	31.46	32.75	transmembrane and coiled-coil domains 1
2098	ESD	NM_001984	60.44	69.89	64.73	75.33	56.22	74.65	75.2	80.13	87.48	82.58	esterase D
10269	ZMPSTE24	NM_005857	78.65	69.82	66.64	77.67	61.7	49.56	45.4	53.1	51.87	54.28	zinc metallopeptidase STE24
6713	SQLE	NM_003129	60.36	69.76	60.62	79.22	44.24	64.47	64.61	68.31	60.97	64.51	squalene epoxidase
54543	TOMM7	NM_019059	65.07	69.65	56.8	73.76	55.46	57.61	62.39	63.87	76.32	65.32	translocase of outer mitochondrial membrane 7
10949	HNRNPA0	NM_006805	80.71	69.53	71.51	67.37	67.02	51.45	52.68	47.82	50.03	42.43	heterogeneous nuclear ribonucleoprotein A0
3609	ILF3	NM_001137673,NM_004516,NM_012218,NM_017620,NM_153464	84.22	69.5	71.12	64.39	54.42	97.77	108.41	98.56	108.72	98.14	interleukin enhancer binding factor 3
1653	DDX1	NM_004939	70.48	69.48	64.51	76.26	51.4	50.9	52.87	54.69	60.48	57.67	DEAD-box helicase 1
5955	RCN2	NM_001271837,NM_002902	78.64	69.47	70.77	78.93	65.88	50.42	50.29	50.5	61.31	49.87	reticulocalbin 2
6396	SEC13	NM_001136026,NM_001136232,NM_001278946,NM_030673,NM_183352	65.87	69.46	63.52	73.9	54.54	53.2	50.96	54.71	61.8	58.35	SEC13 homolog, nuclear pore and COPII coat complex component
533	ATP6V0B	NM_001039457,NM_001294333,NM_004047	71.11	69.42	69.12	76.6	85.26	61.36	54.63	63.47	55.36	63.09	ATPase H+ transporting V0 subunit b
7040	TGFB1	NM_000660	68.6	69.38	63.34	70.02	75.94	79.72	68.78	70.77	70.32	68.79	transforming growth factor beta 1
8624	PSMG1	NM_001261824,NM_001320795,NM_003720,NM_203433	66.53	69.34	57.84	74.87	48.52	70.97	68.1	68.36	77.16	71.91	proteasome assembly chaperone 1
5962	RDX	NM_001260492,NM_001260493,NM_001260494,NM_001260495,NM_001260496,NM_002906	78.64	69.24	55.79	68.2	46.39	59.51	59.85	64.34	58.43	62.42	radixin
10540	DCTN2	NM_001261412,NM_001261413,NM_001348065,NM_001348066,NM_001348067,NM_001348068,NM_006400	60.38	69.13	66.64	71.04	64.54	150.06	143.95	158.29	144.51	161.91	dynactin subunit 2
2874	GPS2	NM_004489	51.93	69.09	60.75	68.13	54.11	46.57	53.9	59.64	62.29	64.53	G protein pathway suppressor 2
488	ATP2A2	NM_001681,NM_170665	94.57	69.09	75.65	60.22	70.48	48.45	43.04	44.17	38.6	44.87	ATPase sarcoplasmic/endoplasmic reticulum Ca2+ transporting 2
55854	ZC3H15	NM_018471	90.69	69.09	65.96	72.49	63.3	65.22	61.55	58.36	62.86	57.35	zinc finger CCCH-type containing 15
10212	DDX39A	NM_005804	89.42	69.05	62.59	60.92	49.88	82.52	59.51	64.43	48.86	59.96	DExD-box helicase 39A
9987	HNRNPDL	NM_001207000,NM_031372	70.63	69	58.91	58.94	43.31	74.05	50.63	50.64	26.54	44.25	heterogeneous nuclear ribonucleoprotein D like
116832	RPL39L	NM_052969	49.46	68.97	56.97	75.24	49.8	47.92	50.32	57.9	65.3	59.4	ribosomal protein L39 like
7374	UNG	NM_003362,NM_080911	69.07	68.9	52.91	83.35	41.67	44.64	59.43	44.24	63.77	45.51	uracil DNA glycosylase
900	CCNG1	NM_004060,NM_199246	59.61	68.88	68.81	80.19	58.41	169.65	187.13	173.76	189.53	174.8	cyclin G1
150678	COPS9	NM_001163424,NM_138336	54.24	68.87	63.62	66.62	48.71	38.75	41.26	40.49	55.73	43.21	COP9 signalosome subunit 9
10447	FAM3C	NM_001040020,NM_014888	86.81	68.84	96.06	76.27	93.49	99.05	95.49	84.02	79.37	87.4	family with sequence similarity 3 member C
7329	UBE2I	NM_003345,NM_194259,NM_194260,NM_194261	76.56	68.68	67.58	49.24	67.61	69.14	67.78	63.26	64.25	64.7	ubiquitin conjugating enzyme E2 I
8702	B4GALT4	NM_003778,NM_212543	75.7	68.56	59.58	74.3	41.4	48.03	38.45	42.74	35.07	42.32	beta-1,4-galactosyltransferase 4
3430	IFI35	NM_001330230,NM_005533	26.58	68.54	112.15	61.03	205.29	36.06	38.45	43.5	40.16	46.02	interferon induced protein 35
2017	CTTN	NM_001184740,NM_005231,NM_138565	65.98	68.53	62.85	67.06	79.79	124.95	118.37	122.12	115.25	116.33	cortactin
8829	NRP1	NM_001024628,NM_001024629,NM_001244972,NM_001244973,NM_001330068,NM_003873	72.76	68.47	108.5	61.37	116.85	25.87	20.83	19.94	16.66	18.8	neuropilin 1
163	AP2B1	NM_001030006,NM_001282	72.41	68.4	76.63	70.86	57.16	133.9	145.79	139.05	150.48	139.82	adaptor related protein complex 2 beta 1 subunit
4809	SNU13	NM_001003796,NM_005008	66.81	68.4	61.42	69.35	57.33	79.54	76.6	71.35	83.96	74.69	small nuclear ribonucleoprotein 13
822	CAPG	NM_001256139,NM_001256140,NM_001320732,NM_001320733,NM_001320734,NM_001747	44.57	68.29	71.69	75.24	79.1	45.94	35.46	53.73	43.65	57.71	capping actin protein, gelsolin like
7414	VCL	NM_003373,NM_014000	97.18	68.26	68.41	65.23	62.55	138.65	125.16	130.78	111.42	131.91	vinculin
4323	MMP14	NM_004995	52.99	68.2	83.15	61.45	87.5	11.07	12.64	10.91	12.1	11.09	matrix metallopeptidase 14
6240	RRM1	NM_001033,NM_001318064,NM_001318065,NM_001330193	61.77	68.16	54.05	76.52	36.52	80.49	91.48	93.61	98.64	92.24	ribonucleotide reductase catalytic subunit M1
23636	NUP62	NM_001193357,NM_012346,NM_016553,NM_153718,NM_153719	62.54	68.05	65.2	70.8	60.23	36.15	39.81	35.32	32.45	34.61	nucleoporin 62
89891	WDR34	NM_052844	47.9	67.82	53.61	72.04	38.58	92.19	104.93	108.87	111.88	114.31	WD repeat domain 34
7528	YY1	NM_003403	70.64	67.82	64.87	70.25	72.67	37.87	40.61	41.07	43.64	40.34	YY1 transcription factor
740	MRPL49	NM_004927	69.09	67.82	61.14	70.5	60.82	63.26	64.44	63.46	64.29	66.34	mitochondrial ribosomal protein L49
23420	NOMO1	NM_014287	58.02	67.74	71.14	71.16	77.51	37.73	32.93	40.27	35.71	43.65	NODAL modulator 1
4938	OAS1	NM_001032409,NM_001320151,NM_002534,NM_016816	18.15	67.64	104.96	65.65	214.13	11.96	9.61	11.18	9.21	9.57	2'-5'-oligoadenylate synthetase 1
6432	SRSF7	NM_001031684,NM_001195446	81.09	67.64	58.31	63.31	46.66	79.7	57.95	52.61	37.76	43.79	serine and arginine rich splicing factor 7
5411	PNN	NM_002687	79.22	67.62	54.65	75.13	43.18	51.08	53.89	46.09	57.69	47.77	pinin, desmosome associated protein
2907	GRINA	NM_000837,NM_001009184	52.25	67.62	73.9	72.84	107.53	122.76	114.82	109.23	115.7	116.18	glutamate ionotropic receptor NMDA type subunit associated protein 1
10801	2022-09-09	NM_001113491,NM_001113492,NM_001113493,NM_001113494,NM_001113495,NM_001113496,NM_001293695,NM_001293696,NM_001293697,NM_001293698,NM_006640	75.89	67.6	72.86	48.41	69.99	128.81	116.25	103.08	92.13	104.42	septin 9
10542	LAMTOR5	NM_006402	75.01	67.54	70.45	75.86	69.16	82.44	81.17	85.3	92.63	83.52	late endosomal/lysosomal adaptor, MAPK and MTOR activator 5
374	AREG	NM_001657	89.24	67.54	26.1	71.74	38.02	73.51	62.22	84.05	50.4	81.49	amphiregulin
51398	WDR83OS	NM_016145	56.51	67.42	62.29	68.86	71.49	82.62	78.78	80.7	90.01	77.85	WD repeat domain 83 opposite strand
79586	CHPF	NM_001195731,NM_024536	40.52	67.21	112.82	69.49	138.51	37.54	20.56	33.35	23.46	35.53	chondroitin polymerizing factor
7884	SLBP	NM_001306074,NM_001306075,NM_006527	70.37	67.2	53.59	79.16	47.98	69.8	69.62	68.9	72.27	72.28	stem-loop binding protein
51382	ATP6V1D	NM_015994	70.17	67.2	76.57	77.74	83.53	50.68	44.26	55.86	51.19	60.85	ATPase H+ transporting V1 subunit D
116540	MRPL53	NM_053050	60.74	67.18	59.96	71.43	57.06	61.54	55.41	64.93	64.23	64.87	mitochondrial ribosomal protein L53
7319	UBE2A	NM_001282161,NM_003336,NM_181762	63.97	67.17	74.76	83.1	90.4	95.49	95.73	115.04	116.61	123.71	ubiquitin conjugating enzyme E2 A
1487	CTBP1	NM_001012614,NM_001328	56.92	67.14	64.63	43.02	65.29	86.2	79.52	74.91	65.92	75.06	C-terminal binding protein 1
26020	LRP10	NM_001329226,NM_014045	47.88	67.14	70.82	62.76	81.2	31.49	29.39	31.41	28.43	32.92	LDL receptor related protein 10
30851	TAX1BP3	NM_001204698,NM_014604	55.76	67.05	69.03	73.06	69.55	81.6	102.57	89.72	137.86	102.47	Tax1 binding protein 3
25941	TPGS2	NM_001271949,NM_001271950,NM_001271951,NM_001271952,NM_001271953,NM_001271954,NM_001271955,NM_001271956,NM_001330572,NM_015476	54.21	66.96	61.67	69.02	50.96	30.85	31.73	34.29	33.44	32.55	tubulin polyglutamylase complex subunit 2
122704	MRPL52	NM_001318870,NM_178336,NM_180982,NM_181304,NM_181305,NM_181306,NM_181307	61.19	66.87	49.28	65.04	45.42	28.93	34.23	34.12	39.42	30.87	mitochondrial ribosomal protein L52
10211	FLOT1	NM_001318875,NM_005803	52.45	66.84	57.63	96.96	69.88	64.02	68.33	76.09	74.07	76.58	flotillin 1
3149	HMGB3	NM_001301228,NM_001301229,NM_001301231,NM_005342	72.31	66.79	78.21	69.4	59.03	32.03	31.46	30.38	33.53	28.95	high mobility group box 3
8933	RTL8C	NM_001078171	47.01	66.68	85.8	61.83	90.65	71.68	50.81	63.97	59.04	74.15	retrotransposon Gag like 8C
60488	MRPS35	NM_001190864,NM_021821	66	66.66	65.23	76.65	60.54	85.55	89.38	93.18	98.06	97.05	mitochondrial ribosomal protein S35
23560	GTPBP4	NM_012341	105.1	66.62	60.93	66.48	48.53	58.82	46.06	49.24	44.91	47.95	GTP binding protein 4
4358	MPV17	NM_002437	53.78	66.51	55.46	69.98	54.36	65.1	61.22	64.04	67.78	59.06	MPV17, mitochondrial inner membrane protein
2790	GNG10	NM_001017998,NM_001198664	69.21	66.34	58.1	77.76	47.93	64.25	69.28	74.22	82.83	77.31	G protein subunit gamma 10
4501	MT1X	NM_005952	60.45	66.25	82.63	81.96	87.78	115.34	138.01	141.6	130.27	150.95	metallothionein 1X
55611	OTUB1	NM_017670	53.4	66.16	57.62	67.28	60.14	62.01	61.31	66.89	59.4	66.22	OTU deubiquitinase, ubiquitin aldehyde binding 1
54663	WDR74	NM_001307977,NM_018093	65.71	66.16	59.23	62.7	61.89	36.46	36.38	35.78	34.46	36.37	WD repeat domain 74
51335	NGRN	NM_001033088	62.6	66.12	91.46	64.32	102.81	62.58	61.63	69.33	62.83	69.85	neugrin, neurite outgrowth associated
9167	COX7A2L	NM_001319036,NM_001319037,NM_001319038,NM_001319040,NM_004718	69.67	65.97	62.72	70.67	66.29	60.49	61.49	62.93	69.22	59	cytochrome c oxidase subunit 7A2 like
9276	COPB2	NM_004766	60.39	65.94	69.68	70.37	65.97	76.18	82.7	84.25	88.08	81.67	coatomer protein complex subunit beta 2
26355	FAM162A	NM_014367	61.11	65.94	54.13	81.72	45.2	61.78	62.73	63.51	77.33	68.58	family with sequence similarity 162 member A
84293	FAM213A	NM_001243778,NM_001243779,NM_001243780,NM_001243781,NM_001243782,NM_032333	46.2	65.9	64.56	70.51	56.87	49.86	49.17	55.46	57.87	55.07	family with sequence similarity 213 member A
11345	GABARAPL2	NM_007285	58.67	65.87	74.55	79.13	78.48	61.16	63.29	65.47	67.72	61.24	GABA type A receptor associated protein like 2
4070	TACSTD2	NM_002353	89.18	65.83	55.05	73.1	54.9	35.76	50.11	38.27	60.4	32.7	tumor associated calcium signal transducer 2
51324	SPG21	NM_001127889,NM_001127890,NM_016630	59.42	65.82	67.74	69.52	71.73	69.21	74.92	70.23	78.37	69.81	SPG21, maspardin
8804	CREG1	NM_003851	72.08	65.78	77.59	74.65	76.5	33.25	34.55	33.29	41.24	31.93	cellular repressor of E1A stimulated genes 1
79026	AHNAK	NM_001346445,NM_001346446,NM_001620,NM_024060	89.57	65.56	64.41	60.04	44.33	45.76	46.72	49.31	42.25	52.3	AHNAK nucleoprotein
6563	SLC14A1	NM_001128588,NM_001146036,NM_001146037,NM_001308278,NM_001308279,NM_015865	54.37	65.53	99.4	66.33	110.75	0.21	0.27	0.41	0.22	0.27	solute carrier family 14 member 1 (Kidd blood group)
9324	HMGN3	NM_001201362,NM_001201363,NM_001318884,NM_001318885,NM_001318886,NM_001318887,NM_001318888,NM_004242,NM_138730	64.1	65.45	62.43	76.86	48.26	50.98	49.83	59.54	59.99	58.83	high mobility group nucleosomal binding domain 3
54888	NSUN2	NM_001193455,NM_017755	83.19	65.4	54.25	63.05	42.82	41.6	39.6	37.83	39.49	37.58	NOP2/Sun RNA methyltransferase family member 2
347734	SLC35B2	NM_001286509,NM_001286510,NM_001286511,NM_001286512,NM_001286513,NM_001286517,NM_001286519,NM_001286520,NM_178148	53.76	65.35	65.68	74.81	65.62	51.88	49.65	54.94	55.95	60.58	solute carrier family 35 member B2
23367	LARP1	NM_015315	76.71	65.31	64.06	56.83	59.79	68.56	58.5	55.61	44.29	54.06	La ribonucleoprotein domain family member 1
10099	TSPAN3	NM_001168412,NM_005724,NM_198902	64.55	65.29	73.53	70.46	75.53	72.76	67.41	70.59	76.36	71.32	tetraspanin 3
9584	RBM39	NM_001242599,NM_001242600,NM_001323422,NM_001323423,NM_001323424,NM_004902,NM_184234	72.76	65.23	62.66	62.11	69.32	94.14	80.51	71.68	67.25	66.98	RNA binding motif protein 39
1052	CEBPD	NM_005195	31.92	65.16	65.03	62.43	88.47	20.18	24.62	23.36	23.14	23.9	CCAAT/enhancer binding protein delta
39	ACAT2	NM_001303253,NM_005891	43.15	65.15	42.53	79.55	28.19	71.83	80.3	89.99	92.03	83.5	acetyl-CoA acetyltransferase 2
537	ATP6AP1	NM_001183	60.75	65.02	77.72	68.12	103.25	79.26	62.26	74.6	67.11	74.62	ATPase H+ transporting accessory protein 1
3661	IRF3	NM_001197122,NM_001197123,NM_001197124,NM_001197125,NM_001197126,NM_001197127,NM_001197128,NM_001571	52.36	65.01	60.2	65.65	65.27	35.83	43.3	40.42	35.85	39.14	interferon regulatory factor 3
4233	MET	NM_000245,NM_001127500,NM_001324401,NM_001324402	73.03	64.97	71.43	63.17	63.25	94.85	92.39	85.78	75.55	88.55	MET proto-oncogene, receptor tyrosine kinase
8073	PTP4A2	NM_001195100,NM_001195101,NM_080391	74.33	64.97	73.88	66.22	72.79	93.74	96.58	92.54	95.73	93.76	protein tyrosine phosphatase type IVA, member 2
64983	MRPL32	NM_031903	63.77	64.95	65.85	79.85	62.45	57.95	71.02	67.63	91.28	71.18	mitochondrial ribosomal protein L32
3303	HSPA1A	NM_005345	80.16	64.87	92.15	58.97	98.46	105.9	197.01	179.94	225.45	179.59	heat shock protein family A (Hsp70) member 1A
29089	UBE2T	NM_001310326,NM_014176	52.62	64.84	49.86	75.33	43.76	58.86	56.96	68.71	56.91	70.97	ubiquitin conjugating enzyme E2 T
6780	STAU1	NM_001037328,NM_001319134,NM_001319135,NM_001322927,NM_001322928,NM_001322929,NM_001322930,NM_001322931,NM_001322932,NM_001322933,NM_004602,NM_017452,NM_017453,NM_017454	72.33	64.71	71.14	64.61	74.77	125.04	124.91	117.71	113.64	125.13	staufen double-stranded RNA binding protein 1
6734	SRPRA	NM_001177842,NM_003139	65.5	64.63	73.76	63.77	76.94	91.34	92.26	94.3	95.81	96.97	SRP receptor alpha subunit
4900	NRGN	NM_001126181,NM_006176	40.34	64.58	74.15	71.53	61.39	40.31	54.89	46.76	56.09	46.62	neurogranin
22985	ACIN1	NM_001164814,NM_001164815,NM_001164816,NM_001164817,NM_014977	73.98	64.57	62.64	63.53	70.6	58.46	58.91	53.83	53.62	54.33	apoptotic chromatin condensation inducer 1
88745	RRP36	NM_001329704,NM_033112	70.77	64.51	66.86	69.91	53.89	63.54	57.21	59.58	53.05	56.52	ribosomal RNA processing 36
23557	SNAPIN	NM_012437	47.9	64.38	56.51	61.53	51.32	41.65	41.89	38.6	33.21	39.52	SNAP associated protein
6385	SDC4	NM_002999	56.38	64.32	71.87	82.78	116.27	45.4	42.53	40.97	53.19	47.37	syndecan 4
5605	MAP2K2	NM_030662	60.03	64.29	52.93	56.36	59.67	80.09	74.71	82.55	71.03	74.58	mitogen-activated protein kinase kinase 2
1654	DDX3X	NM_001193416,NM_001193417,NM_001356	94.54	64.24	66.51	60.37	59	97.81	81.24	88.41	73.4	86.66	DEAD-box helicase 3, X-linked
11313	LYPLA2	NM_007260	57.72	64.15	67.83	61.76	74.69	39.27	40.93	42.5	38.65	44.89	lysophospholipase II
9319	TRIP13	NM_001166260,NM_004237	62.66	64.14	49.91	62.55	35.57	43.17	39.96	39.25	36.78	39.88	thyroid hormone receptor interactor 13
55723	ASF1B	NM_018154	43	64.13	45.5	79.71	35.06	70.6	93.34	80.17	110.22	84.65	anti-silencing function 1B histone chaperone
7334	UBE2N	NM_003348	77.5	64.11	61.12	70.52	48.19	56.77	58.11	53.56	62.17	53.15	ubiquitin conjugating enzyme E2 N
83460	EMC6	NM_001014764,NM_031298	61.32	63.95	51.95	56.64	53.27	70.76	55.54	62.61	56.03	65.17	ER membrane protein complex subunit 6
51187	RSL24D1	NM_016304	85.07	63.94	64.73	60.32	64.05	57.9	59.91	51.37	60.15	50.67	ribosomal L24 domain containing 1
1104	RCC1	NM_001048194,NM_001048195,NM_001048199,NM_001269	71.69	63.91	46.54	61.14	28.86	32.22	38.42	28.83	29.32	27.12	regulator of chromosome condensation 1
51596	CUTA	NM_001014433,NM_001014837,NM_001014838,NM_001014840,NM_015921	45.97	63.89	65.39	71.84	71.57	94.4	111	108.25	105.45	107.12	cutA divalent cation tolerance homolog
9130	FAM50A	NM_004699	61.65	63.89	70.1	60.79	70.28	58.02	48.22	55.77	47.5	58.8	family with sequence similarity 50 member A
8724	SNX3	NM_001300928,NM_001300929,NM_003795,NM_152827	62.58	63.84	59.6	70.72	57.66	139.21	144.34	153.51	154.89	150.75	sorting nexin 3
645	BLVRB	NM_000713	54.63	63.84	59.23	75.97	74.74	66.36	52.78	69.85	64.38	65.13	biliverdin reductase B
10434	LYPLA1	NM_001279356,NM_001279357,NM_001279358,NM_001279359,NM_001279360,NM_006330	78.57	63.8	69.61	65.83	66.57	79.7	74.35	76.89	76.05	82.36	lysophospholipase I
54469	ZFAND6	NM_001242911,NM_001242912,NM_001242913,NM_001242914,NM_001242915,NM_001242916,NM_001242917,NM_001242918,NM_001242919,NM_019006	58.43	63.75	70.57	68.61	73.24	49	48.92	47.95	46.15	48.21	zinc finger AN1-type containing 6
55959	SULF2	NM_001161841,NM_018837,NM_198596	39.66	63.66	75.01	56.35	71.58	154.65	126.61	160.82	125.64	153.38	sulfatase 2
83982	IFI27L2	NM_032036	35.12	63.59	77.94	71.56	95.53	60.23	51.38	66.49	60.25	76.42	interferon alpha inducible protein 27 like 2
57129	MRPL47	NM_020409,NM_177988	67.45	63.55	59.7	63.17	49.16	61.9	58.08	55.47	58.08	52.75	mitochondrial ribosomal protein L47
6772	STAT1	NM_007315,NM_139266	31.93	63.55	118.41	58.91	222.47	26.49	24.09	31.03	24.6	32.04	signal transducer and activator of transcription 1
113130	CDCA5	NM_080668	66.57	63.52	60.13	70.36	47.23	53.51	52.27	53.97	61.06	56.15	cell division cycle associated 5
1639	DCTN1	NM_001135040,NM_001135041,NM_001190836,NM_001190837,NM_004082,NM_023019	58.27	63.43	56.29	65.25	52.53	42.7	42.9	44.45	45.09	44	dynactin subunit 1
56945	MRPS22	NM_020191	63.32	63.38	55.12	66.53	48.05	62.25	68.32	66.29	65.55	67.57	mitochondrial ribosomal protein S22
84191	FAM96A	NM_001014812,NM_001289108,NM_032231	52.67	63.33	56.55	72.27	58.46	73.56	72.49	78.56	80.54	80.46	family with sequence similarity 96 member A
1727	CYB5R3	NM_000398,NM_001129819,NM_001171660,NM_001171661,NM_007326	51.66	63.33	59.37	62.63	64.61	82.11	77.93	85.63	78.7	89.16	cytochrome b5 reductase 3
8301	PICALM	NM_001008660,NM_001206946,NM_001206947,NM_007166	66.89	63.2	82.6	61.28	90.39	167.78	134.51	156.39	121.78	162.11	phosphatidylinositol binding clathrin assembly protein
56650	CLDND1	NM_001040181,NM_001040182,NM_001040183,NM_001040199,NM_001040200,NM_019895	44.8	63.19	78.36	67.54	94.5	15.92	17.77	17.06	17.85	20.42	claudin domain containing 1
6526	SLC5A3	NM_006933	15.56	63.15	53.21	66.5	53	5.99	10.97	13.04	16.51	11.99	solute carrier family 5 member 3
84916	UTP4	NM_001318391,NM_032830	73.99	63.13	57.42	65.17	53.51	72.13	64.26	64.58	63.43	67.22	UTP4, small subunit processome component
873	CBR1	NM_001286789,NM_001757	51.8	63.11	51.66	67.12	55.21	98.59	93.72	107.21	96.15	104.01	carbonyl reductase 1
1277	COL1A1	NM_000088	44.74	63.05	94.8	60.09	56.33	0.24	0.48	0.28	0.2	0.3	collagen type I alpha 1 chain
8836	GGH	NM_003878	48.9	63.02	62.58	71.69	60.89	34.53	34.37	50.08	45.78	50.85	gamma-glutamyl hydrolase
5861	RAB1A	NM_004161,NM_015543	66.93	62.94	64.47	62.87	61.89	70.92	66.26	68.09	67.6	67.4	RAB1A, member RAS oncogene family
51053	GMNN	NM_001251989,NM_001251990,NM_001251991,NM_015895	68.22	62.83	55.18	64.01	42.32	80.05	81.54	78.85	77.25	80.08	geminin, DNA replication inhibitor
79897	RPP21	NM_001199120,NM_001199121,NM_024839	41.99	62.82	50.94	70.14	48.03	51.2	53.5	60.29	70.94	65.55	ribonuclease P/MRP subunit p21
6836	SURF4	NM_001280788,NM_001280789,NM_001280790,NM_001280791,NM_001280792,NM_001280793,NM_033161	70.34	62.7	66.48	65.99	65.76	98.35	107.44	101.75	113.27	100.45	surfeit 4
122961	ISCA2	NM_001272007,NM_194279	54.42	62.6	57.11	59	52.19	22.32	24.34	23.59	20.83	21.78	iron-sulfur cluster assembly 2
7916	PRRC2A	NM_004638,NM_080686	54.99	62.58	59.8	57.44	62.65	75.83	77.53	80.69	64.61	83.1	proline rich coiled-coil 2A
8673	VAMP8	NM_003761	50.79	62.57	68.37	71.06	69.61	66.53	63.47	63.89	71.79	64.28	vesicle associated membrane protein 8
84324	SARNP	NM_033082	58.47	62.55	61.96	68.38	53.93	139.58	140.52	138.26	151.84	143.09	SAP domain containing ribonucleoprotein
57552	NCEH1	NM_001146276,NM_001146277,NM_001146278,NM_020792	71.71	62.5	58.31	69.58	52.01	52.82	39.08	47.57	42.33	48.87	neutral cholesterol ester hydrolase 1
6237	RRAS	NM_006270	45.15	62.46	75.35	63	106.16	47.48	51.02	52.96	54.17	59.67	RAS related
10509	SEMA4B	NM_001324029,NM_001324030,NM_001324031,NM_001324032,NM_001324033,NM_001324034,NM_020210,NM_198925	42.69	62.4	71.05	54.78	80.76	45.08	35.94	39.89	27.09	38.27	semaphorin 4B
439	ASNA1	NM_004317	48.96	62.4	58.44	64.53	57.05	67.58	66.54	72.45	71.67	73.25	arsA arsenite transporter, ATP-binding, homolog 1 (bacterial)
30001	ERO1A	NM_014584	70.92	62.21	68.09	68.26	62.45	18.78	19.07	17.98	20.27	19.34	endoplasmic reticulum oxidoreductase 1 alpha
10189	ALYREF	NM_005782	76.78	62.16	46.46	54.16	37.37	175.95	181.1	171.13	128.89	122.58	Aly/REF export factor
153830	RNF145	NM_001199380,NM_001199381,NM_001199382,NM_001199383,NM_144726	69.53	62.12	61.79	68.87	46.14	19.2	19.51	19.25	17	18.88	ring finger protein 145
6790	AURKA	NM_001323303,NM_001323304,NM_001323305,NM_003600,NM_198433,NM_198434,NM_198435,NM_198436,NM_198437	79.44	62.11	64	57.62	38.79	118.86	105.42	115.21	75.21	98.99	aurora kinase A
26003	GORASP2	NM_001201428,NM_015530	63.31	62.1	62.13	64.02	64.74	51.6	47.99	47.17	44.83	46.23	golgi reassembly stacking protein 2
142	PARP1	NM_001618	60.2	62.04	54.8	66.4	39.59	76.73	88.97	84.12	96.27	86.86	poly(ADP-ribose) polymerase 1
4828	NMB	NM_021077,NM_205858	37.21	61.89	60.97	68.8	65.5	20.47	20.08	27.11	21.97	28.64	neuromedin B
10970	CKAP4	NM_006825	44.94	61.7	68.88	61.22	85.84	42.99	40.75	42.36	43.95	41.21	cytoskeleton associated protein 4
8263	F8A1	NM_012151	46.86	61.59	73.29	72.39	77.69	60.75	62.27	70.95	74.33	77.55	coagulation factor VIII associated 1
4898	NRDC	NM_001101662,NM_001242361,NM_002525	63.73	61.56	59	63.42	54.11	64.94	66.49	67.01	73.16	64.69	nardilysin convertase
8570	KHSRP	NM_003685	72.73	61.54	51.75	61.18	41.16	82.58	92.2	79.44	86.01	80.46	KH-type splicing regulatory protein
57407	NMRAL1	NM_001305141,NM_001305142,NM_001351994,NM_001351995,NM_001351996,NM_020677	44.27	61.5	50.2	57.94	42.65	52.1	59.41	51.73	58.14	51.39	NmrA like redox sensor 1
8031	NCOA4	NM_001145260,NM_001145261,NM_001145262,NM_001145263,NM_005437	59.87	61.33	70.69	69.16	78.81	50.93	52.37	49.91	59.13	52.97	nuclear receptor coactivator 4
81688	C6orf62	NM_030939	62.12	61.15	85.02	59.27	110.68	72.89	69.11	68.18	63.49	67.65	chromosome 6 open reading frame 62
280636	SELENOH	NM_001321335,NM_170746	49.14	61.14	45.47	61.26	35.75	59.19	67.39	59.7	73.32	51.99	selenoprotein H
7411	VBP1	NM_001303543,NM_001303544,NM_001303545,NM_003372	64.39	61.09	55.98	67.72	48.17	79.61	83.41	87.06	93.68	84.81	VHL binding protein 1
9448	MAP4K4	NM_001242559,NM_001242560,NM_004834,NM_145686,NM_145687	70.5	61.09	73.31	51.06	67.27	24.95	23.16	21.11	20.42	21.18	mitogen-activated protein kinase kinase kinase kinase 4
10549	PRDX4	NM_006406	53.58	61.04	54.2	70.8	61.29	87.22	106.34	109.78	128.35	114.37	peroxiredoxin 4
5546	PRCC	NM_005973	67.08	60.94	61.61	55.43	62.88	55.05	46.29	41.89	30.91	41.27	papillary renal cell carcinoma (translocation-associated)
9789	SPCS2	NM_014752	65.24	60.9	65.77	67.55	65.59	74.33	75.85	78.65	86.26	76.68	signal peptidase complex subunit 2
23028	KDM1A	NM_001009999,NM_015013	69.31	60.88	59.3	63.05	45.89	24.91	26.13	24.59	25.48	25.81	lysine demethylase 1A
81552	VOPP1	NM_001284282,NM_001284283,NM_001284284,NM_001321242,NM_001321243,NM_001321244,NM_001321246,NM_001321247,NM_001321248,NM_001321249,NM_001321250,NM_001321251,NM_030796	67.3	60.85	69.08	62.3	63.45	63.87	57.72	64.89	54.81	64.43	VOPP1, WBP1/VOPP1 family member
1314	COPA	NM_001098398,NM_004371	57.26	60.81	72.95	63.43	78.6	43.45	46.3	50.13	45.62	54.73	coatomer protein complex subunit alpha
51727	CMPK1	NM_001136140,NM_016308	59.55	60.8	69	63.08	70.15	70.27	71.42	78.27	83.26	78.33	cytidine/uridine monophosphate kinase 1
6711	SPTBN1	NM_003128,NM_178313	68.07	60.7	71.23	53.28	73.38	57.68	41.98	50.78	35.63	50.74	spectrin beta, non-erythrocytic 1
309	ANXA6	NM_001155,NM_001193544	45.41	60.7	68.18	61.61	65.43	39.83	46.76	45.1	49.41	42.15	annexin A6
1295	COL8A1	NM_001850,NM_020351	51.69	60.58	65.91	53.61	30.65	0	0	0.05	0	0.07	collagen type VIII alpha 1 chain
10609	P3H4	NM_006455	46.01	60.46	54.48	63.75	52.89	14.06	13.81	14.59	14.96	15.09	prolyl 3-hydroxylase family member 4 (non-enzymatic)
1191	CLU	NM_001831	34.46	60.42	73.23	60.84	125.26	104.34	67.85	94.92	76.61	101.98	clusterin
10553	HTATIP2	NM_001098520,NM_001098521,NM_001098522,NM_001098523,NM_006410	50.64	60.39	48.31	66.44	52.4	93.23	99.56	108.18	106.07	99.68	HIV-1 Tat interactive protein 2
51367	POP5	NM_015918,NM_198202	47.17	60.32	45.17	75.18	35.61	21.72	24.94	26.04	30.37	27.47	POP5 homolog, ribonuclease P/MRP subunit
1174	AP1S1	NM_001283	49.73	60.29	53.81	67.9	54	111.42	119.05	116.41	122.51	117.47	adaptor related protein complex 1 sigma 1 subunit
53635	PTOV1	NM_001305105,NM_001305108,NM_017432	48.14	60.24	62.69	47.39	58.89	81.38	81.52	73.55	83.03	71.65	prostate tumor overexpressed 1
10548	TM9SF1	NM_001014842,NM_001289006,NM_006405	47.06	60.15	63.92	65.52	67.67	26.97	28.33	26.5	26.73	28.89	transmembrane 9 superfamily member 1
9908	G3BP2	NM_012297,NM_203504,NM_203505	69.26	60.15	57.76	61.88	53.44	61.78	56.64	62.37	58.19	60.85	G3BP stress granule assembly factor 2
7922	SLC39A7	NM_001077516,NM_001288777,NM_006979	51.07	60.08	63.96	66.02	62.21	66.04	68.29	71.09	73.25	70.48	solute carrier family 39 member 7
221092	HNRNPUL2	NM_001079559	61.88	60.07	58.16	65.65	50.21	35.11	37.51	42.15	38.07	44.38	heterogeneous nuclear ribonucleoprotein U like 2
10953	TOMM34	NM_006809	60.99	59.96	63.12	65.21	63.72	82.86	79.79	83.26	91.5	91.43	translocase of outer mitochondrial membrane 34
9351	SLC9A3R2	NM_001130012,NM_001252073,NM_001252075,NM_001252076,NM_004785	68.35	59.92	68.2	48.23	80.19	191.59	175.94	193.28	138.21	187.38	SLC9A3 regulator 2
2618	GART	NM_000819,NM_001136005,NM_001136006,NM_175085	69.25	59.91	53.04	60.57	45.61	47.42	50.73	48.39	52.31	50.62	phosphoribosylglycinamide formyltransferase, phosphoribosylglycinamide synthetase, phosphoribosylaminoimidazole synthetase
5439	POLR2J	NM_006234	53.12	59.85	50.15	58.56	41.1	78.14	76.84	84.38	89.99	79.49	RNA polymerase II subunit J
283820	NOMO2	NM_001004060,NM_173614	49.54	59.85	60.77	61.18	68.17	73.37	59.85	79.51	67.6	79.8	NODAL modulator 2
51278	IER5	NM_016545	38.57	59.82	53.98	65.58	65.71	16.75	19.01	25.14	24.85	29.21	immediate early response 5
1894	ECT2	NM_001258315,NM_001258316,NM_001349094,NM_001349095,NM_001349096,NM_001349097,NM_001349098,NM_001349099,NM_001349100,NM_001349101,NM_001349102,NM_001349103,NM_001349104,NM_018098	72.82	59.76	62.27	54.52	47.22	47.48	41.17	46.48	30.27	44.55	epithelial cell transforming 2
1729	DIAPH1	NM_001079812,NM_001314007,NM_005219	66.99	59.74	44.03	59.47	37.59	39.63	42.3	44.01	40.43	45.62	diaphanous related formin 1
64423	INF2	NM_001031714,NM_022489,NM_032714	59.59	59.65	52.4	39.8	50.69	50.22	51.91	46.71	46.87	45.25	inverted formin, FH2 and WH2 domain containing
51690	LSM7	NM_016199	59.07	59.64	56.2	62.32	47.03	60.58	66.12	65.44	72.72	64.64	LSM7 homolog, U6 small nuclear RNA and mRNA degradation associated
25844	YIPF3	NM_015388	50.8	59.63	69.44	57.84	81.85	44.69	43.94	44.95	43.68	47.11	Yip1 domain family member 3
56910	STARD7	NM_020151	59.13	59.6	57.06	63.04	50.29	53.99	51.65	51.02	48.85	50.96	StAR related lipid transfer domain containing 7
4218	RAB8A	NM_005370	60.06	59.58	62.09	59.79	58.77	68.14	68.65	62.77	58.21	62.18	RAB8A, member RAS oncogene family
8669	EIF3J	NM_001284335,NM_001284336,NM_003758	84.61	59.51	53.24	63.25	48.73	80.53	76.17	71.41	78.58	66.99	eukaryotic translation initiation factor 3 subunit J
7422	VEGFA	NM_001025366,NM_001025367,NM_001025368,NM_001025369,NM_001025370,NM_001033756,NM_001171622,NM_001171623,NM_001171624,NM_001171625,NM_001171626,NM_001171627,NM_001171628,NM_001171629,NM_001171630,NM_001204384,NM_001204385,NM_001287044,NM_001317010,NM_003376	41.16	59.49	54.18	59.01	93.33	12.31	9.38	15.76	10.08	17.46	vascular endothelial growth factor A
3423	IDS	NM_000202,NM_001166550,NM_006123	64.27	59.45	67.74	55.47	71.33	26.98	27.56	28.69	26.83	32.06	iduronate 2-sulfatase
10730	YME1L1	NM_001253866,NM_014263,NM_139312	70.09	59.44	59.55	54.82	58.98	58.96	55.24	59.3	55.53	57.98	YME1 like 1 ATPase
285855	RPL7L1	NM_198486	60.52	59.43	53.16	56.66	51.11	45.42	44.09	44.9	45.16	46.33	ribosomal protein L7 like 1
5696	PSMB8	NM_004159,NM_148919	45.61	59.33	96.57	62.5	109.17	73.31	72.56	82.78	69.03	85.07	proteasome subunit beta 8
26147	PHF19	NM_001009936,NM_001286840,NM_001286842,NM_001286843,NM_015651	52.42	59.32	55.02	55.1	46.37	86.11	76.84	82.52	70.03	88.06	PHD finger protein 19
4055	LTBR	NM_001270987,NM_002342	65.06	59.32	66.73	58.35	79.5	139.36	117.83	115.44	113.94	109.99	lymphotoxin beta receptor
9055	PRC1	NM_001267580,NM_003981,NM_199413	74.01	59.12	60.7	58.82	35.98	88.55	81.98	87.93	72.09	83.22	protein regulator of cytokinesis 1
1213	CLTC	NM_001288653,NM_004859	59.4	59.11	58.14	58.24	52.2	97.77	91.18	94.01	88	91.11	clathrin heavy chain
8802	SUCLG1	NM_003849	59.03	59.11	55.5	62.64	48.98	57.94	53.03	60.15	63.65	58.4	succinate-CoA ligase alpha subunit
57179	KIAA1191	NM_001079684,NM_001079685,NM_001287335,NM_001287336,NM_020444	48.84	59.11	55.16	60.61	61.5	45.17	44.9	51.42	48.65	53.13	KIAA1191
1069	CETN2	NM_004344	50.57	58.97	58.55	69.61	58.96	61.5	64.55	63.35	86.11	70.07	centrin 2
64422	ATG3	NM_001278712,NM_022488	59.04	58.94	54.4	59.97	51.79	78.61	76.56	76.07	69.69	76.65	autophagy related 3
115416	MALSU1	NM_138446	52.9	58.92	49.84	59.76	48.77	62.85	56.91	54.51	62.37	57.39	mitochondrial assembly of ribosomal large subunit 1
55920	RCC2	NM_001136204,NM_018715	62.45	58.74	63.12	57.04	57.45	33.19	33.73	28.19	28.95	29.5	regulator of chromosome condensation 2
26121	PRPF31	NM_015629	56.98	58.73	50.79	56.75	41.71	26.97	27.62	27.07	29.08	26.09	pre-mRNA processing factor 31
112495	GTF3C6	NM_138408	51.99	58.68	50.06	63.19	47.94	86.96	81.27	100.27	104.26	100.07	general transcription factor IIIC subunit 6
27249	MMADHC	NM_015702	62.54	58.66	57.45	55.06	51.05	66.92	68.4	66.77	69.75	68.22	methylmalonic aciduria and homocystinuria, cblD type
55165	CEP55	NM_001127182,NM_018131	69.49	58.65	59.69	71.77	41.48	71.25	70.4	88.41	74.83	85.99	centrosomal protein 55
4860	PNP	NM_000270	60.35	58.65	53.93	63.83	53.47	50.69	43.93	48.41	57.06	49.75	purine nucleoside phosphorylase
9804	TOMM20	NM_014765	68.05	58.64	49.79	57.63	42.14	92.68	86.83	81.91	95.64	87.69	translocase of outer mitochondrial membrane 20
4331	MNAT1	NM_001177963,NM_002431	66.27	58.63	56.51	58.79	48.99	21.58	20.75	17.81	14.73	16.31	MNAT1, CDK activating kinase assembly factor
26017	FAM32A	NM_014077	55.56	58.6	62.54	63.91	63.32	52.14	51.57	47.25	48	48.68	family with sequence similarity 32 member A
10465	PPIH	NM_001330510,NM_006347	72.06	58.54	59.93	60.14	42.44	68.17	72.57	70.35	84.53	63.08	peptidylprolyl isomerase H
51602	NOP58	NM_015934	88.93	58.52	65.82	63.34	57.65	58.96	54.43	49.67	52.96	47.86	NOP58 ribonucleoprotein
80755	AARSD1	NM_001261434	54.67	58.43	47.54	53.46	36.92	19.05	17.82	19.99	19.63	19.77	alanyl-tRNA synthetase domain containing 1
51070	NOSIP	NM_001270960,NM_015953	50.82	58.39	61.87	55.36	64.4	32.4	31.99	34.58	31.71	34.16	nitric oxide synthase interacting protein
7247	TSN	NM_001261401,NM_004622	55.6	58.34	55.83	61.54	43.54	30.79	31.14	29.85	33.61	29.01	translin
29088	MRPL15	NM_014175	51.86	58.33	60.87	55.11	53.08	51.92	50.99	48.59	51.22	48.52	mitochondrial ribosomal protein L15
4701	NDUFA7	NM_005001	44.72	58.33	46.85	55.61	41.29	66.51	65.28	79.85	74.99	84.65	NADH:ubiquinone oxidoreductase subunit A7
8812	CCNK	NM_001099402	57.54	58.32	49.1	55.83	56.15	39.12	36.73	38.34	34.95	36.79	cyclin K
9775	EIF4A3	NM_014740	69.75	58.32	56.83	59.41	52.37	48.48	50.22	51.87	62.34	55.36	eukaryotic translation initiation factor 4A3
7322	UBE2D2	NM_003339,NM_181838	65.35	58.31	56.19	54.46	62.53	46.9	40.74	39.33	35.03	41.42	ubiquitin conjugating enzyme E2 D2
64981	MRPL34	NM_023937	41.65	58.3	55.4	57.08	54.85	38.55	35.51	39.13	32.36	34.24	mitochondrial ribosomal protein L34
116092	DNTTIP1	NM_052951	51.08	58.23	62.48	62.13	69.78	50.85	44.46	41.12	34.53	43.18	deoxynucleotidyltransferase terminal interacting protein 1
10989	IMMT	NM_001100169,NM_001100170,NM_006839	52.4	58.19	50.35	59.41	45.13	68.27	69.5	67.03	67.58	65.68	inner membrane mitochondrial protein
1595	CYP51A1	NM_000786,NM_001146152	52.76	58.14	43.89	69.72	34.51	54.67	58.25	58.82	63.38	56.74	cytochrome P450 family 51 subfamily A member 1
5347	PLK1	NM_005030	89.97	58.11	61.29	47.47	33.04	127.58	106.53	104.65	62.64	94.95	polo like kinase 1
64710	NUCKS1	NM_022731	59.82	58.06	54.99	56.95	39.87	56.63	57.91	54.45	47.5	52.97	nuclear casein kinase and cyclin dependent kinase substrate 1
51599	LSR	NM_001260489,NM_001260490,NM_015925,NM_205834,NM_205835	50.36	57.95	49.46	61.81	60.11	43.42	59.07	58.82	65.52	57.37	lipolysis stimulated lipoprotein receptor
2530	FUT8	NM_004480,NM_178155,NM_178156	72.68	57.93	86.19	46.66	79.53	20.14	23.16	13.27	14.12	13.86	fucosyltransferase 8
9791	PTDSS1	NM_001290225,NM_014754	60.52	57.92	48.08	63.16	38.03	90.45	92.56	92.29	97.32	97.3	phosphatidylserine synthase 1
5887	RAD23B	NM_001244713,NM_001244724,NM_002874	61.31	57.89	51.89	53.16	44.93	62.73	59.04	57	55.61	53.17	RAD23 homolog B, nucleotide excision repair protein
4074	M6PR	NM_001207024,NM_002355	64.94	57.85	61.67	60.75	62.38	87.88	87.6	85.1	88.07	85.44	mannose-6-phosphate receptor, cation dependent
52	ACP1	NM_001040649,NM_004300,NM_007099	69.47	57.8	52.13	62.02	52.76	61.92	56.01	53.94	55.29	50.41	acid phosphatase 1
4580	MTX1	NM_002455,NM_198883	44.75	57.75	48.84	58.66	48.22	32.76	32.11	33.16	36.24	34.97	metaxin 1
54107	POLE3	NM_001278255,NM_017443	64.34	57.73	50.12	62.36	43.96	61.27	57.81	57.53	63.55	59.97	DNA polymerase epsilon 3, accessory subunit
51645	PPIL1	NM_016059	61.73	57.73	59.12	57.63	54.9	57.79	57.78	56.55	53.77	54.02	peptidylprolyl isomerase like 1
51014	TMED7	NM_181836	73.5	57.73	69.83	57.98	76.21	45	41.09	42.32	41.92	41.1	transmembrane p24 trafficking protein 7
813	CALU	NM_001130674,NM_001199671,NM_001199672,NM_001199673,NM_001219	57.62	57.71	52.44	62.65	49.43	60.46	60.63	66.58	66.92	69.55	calumenin
5886	RAD23A	NM_001270362,NM_001270363,NM_005053	51.56	57.7	55.62	41.38	59.83	90.97	77.25	80.67	52.35	81.18	RAD23 homolog A, nucleotide excision repair protein
54206	ERRFI1	NM_018948	56.89	57.67	41.08	52.33	55.86	106.39	114.87	99.88	77.34	98.07	ERBB receptor feedback inhibitor 1
9180	OSMR	NM_001168355,NM_001323504,NM_001323505,NM_001323506,NM_001323507,NM_003999	59.67	57.64	60.87	56.82	56.11	23.56	22.12	25.14	21.86	25.44	oncostatin M receptor
64975	MRPL41	NM_032477	46.84	57.63	53.31	52.91	55.99	71.52	70.02	72.88	67.57	70.04	mitochondrial ribosomal protein L41
57819	LSM2	NM_021177	56.58	57.61	50.07	60.2	44.39	80.01	86.91	80.08	83.87	78.61	LSM2 homolog, U6 small nuclear RNA and mRNA degradation associated
55629	PNRC2	NM_017761	57.87	57.58	62.23	59	60.2	31.81	31.01	29.51	24.51	28.46	proline rich nuclear receptor coactivator 2
22836	RHOBTB3	NM_014899	45.56	57.54	52.37	62.73	57.6	8.45	8.57	7.83	9.15	8.24	Rho related BTB domain containing 3
3704	ITPA	NM_001267623,NM_001324236,NM_001324237,NM_001324238,NM_001324240,NM_001351739,NM_033453,NM_181493	49.57	57.54	51.39	56.54	48.27	24.38	23.97	23.32	24.18	24.8	inosine triphosphatase
79709	COLGALT1	NM_024656	57.39	57.51	51.5	57.07	52.42	33.52	33.76	31.33	34.71	31.85	collagen beta(1-O)galactosyltransferase 1
51290	ERGIC2	NM_016570	58.08	57.5	60.37	64.78	54.13	65.48	64.92	70.88	70.21	71.46	ERGIC and golgi 2
79711	IPO4	NM_024658	57.89	57.49	42.53	55.24	33.07	29.43	30.84	30.66	31.58	30.96	importin 4
4041	LRP5	NM_001291902,NM_002335	52.84	57.45	77.7	42.33	81.99	32.95	30.12	27.51	26.01	28.17	LDL receptor related protein 5
51593	SRRT	NM_001128852,NM_001128853,NM_001128854,NM_015908	54.72	57.37	41.9	57.64	34.25	67.46	73.29	70	77.16	74.62	serrate, RNA effector molecule
79710	MORC4	NM_001085354,NM_024657	37.83	57.36	39.12	66.04	26.59	125.23	127.76	172.4	135.87	181.04	MORC family CW-type zinc finger 4
347902	AMIGO2	NM_001143668,NM_181847	82.29	57.35	66.89	51.74	53.33	79.93	63.17	56.29	45.19	52.28	adhesion molecule with Ig like domain 2
6651	SON	NM_001291411,NM_001291412,NM_032195,NM_138927	64.56	57.3	59.5	56.27	64.33	64.25	58.94	55.73	54.72	52.47	SON DNA binding protein
4697	NDUFA4	NM_002489	48.88	57.29	46.51	62.68	40.7	48.74	48.47	50.34	62.4	54.72	NDUFA4, mitochondrial complex associated
397	ARHGDIB	NM_001175,NM_001321420,NM_001321421,NM_001321422,NM_001321423	45.58	57.28	67.27	66.43	61.48	150.34	237.73	162.69	278.79	191.54	Rho GDP dissociation inhibitor beta
6434	TRA2B	NM_001243879,NM_004593	71.8	57.26	54.12	52.34	44.85	68.14	63.78	61.98	57.84	60.48	transformer 2 beta homolog
10483	SEC23B	NM_001172745,NM_001172746,NM_006363,NM_032985,NM_032986	53.49	57.23	53.52	64.05	49.37	20.01	19.1	21.74	20.05	22.21	Sec23 homolog B, coat complex II component
7332	UBE2L3	NM_001256355,NM_001256356,NM_003347	60.08	57.14	55.71	62.21	55.01	137.3	139.06	131.24	144.42	135.22	ubiquitin conjugating enzyme E2 L3
5756	TWF1	NM_001242397,NM_002822	71.77	57.11	58.02	62.28	57.96	94.23	92.04	98.81	103.94	100.69	twinfilin actin binding protein 1
64949	MRPS26	NM_030811	47.4	57.11	45.98	54.13	38.61	23.8	24.05	24.56	22.71	23.91	mitochondrial ribosomal protein S26
5716	PSMD10	NM_002814,NM_170750	53.34	56.99	63.98	58.78	62.2	57.49	53.45	63.34	57.6	61.01	proteasome 26S subunit, non-ATPase 10
2067	ERCC1	NM_001166049,NM_001983,NM_202001	46.48	56.94	50.49	60.18	55.44	44.64	46.53	49.81	48.6	49.13	ERCC excision repair 1, endonuclease non-catalytic subunit
4171	MCM2	NM_004526	59.32	56.93	46.27	53.84	35.72	61	71.06	58.1	69.44	59.84	minichromosome maintenance complex component 2
823	CAPN1	NM_001198868,NM_001198869,NM_005186	47.88	56.92	54.37	56.4	60.99	74.78	79.6	77.04	75.27	71.03	calpain 1
10920	COPS8	NM_006710,NM_198189	54.96	56.91	54.72	62.95	53.42	40.72	35.7	44	42.35	43.08	COP9 signalosome subunit 8
3028	HSD17B10	NM_001037811,NM_004493	53.11	56.88	52.78	56	50.68	71.82	67.58	78.24	74.62	78.83	hydroxysteroid 17-beta dehydrogenase 10
54344	DPM3	NM_018973,NM_153741	30.62	56.72	60.6	70.4	54.05	30.41	27.29	38.42	35.88	36.45	dolichyl-phosphate mannosyltransferase subunit 3
29789	OLA1	NM_001011708,NM_001328688,NM_013341	63.14	56.69	50.5	60.75	43.97	58.7	54.15	59.87	57.92	59.11	Obg like ATPase 1
51096	UTP18	NM_016001	60.51	56.67	52.84	56.55	39.46	37.54	33.52	34.65	28.74	31.4	UTP18, small subunit processome component
1265	CNN2	NM_001303499,NM_001303501,NM_004368,NM_201277	76.1	56.65	64.38	54.32	55.23	68.06	83.93	74.3	74.19	68.22	calponin 2
4116	MAGOH	NM_002370	52.83	56.65	47.81	52.53	45.88	43.54	57.4	43.89	59.29	50.56	mago homolog, exon junction complex core component
10531	PITRM1	NM_001242307,NM_001242309,NM_001347725,NM_001347726,NM_001347727,NM_001347728,NM_001347729,NM_001347730,NM_014889	56.17	56.64	52.52	60.23	48.3	54.79	49.01	59.97	54.8	62.67	pitrilysin metallopeptidase 1
28988	DBNL	NM_001014436,NM_001122956,NM_001284313,NM_001284315,NM_014063	51.8	56.63	53.67	52.43	45.36	55.51	52.55	61.08	50.8	57.18	drebrin like
5885	RAD21	NM_006265	69.88	56.56	63.59	57.81	57.44	96.36	106.21	96.92	84.17	96.66	RAD21 cohesin complex component
4179	CD46	NM_002389,NM_153826,NM_172350,NM_172351,NM_172352,NM_172353,NM_172359,NM_172361	56.72	56.55	56.65	61.44	53.22	39.26	40.17	42.24	41.36	44.5	CD46 molecule
27430	MAT2B	NM_013283,NM_182796	49.05	56.53	56.1	60.56	55.51	42.53	47.55	50.78	51.73	50.22	methionine adenosyltransferase 2B
10330	CNPY2	NM_001190991,NM_014255	49.04	56.52	58.2	63.49	57.38	103.45	105.91	102.45	129.89	103.76	canopy FGF signaling regulator 2
25798	BRI3	NM_001159491,NM_015379	51.49	56.48	71.3	58.96	100.01	130.32	107.21	119.48	107.29	115.94	brain protein I3
4430	MYO1B	NM_001130158,NM_001161819,NM_001330237,NM_001330238,NM_012223	71.48	56.3	57.61	57.28	60.19	16.07	16.69	17.31	13.88	16.42	myosin IB
664	BNIP3	NM_004052	48.49	56.25	57.96	62.39	55.13	28.57	30.42	29.33	34.19	30.49	BCL2 interacting protein 3
51203	NUSAP1	NM_001243142,NM_001243143,NM_001243144,NM_001301136,NM_016359,NM_018454	53.83	56.18	61.25	67.95	48.58	70.63	85.65	94.31	87.2	92.48	nucleolar and spindle associated protein 1
1155	TBCB	NM_001281,NM_001300971	50.68	56.18	56.33	57.78	49.23	44.83	40.32	48.37	38.71	47.29	tubulin folding cofactor B
84061	MAGT1	NM_032121	55.34	56.14	65.17	58.48	61.94	49.08	53.52	55.4	59.49	57.19	magnesium transporter 1
7360	UGP2	NM_001001521,NM_006759	53.5	56.06	55.4	61.21	52.64	58.79	61.5	68.78	61.24	64.58	UDP-glucose pyrophosphorylase 2
79650	USB1	NM_001195302,NM_001204911,NM_001330568,NM_001330569,NM_024598	44.71	56.03	51.56	57.74	57.23	47.92	52.28	47.38	56.27	49.91	U6 snRNA biogenesis phosphodiesterase 1
9554	SEC22B	NM_004892	50.34	55.98	55.23	58.66	57.75	39.37	39.82	40.41	41.13	43.11	SEC22 homolog B, vesicle trafficking protein (gene/pseudogene)
79035	NABP2	NM_024068	46.7	55.97	47.73	61.01	39.5	137.56	145.8	144.61	148.44	146.04	nucleic acid binding protein 2
54443	ANLN	NM_001284301,NM_001284302,NM_018685	72.19	55.96	55.51	57.16	37.07	83.84	82.04	88.72	73.16	85.82	anillin actin binding protein
10492	SYNCRIP	NM_001159673,NM_001159674,NM_001159675,NM_001159676,NM_001159677,NM_001253771,NM_006372	104.96	55.95	66.3	49.91	50.92	83.83	73.95	66.04	59.23	57.59	synaptotagmin binding cytoplasmic RNA interacting protein
7077	TIMP2	NM_003255	48.21	55.91	79.9	59.69	90.5	88.46	94.01	81.99	99.98	78.96	TIMP metallopeptidase inhibitor 2
2647	BLOC1S1	NM_001487	39.97	55.9	49.76	65.95	45.57	96.24	98.15	118.3	126.42	112.87	biogenesis of lysosomal organelles complex 1 subunit 1
26001	RNF167	NM_001320356,NM_001320357,NM_001320358,NM_001320359,NM_001320360,NM_001320361,NM_001320362,NM_001320363,NM_001320364,NM_001320365,NM_015528	59.57	55.84	55.39	58.42	59.86	66.37	58.71	63.08	55.04	65.86	ring finger protein 167
5573	PRKAR1A	NM_001276289,NM_001276290,NM_001278433,NM_002734,NM_212471,NM_212472	58.94	55.76	65.76	54.39	65.86	47.16	47.68	53.12	50.18	52.43	protein kinase cAMP-dependent type I regulatory subunit alpha
54539	NDUFB11	NM_001135998,NM_019056	45.35	55.74	54.28	56.65	57.09	101.04	100.73	99.26	110.44	104.9	NADH:ubiquinone oxidoreductase subunit B11
4141	MARS	NM_004990	57.62	55.73	55.92	49.7	56.82	111.15	110.9	109.82	93.26	115.49	methionyl-tRNA synthetase
28956	LAMTOR2	NM_001145264,NM_014017	54.33	55.69	60.09	50.38	60.37	35.59	32.34	31.71	32.53	32.55	late endosomal/lysosomal adaptor, MAPK and MTOR activator 2
2194	FASN	NM_004104	49.43	55.68	29.17	44.78	17.54	97.63	103.38	122.02	106.6	114.61	fatty acid synthase
10093	ARPC4	NM_001024959,NM_001024960,NM_001198780,NM_005718	60.6	55.66	54.22	55.03	55.7	60.23	55.96	59.15	59.87	52.33	actin related protein 2/3 complex subunit 4
3035	HARS	NM_001258040,NM_001258041,NM_001258042,NM_001289092,NM_001289093,NM_001289094,NM_002109	68.33	55.62	58.03	58.73	51.28	58.63	52.61	57.43	55.82	54	histidyl-tRNA synthetase
5631	PRPS1	NM_001204402,NM_002764	40.56	55.58	53.36	61.92	47.17	61.01	58.67	72.54	73.36	79.53	phosphoribosyl pyrophosphate synthetase 1
51024	FIS1	NM_016068	50.41	55.58	47.65	61.94	43.79	96.39	90.02	105.96	105.61	108.55	fission, mitochondrial 1
7511	XPNPEP1	NM_001167604,NM_001324128,NM_001324131,NM_001324132,NM_001324133,NM_001324134,NM_001324135,NM_001324136,NM_020383	57.78	55.57	61	54.27	55.17	32.95	29.6	32.44	30.18	36.17	X-prolyl aminopeptidase 1
4258	MGST2	NM_001204366,NM_001204367,NM_001204368,NM_002413	58.36	55.57	59.1	54.33	51.31	64.17	65.2	67.31	63.68	61.63	microsomal glutathione S-transferase 2
55696	RBM22	NM_018047	54.94	55.55	54.6	61.53	57.66	35.14	34.28	34.79	36.32	36.11	RNA binding motif protein 22
2873	GPS1	NM_001321089,NM_001321090,NM_001321091,NM_001321092,NM_001321093,NM_001330539,NM_001330541,NM_004127,NM_212492	46.27	55.53	45.76	48.07	43.76	85.04	81.74	85.67	86.48	86.7	G protein pathway suppressor 1
81542	TMX1	NM_030755	62.35	55.52	50.77	60.7	46.43	25.85	24.98	26.2	29.06	25.7	thioredoxin related transmembrane protein 1
28998	MRPL13	NM_014078	63.64	55.51	46.14	60.48	38.92	68.55	69.95	67.6	79.12	66.99	mitochondrial ribosomal protein L13
83641	FAM107B	NM_001282695,NM_001282696,NM_001282697,NM_001282698,NM_001282699,NM_001282700,NM_001282701,NM_001282702,NM_001282703,NM_001320735,NM_001320736,NM_001320737,NM_001320738,NM_001320739,NM_001320740,NM_001320741,NM_031453	53.87	55.49	64.81	54.68	81.13	46.16	49.06	45.51	44.24	47.39	family with sequence similarity 107 member B
23646	PLD3	NM_001031696,NM_001291311,NM_012268	36.02	55.46	66.4	55.32	101.27	34.95	30.17	36.22	30.82	38.22	phospholipase D family member 3
131076	CCDC58	NM_001017928,NM_001308326	71.66	55.44	42.25	61.61	37.78	46.4	47.9	42.28	46.37	43.65	coiled-coil domain containing 58
10054	UBA2	NM_005499	69.4	55.43	52.93	52.94	47.58	35.33	30.54	32.75	28.29	30.84	ubiquitin like modifier activating enzyme 2
63905	MANBAL	NM_001003897,NM_022077	51.88	55.39	55.68	56.37	61.1	69.36	70.05	72.02	82.49	70.69	mannosidase beta like
84058	WDR54	NM_001320823,NM_001320824,NM_001320825,NM_032118	46.6	55.37	55.81	55.96	43.85	24.83	28.62	27.5	28.82	27.41	WD repeat domain 54
8091	HMGA2	NM_001300918,NM_001300919,NM_001330190,NM_003483,NM_003484	74.76	55.36	61.41	47.03	59.44	71.17	43.01	43.7	25.69	41.57	high mobility group AT-hook 2
64928	MRPL14	NM_001318767,NM_001318768,NM_001318769,NM_001318770,NM_001318771,NM_032111	53.55	55.34	48.77	54.69	45.59	43.99	40.9	42.37	45.49	42.68	mitochondrial ribosomal protein L14
158	ADSL	NM_000026,NM_001123378,NM_001317923	54.01	55.29	50.34	52	37.8	44.2	42.99	43.5	42.82	47.18	adenylosuccinate lyase
55858	TMEM165	NM_018475	65.51	55.28	58.59	58.03	60.03	49.04	41.46	43.55	35.7	44.35	transmembrane protein 165
1282	COL4A1	NM_001303110,NM_001845	47.45	55.26	81.44	51.07	81.31	0.07	0.06	0.02	0.04	0.06	collagen type IV alpha 1 chain
283899	INO80E	NM_001304562,NM_001304563,NM_173618	46.28	55.26	45.68	55.19	40.96	47.53	47.46	45.48	42.75	44.79	INO80 complex subunit E
53838	C11orf24	NM_001300913,NM_022338	50.44	55.23	48.81	57.48	41.66	29.5	29.09	34.81	31.64	33.24	chromosome 11 open reading frame 24
23524	SRRM2	NM_016333	59.08	55.21	48.83	44.57	44.2	56.57	52.69	42.54	41.33	41.85	serine/arginine repetitive matrix 2
10140	TOB1	NM_001243877,NM_001243885,NM_005749	43.02	55.2	54.56	57.53	61.03	23.81	22.38	23.26	31.19	25.21	transducer of ERBB2, 1
3988	LIPA	NM_000235,NM_001127605,NM_001288979	40.99	55.19	56.88	65.19	60.98	33.63	31.71	43.42	36.77	42.79	lipase A, lysosomal acid type
9114	ATP6V0D1	NM_004691	52.71	55.17	68.83	56.76	83.63	73.3	61.34	75.43	64.99	71.59	ATPase H+ transporting V0 subunit d1
25764	HYPK	NM_001199885,NM_016400	49.74	55.14	39.83	53.36	40.86	47.32	47.55	52.14	54.51	50.71	huntingtin interacting protein K
26156	RSL1D1	NM_015659	68.44	55.13	47.66	48.22	39.92	60.12	60.46	51.77	64.43	51	ribosomal L1 domain containing 1
5432	POLR2C	NM_032940	56.29	55.05	50.35	55.98	50.5	53.23	52.67	50.8	56.23	51.86	RNA polymerase II subunit C
51497	NELFCD	NM_198976	45.39	55.02	46.01	57.78	40.14	107.65	109.36	105.41	121.87	104.82	negative elongation factor complex member C/D
11235	PDCD10	NM_007217,NM_145859,NM_145860	71.8	54.94	60.07	52.38	63.48	59.74	47.95	54.76	42.06	53.22	programmed cell death 10
767558	LUZP6	NM_001128619	62.18	54.9	52.85	54.23	52.82	60.36	55.51	59.56	58.02	58.67	leucine zipper protein 6
118487	CHCHD1	NM_203298	45.74	54.9	47.61	57.75	41.16	41.54	45.09	45.79	52.49	43.41	coiled-coil-helix-coiled-coil-helix domain containing 1
57636	ARHGAP23	NM_001199417	66.39	54.88	66.59	46.43	58.77	37.83	37.41	27.83	28.81	31.34	Rho GTPase activating protein 23
254863	TMEM256	NM_152766	37.81	54.84	50.56	60.63	40.39	42.34	52.19	54.28	55.46	52.21	transmembrane protein 256
55168	MRPS18A	NM_001193343,NM_018135	43.48	54.83	45.32	48.43	50.83	30.23	28.89	30.22	27.51	29.88	mitochondrial ribosomal protein S18A
11079	RER1	NM_007033	54.2	54.82	57.49	51.75	56.44	64.22	63.96	65.2	72.21	65.63	retention in endoplasmic reticulum sorting receptor 1
58517	RBM25	NM_021239	75.35	54.82	53.13	55.3	47.81	36.3	33.91	31.53	30.67	32.02	RNA binding motif protein 25
23576	DDAH1	NM_001134445,NM_001330655,NM_012137	55.95	54.76	39.25	59.97	29.74	37.48	46.49	43.18	54.05	42.17	dimethylarginine dimethylaminohydrolase 1
23107	MRPS27	NM_001286748,NM_001286751,NM_015084	46.98	54.76	46.14	54.15	35.76	45.77	49.42	42.93	47.77	41.3	mitochondrial ribosomal protein S27
10890	RAB10	NM_016131	61.38	54.7	56.19	53.06	58.74	55.94	45.92	50.92	42.33	49.5	RAB10, member RAS oncogene family
160	AP2A1	NM_014203,NM_130787	41.8	54.7	47.8	54.23	51.76	49.64	50.5	52.55	54.13	55.28	adaptor related protein complex 2 alpha 1 subunit
6607	SMN2	NM_017411,NM_022875,NM_022876,NM_022877	69.95	54.7	49.38	53.02	42.89	24.17	16.81	19.9	15.84	18.1	survival of motor neuron 2, centromeric
22820	COPG1	NM_016128	48.79	54.68	57.47	55.19	61.97	73.2	73.24	80.54	76.22	85.92	coatomer protein complex subunit gamma 1
51073	MRPL4	NM_015956,NM_146387,NM_146388	51.81	54.66	45.11	47.72	41.24	61.92	57.93	53.73	60.36	55.64	mitochondrial ribosomal protein L4
84310	C7orf50	NM_001134395,NM_001134396,NM_001318252,NM_001350968,NM_001350969,NM_001350970,NM_032350	72.54	54.62	56.15	34.87	55.16	67.55	69.57	70.41	64.54	68.41	chromosome 7 open reading frame 50
84908	FAM136A	NM_001329752,NM_001329753,NM_001329755,NM_001329757,NM_001329758,NM_032822	68.04	54.55	48.91	57.59	39.18	59.35	54.71	49.85	56.19	49.42	family with sequence similarity 136 member A
55486	PARL	NM_001037639,NM_001324436,NM_001324437,NM_001324438,NM_018622	55.66	54.54	46.61	56.35	42.12	44.22	44.26	47.81	49.22	48.01	presenilin associated rhomboid like
4085	MAD2L1	NM_002358	66.71	54.52	48.87	58.38	33.92	51.45	55.54	53.44	52.54	52.64	mitotic arrest deficient 2 like 1
22883	CLSTN1	NM_001009566,NM_001302883,NM_014944	53.4	54.51	57.76	50.19	64.99	61.38	60.26	61.57	54.48	60.64	calsyntenin 1
1000	CDH2	NM_001308176,NM_001792	69.36	54.48	57.39	54.91	48.48	0	0.01	0.06	0.04	0.01	cadherin 2
57175	CORO1B	NM_001018070,NM_020441	44.37	54.46	58.74	49.92	70.31	100.49	96.58	90.49	94.08	90.32	coronin 1B
10435	CDC42EP2	NM_006779	39.9	54.45	61.01	50.52	77.13	22.64	16.51	14.41	9.86	13.79	CDC42 effector protein 2
10213	PSMD14	NM_005805	62.83	54.42	54.01	50.57	47.72	83.42	84.47	82.59	79.8	79.65	proteasome 26S subunit, non-ATPase 14
6059	ABCE1	NM_001040876,NM_002940	70.73	54.32	53.05	54.08	44.77	52.45	47.27	46.36	46.65	47.86	ATP binding cassette subfamily E member 1
100131801	PET100	NM_001171155	44.42	54.31	55.85	57.95	45.53	60.82	61.07	60.25	70.18	62.29	PET100 homolog
896	CCND3	NM_001136017,NM_001136125,NM_001136126,NM_001287427,NM_001287434,NM_001760	49.01	54.17	41.65	56.93	47.74	105.89	115.27	107.76	110.37	102.32	cyclin D3
51012	PRELID3B	NM_001256403,NM_016045	64.33	54.15	54.06	58.48	54.31	61.57	54.55	57.41	57.18	56.16	PRELI domain containing 3B
25855	BRMS1	NM_001024957,NM_015399	52.59	54.14	51.43	49.59	53.1	75.08	73.85	83.74	79	87.52	breast cancer metastasis suppressor 1
28973	MRPS18B	NM_014046	43.02	54.09	44.12	52.93	48.3	62.48	62.2	67.79	60.59	68.85	mitochondrial ribosomal protein S18B
5500	PPP1CB	NM_002709,NM_206876	54.79	54.08	62.1	58.86	69.32	34.47	32.1	33.66	33.61	32.78	protein phosphatase 1 catalytic subunit beta
26580	BSCL2	NM_001122955,NM_001130702,NM_032667	39.78	54.07	47.32	56.49	51.09	24.17	20.22	28.55	24.65	27.34	BSCL2, seipin lipid droplet biogenesis associated
8767	RIPK2	NM_003821	47.26	54.06	65.2	59.71	59.99	24.96	23.3	26.81	20.86	26.97	receptor interacting serine/threonine kinase 2
4677	NARS	NM_004539	59.75	53.95	55.55	57.66	54.23	46.38	49.58	50.79	53.74	52.96	asparaginyl-tRNA synthetase
5870	RAB6A	NM_001243718,NM_001243719,NM_002869,NM_198896	58.37	53.95	61	63.13	70.91	78.54	74.98	86.02	74.85	83.1	RAB6A, member RAS oncogene family
9133	CCNB2	NM_004701	69.6	53.77	63.04	56.14	41.25	93.8	100.01	95.53	84.47	90.13	cyclin B2
28978	TMEM14A	NM_014051	49.72	53.76	44.31	59.48	38.61	38.59	36.48	45.9	43.97	47.36	transmembrane protein 14A
4942	OAT	NM_000274,NM_001171814,NM_001322965,NM_001322966,NM_001322967,NM_001322968,NM_001322969,NM_001322970,NM_001322971,NM_001322974	52.51	53.75	66.04	63.16	67.5	58.12	61.85	65.26	74.2	63.55	ornithine aminotransferase
5621	PRNP	NM_000311,NM_001080121,NM_001080122,NM_001080123,NM_001271561,NM_183079	68.78	53.73	95.79	61.52	123.62	42.44	35.47	43.39	34.99	46.36	prion protein
5394	EXOSC10	NM_001001998,NM_002685	49.35	53.72	50.74	54.81	40.17	48.57	48.31	49.98	44.91	49.73	exosome component 10
3725	JUN	NM_002228	54.64	53.71	68.14	46.04	95.04	59.7	41.75	38.98	28.74	40.31	Jun proto-oncogene, AP-1 transcription factor subunit
1736	DKC1	NM_001142463,NM_001288747,NM_001363	78.28	53.71	51.54	48.09	37.56	87.98	74.87	66.87	68.67	64.76	dyskerin pseudouridine synthase 1
56681	SAR1A	NM_001142648,NM_020150	56.81	53.63	57.92	58.44	57.69	43.72	42.99	44.66	47.91	46.24	secretion associated Ras related GTPase 1A
64866	CDCP1	NM_022842,NM_178181	47.89	53.62	75.97	52.05	106.77	43.17	27.57	40.44	22.84	40.93	CUB domain containing protein 1
602	BCL3	NM_005178	29	53.6	49.99	51.97	52.22	9.39	6.68	8.25	5.35	7.97	B cell CLL/lymphoma 3
23640	HSPBP1	NM_001130106,NM_001297600,NM_012267	48.79	53.58	43.5	50.16	42.5	26.94	29.39	28.53	28.82	28.46	HSPA (Hsp70) binding protein 1
51433	ANAPC5	NM_001137559,NM_001330489,NM_016237	48.71	53.51	52.51	49.75	48.6	47.02	45.02	49.5	44.71	48.88	anaphase promoting complex subunit 5
84992	PIGY	NM_001042616	48.27	53.51	59.26	60.92	57.24	25.69	25.84	29.56	32.14	32.09	phosphatidylinositol glycan anchor biosynthesis class Y
6048	RNF5	NM_006913	47.55	53.46	63.7	59.23	78.06	55.19	51.92	58.75	50.19	60.79	ring finger protein 5
518	ATP5MC3	NM_001002258,NM_001190329,NM_001689	53.52	53.44	44.36	54.43	38.31	62.94	61.61	63.56	73.83	61.57	ATP synthase membrane subunit c locus 3
388789	SMIM26	NM_001348957,NM_001348958	45.1	53.4	57.35	65.49	57	19.4	17.28	18.5	19.87	20.24	small integral membrane protein 26
2149	F2R	NM_001311313,NM_001992	43.6	53.34	78.05	54.63	79.66	11.74	9.65	10.32	8.5	10.38	coagulation factor II thrombin receptor
8148	TAF15	NM_003487,NM_139215	63.25	53.32	48.64	51.65	35.51	96.71	109.18	107.87	111	104.53	TATA-box binding protein associated factor 15
1716	DGUOK	NM_001318859,NM_001318860,NM_001318861,NM_001318862,NM_001318863,NM_080916,NM_080918	47.16	53.25	44.67	58.35	51.82	55.83	53.77	47.6	59.48	54.76	deoxyguanosine kinase
23256	SCFD1	NM_001257376,NM_001283031,NM_001283032,NM_001283033,NM_016106,NM_182835	50.19	53.24	45.81	58.1	49.38	31.27	26.8	34.58	29.37	33.91	sec1 family domain containing 1
10038	PARP2	NM_001042618,NM_005484	39.06	53.21	38.43	60.6	35.66	19.48	24.66	29.1	26.73	31.34	poly(ADP-ribose) polymerase 2
4780	NFE2L2	NM_001145412,NM_001145413,NM_001313900,NM_001313901,NM_001313902,NM_001313903,NM_001313904,NM_006164	59.18	53.2	63.22	64.36	77.73	37.43	36.2	38.1	35.16	36.13	nuclear factor, erythroid 2 like 2
2317	FLNB	NM_001164317,NM_001164318,NM_001164319,NM_001457	63.8	53.16	36	47.03	41.46	14.33	14.82	13.1	13.48	15.67	filamin B
23423	TMED3	NM_001301203,NM_001330376,NM_007364	53.23	53.16	46.04	54.1	43.79	67.7	71.45	65.05	77.26	64.18	transmembrane p24 trafficking protein 3
6051	RNPEP	NM_001319182,NM_001319183,NM_001319184,NM_020216	47.37	53.13	43.56	59.15	39.35	51.19	59.81	57.97	66.9	59.55	arginyl aminopeptidase
9188	DDX21	NM_001256910,NM_004728	94.03	53.11	52.72	48.14	46.59	77.77	57.49	53.22	47.9	50.56	DExD-box helicase 21
51121	RPL26L1	NM_001317980,NM_001317981,NM_001317982,NM_016093	74.39	53.07	58.44	51.4	54.53	63.43	58.82	57.21	57.42	57.18	ribosomal protein L26 like 1
55101	DMAC2	NM_001167867,NM_001167868,NM_001167869,NM_001167870,NM_001167871,NM_001320838,NM_001320839,NM_001320840,NM_001320841,NM_001320844,NM_018035	35.91	53.05	37.93	52.6	35.59	31.08	35.25	34.23	41.46	40.12	distal membrane arm assembly complex 2
2582	GALE	NM_000403,NM_001008216,NM_001127621	42.7	53.03	51.08	47.93	56.18	26.39	25.57	29.1	22.21	30.15	UDP-galactose-4-epimerase
4702	NDUFA8	NM_001318195,NM_014222	49.9	53.01	51.78	63.86	43.7	50.26	48.7	51.52	57.32	51.9	NADH:ubiquinone oxidoreductase subunit A8
23399	CTDNEP1	NM_001143775,NM_015343	58.52	52.99	59.72	50.11	59.96	79.24	76.44	77.42	76.05	75.38	CTD nuclear envelope phosphatase 1
27102	EIF2AK1	NM_001134335,NM_014413	53.58	52.98	55.18	56.73	51.37	51.15	52.92	52.13	55.71	55.76	eukaryotic translation initiation factor 2 alpha kinase 1
115939	TSR3	NM_001001410	56.24	52.92	53.06	46.28	58.67	56.24	61.28	57.76	53.83	51.04	TSR3, acp transferase ribosome maturation factor
124976	SPNS2	NM_001124758	53.42	52.89	48.69	39.03	51.12	28.69	32.85	22.08	23.1	18.28	sphingolipid transporter 2
3133	HLA-E	NM_005516	36.95	52.87	88.13	64.21	176.47	55.36	63.27	59.4	76.49	68.45	major histocompatibility complex, class I, E
10105	PPIF	NM_005729	59.16	52.84	43.66	51.95	52.12	88.22	88.48	69.09	86.91	71.97	peptidylprolyl isomerase F
7057	THBS1	NM_003246	128.01	52.83	50.05	41.67	32.33	67.51	60.9	39.25	44.48	40.86	thrombospondin 1
374395	TMEM179B	NM_199337	34.09	52.66	64.23	64.84	73.59	41.85	39.16	47.58	49.65	53.04	transmembrane protein 179B
8533	COPS3	NM_001199125,NM_001316354,NM_001316355,NM_001316356,NM_001316357,NM_001316358,NM_003653	52.1	52.63	46.73	60.28	39.41	56.94	58.15	61.63	60.63	64.76	COP9 signalosome subunit 3
23585	TMEM50A	NM_014313	50.6	52.63	68.11	63.02	86.08	27.21	27.44	26.62	30.15	29.7	transmembrane protein 50A
55272	IMP3	NM_018285	47.86	52.61	54.34	49.06	51.23	49.82	42.18	43.32	46.28	40.21	IMP3, U3 small nucleolar ribonucleoprotein
55884	WSB2	NM_001278557,NM_001278558,NM_018639	52.06	52.59	53.23	56.09	50.57	49.71	39.85	48.94	40.64	51.52	WD repeat and SOCS box containing 2
6767	ST13	NM_001278589,NM_003932	56.87	52.58	55.18	56.95	54.77	69.72	71.21	68.26	75.27	71.75	ST13, Hsp70 interacting protein
10437	IFI30	NM_006332	44.21	52.56	49.29	61.7	75.4	39.68	38.42	57.27	51.01	59.34	IFI30, lysosomal thiol reductase
6590	SLPI	NM_003064	73.48	52.53	123.81	71.54	169.59	14.57	10.67	16.39	14.48	15.2	secretory leukocyte peptidase inhibitor
55752	2022-09-11	NM_001306147,NM_018243	51.4	52.49	52.08	55.43	40.9	45.45	47.7	55.95	52.7	58.2	septin 11
688	KLF5	NM_001286818,NM_001730	60.63	52.44	58.59	50.15	62.81	41.49	40.46	46.56	33.65	44.29	Kruppel like factor 5
10962	MLLT11	NM_006818	37	52.42	70.13	63.93	93.39	34.02	25.74	41	33.96	41.41	MLLT11, transcription factor 7 cofactor
23463	ICMT	NM_012405	44.82	52.39	57.33	55.52	51.41	45.54	43.74	52.85	50.42	56.41	isoprenylcysteine carboxyl methyltransferase
8896	BUD31	NM_003910	58.42	52.36	55.04	53.04	63.27	102.36	95.98	103.33	101.66	104.42	BUD31 homolog
231	AKR1B1	NM_001346142,NM_001628	34.84	52.33	46.38	57.58	69.56	103.3	62.17	151.89	75.36	179.34	aldo-keto reductase family 1 member B
9049	AIP	NM_001302959,NM_001302960,NM_003977	34.09	52.29	43.26	57.2	49.12	66.28	64.53	73.38	68.73	73.63	aryl hydrocarbon receptor interacting protein
10618	TGOLN2	NM_001206840,NM_001206841,NM_001206844,NM_006464	51.24	52.28	55.68	54.79	58.98	46.3	41.08	45.12	40.12	48.44	trans-golgi network protein 2
10988	METAP2	NM_001317182,NM_001317183,NM_001330246,NM_006838	64.05	52.28	46.63	56.67	38.68	53.76	52.72	47.85	55.88	46.34	methionyl aminopeptidase 2
1017	CDK2	NM_001290230,NM_001798,NM_052827	47.99	52.27	47.8	57.46	39.01	94.21	113.54	100.72	114.17	102.72	cyclin dependent kinase 2
5510	PPP1R7	NM_001282409,NM_001282410,NM_001282411,NM_001282412,NM_001282413,NM_001282414,NM_002712	46.44	52.19	48.51	60.23	44.04	41.12	41.25	44.82	46.74	45	protein phosphatase 1 regulatory subunit 7
262	AMD1	NM_001287214,NM_001287215,NM_001287216,NM_001634	64.8	52.15	61.18	51.71	57.36	62.09	54.32	57.24	44.18	53.63	adenosylmethionine decarboxylase 1
2746	GLUD1	NM_001318900,NM_001318901,NM_001318902,NM_001318904,NM_001318905,NM_001318906,NM_005271	49.82	52.14	53.34	57.82	51.88	88.31	93.91	88.66	97.5	87.49	glutamate dehydrogenase 1
4680	CEACAM6	NM_002483	25.17	52.14	38.57	56.44	43.04	0.95	1.13	0.42	0.91	0.15	carcinoembryonic antigen related cell adhesion molecule 6
11266	DUSP12	NM_007240	51.59	52.11	53.91	56.2	55.64	23.25	23.48	24.37	24.42	22.01	dual specificity phosphatase 12
23412	COMMD3	NM_012071	46.67	52.09	52.01	55.46	50.94	32.96	32.57	40.84	36.6	36.33	COMM domain containing 3
4609	MYC	NM_001354870,NM_002467	62.05	52.07	60.58	44.57	63.65	34.03	24.38	22.38	15.58	20.01	MYC proto-oncogene, bHLH transcription factor
5434	POLR2E	NM_001316323,NM_001316324,NM_002695	49.67	52.05	39.1	50.62	34.69	54.29	56.82	51.95	57.61	53.37	RNA polymerase II subunit E
10904	BLCAP	NM_001167820,NM_001167821,NM_001167822,NM_001167823,NM_001317074,NM_001317075,NM_006698	55.41	52.01	67.59	59.02	76.09	51.99	54.13	51.21	55.09	57.08	bladder cancer associated protein
4059	BCAM	NM_001013257,NM_005581	45.37	51.92	52.06	51.73	49.17	9.28	10.84	8.82	11.53	8.68	basal cell adhesion molecule (Lutheran blood group)
9375	TM9SF2	NM_004800	55.23	51.88	58.18	54.22	69.23	68.95	64.34	69.6	64.86	69.04	transmembrane 9 superfamily member 2
5329	PLAUR	NM_001005376,NM_001005377,NM_001301037,NM_002659	49.58	51.85	64.59	59.64	101.51	33.11	23.02	25.12	24.26	28.72	plasminogen activator, urokinase receptor
3397	ID1	NM_002165,NM_181353	40.98	51.84	28.74	38.27	27.45	32	21.61	33.47	20.58	31.05	inhibitor of DNA binding 1, HLH protein
6046	BRD2	NM_001113182,NM_001199455,NM_001199456,NM_001291986,NM_005104	62.81	51.83	63.12	46.18	81.55	87.25	84.23	82.81	69.73	83.47	bromodomain containing 2
28987	NOB1	NM_014062	55.68	51.76	44.59	44.45	44.88	58.92	55.77	50.35	55.26	47.96	NIN1/PSMD8 binding protein 1 homolog
201595	STT3B	NM_178862	55.07	51.74	52.58	55.22	47.86	48.49	47.38	52.12	50.6	48.9	STT3B, catalytic subunit of the oligosaccharyltransferase complex
10273	STUB1	NM_001293197,NM_005861	52.46	51.74	51.98	39.08	51.46	50.08	48.24	52.73	46.2	50.21	STIP1 homology and U-box containing protein 1
5970	RELA	NM_001145138,NM_001243984,NM_001243985,NM_021975	41.63	51.72	45.61	50.76	57.25	68.72	65.64	66.11	59.08	69.3	RELA proto-oncogene, NF-kB subunit
64759	TNS3	NM_022748	58.06	51.71	62.66	38.3	44.91	40.96	34.34	29.2	20.07	27.81	tensin 3
54148	MRPL39	NM_017446,NM_080794	51.77	51.7	42.77	58.62	33.82	24.93	25.08	26.09	26.79	27.85	mitochondrial ribosomal protein L39
56882	CDC42SE1	NM_001038707,NM_020239	61.77	51.7	57.17	52.32	58.43	29.7	27.78	28.35	25.3	27.59	CDC42 small effector 1
10007	GNPDA1	NM_005471	45.29	51.68	46.22	54.31	58.89	35.72	38.46	36.65	44.25	38.46	glucosamine-6-phosphate deaminase 1
1869	E2F1	NM_005225	31.93	51.68	33.9	66.38	36.03	48.52	53.64	51.03	68.54	58.13	E2F transcription factor 1
10051	SMC4	NM_001002800,NM_001288753,NM_005496	76.36	51.67	58.73	43.19	40.62	69.69	73.12	63.84	56.68	59.37	structural maintenance of chromosomes 4
51002	TPRKB	NM_001330386,NM_001330387,NM_001330388,NM_001330389,NM_001330390,NM_001330391,NM_001330392,NM_016058	49.02	51.64	40.22	56.86	35.51	36.36	35.76	36.13	47.37	38.41	TP53RK binding protein
91368	CDKN2AIPNL	NM_080656	56.98	51.63	49.21	54.67	38.24	20.88	21	19.61	20.27	18.44	CDKN2A interacting protein N-terminal like
10987	COPS5	NM_006837	47.08	51.59	45.04	50.55	42.24	56.06	54.73	58.69	57.04	56.31	COP9 signalosome subunit 5
2935	GSPT1	NM_001130006,NM_001130007,NM_002094	55.97	51.53	46.95	53.01	43.96	59.83	55.3	58.3	58.87	56.46	G1 to S phase transition 1
57804	POLD4	NM_001256870,NM_021173	28.22	51.53	56.1	46.01	72.51	52.9	51.81	58.99	53.83	57.69	DNA polymerase delta 4, accessory subunit
2969	GTF2I	NM_001163636,NM_001280800,NM_001518,NM_032999,NM_033000,NM_033001	42.66	51.51	55.94	49.41	48.2	139.57	142.01	135.52	119.79	130.22	general transcription factor IIi
23623	RUSC1	NM_001105203,NM_001105204,NM_001105205,NM_001278227,NM_001278228,NM_001278229,NM_001278230,NM_014328	39.4	51.48	42.52	59.5	46.55	32.73	35.97	43.77	43.19	44.73	RUN and SH3 domain containing 1
7027	TFDP1	NM_007111	47.74	51.44	39.76	45.72	33.06	79.98	84.87	81.93	83.91	82.7	transcription factor Dp-1
56942	CMC2	NM_001351967,NM_001351968,NM_001351970,NM_001351973,NM_020188	45.05	51.42	39.18	49.74	37.59	51.73	48.3	58.82	58.97	56.09	C-X9-C motif containing 2
24148	PRPF6	NM_012469	45.43	51.41	45.78	45.72	45.45	63.71	64.75	64.46	57.14	63.73	pre-mRNA processing factor 6
9961	MVP	NM_001293204,NM_001293205,NM_005115,NM_017458	30.67	51.4	65.57	49.8	78.35	86.56	71.84	93.99	68.92	91.96	major vault protein
10591	DNPH1	NM_006443,NM_199184	32.25	51.39	35.23	59.46	36.28	53.78	58.37	66.17	70.5	63.73	2'-deoxynucleoside 5'-phosphate N-hydrolase 1
7443	VRK1	NM_003384	53.51	51.37	45.38	58.56	33.42	19.08	18.32	19.55	20.54	18.77	vaccinia related kinase 1
9939	RBM8A	NM_005105	54.7	51.34	51.56	55.26	48.38	35.54	36.37	38.7	42.93	39.71	RNA binding motif protein 8A
4150	MAZ	NM_001042539,NM_001276275,NM_001276276,NM_002383	65.87	51.23	60.84	43.99	58.49	69.93	67.74	55.32	56.03	50.95	MYC associated zinc finger protein
118472	ZNF511	NM_145806	43.74	51.23	39.95	56.64	31.56	44.29	45.94	47.8	39.91	47.6	zinc finger protein 511
10797	MTHFD2	NM_006636	60.93	51.21	45.53	44.12	48.04	48.43	48.96	45.76	40.97	45.9	methylenetetrahydrofolate dehydrogenase (NADP+ dependent) 2, methenyltetrahydrofolate cyclohydrolase
10049	DNAJB6	NM_005494,NM_058246	62.08	51.2	53.3	50.79	50.57	99.64	95.87	90.57	91.31	89.68	DnaJ heat shock protein family (Hsp40) member B6
6050	RNH1	NM_002939,NM_203383,NM_203384,NM_203385,NM_203386,NM_203387,NM_203388,NM_203389	42.88	51.18	42.89	46.83	46.66	94.06	100.09	98.38	92.74	97.69	ribonuclease/angiogenin inhibitor 1
3911	LAMA5	NM_005560	39.36	51.18	48.61	37.98	49.36	16.6	15.04	15.38	11.42	15.06	laminin subunit alpha 5
23333	DPY19L1	NM_015283	38.41	51.17	56.92	58.51	56.24	60.75	57.06	63.43	60.33	68.6	dpy-19 like C-mannosyltransferase 1
10594	PRPF8	NM_006445	51.73	51.16	44.9	48.79	36.31	80.22	88.04	89.53	85.77	93.31	pre-mRNA processing factor 8
80218	NAA50	NM_001308445,NM_025146	59.23	51.15	41.73	52.28	36.68	44.44	42.54	42.61	47.12	44.26	N(alpha)-acetyltransferase 50, NatE catalytic subunit
10884	MRPS30	NM_016640	55.08	51.13	57.65	49.62	55.08	32.23	28.96	29.83	30.29	29.27	mitochondrial ribosomal protein S30
9582	APOBEC3B	NM_001270411,NM_004900	37.92	51.11	58.83	59.53	51.25	26.68	30.73	38.76	33.93	41.81	apolipoprotein B mRNA editing enzyme catalytic subunit 3B
57228	SMAGP	NM_001031628,NM_001033873	63.01	51.08	45.84	52.96	40.73	81.94	82.83	69.92	73.68	66.48	small cell adhesion glycoprotein
84232	MAF1	NM_032272	42.63	51.02	51.67	44.49	52.75	67.83	76.97	66.82	75.64	73.51	MAF1 homolog, negative regulator of RNA polymerase III
113452	TMEM54	NM_001329722,NM_001329723,NM_001329724,NM_001329725,NM_033504	43.85	51.01	36.58	54	38.05	67.47	95.74	80.83	104.25	76.43	transmembrane protein 54
113246	C12orf57	NM_001301834,NM_001301836,NM_001301837,NM_001301838,NM_138425	42.06	50.99	72.18	52.36	68.58	68.54	65.13	75.19	81.34	78.59	chromosome 12 open reading frame 57
79171	RBM42	NM_001319113,NM_024321	50.01	50.92	50.76	46.01	51.45	44.59	43.43	41.42	41.56	42.06	RNA binding motif protein 42
126003	TRAPPC5	NM_001042461,NM_001042462,NM_174894	36.19	50.88	44.2	52.1	37.94	42.07	37.35	40.65	44.26	42.2	trafficking protein particle complex 5
989	2022-09-07	NM_001011553,NM_001242956,NM_001788	57.12	50.88	55.89	55.57	48.22	52.57	52.21	53.5	53.7	54.57	septin 7
50809	HP1BP3	NM_016287	52.49	50.87	59.56	52.02	49.95	26.71	28.31	28.8	27.32	29.69	heterochromatin protein 1 binding protein 3
84844	PHF5A	NM_032758	52.58	50.83	43.52	47.49	32.75	35.88	35.49	33.96	36.6	30.59	PHD finger protein 5A
8942	KYNU	NM_001032998,NM_001199241,NM_003937	43.36	50.82	66.05	51.8	96.77	1.5	1.71	2.65	1.43	3.24	kynureninase
220869	CBWD5	NM_001024916,NM_001286835,NM_001286836,NM_001330668	43.08	50.79	53.06	50.4	40.01	47.86	47.13	48.88	55.18	47.65	COBW domain containing 5
8703	B4GALT3	NM_001199873,NM_001199874,NM_003779	46.27	50.76	52.76	49.7	52.36	24.92	23.97	25.75	23.33	26.88	beta-1,4-galactosyltransferase 3
9219	MTA2	NM_001330292,NM_004739	56.16	50.73	47.2	53.1	44.45	45.11	43.1	44.15	41.92	42.11	metastasis associated 1 family member 2
64943	NT5DC2	NM_001134231,NM_022908	52.33	50.73	30.04	51.79	24.89	48.24	56.49	50.77	70.64	57.95	5'-nucleotidase domain containing 2
84299	MIEN1	NM_001330206,NM_032339	33.13	50.73	47.27	56.93	53.04	36.44	36.52	41.17	42.57	43.39	migration and invasion enhancer 1
10544	PROCR	NM_006404	48.24	50.71	32.86	53.27	34.5	89.29	94.35	97.25	107.28	92.99	protein C receptor
23234	DNAJC9	NM_015190	41	50.69	40.5	54.11	32.81	45.42	49.12	50.46	54.87	51.6	DnaJ heat shock protein family (Hsp40) member C9
51501	HIKESHI	NM_001322404,NM_001322407,NM_001322409,NM_016401	48.29	50.69	46.05	53.42	41.28	53.66	55.71	57.14	62.01	54.72	Hikeshi, heat shock protein nuclear import factor
6382	SDC1	NM_001006946,NM_002997	54.69	50.69	37.04	43.51	28.85	104.05	92.16	89.37	78.7	79.03	syndecan 1
55744	COA1	NM_001321197,NM_001321198,NM_001321199,NM_001321200,NM_001321201,NM_001321202,NM_001321203,NM_001321204,NM_001321205,NM_001350924,NM_001350925,NM_001350926,NM_001350927,NM_001350928,NM_018224	53.18	50.66	55.68	53.33	45.22	90.73	81.81	97.46	86.18	106.16	cytochrome c oxidase assembly factor 1 homolog
4149	MAX	NM_001271068,NM_001271069,NM_001320415,NM_002382,NM_145112,NM_145113,NM_145114,NM_197957	48.24	50.55	61.87	51.85	70.13	26.46	23.22	24.99	22.43	27.47	MYC associated factor X
23344	ESYT1	NM_001184796,NM_015292	50.33	50.55	52.96	54.87	49.41	78.64	85.09	86.59	88.71	86.8	extended synaptotagmin 1
54921	CHTF8	NM_001039690,NM_001040146	50.7	50.45	47.49	52.17	51.21	59.41	62.26	54.37	53.56	50.08	chromosome transmission fidelity factor 8
6606	SMN1	NM_000344,NM_001297715,NM_022874	68.14	50.42	48.05	61.3	39.91	37.91	42.65	38.37	44.21	38.13	survival of motor neuron 1, telomeric
81671	VMP1	NM_001329394,NM_001329395,NM_001329396,NM_001329397,NM_001329398,NM_001329399,NM_001329400,NM_001329401,NM_001329402,NM_030938	49.65	50.38	60.79	47.53	62.68	108.25	94.72	101.44	84.29	99.33	vacuole membrane protein 1
9230	RAB11B	NM_004218	37.77	50.35	48.12	45.79	51.36	77.11	75.41	71.43	74.06	75.76	RAB11B, member RAS oncogene family
6635	SNRPE	NM_001304464,NM_001328637,NM_001328638,NM_003094	48.79	50.35	45.14	52.92	35.17	40.2	51.36	48.13	59.92	48.68	small nuclear ribonucleoprotein polypeptide E
80279	CDK5RAP3	NM_001278197,NM_001278198,NM_001278216,NM_001278217,NM_176096	43.13	50.34	52.53	47.69	44.63	31.85	30.19	28.84	32.76	31.65	CDK5 regulatory subunit associated protein 3
51503	CWC15	NM_016403	60.71	50.3	50.62	54.57	50.42	70.78	66.72	69.58	65.09	70.86	CWC15 spliceosome associated protein homolog
4817	NIT1	NM_001185092,NM_001185093,NM_001185094,NM_005600	42.54	50.23	47.47	53.9	44.95	15.07	16.12	19.94	14.22	16.08	nitrilase 1
2030	SLC29A1	NM_001078175,NM_001078177,NM_001304462,NM_001304463,NM_001304465,NM_001304466	47.43	50.21	47.17	55.44	38.63	47.5	45.27	47.98	49.4	51.36	solute carrier family 29 member 1 (Augustine blood group)
4175	MCM6	NM_005915	54.08	50.19	39.03	49.47	25.17	41.69	50.9	41.51	54.45	40.86	minichromosome maintenance complex component 6
58533	SNX6	NM_021249,NM_152233	51.14	50.17	57.18	53.18	57.8	27.65	30.46	26.96	32.57	26.47	sorting nexin 6
6301	SARS	NM_001330669,NM_006513	61.32	50.16	59.78	38.27	76.48	70.4	66.79	59.95	51.58	65.05	seryl-tRNA synthetase
6731	SRP72	NM_001267722,NM_006947	53.87	50.16	45.47	51.33	39.28	57.24	57.31	59.49	63.79	62.25	signal recognition particle 72
7846	TUBA1A	NM_001270399,NM_001270400,NM_006009	32.64	50.11	117.1	55.07	146.61	54.94	32.07	53.01	39.96	55.06	tubulin alpha 1a
7358	UGDH	NM_001184700,NM_001184701,NM_003359	49.05	50.1	36.69	53.99	47.47	40.21	46.54	47.59	44.39	47.58	UDP-glucose 6-dehydrogenase
26298	EHF	NM_001206615,NM_001206616,NM_012153	42.46	50.04	62.25	49.29	67.83	10.71	13.99	12.5	9.04	11.07	ETS homologous factor
968	CD68	NM_001040059,NM_001251	27.72	50.01	59.92	58.63	113.75	19.93	19.9	25.52	25.91	31.06	CD68 molecule
80145	THOC7	NM_001285387,NM_001285404,NM_025075	55.92	50	38.71	61.53	35.64	47.58	51.82	50.53	61.85	56.08	THO complex 7
11167	FSTL1	NM_007085	62.36	49.95	62.61	48.04	41.37	38.88	45.46	32.31	48.6	37.06	follistatin like 1
4967	OGDH	NM_001003941,NM_001165036,NM_002541	39.25	49.93	39.8	51.22	37.94	31.63	34.7	35.72	33.66	35.82	oxoglutarate dehydrogenase
8542	APOL1	NM_001136540,NM_001136541,NM_003661,NM_145343	32.28	49.93	73.56	51.7	96.56	15.88	15.79	18.23	16.54	18.43	apolipoprotein L1
553115	PEF1	NM_012392	41.84	49.89	47.23	50.58	47.26	47.34	50.17	49.77	51.33	47.89	penta-EF-hand domain containing 1
25915	NDUFAF3	NM_199069,NM_199070,NM_199073,NM_199074	38.07	49.78	40.88	51.5	34.84	44.35	43.93	52.98	48.34	52.62	NADH:ubiquinone oxidoreductase complex assembly factor 3
6709	SPTAN1	NM_001130438,NM_001195532,NM_003127	53.93	49.78	50.09	45.31	43.93	45.52	41.14	51.96	37.22	51.2	spectrin alpha, non-erythrocytic 1
4712	NDUFB6	NM_001199987,NM_002493,NM_182739	42.43	49.77	40.8	50.62	36.69	45.33	40.46	43.51	57.27	50.03	NADH:ubiquinone oxidoreductase subunit B6
10605	PAIP1	NM_006451,NM_182789,NM_183323	59.68	49.77	59.78	51.17	59	43.05	34.96	36.36	35.09	37.67	poly(A) binding protein interacting protein 1
3490	IGFBP7	NM_001253835,NM_001553	34.05	49.74	81.38	53.06	66.14	494.29	522.44	511.93	575.25	501.38	insulin like growth factor binding protein 7
3705	ITPK1	NM_001142593,NM_001142594,NM_014216	58.15	49.74	39.75	33.75	33.39	30.23	35.49	29.6	30.3	30.49	inositol-tetrakisphosphate 1-kinase
3843	IPO5	NM_002271	55.17	49.74	39.25	50.88	28.61	62.18	67.43	64.86	73.5	62.46	importin 5
6150	MRPL23	NM_021134	48.89	49.71	48.44	41.94	38.25	115.82	125.91	120.28	123.26	119.41	mitochondrial ribosomal protein L23
1388	ATF6B	NM_001136153,NM_004381	41.89	49.7	55.98	46.26	60.72	48.9	55.1	51.29	49.53	47.47	activating transcription factor 6 beta
4259	MGST3	NM_004528	38.37	49.68	56.06	57.78	60.48	27.9	22.43	33.57	28.71	35.03	microsomal glutathione S-transferase 3
55148	UBR7	NM_175748	37.08	49.66	47.48	58.78	41.47	24.79	23.81	28	27.41	31.59	ubiquitin protein ligase E3 component n-recognin 7 (putative)
64083	GOLPH3	NM_022130	53.23	49.66	55.51	51.8	69.49	38.33	37.37	35.62	29.38	35.02	golgi phosphoprotein 3
51241	COX16	NM_001204090,NM_016468	48.71	49.62	43.71	56.97	36.34	22.72	24.63	25.09	29.66	25	COX16, cytochrome c oxidase assembly homolog
3685	ITGAV	NM_001144999,NM_001145000,NM_002210	40.61	49.59	47.39	54.85	48.31	24.67	33.45	27.17	36.67	28.49	integrin subunit alpha V
55627	SMPD4	NM_001171083,NM_017751,NM_017951	47.79	49.52	39.41	47.86	34.21	37.22	39.26	38.19	38.44	37.16	sphingomyelin phosphodiesterase 4
5701	PSMC2	NM_001204453,NM_002803	50.12	49.51	45.28	51.59	44.35	79.49	77.99	79.7	81.37	76.76	proteasome 26S subunit, ATPase 2
8883	NAE1	NM_001018159,NM_001018160,NM_001286500,NM_003905	53.79	49.51	50.07	54.08	45.07	51.74	53.91	56.02	58.72	55.03	NEDD8 activating enzyme E1 subunit 1
6657	SOX2	NM_003106	54.81	49.5	72.6	43.43	65.24	2.14	1.61	1.06	0.76	0.94	SRY-box 2
2305	FOXM1	NM_001243088,NM_001243089,NM_021953,NM_202002,NM_202003	48.53	49.4	41.87	53.64	28.51	131.81	146.09	150.99	138.71	150.55	forkhead box M1
26010	SPATS2L	NM_001100422,NM_001100423,NM_001100424,NM_001282735,NM_001282743,NM_001282744,NM_015535	49.04	49.39	56.14	43.98	52.61	51.95	40.25	48.82	35.51	49.43	spermatogenesis associated serine rich 2 like
3421	IDH3G	NM_004135,NM_174869	41.22	49.38	48.9	47.03	45.12	94.15	82.37	91.06	89.15	95.57	isocitrate dehydrogenase 3 (NAD(+)) gamma
401466	C8orf59	NM_001099670,NM_001099671,NM_001099672,NM_001099673,NM_001293320	52.29	49.38	43.22	57.2	32.52	50.75	49.2	47.38	57.38	52.77	chromosome 8 open reading frame 59
14	AAMP	NM_001087,NM_001302545	46.08	49.38	47.59	46.98	45.54	46.74	48.17	50.75	47.9	47.93	angio associated migratory cell protein
2590	GALNT2	NM_001291866,NM_004481	45.3	49.35	47.74	44.16	43.18	69.68	59.02	66.99	54.7	67.47	polypeptide N-acetylgalactosaminyltransferase 2
26064	RAI14	NM_001145520,NM_001145521,NM_001145522,NM_001145523,NM_001145525,NM_015577	55.97	49.32	54.82	46.19	49.04	13.05	13.33	13.79	12.09	12.16	retinoic acid induced 14
2193	FARSA	NM_004461	50.78	49.29	44.37	44.12	39.07	65.75	59.64	62.34	56.66	60.9	phenylalanyl-tRNA synthetase alpha subunit
51399	TRAPPC4	NM_001318486,NM_001318488,NM_001318489,NM_001318490,NM_001318492,NM_001318494,NM_016146	46.56	49.29	41.1	45.88	40.91	47.16	45.15	49.81	45.91	47.37	trafficking protein particle complex 4
27247	NFU1	NM_001002755,NM_001002756,NM_015700	32.89	49.26	40.67	50.74	33.35	39.95	41.46	48.76	44.02	47.79	NFU1 iron-sulfur cluster scaffold
6692	SPINT1	NM_001032367,NM_003710,NM_181642	54.24	49.26	49	48.56	56.33	16.35	15.68	14.52	13.94	14.63	serine peptidase inhibitor, Kunitz type 1
1841	DTYMK	NM_001165031,NM_001320902,NM_001320903,NM_001320904,NM_001320905,NM_012145	49.55	49.25	42.39	42.07	32.61	61.5	69.42	67.47	61.88	70.38	deoxythymidylate kinase
29074	MRPL18	NM_001318817,NM_014161	50.05	49.23	46.45	48.94	38.71	73.91	76.65	82.46	73.46	74.96	mitochondrial ribosomal protein L18
23020	SNRNP200	NM_014014	52.04	49.18	44.69	44.56	38.38	56	54.02	57.95	51.59	59.41	small nuclear ribonucleoprotein U5 subunit 200
56947	MFF	NM_001277061,NM_001277062,NM_001277063,NM_001277064,NM_001277065,NM_001277066,NM_001277067,NM_001277068,NM_020194	44.6	49.15	45.93	52	45.15	41.82	42.7	46.46	44.3	44.16	mitochondrial fission factor
7336	UBE2V2	NM_003350	63.58	49.08	44.86	50.88	42.86	46.34	43.38	45.19	44.12	43.28	ubiquitin conjugating enzyme E2 V2
1848	DUSP6	NM_001946,NM_022652	51.06	49.05	67.74	50.17	94.13	14.32	12.04	14.78	10.48	16.82	dual specificity phosphatase 6
64114	TMBIM1	NM_001321427,NM_001321428,NM_001321429,NM_001321430,NM_001321432,NM_001321433,NM_001321435,NM_001321436,NM_001321438,NM_022152	50.7	49.04	52.31	52.08	63.95	63.12	59.18	60.16	63.45	59.1	transmembrane BAX inhibitor motif containing 1
22870	PPP6R1	NM_014931	46.95	49.02	42.37	47.51	49.22	44.16	44.32	45.41	41.1	44.92	protein phosphatase 6 regulatory subunit 1
22916	NCBP2	NM_001042540,NM_001308036,NM_007362	50.54	49.02	47.34	45.46	41.43	41.31	41.68	37.45	44.02	34.66	nuclear cap binding protein subunit 2
284184	NDUFAF8	NM_001086521,NM_001353402,NM_001353403	36.96	48.98	40.43	44.58	30.32	85.99	88.33	90.58	105.26	97.81	NADH:ubiquinone oxidoreductase complex assembly factor 8
1798	DPAGT1	NM_001382	42.4	48.94	57.16	52.62	54.26	50.68	57.49	60.25	66.57	63.48	dolichyl-phosphate N-acetylglucosaminephosphotransferase 1
9521	EEF1E1	NM_001135650,NM_004280	44.79	48.92	42.6	53.43	33.83	31.19	29.48	32.24	32.35	32.53	eukaryotic translation elongation factor 1 epsilon 1
9531	BAG3	NM_004281	42.11	48.83	50.73	45.56	57.66	107.65	109.71	113.81	102.24	109.48	BCL2 associated athanogene 3
26520	TIMM9	NM_001304485,NM_001304486,NM_001304487,NM_001304488,NM_001304489,NM_001304490,NM_001304491,NM_012460	57.61	48.78	46.81	46.22	43.98	34.66	30.59	31.62	30.33	30.82	translocase of inner mitochondrial membrane 9
2648	KAT2A	NM_021078	43.45	48.76	44.66	45.55	48.5	33	34.77	28.92	30.63	28.47	lysine acetyltransferase 2A
6238	RRBP1	NM_001042576,NM_004587	62.61	48.76	52.4	47.93	63.04	12.83	13.73	15.12	13.83	14.76	ribosome binding protein 1
5445	PON2	NM_000305,NM_001018161	43.23	48.75	63.88	53.79	99.99	95.05	92.97	94.91	104.06	101.64	paraoxonase 2
7532	YWHAG	NM_012479	64.28	48.74	50.52	52.08	49.87	85.45	73.36	74.36	70.72	71.12	tyrosine 3-monooxygenase/tryptophan 5-monooxygenase activation protein gamma
9368	SLC9A3R1	NM_004252	48.47	48.67	50.98	42.57	51.95	71.33	80.56	71.89	79.3	71.31	SLC9A3 regulator 1
22928	SEPHS2	NM_012248	46.64	48.66	58.08	52.5	68.4	47.12	47.93	50.51	45.17	48.22	selenophosphate synthetase 2
8772	FADD	NM_003824	37.84	48.59	46.73	48.2	46.9	62.03	50.4	48.59	40.49	39.61	Fas associated via death domain
10121	ACTR1A	NM_005736	41.54	48.56	50.06	52.54	47.95	56.91	55.05	60.19	52.6	59.89	ARP1 actin related protein 1 homolog A
374393	FAM111B	NM_001142703,NM_001142704,NM_198947	42.25	48.54	44.68	69.14	33.41	27.08	38.33	37.68	56.79	42.32	family with sequence similarity 111 member B
2664	GDI1	NM_001493	45.17	48.51	53.97	55.83	65.29	63.7	53.96	69.66	61.77	72.73	GDP dissociation inhibitor 1
9861	PSMD6	NM_001271779,NM_001271780,NM_001271781,NM_014814	56.21	48.51	50.33	53.5	42.98	45.04	44.56	43.6	44.6	42.24	proteasome 26S subunit, non-ATPase 6
51023	MRPS18C	NM_001297767,NM_001297769,NM_001297770,NM_016067	55.2	48.47	41.22	55.34	42.01	42.15	40.42	44.93	46.31	44.25	mitochondrial ribosomal protein S18C
113026	PLCD3	NM_133373	40.91	48.47	51.44	40.38	59.57	44.57	45.12	42.56	40.75	41.61	phospholipase C delta 3
56893	UBQLN4	NM_001304342,NM_020131	39.02	48.45	47.64	50.78	46.28	25.81	28.43	30	31.41	32.45	ubiquilin 4
2483	FRG1	NM_004477	50.7	48.43	47.36	56.51	50.95	46.93	55.61	51.23	56.77	60.27	FSHD region gene 1
389177	TMEM212	NM_001164436	39.94	48.41	46.82	50.65	44.12	58.79	62.51	58.86	56.55	57.07	transmembrane protein 212
27095	TRAPPC3	NM_001270894,NM_001270895,NM_001270896,NM_001270897,NM_014408	41.45	48.39	47.8	49.51	44.85	57.12	58.55	58.28	64.35	57.08	trafficking protein particle complex 3
55851	PSENEN	NM_001281532,NM_172341	41.68	48.38	51.21	47.97	56.75	43.64	40.99	42.09	43.05	37.54	presenilin enhancer gamma-secretase subunit
25921	ZDHHC5	NM_015457	48.58	48.38	54.14	49.19	57.07	43.89	42.73	44.21	38.16	44.79	zinc finger DHHC-type containing 5
11051	NUDT21	NM_007006	57.05	48.38	47.48	48.61	40.34	50.08	58.52	49.48	57.53	48.96	nudix hydrolase 21
84193	SETD3	NM_032233,NM_199123	56.74	48.36	45.71	51.43	45.79	37.22	34.47	38.35	32.13	35.08	SET domain containing 3
65008	MRPL1	NM_020236	44.26	48.3	36.29	54.66	30.91	35.5	41.03	41.61	44.39	42.48	mitochondrial ribosomal protein L1
56889	TM9SF3	NM_020123	58.18	48.29	51.5	51.82	54.83	52.11	50.55	48.54	51.03	47.82	transmembrane 9 superfamily member 3
51550	CINP	NM_001320046,NM_032630	62.3	48.29	39.27	45.36	36.09	43.78	42.17	45	36.69	43.9	cyclin dependent kinase 2 interacting protein
6856	SYPL1	NM_006754,NM_182715	50.7	48.25	41.22	52.04	43.6	78.35	74.42	77.1	73.69	76.14	synaptophysin like 1
3572	IL6ST	NM_001190981,NM_002184,NM_175767	46.53	48.24	54.57	50.57	65.23	33.06	35.09	32.5	35.22	34.59	interleukin 6 signal transducer
381	ARF5	NM_001662	49.14	48.23	48.06	53.29	42.61	80.85	81.21	75.43	88.96	76.25	ADP ribosylation factor 5
51021	MRPS16	NM_016065	45.37	48.23	44.86	48.99	38.92	54.04	51.12	55.6	49.92	54.13	mitochondrial ribosomal protein S16
153339	TMEM167A	NM_174909	47.77	48.21	52.28	58.09	49.44	23.01	25.05	29.34	32.54	29.84	transmembrane protein 167A
9674	KIAA0040	NM_001162893,NM_001162894,NM_001162895,NM_001319230,NM_001319231,NM_014656	25.69	48.19	70.19	47.77	73.02	1.14	1.81	2.31	1.92	1.89	KIAA0040
55737	VPS35	NM_018206	53.89	48.18	56.04	50.95	52.76	44.14	44.73	47.88	48.14	45.95	VPS35, retromer complex component
56005	MYDGF	NM_019107	44.51	48.17	50.85	46.53	56.3	80.75	77.41	84.64	91.04	80.33	myeloid derived growth factor
79869	CPSF7	NM_001136040,NM_001142565,NM_024811	43.97	48.09	41.2	47.41	43.48	46.33	43.56	39.64	34.04	41.52	cleavage and polyadenylation specific factor 7
64855	FAM129B	NM_001035534,NM_022833	49.59	48.08	57.61	42.01	71.17	64.53	54.44	56.8	43.95	58.16	family with sequence similarity 129 member B
3998	LMAN1	NM_005570	43.75	48.06	44.19	53.49	44.89	29.68	32.04	34.91	38.77	35.55	lectin, mannose binding 1
9075	CLDN2	NM_001171092,NM_001171095,NM_020384	24.99	48.06	11.88	52.61	6.5	329.27	377.32	353.64	325.76	314.17	claudin 2
261726	TIPRL	NM_001031800,NM_152902	44.96	48.03	47.09	48.5	44.59	29.62	25.81	29	27.21	29.76	TOR signaling pathway regulator
1874	E2F4	NM_001950	55.82	48	51.75	44.75	53.43	66.42	64.42	59.34	52.02	54.24	E2F transcription factor 4
1315	COPB1	NM_001144061,NM_001144062,NM_016451	50.22	47.98	51.02	52.82	52.2	68.01	74.71	82.53	80.57	81.23	coatomer protein complex subunit beta 1
7324	UBE2E1	NM_001202476,NM_003341,NM_182666	48.29	47.97	40.77	45.93	41.11	70.32	67.47	65.61	71.52	64.87	ubiquitin conjugating enzyme E2 E1
7494	XBP1	NM_001079539,NM_005080	50.17	47.96	52.29	39.99	68.13	46.58	47.58	48.05	40.71	45.48	X-box binding protein 1
858	CAV2	NM_001206747,NM_001206748,NM_001233,NM_198212	62.55	47.91	32.52	44.26	22.75	72.92	65.27	66.98	57.07	66.77	caveolin 2
91942	NDUFAF2	NM_174889	57.66	47.9	46.36	55.32	48.31	45.72	49.99	53.33	61.52	57.94	NADH:ubiquinone oxidoreductase complex assembly factor 2
162461	TMEM92	NM_001168215,NM_153229	32.58	47.88	33.51	44.62	32.95	2.84	6	2.94	4.78	3.33	transmembrane protein 92
10611	PDLIM5	NM_001011513,NM_001011515,NM_001011516,NM_001256425,NM_001256426,NM_001256427,NM_001256428,NM_001256429,NM_006457	44.05	47.87	46.84	44.95	50.69	13.99	12.63	13.23	10.46	14.13	PDZ and LIM domain 5
80135	RPF1	NM_025065	49.89	47.84	40.3	55.34	38.65	37.46	40.24	42.96	38.06	42.17	ribosome production factor 1 homolog
2799	GNS	NM_002076	37.35	47.83	54.94	50.07	62.78	38.67	34.8	40.98	37.27	41.61	glucosamine (N-acetyl)-6-sulfatase
60559	SPCS3	NM_021928	46.23	47.82	44.69	57.91	37.31	30.26	34.63	35.76	40.11	36.02	signal peptidase complex subunit 3
5049	PAFAH1B2	NM_001184746,NM_001184747,NM_001184748,NM_001309431,NM_002572	49.39	47.81	47.07	51.33	48.72	48.75	45.58	48.72	39.66	44.29	platelet activating factor acetylhydrolase 1b catalytic subunit 2
57149	LYRM1	NM_001128301,NM_001128302,NM_001302835,NM_001302836,NM_020424	36.52	47.78	63.01	52.15	56.21	16.54	16.28	16.34	15.77	16.12	LYR motif containing 1
5110	PCMT1	NM_001252049,NM_001252050,NM_001252051,NM_001252052,NM_001252053,NM_005389	46.2	47.73	42.96	53.29	42.09	53.26	52.39	56.59	57.3	57.49	protein-L-isoaspartate (D-aspartate) O-methyltransferase
2653	GCSH	NM_004483	57.85	47.71	37.36	56.76	29.46	50.59	55.93	49.7	67.4	49.87	glycine cleavage system protein H
10436	EMG1	NM_001320049,NM_006331	50.76	47.69	34.46	46.28	26.53	83.21	86.25	81.87	87.97	81.89	EMG1, N1-specific pseudouridine methyltransferase
51714	SELENOT	NM_016275	50.96	47.68	45.5	57.65	42.51	47.43	45.37	49.84	53.74	49.21	selenoprotein T
118	ADD1	NM_001119,NM_001286645,NM_001354754,NM_001354755,NM_001354756,NM_001354757,NM_001354758,NM_001354759,NM_001354761,NM_001354762,NM_014189,NM_014190,NM_176801	46.55	47.65	45.68	45.81	42.62	59.52	58.34	57.05	50.79	55.82	adducin 1
8209	C21orf33	NM_001320383,NM_001320384,NM_004649,NM_198155	40.32	47.6	43.94	42.55	40.47	37.85	34.53	31.33	34.62	33.26	chromosome 21 open reading frame 33
10787	NCKAP1	NM_013436,NM_205842	56.48	47.59	48.4	46.71	50.87	42.74	41.68	42.4	38.89	40.92	NCK associated protein 1
84365	NIFK	NM_032390	70.21	47.56	47.6	49.01	45.12	49.4	46.23	39.24	43.63	37.95	nucleolar protein interacting with the FHA domain of MKI67
6879	TAF7	NM_005642	52.57	47.52	62.49	45.94	69.62	49.84	54.77	52.87	51.23	50.32	TATA-box binding protein associated factor 7
55860	ACTR10	NM_018477	45.2	47.4	44.59	55.7	45.91	22.56	19.42	23.68	21.88	24.11	actin related protein 10 homolog
7980	TFPI2	NM_001271003,NM_001271004,NM_006528	54.3	47.39	67.59	57.95	70.06	0.02	0	0.05	0.02	0.07	tissue factor pathway inhibitor 2
3936	LCP1	NM_002298	58.3	47.37	53.37	51.13	54.8	0.14	0.04	0.1	0.06	0.2	lymphocyte cytosolic protein 1
11143	KAT7	NM_001199155,NM_001199156,NM_001199157,NM_001199158,NM_001346706,NM_007067	40.04	47.37	40.87	47.75	40.19	20.66	22.53	23.94	20.29	23.35	lysine acetyltransferase 7
1666	DECR1	NM_001330575,NM_001359	34.05	47.34	48.06	51.62	41.04	44.28	37.38	44.36	45.17	43.51	2,4-dienoyl-CoA reductase 1
8766	RAB11A	NM_001206836,NM_004663	48.99	47.3	53.89	51.4	51.62	37.53	33.91	39.45	38.51	39.06	RAB11A, member RAS oncogene family
6652	SORD	NM_003104	40.71	47.27	40.44	50.15	38.91	31.79	40.21	33.51	44.96	33.66	sorbitol dehydrogenase
93487	MAPK1IP1L	NM_144578	41.59	47.21	40.23	50.71	39.84	19.77	19.94	19.5	19.93	19.91	mitogen-activated protein kinase 1 interacting protein 1 like
1503	CTPS1	NM_001301237,NM_001905	49.02	47.18	38.26	45	26.32	61.65	50	52.22	50.42	51.5	CTP synthase 1
373156	GSTK1	NM_001143679,NM_001143680,NM_001143681,NM_015917	34.83	47.15	43.07	55.47	40.39	87.05	91.27	91.56	105.28	94.04	glutathione S-transferase kappa 1
5880	RAC2	NM_002872	43.49	47.1	47.53	45.52	58.46	54.67	55.07	51.08	52.6	50.94	Rac family small GTPase 2
54849	DEF8	NM_001242816,NM_001242817,NM_001242818,NM_001242819,NM_001242820,NM_001242821,NM_001242822,NM_017702,NM_207514	38.89	47.1	35.87	47.14	31.83	38.59	41.21	44.03	45.39	42.76	differentially expressed in FDCP 8 homolog
10095	ARPC1B	NM_005720	38.11	47.05	41.58	47.54	45.7	129.56	118.38	148.19	136.47	152.87	actin related protein 2/3 complex subunit 1B
11332	ACOT7	NM_007274,NM_181864,NM_181865,NM_181866	55.13	47.04	52.26	44.08	48.91	49.93	56.76	56.29	62.08	55.01	acyl-CoA thioesterase 7
200879	LIPH	NM_139248	32.76	47.03	50.44	44.69	67.88	11.98	7.44	10.47	5.89	9.55	lipase H
4676	NAP1L4	NM_005969	48.95	47.02	47.92	52.02	45.76	69.61	65.27	70.72	63.5	70.43	nucleosome assembly protein 1 like 4
23196	FAM120A	NM_001286722,NM_001286723,NM_001286724,NM_014612	50.6	47.02	47.1	45.61	39.44	69.94	77.16	72.33	79.81	71.13	family with sequence similarity 120A
85437	ZCRB1	NM_033114	40.79	46.99	40.26	51.85	37.95	56.68	54.78	62.66	59.39	62.58	zinc finger CCHC-type and RNA binding motif containing 1
4247	MGAT2	NM_002408	55.58	46.96	54.66	53.15	58.16	27.15	26.33	29.6	26.74	30.95	mannosyl (alpha-1,6-)-glycoprotein beta-1,2-N-acetylglucosaminyltransferase
51082	POLR1D	NM_001206559,NM_015972,NM_152705	56.65	46.96	36.51	47.23	37.25	60.77	63.2	53.72	68.2	52.37	RNA polymerase I subunit D
10056	FARSB	NM_005687	63.37	46.95	52.14	33.33	41.12	45.93	40.58	44.81	35.88	44.99	phenylalanyl-tRNA synthetase beta subunit
51520	LARS	NM_001317964,NM_001317965,NM_016460,NM_020117	45.34	46.87	47.43	47.61	45.24	31.29	32.24	35.46	35.18	38.78	leucyl-tRNA synthetase
55585	UBE2Q1	NM_017582	47.25	46.87	50.67	51.35	59.43	35.65	30.26	38.06	36.62	39.31	ubiquitin conjugating enzyme E2 Q1
79004	CUEDC2	NM_024040	35.13	46.87	48.03	46.61	44.3	51.92	53.12	53.6	58.68	50.22	CUE domain containing 2
734	OSGIN2	NM_001126111,NM_004337	38.23	46.84	41.28	47.56	32.63	20.18	15.93	24.25	16.95	27.68	oxidative stress induced growth inhibitor family member 2
11240	PADI2	NM_007365	63.79	46.77	52.59	54.34	26.31	0.96	1.47	1.84	1.82	1.63	peptidyl arginine deiminase 2
29105	CFAP20	NM_013242	49.37	46.76	44.79	54.86	47.47	41.03	44.57	45.38	50.46	44.16	cilia and flagella associated protein 20
5357	PLS1	NM_001145319,NM_001172312,NM_002670	46.65	46.7	46.53	45.46	38.63	26.38	25.72	30.2	26.85	27.77	plastin 1
4232	MEST	NM_001253900,NM_001253901,NM_001253902,NM_002402,NM_177524,NM_177525	64.28	46.69	49.3	48.39	37.55	2.67	1.91	2.89	2.74	3	mesoderm specific transcript
2037	EPB41L2	NM_001135554,NM_001135555,NM_001199388,NM_001252660,NM_001350299,NM_001350301,NM_001350302,NM_001350303,NM_001350304,NM_001350305,NM_001350306,NM_001350307,NM_001350308,NM_001350309,NM_001350310,NM_001350311,NM_001350312,NM_001350313,NM_001350314,NM_001350315,NM_001350320,NM_001431	50.08	46.68	45.45	48.44	33.68	57.15	62.5	58.49	57.72	59.41	erythrocyte membrane protein band 4.1 like 2
120	ADD3	NM_001121,NM_001320591,NM_001320592,NM_001320593,NM_001320594,NM_016824,NM_019903	39.25	46.67	55.21	45.79	53.3	19.45	23.03	22.21	23.17	22.68	adducin 3
51031	GLOD4	NM_016080	47.69	46.66	48.98	51.11	45.12	32.93	30.29	31.01	29.78	31	glyoxalase domain containing 4
5050	PAFAH1B3	NM_001145939,NM_001145940,NM_002573	35.13	46.63	39.98	49.03	39.7	45.65	47.01	52.71	50.51	51.54	platelet activating factor acetylhydrolase 1b catalytic subunit 3
3459	IFNGR1	NM_000416	33.78	46.6	55.44	49.74	59.17	10.86	10.93	11.96	9.22	12.37	interferon gamma receptor 1
1635	DCTD	NM_001012732,NM_001351743,NM_001351744,NM_001351745,NM_001351747,NM_001351748,NM_001351750,NM_001351753,NM_001921	50.46	46.6	46.69	45.61	51.6	55.99	52.57	48.62	49.98	49.95	dCMP deaminase
56984	PSMG2	NM_020232,NM_147163	55.41	46.56	48.94	51.62	45.1	31.72	29.49	30.53	26.55	31.01	proteasome assembly chaperone 2
79033	ERI3	NM_001301698,NM_001301699,NM_001301700,NM_001301701,NM_024066	43.57	46.51	44.89	45.8	42.11	58.37	58.89	50.79	57.4	51.99	ERI1 exoribonuclease family member 3
114049	BUD23	NM_001202560,NM_017528	47.29	46.51	45.97	52.23	42.7	66.04	58.44	76.02	74.24	80.5	BUD23, rRNA methyltransferase and ribosome maturation factor
144501	KRT80	NM_001081492,NM_182507	68.16	46.5	47.45	41.87	41.6	18.48	20.27	16.18	16.75	15.35	keratin 80
6118	RPA2	NM_001286076,NM_001297558,NM_001355128,NM_001355129,NM_002946	39.3	46.5	42.77	48.89	42.73	20.33	20.32	18.63	19.39	19.91	replication protein A2
5269	SERPINB6	NM_001195291,NM_001271822,NM_001271823,NM_001271824,NM_001271825,NM_001297699,NM_001297700,NM_004568	35.96	46.45	53.09	51.47	55.62	38.36	40.17	38.79	37.19	43.06	serpin family B member 6
55041	PLEKHB2	NM_001100623,NM_001267062,NM_001267063,NM_001267064,NM_001267065,NM_001267066,NM_001267067,NM_001267068,NM_001309448,NM_001309450,NM_001309451,NM_001309452,NM_017958	54.16	46.45	48.32	47.05	50.47	43.71	38.44	43.74	39.11	45.52	pleckstrin homology domain containing B2
2958	GTF2A2	NM_001320929,NM_001320930,NM_004492	54.48	46.4	39.92	52.82	36.71	43.31	40.39	48.62	50.82	46.33	general transcription factor IIA subunit 2
401115	C4orf48	NM_001141936,NM_001168243	30.25	46.37	42.49	42.29	58.89	67.4	64.96	70.09	70.38	66.97	chromosome 4 open reading frame 48
140465	MYL6B	NM_001199629,NM_002475	36.08	46.34	47.61	48.02	44.43	112.81	109.51	115.18	108.47	112.59	myosin light chain 6B
5557	PRIM1	NM_000946	39.92	46.29	36.13	46.32	26.84	37.43	44.78	45.04	37.04	47.35	DNA primase subunit 1
10423	CDIPT	NM_001286585,NM_001286586,NM_006319	40.99	46.28	46.6	51.07	55.33	45.98	47.11	46.75	49.67	44.33	CDP-diacylglycerol--inositol 3-phosphatidyltransferase
6747	SSR3	NM_001308197,NM_001308204,NM_001308205,NM_007107	62.63	46.27	51.13	50.09	50.57	64.12	62.89	61.19	64.72	60.25	signal sequence receptor subunit 3
6431	SRSF6	NM_006275	57.33	46.25	53.61	44.84	48.49	69.91	65.33	67.05	59.15	62.09	serine and arginine rich splicing factor 6
6993	DYNLT1	NM_001291602,NM_001291603,NM_006519	42.97	46.24	52.83	53.36	51.96	57.26	49.32	61.57	58.04	62.14	dynein light chain Tctex-type 1
1051	CEBPB	NM_001285878,NM_001285879,NM_005194	30.81	46.2	40.6	45.06	88.79	38.33	35.68	40.57	33.05	46.46	CCAAT/enhancer binding protein beta
9410	SNRNP40	NM_004814	56.26	46.18	43.7	40.48	34.58	50.92	56.86	50.29	53.55	46.12	small nuclear ribonucleoprotein U5 subunit 40
2921	CXCL3	NM_002090	47.85	46.15	22.41	41.83	17.98	0.4	0.15	0.39	0.15	0.5	C-X-C motif chemokine ligand 3
122769	LRR1	NM_152329,NM_203467	42.85	46.1	35.36	47.84	25.48	21.31	20.64	23.38	22.93	21.12	leucine rich repeat protein 1
197370	NSMCE1	NM_145080	48.15	46.1	48.01	44.3	44.16	52.92	54.08	47.73	45.3	48.01	NSE1 homolog, SMC5-SMC6 complex component
10755	GIPC1	NM_005716,NM_202468,NM_202469,NM_202470,NM_202494	50.78	46.05	43.37	41.54	45.77	66.15	76.99	62.43	64.17	60	GIPC PDZ domain containing family member 1
5770	PTPN1	NM_001278618,NM_002827	51.53	46.03	47.08	49.17	45.3	53.59	48.88	42.36	41.26	42.43	protein tyrosine phosphatase, non-receptor type 1
3376	IARS	NM_002161,NM_013417	48.71	46	40.88	48.37	37.9	58.77	61.31	68.56	67	72.04	isoleucyl-tRNA synthetase
5423	POLB	NM_002690	33.97	45.99	35.31	51.51	32.99	20.68	18.41	22.37	19.53	22.55	DNA polymerase beta
966	CD59	NM_000611,NM_001127223,NM_001127225,NM_001127226,NM_001127227,NM_203329,NM_203330,NM_203331	46.34	45.98	62.27	49.84	61.98	77.4	73.64	68.97	84.23	74.01	CD59 molecule (CD59 blood group)
2697	GJA1	NM_000165	42.64	45.97	56.13	44.85	59.98	0.05	0.03	0	0.02	0.05	gap junction protein alpha 1
51081	MRPS7	NM_015971	41.53	45.9	40.58	47.78	30.09	56.51	55.12	56.67	53.3	56.16	mitochondrial ribosomal protein S7
7392	USF2	NM_001321150,NM_003367,NM_207291	40.61	45.88	50.31	44.42	54.63	47.02	42.56	42.89	41.05	40.73	upstream transcription factor 2, c-fos interacting
79763	ISOC2	NM_001136201,NM_001136202,NM_024710	39.02	45.88	45.4	38.76	39.37	48.45	53.06	46.45	53.51	43.46	isochorismatase domain containing 2
7371	UCK2	NM_012474	54.27	45.86	42.39	41.17	34.51	19.33	18.81	17.48	15.72	17.01	uridine-cytidine kinase 2
1429	CRYZ	NM_001130042,NM_001130043,NM_001134759,NM_001889	35.21	45.85	44.67	48.54	41.96	74.4	69.42	77.83	72.88	74.31	crystallin zeta
10112	KIF20A	NM_005733	78.17	45.84	61.78	42.49	28.57	42	46.17	48.97	46.52	45.01	kinesin family member 20A
26872	STEAP1	NM_012449	21.13	45.84	48.62	58.96	53.16	4.69	4.38	6.62	5.03	6.29	STEAP family member 1
10975	UQCR11	NM_006830	35	45.83	43.07	48.1	41.95	62.74	60.47	64.75	61.31	65.65	ubiquinol-cytochrome c reductase, complex III subunit XI
4832	NME3	NM_002513	27.89	45.79	39.63	38.74	35.92	24.35	26.32	22.95	31.23	23.16	NME/NM23 nucleoside diphosphate kinase 3
100287171	WASHC1	NM_182905	36.73	45.78	38.15	43.26	43.09	36.13	35.83	30.68	31.77	32.11	WASH complex subunit 1
25800	SLC39A6	NM_001099406,NM_012319	49.74	45.76	45	49.64	46.3	13.11	11.4	13.27	13.7	14.55	solute carrier family 39 member 6
53981	CPSF2	NM_001322270,NM_001322271,NM_001322272,NM_017437	38.68	45.74	39.88	48.19	34.65	24.6	24.85	26.28	23.81	26.4	cleavage and polyadenylation specific factor 2
56655	POLE4	NM_019896	30.81	45.7	34.4	49.21	32.9	47.99	51.36	46.25	59.49	46.53	DNA polymerase epsilon 4, accessory subunit
8480	RAE1	NM_001015885,NM_003610	54.83	45.67	42.44	51.04	39.64	51.77	50.15	47.82	46.64	44.46	ribonucleic acid export 1
644	BLVRA	NM_000712,NM_001253823	34.42	45.66	48.1	44.78	41.96	67.75	57.57	75.83	60.81	68.14	biliverdin reductase A
201799	TMEM154	NM_152680	50.3	45.63	64.2	42.98	76.12	4.88	3.59	5.3	3.71	6.15	transmembrane protein 154
837	CASP4	NM_001225,NM_033306	35.13	45.59	41.28	55.85	50.33	51.89	59.21	58.15	66.97	64.2	caspase 4
374291	NDUFS7	NM_024407	32.18	45.58	40.29	45.86	40.51	45.87	50.06	52.18	51.84	48.76	NADH:ubiquinone oxidoreductase core subunit S7
58506	SCAF1	NM_021228	34.87	45.58	41.42	45.88	43.59	30.7	32.36	31.84	30.68	33.18	SR-related CTD associated factor 1
55173	MRPS10	NM_018141	41.06	45.55	41	48.43	40.94	46.4	49.31	53.48	50.71	52.05	mitochondrial ribosomal protein S10
64087	MCCC2	NM_022132	43.47	45.53	40.72	50.63	33.53	57.81	64.03	62.35	69.99	63.49	methylcrotonoyl-CoA carboxylase 2
84993	UBL7	NM_001286739,NM_001286740,NM_001286741,NM_001286742,NM_032907,NM_201265	43.26	45.47	37.59	47.18	35.63	40.11	41.24	40.67	47.18	42.35	ubiquitin like 7
9380	GRHPR	NM_012203	41.1	45.46	42.99	41.69	37.61	64.91	69.51	61.38	78.97	61.94	glyoxylate and hydroxypyruvate reductase
8189	SYMPK	NM_004819	34.97	45.44	42.39	43.98	43.17	17.28	20.95	19.48	21.02	19.64	symplekin
5437	POLR2H	NM_001278698,NM_001278699,NM_001278700,NM_001278714,NM_001278715,NM_001346879,NM_006232	46.2	45.44	40.21	42.3	36.09	44.16	42.1	37.23	39.21	34.29	RNA polymerase II subunit H
25983	NGDN	NM_001042635,NM_015514	49.38	45.42	46.15	45.89	45.47	27.57	23.35	25.49	19.25	23.22	neuroguidin
7477	WNT7B	NM_058238	65.47	45.39	45.37	10.97	33.88	39.09	34.4	29.04	25.63	27.31	Wnt family member 7B
9978	RBX1	NM_014248	37.21	45.34	45.28	51.18	42.66	37.7	30.9	35.1	32.69	31.87	ring-box 1
22949	PTGR1	NM_001146108,NM_001146109,NM_012212	43.42	45.31	38.23	57	38.17	29.37	36.1	36.57	45.71	39.14	prostaglandin reductase 1
80023	NRSN2	NM_001323679,NM_001323680,NM_001323681,NM_001323682,NM_001323683,NM_001323684,NM_001323685,NM_024958	23.75	45.26	34.99	47.52	36.97	0.41	0.19	0.23	0.33	0.42	neurensin 2
8882	ZPR1	NM_001317086,NM_003904	53.18	45.25	49.29	49.01	49.84	52.39	46.8	55.47	52.6	55.59	ZPR1 zinc finger
113829	SLC35A4	NM_080670	43.94	45.11	55.86	48.29	56.72	52.38	43.32	46.68	34.6	44.8	solute carrier family 35 member A4
1615	DARS	NM_001293312,NM_001349	43.17	45.07	43.13	42.4	37.78	31.61	33.85	30.68	33.66	31.14	aspartyl-tRNA synthetase
8394	PIP5K1A	NM_001135636,NM_001135637,NM_001135638,NM_001330689,NM_003557	54.99	45.06	41.74	44.27	46.52	29.71	24.44	22.57	20.86	21.94	phosphatidylinositol-4-phosphate 5-kinase type 1 alpha
84337	ELOF1	NM_032377	40.69	45.06	40.88	41.71	39.75	44.44	36.68	43.46	42.45	43.46	elongation factor 1 homolog
5899	RALB	NM_002881	39.76	45.06	43.64	48.49	41.96	112.07	109.4	125.72	94.62	109.72	RAS like proto-oncogene B
57648	KIAA1522	NM_001198972,NM_001198973,NM_020888	35.53	45.01	30.47	48.71	26.89	28.88	38.43	35.72	33.53	29.61	KIAA1522
3835	KIF22	NM_001256269,NM_001256270,NM_007317	48.33	45	46.06	41.68	37.08	48.46	53.31	55.79	52.45	52.25	kinesin family member 22
3038	HAS3	NM_001199280,NM_005329,NM_138612	39.73	44.98	39.09	45.54	33.81	53.61	40.34	43.24	44.1	44.95	hyaluronan synthase 3
2314	FLII	NM_001256264,NM_001256265,NM_002018	49.78	44.92	42.74	43.36	37.77	37.13	43.14	39.32	45.67	41.49	FLII, actin remodeling protein
115106	HAUS1	NM_138443	34.61	44.9	36.31	53.96	24.97	21.76	26.53	26.33	28.22	29.62	HAUS augmin like complex subunit 1
51528	JKAMP	NM_001098625,NM_001284201,NM_001284202,NM_001284203,NM_001284204,NM_016475	49.67	44.88	44.45	52.45	49.94	25.58	20.89	24.97	20.81	26.77	JNK1/MAPK8 associated membrane protein
56954	NIT2	NM_020202	39.62	44.87	37.54	48.53	31.47	45.89	46.43	47.98	54.8	51.98	nitrilase family member 2
11273	ATXN2L	NM_001308230,NM_007245,NM_017492,NM_145714,NM_148414,NM_148415,NM_148416	42.35	44.84	37.97	37.96	45.01	58.27	58.57	49.36	48.03	52	ataxin 2 like
643155	SMIM15	NM_001048249	55.04	44.83	46.09	49.34	47.3	35.91	35.18	36.17	36.51	36.23	small integral membrane protein 15
63940	GPSM3	NM_001276501,NM_022107	32.29	44.83	52.14	43.16	57.54	5.4	8.75	4.39	7.57	5.68	G protein signaling modulator 3
10459	MAD2L2	NM_001127325,NM_006341	39.73	44.82	40.73	49.64	36.75	56.66	53.2	65.11	58.07	65.66	mitotic arrest deficient 2 like 2
25847	ANAPC13	NM_001242374,NM_001242375,NM_015391	44.26	44.82	53.51	54.16	65.66	56.27	43.77	53.3	41.3	58.24	anaphase promoting complex subunit 13
51441	YTHDF2	NM_001172828,NM_001173128,NM_016258	53.23	44.78	50.71	45.23	52.25	25.27	21.18	21.91	21.98	19.79	YTH N6-methyladenosine RNA binding protein 2
6659	SOX4	NM_003107	44.47	44.75	75.54	37.35	90.97	9.48	5.98	5.73	3.89	5.75	SRY-box 4
1267	CNP	NM_001330216,NM_033133	33.83	44.7	44.18	47.69	50.83	18.39	19.91	20.19	20.23	20.59	2',3'-cyclic nucleotide 3' phosphodiesterase
7791	ZYX	NM_001010972,NM_003461	46.72	44.69	45.24	42.83	52.72	71.7	70.97	65.55	67.94	71.14	zyxin
3156	HMGCR	NM_000859,NM_001130996	46.12	44.69	35.97	46.14	26.57	43.92	40.9	39.89	34.72	34.14	3-hydroxy-3-methylglutaryl-CoA reductase
7347	UCHL3	NM_001270952,NM_006002	48.43	44.67	40.72	50.81	34.73	60.58	60.28	66.53	73.91	64.02	ubiquitin C-terminal hydrolase L3
79102	RNF26	NM_032015	52.99	44.66	54.94	36.62	47.42	64.05	60.03	55.91	38.89	51.44	ring finger protein 26
3799	KIF5B	NM_004521	59.78	44.62	46.88	44.32	43.22	55.68	47.09	52.25	43.56	51.41	kinesin family member 5B
30844	EHD4	NM_139265	39.28	44.58	48.48	36.05	51.27	29.66	28.63	22.76	24.63	21.85	EH domain containing 4
8562	DENR	NM_003677	54.33	44.57	45.5	43.71	44.7	41.55	37.89	35.55	36.76	35.58	density regulated re-initiation and release factor
387914	SHISA2	NM_001007538	37.92	44.54	51.31	39.61	74.56	159.49	121.67	122.06	88.55	120.83	shisa family member 2
5928	RBBP4	NM_001135255,NM_001135256,NM_005610	40.48	44.53	44.99	51.3	42.05	39.43	41.51	40.58	45.16	40.93	RB binding protein 4, chromatin remodeling factor
29117	BRD7	NM_001173984,NM_013263	52.3	44.52	46.16	41.73	43.5	45.85	48.11	44.99	41.29	43.22	bromodomain containing 7
5977	DPF2	NM_001330308,NM_006268	37.67	44.49	47.06	48.47	50.72	37.9	38.92	40.78	38.45	43.03	double PHD fingers 2
23559	WBP1	NM_012477	24.06	44.47	43.98	49.88	53	36.89	31.79	36.34	36.93	40.8	WW domain binding protein 1
10484	SEC23A	NM_006364	47.16	44.45	43.65	50.06	40.96	29.36	28.04	32.53	31.79	33.22	Sec23 homolog A, coat complex II component
55568	GALNT10	NM_198321	51.05	44.44	49.53	36.06	34.29	49.62	50.5	40.14	42.16	38.49	polypeptide N-acetylgalactosaminyltransferase 10
6449	SGTA	NM_003021	49.27	44.42	39.56	41.8	42.24	68.17	65.57	58.91	56.47	61.14	small glutamine rich tetratricopeptide repeat containing alpha
10449	ACAA2	NM_006111	42.08	44.4	40.09	48.71	38.72	30.6	32.28	34.34	37.85	39.54	acetyl-CoA acyltransferase 2
902	CCNH	NM_001199189,NM_001239	49.5	44.37	45.44	46.85	39.81	40.96	28.92	36.85	32.11	41.09	cyclin H
10682	EBP	NM_006579	43.69	44.34	38.21	49	28.68	74.89	85.27	77.04	99.52	73.27	emopamil binding protein (sterol isomerase)
102	ADAM10	NM_001110,NM_001320570	50.01	44.33	48.94	39.06	53.06	29.38	26.85	26.71	24.15	26.16	ADAM metallopeptidase domain 10
23326	USP22	NM_015276	38.55	44.32	40.83	42.25	37.49	47.41	47.14	45.37	40.45	43.65	ubiquitin specific peptidase 22
54927	CHCHD3	NM_001317177,NM_001317178,NM_017812	61.19	44.32	47	44.67	41.04	82.12	73.43	76.56	61.51	74.96	coiled-coil-helix-coiled-coil-helix domain containing 3
90135	BTBD6	NM_033271	36.54	44.3	40.63	43.4	41.76	27.64	26.21	28.01	28.22	27.25	BTB domain containing 6
23231	SEL1L3	NM_001297592,NM_001297594,NM_015187	31.29	44.29	46.18	45.93	48.26	12.17	11.26	15.83	12.82	15.34	SEL1L family member 3
9274	BCL7C	NM_001286526,NM_004765	35.88	44.29	35.53	46.9	33.96	46.23	69.7	57.87	73.76	55.14	BCL tumor suppressor 7C
79064	TMEM223	NM_001080501	29.78	44.27	36.14	45.85	36.79	25.5	30.41	32.09	33.01	29.96	transmembrane protein 223
2010	EMD	NM_000117	42.64	44.25	37.72	47.44	32.03	57.89	54.31	53.58	63.02	56.08	emerin
9097	USP14	NM_001037334,NM_005151	51.59	44.19	38.37	46.27	34.38	56.29	54.37	56.51	59.98	54.27	ubiquitin specific peptidase 14
6949	TCOF1	NM_000356,NM_001008657,NM_001135243,NM_001135244,NM_001135245,NM_001195141	47.66	44.13	33.6	42.22	24.15	41.85	47.08	44.72	43.09	43.71	treacle ribosome biogenesis factor 1
1545	CYP1B1	NM_000104	40.02	44.07	49.04	44.42	79.04	6.68	10.17	7.81	12.08	8.79	cytochrome P450 family 1 subfamily B member 1
3611	ILK	NM_001014794,NM_001014795,NM_001278441,NM_001278442,NM_004517	40.39	44.02	46.45	46.74	45	73.45	86.29	81.94	92.02	82.56	integrin linked kinase
1967	EIF2B1	NM_001414	47.2	44	43.38	50.54	38.24	39.2	40.49	37.34	44.41	40.32	eukaryotic translation initiation factor 2B subunit alpha
10527	IPO7	NM_006391	52.87	44	36.81	42.74	31.21	68.58	73.11	63.59	65.15	63.77	importin 7
84823	LMNB2	NM_032737	50.02	44	39.3	39.3	28.27	60.48	66.16	59.89	61.7	55.41	lamin B2
5985	RFC5	NM_001130112,NM_001130113,NM_001206801,NM_001346815,NM_007370,NM_181578	37.62	43.98	34.78	52.97	24.58	25.07	26.83	27.14	31.7	29.71	replication factor C subunit 5
3098	HK1	NM_000188,NM_001322364,NM_001322365,NM_001322366,NM_001322367,NM_001358263,NM_033496,NM_033497,NM_033498,NM_033500	32.5	43.93	35.31	46.97	33.65	55.74	49.55	55.44	51.32	55.74	hexokinase 1
4905	NSF	NM_006178	44.69	43.91	43.81	48.77	40.73	32.64	28.73	32.89	28.08	32.44	N-ethylmaleimide sensitive factor, vesicle fusing ATPase
51729	WBP11	NM_016312	46.01	43.86	42.01	43.02	39.26	72.07	70.96	69.63	66.31	69.71	WW domain binding protein 11
[truncated: 14,989 more rows]

## Sheet: Figure 1E RNAseq full dataset
gene_id	transcript_id	chr	start	end	strand	Ter 0hr-1	Ter 0hr-2	Ter 12hr-1	Ter 12hr-2	Ter 24hr-1	Ter 24hr-2	Ter 48hr-1	Ter 48hr-2	Ter 72-1	Ter 72-2	DMSO 72hr-1	DMSO 72hr-2
A1BG	NM_130786	chr19	58858172	58864865	-	2.05087	2.05753	2.33219	1.83814	2.12817	2.32218	2.39035	2.50579	1.78412	2.44526	1.60301	1.32959
A1BG-AS1	NR_015380	chr19	58863336	58866549	+	0.757924	0.98511	1.10175	0.68085	0.793748	0.688627	0.850651	0.894007	1.21243	1.03593	0.770785	0.605104
A1CF	NM_001198818	chr10	52559169	52645435	-	0.000226855	0	0	0.000237132	0.00025787	0	0.000243773	0	0	0	0.000262372	0
A1CF	NM_001198819	chr10	52559169	52645435	-	1.8315e-06	0	0	1.9393e-06	2.1396e-06	0	2.077e-06	0	0	0	4.136e-07	0
A1CF	NM_001198820	chr10	52559169	52645435	-	5.31064e-05	0	0	5.57301e-05	6.08691e-05	0	5.80064e-05	0	0	0	3.75487e-05	0
A1CF	NM_014576	chr10	52559169	52645435	-	0.00345041	0	0	0.00358011	0.00386119	0	0.00359507	0	0	0	0.0100375	0
A1CF	NM_138932	chr10	52559169	52645435	-	0.00170471	0	0	0.0017722	0.00191545	0	0.00179049	0	0	0	0.00390521	0
A1CF	NM_138933	chr10	52559169	52645435	-	0.000214022	0	0	0.000223753	0.000243363	0	0.000230134	0	0	0	0.000242693	0
A2M	NM_000014	chr12	9220304	9268558	-	0.217963	0.326862	0.0723898	0.083499	0.18034	0.140297	0.793658	1.17689	0.602938	0.704664	0.0146985	0.0442417
A2M-AS1	NR_026971	chr12	9217773	9220651	+	0	0	0	0.0264668	0	0	0.080004	0.0496515	0.0785584	0.0503423	0.0325705	0
A2ML1	NM_144670	chr12	8975150	9029381	+	0	0	0	0	0	9.022e-07	0	0	0	0	0	0
A2ML1	NR_046256	chr12	8997600	9029381	+	0	0	0	0	0	0.0133582	0	0	0	0	0	0
A2MP1	NR_040112	chr12	9381129	9386803	-	0	0	0	0	0	0	0	0	0	0	0	0
A4GALT	NM_017436	chr22	43088127	43116876	-	1.03929	1.11308	1.09537	1.02751	1.46887	1.27892	1.51095	1.58873	1.64832	2.00692	0.956793	0.9512
A4GNT	NM_016161	chr3	137842560	137851229	-	0	0	0	0.0666337	0	0	0	0	0	0	0	0
AA06	NR_037584	chr17	31856806	31860779	-	0	0	0	0	0	0	0	0	0	0	0	0
AAAS	NM_001173466	chr12	53701240	53715412	-	2.82158	3.34415	5.64928	3.52193	3.70186	3.76885	3.18769	2.19636	1.29406	3.54719	4.91417	2.97296
AAAS	NM_015665	chr12	53701240	53715412	-	27.8824	25.5651	27.3745	28.1131	28.4333	30.0159	19.4075	18.692	27.6403	26.7419	28.52	30.8132
AACS	NM_023928	chr12	125549925	125627871	+	15.3219	15.7798	14.101	13.9587	12.8011	12.6519	15.779	15.0514	13.4063	13.8568	12.7011	13.5493
AACSP1	NR_024035	chr5	178191864	178203277	-	0.40925	0.390838	0.296498	0.293163	0.517849	0.529522	0.375951	0.474965	0.316416	0.405535	0.590345	0.444143
AADAC	NM_001086	chr3	151531861	151546276	+	0	0	0	0	0	0.0669774	0.0747938	0	0	0	0.0456473	0.0343379
AADACL2	NM_207365	chr3	151451704	151475556	+	0	0	0	0	0	0.0361322	0	0	0	0	0	0
AADACL3	NM_001103169	chr1	12776118	12788726	+	0	0	0	0	0	0	0	0	0	0	0	0
AADACL3	NM_001103170	chr1	12776118	12788726	+	0	0	0	0	0	0	0	0	0	0	0	0
AADACL4	NM_001013630	chr1	12704566	12727097	+	0	0	0	0	0	0	0	0	0	0	0	0
AADAT	NM_016228	chr4	170981373	171011183	-	4.11186	2.87799	4.29989	3.72135	4.05285	4.13866	2.44876	1.83161	4.00285	3.82745	3.43678	3.17977
AADAT	NM_182662	chr4	170981373	171011372	-	0.529856	0.784864	0.371293	0.4334	0.517517	2.48636e-05	0.162994	0.391834	0.617685	0.616308	0.957418	0.748236
AAED1	NM_153698	chr9	99403533	99417599	-	8.2533	10.0471	12.093	11.3024	11.9209	11.5411	9.49938	7.88108	8.73649	8.37215	9.47995	9.22708
AAGAB	NM_001271885	chr15	67493013	67547536	-	0.915129	4.41773	1.06264	2.46828	3.30496	0.00098632	2.67947	0.00808404	0.0150138	1.77403	3.22478	3.20456
AAGAB	NM_001271886	chr15	67493013	67547074	-	1.8848	1.10347	2.07672	1.90466	1.99071	1.65601	1.67811	1.83758	1.74965	2.07087	1.30951	2.1541
AAGAB	NM_024666	chr15	67493013	67547074	-	16.2856	11.9573	16.4304	14.8254	14.8705	16.3841	12.8065	14.7989	16.762	15.3574	14.2344	14.2961
AAK1	NM_014911	chr2	69685127	69870977	-	0.498541	0.540521	0.492853	0.400968	0.511235	0.503403	0.563018	0.704257	0.596767	0.635492	0.521101	0.522893
AAMDC	NM_024684	chr11	77532208	77583398	+	9.93704	7.92955	7.4753	8.49738	10.1572	10.3522	9.31288	9.00917	7.12904	9.5681	7.84769	7.0445
AAMP	NM_001087	chr2	219128852	219134893	-	70.5964	76.1226	80.6399	80.6227	71.7983	67.8038	49.8962	44.1749	61.3159	61.2471	74.3794	77.6369
AANAT	NM_001088	chr17	74463630	74466199	+	0.0593063	0	0	0	0	0.0558438	0	0.00226073	0.0917751	0.0019285	0	0
AANAT	NM_001166579	chr17	74449433	74466199	+	4.016e-07	0.0299205	0	0	0	4.255e-07	0	0.0562813	8.641e-07	0.0572424	0	0
AAR2	NM_001271874	chr20	34824339	34844863	+	20.2589	18.2273	17.9972	17.1922	19.6795	20.7479	18.9177	19.3173	18.4556	18.7886	16.8729	20.4188
AAR2	NM_015511	chr20	34824339	34844863	+	1.72111	2.55062	1.88035	3.69372	1.43302	2.36558	3.19263	2.69106	2.01555	2.32435	3.08175	2.74475
AARD	NM_001025357	chr8	117950464	117956239	+	2.05736	1.67739	2.37021	1.25433	1.24692	1.69791	1.09733	0.95907	0.979005	1.2233	2.02988	1.37434
AARS	NM_001605	chr16	70286297	70323412	-	74.2608	82.9249	83.4322	78.0783	87.5419	81.3927	71.7735	76.2319	74.9036	79.2216	80.5095	79.8975
AARS2	NM_020745	chr6	44266463	44281063	-	7.66131	8.17043	10.8836	10.9111	12.6345	11.9074	9.08264	9.13071	9.51583	9.91055	8.90164	9.42937
AARSD1	NM_001261434	chr17	41102543	41116515	-	20.6348	24.2836	25.8786	26.2191	25.9146	23.8354	16.7693	17.4989	20.3311	22.256	27.4891	25.7411
AASDH	NM_181806	chr4	57204457	57253638	-	4.31803	4.16391	3.619	3.38896	3.9487	4.04824	4.52816	4.72259	4.66116	4.38334	4.01919	4.13458
AASDHPPT	NM_015423	chr11	105948292	105969419	+	20.4261	19.9819	20.9633	22.8908	22.6139	24.0459	19.5886	19.5504	23.9142	20.9949	22.0261	23.0472
AASS	NM_005763	chr7	121713598	121784344	-	6.92353	6.44254	6.51034	6.61486	6.44465	8.04151	6.28122	6.75549	6.73938	6.02753	6.88654	6.63549
AATF	NM_012138	chr17	35306175	35414171	+	60.116	60.8436	74.6117	72.0394	70.4263	65.1057	46.6076	45.5193	59.1196	53.8789	69.5522	70.8558
AATK	NM_001080395	chr17	79091096	79139872	-	4.99704e-05	5.12001e-05	3.5601e-05	5.18801e-05	5.73998e-05	4.8251e-05	5.27856e-05	2.85954e-05	7.89596e-05	5.11449e-05	6.52969e-05	3.89294e-05
AATK	NM_004920	chr17	79091096	79105748	-	0.125441	0.116998	0.0659449	0.0760532	0.140838	0.137682	0.241087	0.183886	0.242403	0.144998	0.187512	0.0604538
AATK-AS1	NR_027255	chr17	79139307	79156964	+	0.0363075	0	0	0	0	0	0	0	0.16847	0	0	0.0700795
ABAT	NM_000663	chr16	8806826	8878432	+	0	0	0	0	0	0	0	0	0	0	0	0
ABAT	NM_001127448	chr16	8814573	8878432	+	2.47343e-05	0.00027569	0.000282368	7.34054e-05	3.40149e-05	3.71376e-05	4.18978e-05	9.9447e-06	0.000110212	3.70002e-05	0.000343457	0.00025972
ABAT	NM_020686	chr16	8768444	8878432	+	0.509435	0.518129	0.686902	0.610244	0.659053	0.666776	1.12603	0.952234	0.941507	0.9875	0.382783	0.341429
ABCA1	NM_005502	chr9	107543284	107690527	-	4.00891	4.19919	1.708	1.55912	3.08824	3.10022	7.33832	8.94828	3.90347	4.60621	1.73075	1.63891
ABCA10	NM_080282	chr17	67144148	67240956	-	1.78782	1.65737	1.11537	0.981172	1.39724	1.71324	4.50847	4.8646	2.53105	2.63197	1.11305	0.950346
ABCA11P	NR_002451	chr4	419224	467998	-	3.71515	3.68934	3.93814	3.39808	4.02284	4.18244	3.83018	3.69067	3.46041	3.68227	3.89928	4.08572
ABCA12	NM_015657	chr2	215796266	215896810	-	0	2.71e-08	0.0205092	0.00675576	6.5319e-06	3.01e-06	3.71692e-05	5.9854e-06	0.0634919	4.1609e-06	0.016663	0
ABCA12	NM_173076	chr2	215796266	216003151	-	0	0.0176004	3.8974e-06	4.0172e-06	0.0970776	0.119358	0.803587	1.17203	0.0774394	0.159989	4.5429e-06	0
ABCA13	NM_152701	chr7	48211057	48687091	+	0.0969451	0.113993	0.0763779	0.103827	0.163124	0.170975	0.266509	0.227882	0.16388	0.192074	0.0620792	0.0875983
ABCA17P	NR_003574	chr16	2390923	2476700	+	0.0511793	0.0130213	0.0269179	0.0798404	0.0143694	0.0481483	0.013414	0.0875106	0.0988965	0.0507063	0.0491845	0.0493467
ABCA2	NM_001606	chr9	139901686	139922740	-	0.0682393	1.53484	1.46324	1.1861	1.41837	1.40133	1.4322	1.54988	1.0013	0.779712	1.08217	0.938681
ABCA2	NM_212533	chr9	139901686	139923374	-	1.12615	0.00045992	0.000980615	0.000140318	0.000348004	0.000220323	0.000382145	0.000262815	0.21521	0.428413	0.000165927	0.000170823
ABCA3	NM_001089	chr16	2325879	2390747	-	0.127633	0.170422	0.100626	0.0331617	0.0805828	0.0675357	0.217325	0.171456	0.036991	0.165961	0.0715328	0.0615201
ABCA4	NM_000350	chr1	94458394	94586705	-	0.00719594	0	0.0075635	0.00747774	0	0	0.015079	0.00703019	0.0111227	0.0142579	0.00921791	0
ABCA5	NM_018672	chr17	67240576	67311774	-	0.174861	0.250905	0.130635	0.30115	0.102301	0.171818	0.143347	0.0775625	0.185571	0.243076	0.185867	0.25533
ABCA5	NM_172232	chr17	67240576	67323323	-	0.451356	0.284722	0.608936	0.453801	0.872825	0.773203	0.841453	0.860851	0.71414	0.527256	0.407165	0.491701
ABCA6	NM_080284	chr17	67074847	67138015	-	0.120439	0.0816972	0.063321	0.020868	0.191557	0.122742	0.452321	0.500106	0.325804	0.298305	0.0514348	0.0580572
ABCA7	NM_019112	chr19	1040102	1065570	+	0.387179	0.409638	0.415127	0.418469	0.46064	0.444341	0.730241	0.98349	0.574528	0.598379	0.36703	0.276199
ABCA8	NM_007168	chr17	66863431	66951533	-	0.0556305	0.0188667	0.0194964	0.00963776	0.052042	0.0261662	0.126317	0.12682	0.157651	0.128599	0	0.00893854
ABCA9	NM_080283	chr17	66970773	67057136	-	0	0.00854087	0.0088254	0	0	0.00789725	0.0175942	0	0.0129766	0.00831705	0.0107547	0.0161862
ABCB1	NM_000927	chr7	87133179	87342639	-	1.15395	1.24332	2.01076	2.23504	2.66768	2.99599	2.02785	2.36547	3.30531	3.50826	1.86989	1.71248
ABCB10	NM_012089	chr1	229652329	229694442	-	14.9428	16.1024	18.0087	17.3702	14.7956	13.5598	8.4624	7.88595	10.4081	9.83313	16.1475	15.6584
ABCB11	NM_003742	chr2	169779449	169887833	-	0	0	0	0	0	0.010507	0.0117071	0.0218247	0	0	0	0
ABCB4	NM_000443	chr7	87031361	87105019	-	6.44485e-05	9.67134e-05	6.71146e-05	6.79886e-05	7.56968e-05	1.82542e-05	0.335745	6.49061e-05	0.000102211	6.69739e-05	6.35e-07	6.32471e-05
ABCB4	NM_018849	chr7	87031361	87105019	-	2.13442e-05	0	2.21947e-05	2.25619e-05	2.29972e-05	4.71e-08	0.00399562	1.9216e-05	3.0709e-05	1.92434e-05	0.172468	2.13627e-05
ABCB4	NM_018850	chr7	87031361	87105019	-	0.126423	0.185892	0.13301	0.131504	0.268313	0.297538	0.000904032	0.274613	0.39102	0.348092	4.44624e-05	0.108346
ABCB5	NM_001163941	chr7	20655245	20796637	+	0	1.7291e-06	0	0	2.2991e-06	1.6153e-06	0	0.00960964	0	2.0546e-06	2.6569e-06	0
ABCB5	NM_001163942	chr7	20686966	20700017	+	0	0	0	0	0	0	0	0.024113	0	0	0	0
ABCB5	NM_001163993	chr7	20686966	20707187	+	0	0	0	0	0	0	0	0	0	0	0	0
ABCB5	NM_178559	chr7	20686966	20796637	+	0	0.024885	0	0	0.0137287	0.0230048	0	0	0	0.012112	0.0156644	0
ABCB6	NM_005689	chr2	220074488	220083712	-	13.2489	12.1674	20.7211	19.9807	23.923	23.4725	15.8457	15.5887	15.8574	17.7889	14.0472	12.6555
ABCB7	NM_001271696	chrX	74273007	74376175	-	4.31011	4.3506	4.88828	4.67602	4.52638	5.48194	5.89554	5.28198	3.74518	3.63811	5.6479	4.69245
ABCB7	NM_001271697	chrX	74273007	74376175	-	0.00831345	2.00883e-05	0.0767348	0.0095941	0.430915	0.000141108	0.122837	3.61024e-05	0.499946	5.8003e-06	0.108124	0.0100986
ABCB7	NM_001271698	chrX	74273007	74376175	-	0.465737	0.741171	0.316598	0.806475	0.658209	0.085754	0.34506	0.0945037	0.205632	1e-10	4.86497e-05	0.38313
ABCB7	NM_001271699	chrX	74273007	74376175	-	0.219934	2.5103e-05	0.0699014	0.361291	0.549859	6.18757e-05	2.40398e-05	5.52708e-05	0.0112084	3.79557e-05	0.0685571	0.315803
ABCB7	NM_004299	chrX	74273007	74376175	-	5.16419	5.17216	4.59206	3.87036	5.60138	5.96386	5.78213	7.45008	6.23677	6.75414	3.81106	4.11626
ABCB8	NM_007188	chr7	150725510	150744869	+	3.96571	4.17464	4.63815	4.25388	5.29753	5.33883	4.6109	5.17739	4.47444	4.57254	3.56265	3.83449
ABCB9	NM_001243013	chr12	123413539	123451056	-	1.13483	1.2156	0.84143	0.728395	2.32481	2.2501	1.56255	2.62112	1.68323	1.60545	0.569894	1.09115
ABCB9	NM_001243014	chr12	123405498	123451056	-	0.657345	0.59	0.147561	0.388217	0.415961	0.358646	0.328844	0.638201	0.473249	0.0972587	0.00311106	0.993572
ABCB9	NM_019624	chr12	123413539	123451056	-	3.60747e-05	4.85788e-05	0.333029	0.589241	0.291719	0.97368	0.673382	0.514909	0.145022	0.262969	0.276163	0.254208
ABCB9	NM_019625	chr12	123413539	123451056	-	4.26144	3.63513	6.37989	5.92781	9.30924	7.7777	11.5435	9.3926	9.03721	10.4987	4.33749	3.25696
ABCB9	NM_203444	chr12	123409072	123451056	-	0.147529	0.424255	1.5811e-06	3.0157e-06	0.340379	0.209207	0.236305	0.256713	0	0.142307	0.307385	1.0101e-06
ABCC1	NM_004996	chr16	16043434	16236930	+	4.14667	4.8575	4.64678	4.47696	5.23275	4.52183	5.24783	5.92345	4.38093	4.88984	4.14652	4.01298
ABCC10	NM_001198934	chr6	43395292	43418163	+	1.82611	2.29654	2.1082	1.91029	2.49662	2.12168	2.72385	2.96617	2.09691	2.52533	1.35606	1.65448
ABCC10	NM_033450	chr6	43399489	43418163	+	0.277623	0.179355	0.480314	0.200924	8.056e-06	0.393655	0.0939956	0.146034	0.66116	0.230852	0.751057	0.120356
ABCC11	NM_032583	chr16	48200822	48269088	-	0.000172698	0.000177065	0.00017862	0.000179264	0.000191037	0.000158669	0.000180716	0.000166572	0	0.000169655	0.000222356	0.000160714
ABCC11	NM_033151	chr16	48200822	48266182	-	0	7.1e-09	1.3e-09	7.1e-09	7.3e-09	6e-09	7.1e-09	2e-10	0	6.6e-09	8.9e-09	4e-10
ABCC11	NM_145186	chr16	48200822	48269088	-	0.0118033	0.0120102	0.0250188	0.0122745	0.0132576	0.011108	0.0123737	0.0466522	0	0.0116956	0.0151226	0.0344888
ABCC12	NM_033226	chr16	48116884	48180681	-	0	0	0	0	0	0.0096829	0	0.0100565	0.0159108	0	0	0
ABCC13	NR_003087	chr21	15646120	15673692	+	0	0	0	0	0	0	0	0	0	0	0	0
ABCC13	NR_003088	chr21	15646120	15663706	+	0	0	0	0	0	0	0	0	0	0	0	0
ABCC2	NM_000392	chr10	101542463	101611662	+	7.48267	7.08837	5.71857	5.24842	7.77412	7.30691	9.40034	11.1722	6.74456	7.11052	6.60281	6.28949
ABCC3	NM_001144070	chr17	48712218	48745288	+	0.1723	0.268347	0.328073	0.432528	0.00023372	1.2438e-06	0.119342	0.0899141	0.134973	0.115869	0.288137	0.102072
ABCC3	NM_003786	chr17	48712218	48769063	+	2.35005	2.21255	2.32334	1.88514	2.19647	1.94704	3.4988	4.14409	2.53202	2.22477	1.52335	1.54326
ABCC4	NM_001105515	chr13	95748025	95953687	-	1.20324	1.82425	1.69125	0.845023	0.825775	1.03056	0.868156	0.846505	1.24699	1.5099	1.23624	1.98012
ABCC4	NM_005845	chr13	95672083	95953687	-	6.10674	6.48226	6.68995	6.91383	6.55372	6.23176	4.58549	5.46988	5.6866	5.39336	7.21274	6.90256
ABCC5	NM_001023587	chr3	183701541	183735727	-	1.21742	1.09348	1.33666	1.42685	1.35617	1.46446	0.872764	1.05959	0.797605	1.13893	1.09756	1.66234
ABCC5	NM_005688	chr3	183637724	183735727	-	1.92422	2.0969	3.11238	2.74188	3.47801	3.22726	3.82848	4.12837	3.51718	3.53657	1.86937	1.76055
ABCC5-AS1	NR_046570	chr3	183724126	183729207	+	0	0	0	0	0	0	0	0	0.255791	0.163705	0	0.159953
ABCC6	NM_001079528	chr16	16315044	16317328	-	0.0918206	0.0131545	0	0.0483038	0.312287	0.0865139	0.284637	0.619691	0.0710969	0.318728	0	0.207217
ABCC6	NM_001171	chr16	16243422	16317328	-	0.0311963	0.0355526	0.0109348	1.21e-08	0.0700508	0.0293474	0.0207324	0.0721726	0	0.0257559	0	0
ABCC6P1	NR_003569	chr16	18582570	18609607	+	0.0803583	0.122738	0.105771	0.0732046	0	0.0378049	0.0386442	0.157055	0	0.0298587	0.0515039	0.0839617
ABCC6P2	NR_023387	chr16	14916289	14918559	-	0.187649	0	0	0.296237	0.106393	0.176811	0.562418	0.550939	0.217956	0.232638	0	0.121004
ABCC8	NM_000352	chr11	17414432	17498449	-	0	0	0	0	0	0.0100645	0.0224273	0	0	0	0	0
ABCC9	NM_005691	chr12	21958108	22089628	-	0	0	0	4e-10	0	7e-10	2e-10	4.7e-09	3.3e-09	8e-10	0	3e-10
ABCC9	NM_020297	chr12	21950324	22089628	-	0.664107	0.745239	0.627473	0.758711	0.857599	0.997159	0.956998	1.32053	1.09173	1.06065	0.82729	0.74615
ABCD1	NM_000033	chrX	152990323	153010216	+	5.19126	5.13422	4.93609	5.47696	7.38427	7.2499	7.21703	7.44342	6.1839	6.29449	4.25915	4.1691
ABCD2	NM_005164	chr12	39945022	40013843	-	0.079596	0.0202469	0.0418471	0.0310299	0.0223403	0.0467988	0.0729939	0.0583252	0.076899	0.049286	0.0637352	0.0287765
ABCD3	NM_001122674	chr1	94883933	94944260	+	11.3955	10.3404	9.80292	9.01757	11.2322	9.19452	8.52397	7.32974	10.3283	8.29764	11.1664	10.6555
ABCD3	NM_002858	chr1	94883933	94984219	+	11.2555	11.0167	13.0464	13.8785	13.4789	15.7185	13.6015	13.4648	12.8185	12.0612	13.1535	12.9634
ABCD4	NM_005050	chr14	74751980	74769767	-	2.26872	1.58431	2.69589	2.37016	1.81512	2.28729	2.59638	2.20272	2.97469	2.19227	2.04231	1.42626
ABCD4	NR_003256	chr14	74751980	74769767	-	0.000486879	1.45288	0.000171028	0.028314	1.23155	1.15871	0.000146431	0.348686	0.00208661	0.894793	0.90464	1.10774
ABCE1	NM_001040876	chr4	146019156	146050676	+	2.70502	3.14769	3.35917	2.89738	1.92134	2.71291	2.17836	1.79501	2.65447	3.0625	2.85857	3.60354
ABCE1	NM_002940	chr4	146019156	146050676	+	41.3863	39.826	42.6985	44.6188	38.2831	36.9043	31.6833	31.9851	35.8796	33.2422	46.3368	47.1753
ABCF1	NM_001025091	chr6_mann_hap4	1887242	1907381	+	0	0	0	0	0	0	0	0	0	0	0	0
ABCF1	NM_001025091_1	chr6	30539170	30559309	+	35.9877	38.1723	39.2884	39.1778	39.098	39.9824	32.0557	32.9709	34.67	31.8235	36.8948	36.6833
ABCF1	NM_001025091_2	chr6_dbb_hap3	1832805	1852944	+	0	0	0	0	0	0	0	0	0	0	0	0
ABCF1	NM_001025091_3	chr6_ssto_hap7	1871448	1891586	+	0	0	0	0	0	0	0	0	0	0	0	0
ABCF1	NM_001025091_4	chr6_cox_hap2	2051221	2071356	+	0	0	0	0	0	0	0	0	0	0	0	0
ABCF1	NM_001025091_5	chr6_mcf_hap5	1921024	1941163	+	0	0	0	0	0	0	0	0	0	0	0	0
ABCF1	NM_001025091_6	chr6_qbl_hap6	1832076	1852211	+	0	0	0	0	0	0	0	0	0	0	0	0
ABCF1	NM_001090	chr6	30539170	30559309	+	1.60547	0.96009	0.000210135	0.260034	0.551943	0.000109228	8.86955e-05	0.21085	0.00018696	0.631431	0.496571	0.322634
ABCF1	NM_001090_1	chr6_dbb_hap3	1832805	1852944	+	0	0	0	0	0	0	0	0	0	0	0	0
ABCF1	NM_001090_2	chr6_mcf_hap5	1921024	1941163	+	0	0	0	0	0	0	0	0	0	0	0	0
ABCF1	NM_001090_3	chr6_qbl_hap6	1832076	1852211	+	0	0	0	0	0	0	0	0	0	0	0	0
ABCF1	NM_001090_4	chr6_mann_hap4	1887242	1907381	+	0	0	0	0	0	0	0	0	0	0	0	0
ABCF1	NM_001090_5	chr6_cox_hap2	2051221	2071356	+	0	0	0	0	0	0	0	0	0	0	0	0
ABCF1	NM_001090_6	chr6_ssto_hap7	1871448	1891586	+	0	0	0	0	0	0	0	0	0	0	0	0
ABCF2	NM_005692	chr7	150904923	150924317	-	18.973	17.8865	23.759	21.687	20.0822	20.1483	17.0462	19.0905	17.4204	16.3726	19.8595	22.9952
ABCF2	NM_007189	chr7	150909576	150924317	-	26.3029	27.0422	31.7736	33.2397	26.9901	24.6177	17.5161	16.6368	21.867	21.5756	30.1675	28.9948
ABCF3	NM_018358	chr3	183903863	183911795	+	10.8903	12.0253	14.483	14.3643	16.2759	16.1341	14.8341	13.3136	13.8669	14.3244	12.4826	11.7809
ABCG1	NM_004915	chr21	43639267	43717354	+	0.929589	0.580626	0.165389	0.00114021	0.567661	0.631047	2.00098	1.7319	0.639381	0.606941	0.489832	0.150545
ABCG1	NM_016818	chr21	43639267	43717354	+	0.788531	0.966916	0.743085	0.573562	1.28614	1.14077	2.31741	2.74195	0.746711	0.771177	0.282334	0.000559187
ABCG1	NM_207174	chr21	43640008	43717354	+	4.1842e-06	6.1103e-06	6.7357e-06	0	5.5454e-06	5.118e-07	5.405e-06	3.8305e-06	5.6587e-06	5.8085e-06	5.9634e-06	0.000466962
ABCG1	NM_207627	chr21	43619799	43717354	+	4e-09	0	1e-09	0	0	0	0	0	2.13e-08	9e-10	1.94e-08	0
ABCG1	NM_207628	chr21	43619922	43717354	+	1.378e-07	2e-09	8.95e-08	0	7e-10	0	1.42e-08	1e-09	3.649e-07	7.8e-08	3.582e-07	5e-10
ABCG1	NM_207629	chr21	43636187	43717354	+	2.23119e-05	0.000312153	5.60565e-05	0	0.000447524	0.0037826	9.94198e-05	0.000217649	2.17018e-05	4.80713e-05	2.36768e-05	0.38393
ABCG2	NM_001257386	chr4	89011416	89152474	-	0.0622994	0.209439	0.398847	0.107459	0.0522898	0.194825	0.0998816	8.0259e-06	9.316e-06	4.327e-06	0.291817	6.3634e-06
ABCG2	NM_004827	chr4	89011416	89080011	-	5.16519	4.99278	8.80508	8.88152	9.88277	9.09873	6.40607	5.96608	5.98813	6.34857	5.62537	5.92225
ABCG4	NM_001142505	chr11	119020299	119033374	+	0.0447579	0.0455581	0.0470967	0	0.0335059	0.0280613	0.0625932	0.0729141	0.0230305	0.0295523	0.0190866	0
ABCG4	NM_022169	chr11	119019750	119033374	+	3.49706e-05	3.49531e-05	3.55515e-05	0	3.86053e-05	3.26159e-05	3.63026e-05	3.39651e-05	5.0067e-05	3.38427e-05	4.56165e-05	0
ABCG5	NM_022436	chr2	44039611	44065958	-	0	0	0	0.0207857	0	0	0.0209478	0.0585309	0.0617375	0.0197825	0.0255923	0.0192557
ABCG8	NM_022437	chr2	44066103	44105605	+	0	0	0	0	0	0	0	0	0	0	0	0.0198318
ABHD1	NM_032604	chr2	27346657	27353680	+	0.0399951	0.203932	0.295631	0.125283	0.225312	0.451754	0.336451	0.351896	0.309326	0.277476	0.205287	0.154416
ABHD10	NM_001272069	chr3	111697723	111712215	+	0.870347	0.370587	1.36126	0.80977	2.01633	1.4093	1.46782	0.801405	2.21839	1.32895	0.817448	0.615632
ABHD10	NM_018394	chr3	111697723	111712215	+	18.7904	18.7119	22.8004	22.5946	25.5832	27.5803	24.2135	23.3486	27.1069	25.3879	20.0828	18.8404
ABHD10	NR_073570	chr3	111697723	111712215	+	0.273216	0.108972	0.207249	0.661725	0.337329	0.241075	0.397671	0.307194	0.0815404	0.294479	6.28e-08	0.607854
ABHD10	NR_073571	chr3	111697723	111712215	+	0.588289	0.499192	0.517747	0.709047	0.468921	0.778824	0.652278	0.546333	0.517561	0.730463	0.496094	0.410397
ABHD11	NM_001145364	chr7	73150425	73153184	-	0.561088	2.94872	3.22039	2.28715	1.99284	0.462286	1.46826	0.4882	1.21696	1.56841	3.59734	2.27573
ABHD11	NM_148912	chr7	73150427	73153184	-	5.9863	4.86225	6.14619	5.08847	6.11267	6.63523	4.15809	4.78118	5.45343	4.34598	3.99859	5.02141
ABHD11	NM_148913	chr7	73150427	73153184	-	0.201236	1.5842e-05	0.199221	5.917e-07	0.000104873	0.263699	1.7019e-06	6.2911e-06	2.3192e-06	0.426263	1e-10	0.564633
ABHD11	NR_026910	chr7	73150427	73153184	-	1.79459e-05	5.10191e-05	7.83819e-05	4.04352e-05	3e-10	4.25323e-05	4.56201e-05	1.57072e-05	8.0282e-05	0.000330994	0.000119552	9.50659e-05
ABHD11	NR_026912	chr7	73150427	73153190	-	0.607002	0.137074	1.24577	0.970153	0.352944	0	0.242371	0.261102	0	0.268762	0.615406	0
ABHD12	NM_001042472	chr20	25280834	25371618	-	18.5568	19.5144	22.342	20.4036	21.4006	22.0428	18.7721	21.423	23.4127	21.8078	18.2333	17.9914
ABHD12	NM_015600	chr20	25275379	25371618	-	2.81287	2.06782	2.1777	3.03632	2.69031	2.13383	3.01907	2.26021	3.14165	2.14986	2.6107	2.12565
ABHD12B	NM_001206673	chr14	51338878	51371688	+	1.11069e-05	1.19855e-05	1.34125e-05	1.17567e-05	0	0	1.38302e-05	1.18187e-05	1.65187e-05	1.16436e-05	1.45037e-05	1.09782e-05
ABHD12B	NM_181814	chr14	51338878	51371688	+	0.117156	0.0398121	0.0824567	0.0815366	0	0	0.246374	0.0381673	0.0603925	0.0774036	0.150327	0.0376838
ABHD13	NM_032859	chr13	108870763	108886603	+	3.30822	3.64148	3.0464	3.14738	4.06302	3.95147	4.41286	5.06379	4.60243	4.30052	3.85311	3.46004
ABHD14A	NM_015407	chr3	52009042	52015216	+	5.20248	4.17599	6.08388	5.84922	7.76516	7.12693	7.45612	8.30142	7.88273	7.93281	5.35173	3.75017
ABHD14A-ACY1	NR_037192	chr3	52009042	52023218	+	1.09425	0.737832	0.569482	1.86698	0.215587	0.347887	2.00364	1.71978	0.000484649	1.86711	0.616131	1.11968
ABHD14B	NM_001146314	chr3	52002526	52008646	-	12.3144	12.8371	15.043	12.9035	13.7338	14.8362	14.27	13.9169	12.789	12.9574	10.9996	11.3464
ABHD14B	NM_001254753	chr3	52002526	52008646	-	0.903934	0.773549	0.0894413	0.917298	1.16305	0.818781	2.76525	1.35288	2.48044	0.500666	1.89179	2.1335
ABHD14B	NM_032750	chr3	52002526	52008646	-	7.54224	7.71659	9.54001	10.9877	12.8926	12.0889	8.2318	9.64521	7.3255	9.10868	8.67322	8.20217
ABHD15	NM_198147	chr17	27887689	27894042	-	4.19294	3.95632	4.37872	3.90976	5.63483	5.08282	6.02113	6.1614	5.78419	5.43264	3.89588	3.5768
ABHD16A	NM_001177515	chr6	31654726	31670850	-	2.965e-07	4.525e-07	0.146967	0.244511	0.115739	9.235e-07	0.227912	0.0963414	0.052249	0.0324946	7.724e-07	0.00305183
ABHD16A	NM_001177515_1	chr6_cox_hap2	3164345	3180468	-	0	0	0	0	0	0	0	0	0	0	0	0
ABHD16A	NM_001177515_2	chr6_dbb_hap3	2940298	2956422	-	0	0	0	0	0	0	0	0	0	0	0	0
ABHD16A	NM_001177515_3	chr6_mann_hap4	2997616	3013741	-	0	0	0	0	0	0	0	0	0	0	0	0
ABHD16A	NM_001177515_4	chr6_mcf_hap5	3034406	3050531	-	0	0	0	0	0	0	0	0	0	0	0	0
ABHD16A	NM_001177515_5	chr6_qbl_hap6	2948369	2964501	-	0	0	0	0	0	0	0	0	0	0	0	0
ABHD16A	NM_001177515_6	chr6_ssto_hap7	2985532	3001668	-	0	0	0	0	0	0	0	0	0	0	0	0
ABHD16A	NM_021160	chr6_ssto_hap7	2985532	3001955	-	0	0	0	0	0	0	0	0	0	0	0	0
ABHD16A	NM_021160_1	chr6_qbl_hap6	2948369	2964788	-	0	0	0	0	0	0	0	0	0	0	0	0
ABHD16A	NM_021160_2	chr6_cox_hap2	3164345	3180755	-	0	0	0	0	0	0	0	0	0	0	0	0
ABHD16A	NM_021160_3	chr6_dbb_hap3	2940298	2956709	-	0	0	0	0	0	0	0	0	0	0	0	0
ABHD16A	NM_021160_4	chr6	31654726	31671137	-	7.34543	8.39475	8.69658	8.91322	8.7608	8.23184	6.37739	7.03347	8.1437	8.15646	6.49218	7.27934
ABHD16A	NM_021160_5	chr6_mann_hap4	2997616	3014028	-	0	0	0	0	0	0	0	0	0	0	0	0
ABHD16A	NM_021160_6	chr6_mcf_hap5	3034406	3050818	-	0	0	0	0	0	0	0	0	0	0	0	0
ABHD16A	NR_033488	chr6_mcf_hap5	3034406	3050531	-	0	0	0	0	0	0	0	0	0	0	0	0
ABHD16A	NR_033488_1	chr6	31654726	31670850	-	1.5533e-06	7.159e-07	0.144063	6.33952e-05	0.00398353	1.0499e-06	2.27674e-05	1.1223e-06	8.258e-07	2.6455e-06	2.5027e-06	0.107099
ABHD16A	NR_033488_2	chr6_ssto_hap7	2985532	3001668	-	0	0	0	0	0	0	0	0	0	0	0	0
ABHD16A	NR_033488_3	chr6_mann_hap4	2997616	3013741	-	0	0	0	0	0	0	0	0	0	0	0	0
ABHD16A	NR_033488_4	chr6_dbb_hap3	2940298	2956422	-	0	0	0	0	0	0	0	0	0	0	0	0
ABHD16A	NR_033488_5	chr6_qbl_hap6	2948369	2964501	-	0	0	0	0	0	0	0	0	0	0	0	0
ABHD16A	NR_033488_6	chr6_cox_hap2	3164345	3180468	-	0	0	0	0	0	0	0	0	0	0	0	0
ABHD16A	NR_033489	chr6	31654726	31671137	-	0.704651	0.739619	0.722669	0.375456	0.290144	0.980545	0.976094	0.502616	0.52895	0.985187	1.07238	0.854834
ABHD16A	NR_033489_1	chr6_cox_hap2	3164345	3180755	-	0	0	0	0	0	0	0	0	0	0	0	0
ABHD16A	NR_033489_2	chr6_dbb_hap3	2940298	2956709	-	0	0	0	0	0	0	0	0	0	0	0	0
ABHD16A	NR_033489_3	chr6_qbl_hap6	2948369	2964788	-	0	0	0	0	0	0	0	0	0	0	0	0
ABHD16A	NR_033489_4	chr6_mcf_hap5	3034406	3050818	-	0	0	0	0	0	0	0	0	0	0	0	0
ABHD16A	NR_033489_5	chr6_mann_hap4	2997616	3014028	-	0	0	0	0	0	0	0	0	0	0	0	0
ABHD16A	NR_033489_6	chr6_ssto_hap7	2985532	3001955	-	0	0	0	0	0	0	0	0	0	0	0	0
ABHD16B	NM_080622	chr20	62492566	62494341	+	1.0191	0.973715	1.64592	0.963192	1.68482	1.1689	1.40525	1.27628	0.788043	0.883694	1.55225	1.41356
ABHD2	NM_007011	chr15	89631381	89745591	+	0.424105	0.599103	0.318401	0.442716	0.480557	0.329989	0.449614	0.439695	0.504991	0.420021	0.397901	0.147306
ABHD2	NM_152924	chr15	89631381	89745591	+	5.08237	5.15628	6.05565	5.60942	6.36301	6.50456	6.13455	6.5424	7.26953	7.01287	5.14476	5.10897
ABHD3	NM_138340	chr18	19230858	19284766	-	2.78506	2.12116	3.93303	4.28334	4.65401	4.14755	3.66263	3.25054	3.93043	4.20674	2.7392	3.23464
ABHD4	NM_022060	chr14	23067147	23081265	+	0.701611	0.89315	1.15466	1.30148	1.89807	1.85674	1.26552	1.69271	0.915325	1.17317	0.53405	0.951653
ABHD5	NM_016006	chr3	43732375	43764217	+	4.12944	3.92892	4.75954	5.05649	4.402	4.37959	3.26673	3.02591	3.89745	3.76659	4.87084	4.67974
ABHD6	NM_020676	chr3	58223259	58280461	+	6.04235	6.71777	8.26018	6.7259	10.6321	10.4598	10.3601	10.4127	10.0918	10.3978	5.64736	5.09423
ABHD8	NM_024527	chr19	17402940	17414282	-	6.98909	6.27775	6.60716	6.86648	10.0827	10.0662	11.1478	10.924	9.19889	9.27839	4.00217	4.11756
ABI1	NM_001012750	chr10	27035525	27150016	-	1.93526e-05	1.63814e-05	1.54272e-05	2.31173e-05	2.61945e-05	4.98982e-05	1.53627e-05	1.61572e-05	7.93007e-05	9.8525e-06	1.36206e-05	2.37342e-05
ABI1	NM_001012751	chr10	27035525	27150016	-	0.535834	1.58921	1.17157	0.708889	0.819049	0.261944	0.636169	0.58509	0.540289	1.00021	0.569663	1.64622
ABI1	NM_001012752	chr10	27035525	27150016	-	3.93937	2.41873	3.23559	3.97011	2.75207	4.30993	3.2838	3.76652	4.22211	2.87123	3.82126	2.23353
ABI1	NM_001178116	chr10	27035525	27150016	-	0.0486815	0.0232475	0.0202898	1e-10	0.0457762	0	0	0	0.0338872	1.1e-09	0.0462566	0
ABI1	NM_001178119	chr10	27035525	27150016	-	1.196e-07	0	0.12027	2e-10	0	1.3e-09	2.5e-09	4.2e-09	3.1e-09	6.2e-09	3.3e-09	0
ABI1	NM_001178120	chr10	27035525	27150016	-	1.00908e-05	1.97229e-05	1.05087e-05	1.03647e-05	2.6279e-05	1.76007e-05	1.07888e-05	6.3672e-06	2.5668e-05	8.3171e-06	7.6171e-06	2.31894e-05
ABI1	NM_001178121	chr10	27035525	27150016	-	3.05485	3.8256	3.13859	2.69003	3.66358	2.37848	3.27322	2.34501	2.05219	3.38245	3.17266	2.9258
ABI1	NM_001178122	chr10	27035525	27150016	-	0	0	0	0.0848015	0.0863472	0.211969	0	0.0859492	0	0.0679245	0	0
ABI1	NM_001178123	chr10	27035525	27150016	-	1.436e-07	2.138e-07	1.934e-07	3.454e-07	1.3291e-06	1.7928e-06	1.07e-07	0	2.4027e-06	0	5.543e-07	1.7177e-06
ABI1	NM_001178124	chr10	27035525	27150016	-	0.141587	0.132139	0.18531	0.258887	0.49533	0.589877	0.108164	5.674e-07	0.436169	8.6e-09	0.641538	0.520107
ABI1	NM_001178125	chr10	27035525	27150016	-	0	0	9e-10	4e-10	0	0	0.0373613	0	0	0	3e-10	0
ABI1	NM_005470	chr10	27035525	27150016	-	0.000110684	0	0	0.0737712	0	0	0	0	0	0.0299143	0	0
ABI2	NM_005759	chr2	204193003	204296892	+	3.51995	3.46897	3.13856	3.19625	3.23218	3.51455	2.83789	2.62204	2.85388	2.77199	3.5008	3.43655
ABI3	NM_001135186	chr17	47287589	47300587	+	4.6804e-06	0	3.4096e-06	0.000175309	2.43982e-05	0	0	4e-10	0	0	5.49441e-05	8.8751e-06
ABI3	NM_016428	chr17	47287589	47300587	+	0.47549	0.349849	0.473294	0.577914	0.267413	0.596602	0.0832089	0.129089	0	0	0.406425	0.229348
ABI3BP	NM_015429	chr3	100468179	100712334	-	0.0836506	0.158091	0.100551	0.198827	0.147613	0.202359	0.187908	0.175139	0.0738924	0.153914	0.168429	0.230436
ABL1	NM_005157	chr9	133710831	133763062	+	7.00929	6.3828	7.85228	8.27644	8.8378	9.1916	6.98968	6.99278	8.77914	7.94044	6.61994	7.10178
ABL1	NM_007313	chr9	133589268	133763062	+	2.51522	3.94938	2.5448	2.30938	3.50619	3.26406	3.46202	4.58783	2.25649	2.80451	2.46996	2.3882
ABL2	NM_001136000	chr1	179068462	179112224	-	0.00458019	0.00557615	0.335424	1.14833	1.59943	1.87128	1.42182	3.67948	0.58349	2.76497	0.00130497	0.0618022
ABL2	NM_001136001	chr1	179079716	179198819	-	3.09767	3.08852	1.9276	2.51025	2.47544	2.55521	5.3143	4.55128	3.85772	2.88119	1.77824	2.01075
ABL2	NM_001168236	chr1	179068462	179198819	-	0	0	0	4.464e-07	1.41e-08	8e-10	0	1.033e-07	0	3.18e-07	0	0
ABL2	NM_001168237	chr1	179068462	179198819	-	0.000360212	0.000292266	0.00949287	0.125536	0.07292	0.0434857	0.0428299	0.108673	0.0357094	0.132842	2.8533e-05	0.000896521
ABL2	NM_001168238	chr1	179068462	179198819	-	0	0	0	1.07e-07	2.2e-09	1e-10	0	2.89e-08	0	1.377e-07	0	0
ABL2	NM_001168239	chr1	179068462	179112224	-	4.40588	4.76124	4.40286	4.16148	4.89329	5.5323	7.95579	8.83798	6.06208	5.79721	5.28918	5.04921
ABL2	NM_005158	chr1	179068462	179112224	-	4.66572	4.34805	3.3636	3.05938	5.65622	5.62649	8.30304	7.83029	6.37735	4.03764	4.08175	4.21437
ABL2	NM_007314	chr1	179068462	179198819	-	0.348994	0.221526	0.102312	0.350071	0.278177	0.144892	0.273221	0.253143	0.413745	0.208337	0.0871915	0.0649953
ABLIM1	NM_001003407	chr10	116190869	116444414	-	0.00738454	0.297141	0.00772991	0.0076414	0.00819729	0.842894	0.00765768	1.49462	0.0114049	0.762784	0.38337	0.00705848
ABLIM1	NM_001003408	chr10	116190869	116444414	-	0	8.1e-09	0	0	0	0	0	0	0	0	0	0
ABLIM1	NM_002313	chr10	116190869	116418058	-	0.413271	0.374564	0.412159	0.451855	0.697405	0.00300275	0.678579	0.0332408	0.561316	0.000299444	0.000214577	0.647685
ABLIM1	NM_006720	chr10	116190869	116286685	-	2.86702	2.77024	3.33052	3.452	3.39146	3.11575	2.88478	2.73815	2.84727	2.59797	2.97386	2.55367
ABLIM2	NM_001130083	chr4	7967037	8160559	-	0	0	0	0	0	0.0269253	0	0	0	0	0	0
ABLIM2	NM_001130084	chr4	7967037	8160559	-	0	5e-10	0	0	0	1e-10	0	0	0	0	0	0
ABLIM2	NM_001130085	chr4	7967037	8160559	-	0	7.555e-07	3.49e-08	0	0	2e-10	0	3.28e-08	0	0	0	0
ABLIM2	NM_001130086	chr4	7967037	8160559	-	0	8.8978e-06	1.084e-06	0	2.936e-07	3e-10	0	1.0151e-06	0	0	0	0
ABLIM2	NM_001130087	chr4	7967037	8160559	-	0	0.00199118	0.00203653	0	7.133e-07	6e-10	0	0.0018953	0	0	1.6586e-06	0
ABLIM2	NM_001130088	chr4	8008748	8160559	-	0	0	0	0	0.0239534	1.8702e-06	0.0670827	0	0	0.0211149	0.0273152	0
ABLIM2	NM_032432	chr4	7967037	8160559	-	0	0.0142237	0.0315291	0	9.849e-07	8e-10	1.599e-06	0.0292706	0	0	0	0
ABLIM3	NM_014945	chr5	148521054	148639999	+	0.728339	0.728643	0.999821	0.949997	1.44177	1.47492	0.828253	0.820191	0.954166	0.819449	0.616892	0.702248
ABO	NM_020469	chr9	136130563	136150630	-	0	0	0	0	0	0	0	0	0	0	0	0
ABP1	NM_001091	chr7	150549565	150558379	+	0	0	0.0234562	0	0	0	0.0233681	0	0	0	0	0
ABP1	NM_001272072	chr7	150549565	150558379	+	0	0	0.000369444	0	0	0	0.000370732	0	0	0	0	0
ABR	NM_001092	chr17	906758	1012340	-	16.1483	17.001	19.1559	17.8009	17.2475	16.4061	15.9121	15.8286	18.2734	17.4126	15.9939	15.1601
ABR	NM_001159746	chr17	906758	1090616	-	0.3468	0.404331	0.22454	0.161793	0.560356	0.56447	0.515997	0.60326	0.262831	0.306214	0.287611	0.294926
ABR	NM_001256847	chr17	906758	935078	-	1.97e-08	0.0327608	0	0	0	0.0772168	1e-10	0.0753995	0	0	1.2e-08	0
ABR	NM_021962	chr17	906758	1083166	-	0.0903813	0.159914	0.335386	0.156394	0.576807	0.107167	0.726775	0.232479	0.553588	1.97828e-05	0.178858	6.77285e-05
ABR	NR_046393	chr17	906758	982386	-	0.0824457	8.742e-07	2.507e-07	3.6281e-06	3.383e-06	5.707e-07	4.3783e-06	3.462e-06	5.7345e-06	0.0398324	3.8696e-06	0
ABRA	NM_139166	chr8	107771711	107782472	-	0	0	0	0	0	0.0186841	0	0	0	0	0	0
ABRACL	NM_021243	chr6	139349819	139364439	+	24.789	26.7243	32.5842	31.7542	31.6048	35.0584	29.1716	25.5697	33.7366	31.9313	30.7124	26.9998
ABT1	NM_013375	chr6	26597171	26600277	+	16.6011	16.8599	19.8652	19.8457	17.4033	20.5291	16.0132	16.344	16.4698	16.4987	15.1947	16.8407
ABTB1	NM_032548	chr3	127391781	127399769	+	0.132201	0.000436232	4.3023e-06	8.879e-07	0.193745	1.298e-07	0.371081	3.3819e-06	9.15524e-05	1.6972e-06	4.0688e-06	2.2829e-06
ABTB1	NM_172027	chr3	127391781	127399769	+	0.541931	0.758647	0.712651	0.397097	0.600604	0.906978	1.20416	1.23635	0.487608	0.843604	0.223871	0.464772
ABTB1	NR_033429	chr3	127391781	127399769	+	0.150017	0.168399	0.157009	0.167553	0.229521	1.19715e-05	0.000304391	0.15186	0.620142	0.113665	0.253592	0.000155577
ABTB2	NM_145804	chr11	34172534	34379555	-	2.0431	2.44389	2.13714	2.11295	3.03834	2.8626	3.67931	3.48271	3.24226	3.01473	2.2139	1.91741
ACAA1	NM_001130410	chr3	38164201	38178733	-	1.63596	0.696146	1.62743	1.98371	1.63928	1.38845	1.16047	1.44949	1.4241	1.29229	0.975582	1.58408
ACAA1	NM_001607	chr3	38164201	38178733	-	11.9149	11.8251	11.5276	11.2576	14.5693	13.0837	12.7312	10.8773	10.69	10.1921	9.67945	8.65168
ACAA1	NR_024024	chr3	38164201	38178733	-	0.66523	0.284021	0.648141	0.602545	0.672038	0.551243	0.689144	0.437517	0.51277	0.929497	0.678745	0.80581
ACAA2	NM_006111	chr18	47309874	47340251	-	15.4659	15.4927	16.8872	17.5143	20.7003	19.7428	16.7309	16.6761	16.917	17.1952	15.1084	13.4938
ACACA	NM_198834	chr17	35441927	35766902	-	1.32991	0.990102	1.03494	0.821022	0.898504	1.03072	2.04898	1.93677	0.833676	2.12493	1.21421	1.42244
ACACA	NM_198836	chr17	35441927	35716059	-	5.49625	6.14318	3.41184	3.8728	3.01847	3.21911	3.53202	5.79718	3.70699	2.33921	3.8114	3.66814
ACACA	NM_198837	chr17	35441927	35656692	-	1.71382e-05	1.94426e-05	1.41815e-05	1.4874e-05	2.75597e-05	1.02635e-05	1.78455e-05	1.61052e-05	3.51401e-05	2.8504e-06	1.26364e-05	9.7946e-06
ACACA	NM_198838	chr17	35441927	35656692	-	0.166931	1.04479	0.397122	0.159511	0.430134	0.296545	0.961274	1.03962	0.570236	0.559515	0.420756	0.322742
ACACA	NM_198839	chr17	35441927	35766902	-	1.636e-07	0.155619	0.0745839	0.0794803	2.959e-07	3.0592e-06	0.22298	0.187998	0.103568	5.2084e-06	0.157811	0.0668336
ACACB	NM_001093	chr12	109577202	109706030	+	0.709163	0.744413	0.941967	0.996115	1.11407	1.05664	1.23024	1.32465	0.973347	0.989185	0.893824	0.738267
ACAD10	NM_001136538	chr12	112123857	112194911	+	0.495335	0.204374	0.757527	9.94515e-05	0.579933	0.775718	1.36195	1.81946	0.568537	0.933241	0.3987	0.380895
ACAD10	NM_025247	chr12	112123857	112194911	+	1.67234	2.19952	1.75626	2.2391	1.94419	1.85998	3.03545	2.95784	3.20067	3.20427	1.75067	1.75022
ACAD11	NM_032169	chr3	132276982	132378975	-	2.46193	2.4801	2.67344	2.5833	4.06127	3.94846	5.17542	5.49142	4.54101	4.0262	2.52496	2.25798
ACAD8	NM_014384	chr11	134123434	134135746	+	8.17383	9.07153	7.89543	7.88547	10.2147	11.5849	13.4278	13.0429	11.0009	11.0495	7.27813	6.81419
ACAD9	NM_014049	chr3	128598333	128631957	+	12.7611	11.6792	10.161	12.5991	12.1243	10.6071	9.34144	9.05374	8.80205	9.7558	8.72017	11.0806
ACAD9	NR_033426	chr3	128598333	128631957	+	1.12621	1.34106	2.54591	0.92471	2.24154	1.74754	1.64997	1.33266	1.53913	1.87822	2.11637	1.54024
ACADL	NM_001608	chr2	211052716	211090215	-	0	0	0.0232817	0	0	0.0207985	0	0.0648036	0.0341771	0	0.056674	0.0426403
ACADM	NM_000016	chr1	76190043	76229355	+	16.6134	15.568	16.6527	16.9283	20.029	19.055	15.0414	16.1117	17.5377	16.8168	14.4977	16.0593
ACADM	NM_001127328	chr1	76190043	76229355	+	6.5839e-06	0.147052	0.242849	0.281562	0.139761	0.245772	0.266683	8.2305e-06	1.07414e-05	7.3428e-06	0.338381	0.247908
ACADS	NM_000017	chr12	121163571	121177811	+	3.92577	4.62712	4.91141	4.12324	3.98897	4.32857	4.92327	3.86569	3.85102	3.74517	3.11852	2.51568
ACADSB	NM_001609	chr10	124768429	124817806	+	2.68418	2.90328	2.67196	2.89196	3.18329	3.01158	3.21471	2.93609	2.75686	2.55323	2.83323	2.50171
ACADVL	NM_000018	chr17	7123150	7128586	+	91.7814	85.118	93.4882	83.6898	111.528	112.087	144.396	139.969	124.223	124.546	66.465	74.7422
ACADVL	NM_001033859	chr17	7123150	7128586	+	9.31379	9.76216	8.87315	9.2661	10.8351	8.49877	7.23921	2.47794	10.5008	6.59344	13.5525	6.98567
ACADVL	NM_001270447	chr17	7120444	7128586	+	0.910723	0.37075	0.000188523	0.834223	0.526394	0.000257282	0.84182	0.924052	3.32947	0.00039928	0.990368	0.000429399
ACADVL	NM_001270448	chr17	7123150	7128586	+	20.8304	21.1983	22.3528	22.6961	26.4379	27.8584	29.2868	34.6515	31.24	40.5807	20.0907	19.2753
ACAN	NM_001135	chr15	89346674	89418585	+	0.0368554	0.0875421	0.0516612	0.0574645	0.0413581	0.0693839	1.2205e-05	0.20426	0.171051	0.0814866	0.0472097	0.023668
ACAN	NM_013227	chr15	89346674	89418585	+	4.8202e-05	4.90733e-05	4.99203e-05	5.07533e-05	5.4237e-05	4.4999e-05	0.186687	4.74899e-05	7.46114e-05	0.109624	6.08773e-05	4.67905e-05
ACAP1	NM_014716	chr17	7239848	7254793	+	0.219347	0.312736	0.254133	0.137056	0.295929	0.227032	0.276231	0.15005	0.169577	0.130407	0.253079	0.275039
ACAP2	NM_012287	chr3	194995465	195163817	-	7.06076	7.11547	6.48616	6.96292	6.80191	7.40296	7.08205	6.90534	7.01439	6.61613	7.4667	7.65022
ACAP3	NM_030649	chr1	1227764	1243269	-	6.62939	6.41231	6.35735	6.16633	5.13057	5.45566	5.72023	5.6102	5.15751	5.56103	5.50455	5.84014
ACAT1	NM_000019	chr11	107992258	108018891	+	32.1336	31.2471	32.7655	31.5001	38.7854	38.436	43.9798	44.7373	41.6634	39.079	30.2673	30.3449
ACAT2	NM_005891	chr6	160182989	160200087	+	47.8947	47.5114	47.6253	48.8679	55.3181	57.7501	35.884	32.394	39.7569	40.5393	38.7672	37.5142
ACBD3	NM_022735	chr1	226332380	226374423	-	31.6738	33.6573	37.6602	36.9198	42.1946	42.3142	53.2743	53.3367	44.4279	40.6333	30.0794	28.0909
ACBD4	NM_001135704	chr17	43209967	43221543	+	8.6225e-06	1.18117e-05	0	0	0	0.0819617	0	0.085657	0	0.238974	0.118948	0.0670199
ACBD4	NM_001135705	chr17	43213014	43221543	+	0.366642	2.84e-07	0.985213	0.000777756	0.160003	0.835364	0.229254	0.811762	0.00587557	0.856489	0.639611	0.000484656
ACBD4	NM_001135706	chr17	43213014	43221543	+	0.750618	0.28319	0.000320386	0.341014	0.786892	0.430462	1.14532	0.676879	0.838417	0.104139	7.9072e-05	0.101215
ACBD4	NM_001135707	chr17	43213014	43220326	+	0.63952	0.150922	0.310105	1.0454	1.13209	0.501922	0.43514	0.574383	0.306585	0.762363	0.201422	0.238595
ACBD4	NM_024722	chr17	43213014	43221543	+	0.241618	0.781327	0.447674	0.628525	0.821599	2.4567e-06	1.48189	1.22991	0.998061	0.355717	6.07e-08	0.626203
ACBD5	NM_001042473	chr10	27484143	27531068	-	1.51966	2.25974	0.407345	1.43886	0.67882	0.59824	1.94798	3.23353	1.17517	1.04919	3.46351	1.40636
ACBD5	NM_001271512	chr10	27484143	27529808	-	4.69178	3.65452	3.13613	4.1499	4.17002	4.79241	3.44467	3.60185	4.61652	4.44476	3.12239	3.74408
ACBD5	NM_145698	chr10	27484143	27529808	-	5.37965	5.27374	7.78436	4.73985	6.82191	6.85692	6.32012	5.3171	5.78437	6.34222	5.78223	6.7631
ACBD5	NR_024150	chr10	27484143	27531068	-	1.9018e-06	1.8569e-06	2.35e-08	0.011156	1.857e-07	7.3e-09	0	6.438e-06	9.4207e-06	1e-10	1.21872e-05	2.2801e-06
ACBD5	NR_073195	chr10	27484143	27531068	-	0.310363	0.359317	4.87e-08	0.030391	7.8e-09	1.88e-08	0.157456	0.174747	0.34734	0.228591	0.283461	0.248812
ACBD5	NR_073196	chr10	27484143	27529808	-	0.484589	0.325019	0.702422	0.609179	0.21341	0.376243	0.496572	0	0.163063	0.407122	0.392318	0.368768
ACBD5	NR_073197	chr10	27484143	27529808	-	8.323e-07	3.3253e-06	1.5489e-06	0.0410216	1.82e-08	1.5966e-06	2e-10	6.2845e-06	1.47048e-05	0.000634649	9.8604e-06	3.6788e-06
ACBD6	NM_032360	chr1	180257352	180472022	-	49.6846	48.5243	39.5277	36.8358	36.0919	35.8201	38.6996	38.5846	33.5036	31.379	44.1553	45.7994
ACBD7	NM_001039844	chr10	15117474	15130775	-	2.66454	2.32021	2.4325	2.15538	2.58483	3.18647	1.43932	1.42729	2.60562	2.29014	2.44798	2.3218
ACCS	NM_001127219	chr11	44087729	44105569	+	1.34691e-05	2.7977e-06	0.000277114	9.9107e-06	7.0919e-06	7.0081e-06	3.7708e-06	4.98622e-05	0.013067	0.000247721	4.97658e-05	0.325961
ACCS	NM_032592	chr11	44087812	44105569	+	1.45794	1.22462	1.07794	1.14599	1.43846	1.29973	1.69178	1.67483	1.29407	1.87539	1.50862	0.881633
ACCSL	NM_001031854	chr11	44069531	44081527	+	0	0	0	0	0	0	0.0325705	0.0303052	0	0	0	0
ACD	NM_001082486	chr16	67691415	67694718	-	13.1611	12.9875	16.596	13.8005	15.1011	13.9635	8.19829	6.53397	10.9934	10.4835	12.395	12.8796
ACD	NM_001082487	chr16	67691415	67694718	-	8.51136e-05	8.82403e-05	3.65556e-05	0.467011	4.79344e-05	0.533944	8.73205e-05	7.39381e-05	9.38067e-05	0.000117921	7.27006e-05	2.74786e-05
ACD	NM_022914	chr16	67691415	67694718	-	0.671731	0.913634	1.51824	1.3742	0.794671	0.974982	1.42329	0.729252	0.453419	0.519873	1.50144	0.935817
ACE	NM_000789	chr17	61554422	61575741	+	0.0685489	0.0981583	0.101444	0.0621486	0.108311	0.0504163	0.0224673	0.0209448	0	0.0212367	0.0549313	0.0413355
ACE	NM_001178057	chr17	61562178	61575741	+	3.51192e-05	8.508e-07	1.0571e-06	4.4886e-06	1.1039e-06	5.346e-07	2.5604e-06	0	0.0265519	2.2606e-06	1.218e-07	9.84e-08
ACE	NM_152830	chr17	61562178	61575741	+	0.0929971	2.302e-07	3.03e-07	0.024577	3.172e-07	2.034e-07	6.292e-07	0	0.000161456	5.6e-07	6.99e-08	5.61e-08
ACE2	NM_021804	chrX	15579156	15620192	-	0.0153952	0	0.0324004	0.0320344	0.0345901	0.0144841	0.0968686	0.120344	0.095202	0.106774	0.0197295	0
ACER1	NM_133492	chr19	6306510	6333640	-	0	0	0	0	0	0	0	0	0	0	0	0
ACER2	NM_001010887	chr9	19408925	19452500	+	0.40185	0.428641	0.906615	1.23502	2.38725	2.05253	2.40909	2.74881	1.95266	2.16149	0.441504	0.535198
ACER3	NM_018367	chr11	76571917	76734850	+	3.68229	3.9086	3.52683	3.34745	3.8476	3.15446	3.59179	3.66931	3.75089	3.24958	3.42148	3.91479
ACHE	NM_000665	chr7	100487615	100493541	-	0	6.1535e-06	0.0530871	0.0524901	0.02833	2.63399e-05	0.132228	0.270813	3.246e-07	0.099848	1.0853e-06	5.2677e-06
ACHE	NM_015831	chr7	100487615	100493541	-	0	0.0937567	1.8693e-06	1.7586e-06	1.9072e-06	0.051969	1.5973e-06	1.4187e-06	0.0854282	3.353e-07	0.212467	0.0888099
ACIN1	NM_001164814	chr14	23527774	23564823	-	4.23241	4.11872	4.53506	4.24177	5.73676	6.00713	3.02259	3.5533	3.635	4.71012	4.53578	3.94004
ACIN1	NM_001164815	chr14	23527774	23564823	-	8.98823	9.83425	10.027	10.1461	12.1174	13.0825	9.38372	9.2461	12.2149	9.30286	11.1995	11.9783
ACIN1	NM_001164816	chr14	23527774	23540779	-	8.30036	9.76906	7.6883	9.06711	8.40421	8.12176	4.61972	3.71152	5.81552	4.30158	6.80685	7.25258
ACIN1	NM_001164817	chr14	23527774	23540779	-	7.50963	6.63104	7.74688	6.87358	7.36837	6.32537	2.88299	3.57177	2.52373	5.1326	9.83166	9.28278
ACIN1	NM_014977	chr14	23527774	23564823	-	7.81386e-05	7.13497e-05	8.71188e-05	0.000164542	0.000124164	9.06093e-05	0.000866929	0.000440962	0.000143594	0.32003	6.7984e-05	6.59134e-05
ACLY	NM_001096	chr17	40023179	40075272	-	50.4035	67.8499	55.4463	52.2432	54.173	52.791	49.9526	52.3221	46.4896	55.3423	57.7457	51.9927
ACLY	NM_198830	chr17	40023179	40075272	-	41.1571	28.3461	37.5357	35.534	33.61	31.4093	37.3459	35.4232	38.6856	28.9914	24.28	27.7525
ACMSD	NM_138326	chr2	135596186	135659602	+	0	0	0	0	0	0	0.0496318	0	0	0	0	0
ACN9	NM_020186	chr7	96745905	96811075	+	7.08329	6.46991	6.46486	6.64675	9.18976	8.27458	7.97925	7.82474	7.72196	7.1536	7.44747	7.54041
ACO1	NM_002197	chr9	32384601	32450832	+	9.71859	10.1401	12.4991	12.1838	14.4715	13.8797	12.7913	13.3899	11.9209	12.8237	10.3886	10.4861
ACO2	NM_001098	chr22	41865129	41924993	+	14.8284	17.1515	18.8501	18.0973	18.0133	17.0881	16.5214	16.4018	17.9278	17.7183	16.5518	15.6681
ACOT1	NM_001037161	chr14	74003928	74010498	+	3.44071	2.28996	3.57456	3.01366	4.51707	4.86594	5.02162	3.85133	4.05328	4.71736	2.92749	3.3893
ACOT11	NM_015547	chr1	55013807	55100417	+	0.177726	0.0908601	0.000849563	0.0834645	3.12193e-05	0.0114748	0.0955957	2.71591e-05	0.0782415	0.220008	6.4916e-06	0.00881341
ACOT11	NM_147161	chr1	55013807	55076005	+	0.044273	0.135189	0.0892307	0.0907712	0.172446	0.041087	0.138092	0.149967	0.136496	4.451e-07	0.131143	0.126158
ACOT12	NM_130767	chr5	80625947	80689988	-	0	0	0	0	0	0	0	0	0.0435252	0	0	0
ACOT13	NM_001160094	chr6	24667263	24705295	+	0.0880724	0.0909215	0.147238	0.0259042	0.168905	0.048568	0.075928	0.132435	0.0428933	0.0535987	0.105222	0.118605
ACOT13	NM_018473	chr6	24667263	24705295	+	2.27062	2.41585	2.78358	2.45924	3.35553	3.59897	4.59014	4.12224	3.50921	3.43799	2.36517	2.40517
ACOT2	NM_006821	chr14	74035763	74042362	+	6.8113	6.72575	6.21871	8.44724	10.0027	8.9456	11.3063	10.0058	8.58643	9.88176	5.66871	6.07938
ACOT2	NR_046028	chr14	74034324	74042362	+	1.02059	0.788641	0.592247	0.535586	1.0563	1.08827	0.929123	0.511515	1.27737	0.709988	1.0654	0.812933
ACOT4	NM_152331	chr14	74058410	74062470	+	0	0	0.036884	0	0.0393594	0.0328983	0	0	0	0	0	0
ACOT6	NM_001037162	chr14	74083548	74086592	+	0	0	0	0	0	0	0	0	0	0	0	0
ACOT7	NM_007274	chr1	6324332	6453826	-	12.0662	12.1705	13.5334	16.2072	12.076	12.7034	6.06382	5.54048	9.28252	10.7936	12.7793	12.0196
ACOT7	NM_181864	chr1	6324332	6445883	-	40.1824	38.5269	44.0173	37.7674	46.7043	45.9228	57.3052	51.0336	53.3536	51.9549	37.1258	33.4999
ACOT7	NM_181865	chr1	6324332	6420764	-	4.762e-05	0.570323	0.000102417	0.157881	4.3243e-05	0.541497	2.6678e-05	3.35621e-05	0.00010851	8.04676e-05	0.000165145	0.000166954
ACOT7	NM_181866	chr1	6324332	6419004	-	7.30945	8.63312	12.4806	9.03306	17.9825	15.9469	19.4521	16.3316	6.15028	6.87761	5.97581	9.36027
ACOT8	NM_005469	chr20	44470360	44486048	-	20.3333	17.2764	16.2892	16.427	19.3834	19.5259	26.0093	23.0635	19.8981	18.7444	13.5101	14.235
ACOT9	NM_001033583	chrX	23721777	23761407	-	4.33239	3.72991	3.64532	3.40948	4.24638	4.71892	2.83958	3.16131	3.14807	4.46385	3.81615	6.56782
ACOT9	NM_001037171	chrX	23721777	23761407	-	34.4938	33.8566	35.3563	34.3979	41.1148	38.6945	38.0643	35.4779	36.9795	38.0196	34.8361	32.9352
ACOX1	NM_001185039	chr17	73937589	73975515	-	0.34868	0.155881	0.387997	1.19632e-05	0.094511	0.309317	0.186287	0.461143	0.619608	0.178367	0.106775	0.348048
ACOX1	NM_004035	chr17	73937589	73975515	-	6.26133	5.87941	6.93518	6.9427	8.3082	7.27426	8.85526	9.58328	7.59493	7.95163	5.46839	5.23846
ACOX1	NM_007292	chr17	73937589	73975515	-	1.31998	1.72532	1.73372	1.5586	1.86794	1.93754	1.65769	1.26897	1.43226	1.93174	1.93978	1.36795
ACOX2	NM_003500	chr3	58490863	58522929	-	3.18698	3.24611	3.33244	3.1202	3.90728	4.39686	4.27596	4.07477	3.6311	4.15525	3.19513	3.44404
ACOX3	NM_001101667	chr4	8368009	8442452	-	4.10998	2.79956	0.828136	1.88357	1.31092	1.17118	0.9442	1.13875	2.48918	1.4778	3.6317	2.2154
ACOX3	NM_003501	chr4	8368009	8442452	-	2.86391	3.99594	6.22682	4.82215	6.33757	6.93032	5.96932	5.77106	4.85098	5.91269	4.19596	4.74129
ACOXL	NM_001142807	chr2	111490150	111875799	+	0.0232705	0	0	0	0	0	0	0	0	0	0	0
ACP1	NM_001040649	chr2	264869	272481	+	0.663036	1.04974	1.12871	0.352379	0.375729	1.35396	0.379956	1.26162	1.15266	1.47337	0.767061	0.549222
ACP1	NM_004300	chr2	264869	278282	+	47.6332	43.3716	46.104	48.4946	46.7156	46.3806	31.7378	30.3289	37.7027	34.897	49.3275	49.9481
ACP1	NM_007099	chr2	264869	278282	+	7.76589	8.95796	5.63777	6.95945	7.54291	5.80522	7.64513	6.27863	6.31953	6.06224	7.22054	8.61561
ACP1	NR_024080	chr2	264869	278282	+	2.16087	3.29682	2.60946	2.34889	2.98745	4.73552	2.38051	1.52011	4.0459	3.45051	4.48478	2.92858
ACP2	NM_001131064	chr11	47267070	47270457	-	0	0.403427	0.263129	0.722195	0	0.240367	0	0.244161	0	0.449609	0.237535	0
ACP2	NM_001610	chr11	47260853	47270457	-	12.274	11.4917	14.8259	14.0581	13.1244	13.2375	16.2193	15.9668	15.316	15.1334	10.9532	10.1627
ACP5	NM_001111034	chr19	11685475	11689592	-	0.483938	3.534e-07	0.504518	3.434e-07	0.163218	0.150941	0.169768	0.145885	1.13859	0.145189	0.396667	0.163196
ACP5	NM_001111035	chr19	11685475	11689801	-	3.76889e-05	3.69e-08	4.02126e-05	3.59e-08	0.00159116	0.00134816	0.00147884	0.0013634	3.59768e-05	0.00139351	8.45e-08	0.00136364
ACP5	NM_001111036	chr19	11685475	11689801	-	0.235292	5.43821e-05	0.244278	5.28768e-05	0.231122	0.222358	0.251303	0.20844	0.320137	0.618072	5.75181e-05	0.246864
ACP5	NM_001611	chr19	11685475	11688553	-	8.02422	10.1389	7.98735	8.66408	12.7143	11.5705	13.826	13.6604	7.91121	10.2381	6.14285	6.05464
ACP6	NM_016361	chr1	147119168	147142634	-	14.6157	15.2451	11.5937	12.2778	16.4854	14.96	17.3554	17.3079	18.0151	18.5074	11.3358	10.9385
ACPL2	NM_001037172	chr3	140950682	141013486	+	4.24103	4.19222	2.36771	2.77273	2.69697	3.92153	6.18732	6.69254	8.6415	8.17001	2.77051	1.71933
ACPL2	NM_152282	chr3	140950682	141013486	+	0.999863	0.806372	1.87946	1.11419	2.47914	1.37456	1.07405	0.72514	1.55868	1.40793	1.08297	1.34
ACPP	NM_001099	chr3	132036211	132077690	+	0.101036	0.0514383	0.077063	0.0941957	0.250089	0.207065	0.601944	0.542843	1.09692	0.992662	0.129491	0.06495
ACPP	NM_001134194	chr3	132036211	132087146	+	3.75001e-05	0.0629283	0.151498	0.181119	0.0620248	0.201452	0.808433	0.422991	0.2805	0.505351	5.00917e-05	3.50448e-05
ACPT	NM_033068	chr19	51293672	51298481	+	0.0433201	0	0	0.0452549	0.048828	0.081557	0	0	0.0670134	0.0429368	0	0
ACR	NM_001097	chr22	51176652	51183727	+	0	0	0	0	0	0	0	0.0415498	0	0	0	0
ACRBP	NM_032489	chr12	6747242	6756580	-	0	0.0303886	0	0.0621845	0	0.0280649	0.0313237	0.0582964	0	0	0.0382469	0.0287732
ACRC	NM_052957	chrX	70797874	70833433	+	0.290212	0.17379	0.125778	0.0710616	0.115091	0.0803081	0.0895291	0.183495	0.105571	0.101487	0.218795	0.230479
ACRV1	NM_001612	chr11	125542229	125550793	-	0.000149161	0.155026	0.214049	0.423605	0.228473	0	0	0.247535	0.313345	0.150567	0.455061	0.195533
ACRV1	NM_020069	chr11	125542229	125550793	-	0.107111	3.9213e-06	3e-10	8.0263e-06	1.11397e-05	0	0	1.83331e-05	1.36497e-05	3.7412e-06	4.75e-08	3.97e-08
ACRV1	NM_020107	chr11	125542229	125550793	-	0	0	1.3651e-06	4.182e-07	3e-10	0.000196807	0.000222571	2.2e-09	0	0	7.773e-07	4.67122e-05
ACRV1	NM_020108	chr11	125542229	125550793	-	0	0	0.00017539	0	0	0.179977	0.26874	0	0	0	4.9911e-06	0
ACSBG1	NM_001199377	chr15	78463187	78527049	-	0	0.00939863	0.009718	0.0440724	3.358e-07	0.0575531	0.123057	0.0598931	0.0944435	0.0415158	0.0118323	0
ACSBG1	NM_015162	chr15	78463187	78527049	-	0	0.00924067	0.0095548	0.0131586	0.0410592	0.0114444	0.0116143	0.0117675	0.0189345	0.012963	0.0116332	0
ACSBG2	NM_030924	chr19	6135710	6193112	+	0.0201839	0	0.0425074	0.0420282	0	0.0189912	0	0.0394483	0	0	0	0
ACSF2	NM_025149	chr17	48503519	48552200	+	4.30956	4.1375	4.48872	3.38027	4.17826	4.26502	6.13609	7.43113	3.48512	3.87772	3.11212	2.81925
ACSF3	NM_001127214	chr16	89160217	89222171	+	2.57161	1.0877	0.516099	2.23199	0.424508	2.2925	0.376879	1.84677	1.56321	2.76986	1.18565	1.59291
ACSF3	NM_001243279	chr16	89160217	89222171	+	3.98047	5.2052	5.88673	4.34414	7.85784	4.74614	6.79318	6.07329	5.51202	5.02064	3.87756	4.54315
ACSF3	NM_174917	chr16	89160217	89222171	+	0.000895058	0.000931091	0.318406	0.0173106	0.0033272	0.753825	0.922376	0.185297	0.0027492	0.000633464	0.000976922	0.0640627
ACSF3	NR_023316	chr16	89160217	89222171	+	0.266257	0.402332	0.219917	0.352549	0.174615	0.371852	0.162578	0	0.455586	0	0.500411	0.182044
ACSF3	NR_045666	chr16	89160217	89222171	+	0.936323	0.424205	0.638838	1.09249	0.409335	1.15633	0.852238	0.818752	0.992535	0.479772	0.653156	0.830345
ACSF3	NR_045667	chr16	89202956	89222171	+	0.0964294	0.129896	0.14865	0.115713	0.102813	0.155861	0.152361	0.12973	0.186031	0.104769	0.171551	0.0593383
ACSL1	NM_001995	chr4	185676749	185747215	-	5.41479	5.23779	7.08027	7.38259	8.16241	7.66131	5.36635	4.64154	7.03766	6.07923	5.59816	5.8619
ACSL3	NM_004457	chr2	223725732	223808119	+	29.1133	30.1395	25.0212	23.0175	28.728	30.7736	39.0994	35.9314	27.9324	31.602	23.7247	22.2892
ACSL3	NM_203372	chr2	223725732	223808119	+	20.8718	17.1794	10.0771	12.5144	14.6442	14.7531	18.8584	25.0489	17.343	12.7975	11.6428	12.3769
ACSL4	NM_004458	chrX	108884564	108976621	-	14.6214	14.1938	12.2436	12.0442	13.4243	13.0276	16.5801	16.7213	15.7787	12.4918	12.4592	12.5439
ACSL4	NM_022977	chrX	108884564	108976621	-	0.852427	1.21611	1.40942	2.00975	0.45844	0.848139	0.695469	0.499992	2.75455e-05	0.971669	1.99799	1.49352
ACSL5	NM_016234	chr10	114135956	114188138	+	1.1776	1.20882	1.15096	1.29174	1.75802	1.51773	0.982686	1.0604	0.901073	0.924547	0.85634	0.913426
ACSL5	NM_203379	chr10	114133916	114188138	+	1.48548e-05	1.18935e-05	0.163391	2.66179e-05	1.74718e-05	7.5008e-06	0.0024167	8.5926e-06	2.15431e-05	5.8561e-06	1.58619e-05	7.0067e-06
ACSL5	NM_203380	chr10	114135023	114188138	+	8.1e-08	0.104005	5.2333e-06	0.133855	6.72e-08	1.156e-07	0.281515	0.183322	0.169877	0.160956	0.13487	0.174028
ACSL6	NM_001009185	chr5	131285667	131347355	-	0	0	0.00897163	4.2804e-06	2.455e-06	0	2.4235e-06	0.0355345	6.8669e-06	0.00552987	4.1207e-06	2.1861e-06
ACSL6	NM_001205247	chr5	131285667	131347355	-	0.0201913	0	3.128e-07	0.000118198	0.00016462	0.0615139	0.000151895	4.748e-06	0.000183555	0.0120578	0.000172224	0.000136056
ACSL6	NM_001205248	chr5	131285667	131347607	-	0.00022804	0	0.00975499	6.4356e-06	4.1166e-06	0.00022683	4.0302e-06	1.0473e-06	1.02841e-05	0.000219081	6.5198e-06	3.6322e-06
ACSL6	NM_001205250	chr5	131285667	131347761	-	0	0	0.00914649	4.7024e-06	2.7657e-06	0	2.725e-06	9.152e-07	7.5372e-06	0.00629457	4.5805e-06	2.4576e-06
ACSL6	NM_001205251	chr5	131285667	131347607	-	0	0	7.512e-07	0.0085856	0.0375189	0	0.0317274	0	0.0127584	0	0.0213169	0.0281806
ACSL6	NM_015256	chr5	131285667	131347355	-	0.000121658	0	0.00897163	4.2804e-06	2.455e-06	0.000103444	2.4235e-06	0.0355345	6.8669e-06	0.000124932	4.1207e-06	2.1861e-06
ACSM1	NM_052956	chr16	20634559	20702578	-	0	0	0	0	0	0	0	0	0	0	0	0
ACSM2A	NM_001010845	chr16	20462859	20498991	+	0	0	0	0	0	0	0	0	0	0	0	0
ACSM2B	NM_001105069	chr16	20548083	20587695	-	0	0	0	0	0	0	0	0	0	0	0	0
ACSM2B	NM_182617	chr16	20548083	20587695	-	0	0	0	0	0	0	0	0	0	0	0	0
ACSM3	NM_005622	chr16	20775312	20808479	+	0	2.2e-09	0	0	0.0293533	0	0.0931748	0	1.9e-09	0	0	0.0251744
ACSM3	NM_202000	chr16	20775312	20797638	+	0.0730262	0.0372257	0.0385372	0.0381058	0	0.137465	0.0230006	0.0356931	0.0564748	0	0.046845	0
ACSM4	NM_001080454	chr12	7456928	7480969	+	0	0	0	0	0	0	0	0	0	0	0	0
ACSM5	NM_017888	chr16	20420856	20452281	+	0.319164	0.13931	0.264161	0.166209	0.205066	0.386125	0.669954	0.423306	0.24675	0.112948	0.146136	0.153928
ACSS1	NM_001252675	chr20	24986866	25038818	-	4.717e-07	4.63798e-05	0.000122951	2.54391e-05	9.5541e-05	0.276252	1.90354e-05	5.67053e-05	0.49486	0.000106456	3.1829e-06	5.011e-07
ACSS1	NM_001252676	chr20	24986866	25013342	-	1.00785e-05	0	0	8e-10	0	0	0	0.0863537	0.174055	0	2e-10	0.0396636
ACSS1	NM_001252677	chr20	24986866	25038818	-	3.09324e-05	9.901e-07	0.186474	0.171396	0.226025	3.76429e-05	0.0621624	0.439754	4.489e-06	0.580712	5.09102e-05	0.00579686
ACSS1	NM_032501	chr20	24986866	25038818	-	1.22898	1.34024	1.52654	1.07638	2.13825	1.59624	1.64742	1.49178	0.765452	1.23319	1.42493	1.14362
ACSS2	NM_001076552	chr20	33464328	33515769	+	2.63022e-05	2.87e-06	1.30213e-05	3.75739e-05	2.6778e-06	6.5805e-06	2.59197e-05	0.201536	5.76536e-05	1.91951e-05	4.44753e-05	2.04534e-05
ACSS2	NM_001242393	chr20	33462766	33515769	+	2.019e-07	9.5788e-06	1.0809e-06	1.8721e-06	2.63763e-05	1.06386e-05	2.5e-09	2.36489e-05	5.9021e-06	2.373e-07	0	1.575e-07
ACSS2	NM_018677	chr20	33464328	33515769	+	5.00726	5.58176	5.00193	4.41287	5.29853	5.55374	5.69366	5.4923	5.65076	4.74406	4.61437	4.72327
ACSS3	NM_024560	chr12	81471809	81649582	+	1.8649	1.73434	1.83099	2.01562	2.23673	1.99083	3.3482	2.89121	2.99415	2.55848	1.5169	1.31428
ACTA1	NM_001100	chr1	229566993	229569843	-	0	0.0393777	0	0	0	0	0	0	0	0	0	0
ACTA2	NM_001141945	chr10	90694831	90751147	-	2.00663	0.873249	1.66044	2.08222	7.5499	4.04858	15.0452	18.3067	5.97979	8.15315	1.63909	1.10885
ACTA2	NM_001613	chr10	90694831	90712580	-	0.609821	0.948061	0.750513	0.780639	1.85864	4.39246	12.5437	11.5426	5.71055	3.56011	0.0703506	0.733908
ACTB	NM_001101	chr7	5566779	5570232	-	705.263	701.195	875.468	877.91	827.497	761.188	515.586	506.868	576.776	532.253	680.702	720.074
ACTBL2	NM_001017992	chr5	56775843	56778636	-	0.312903	0.179214	0.51478	0.40718	0.659422	0.680824	1.72352	1.50975	1.51183	1.14327	0.200543	0.245196
ACTC1	NM_005159	chr15	35080297	35087927	-	0.0437566	0	0	0.0151731	0.0819196	0.0274444	0.0305887	0.0285034	0.0225484	0.0144511	0.0186912	0
ACTG1	NM_001199954	chr17	79476997	79479892	-	11.6715	11.4312	15.214	14.3046	11.0811	7.41582	9.80902	9.32513	7.42281	8.62641	14.8236	15.7362
ACTG1	NM_001614	chr17	79476997	79479892	-	799.926	840.082	1060.71	1039.98	787.063	748.771	497.281	484.807	615.532	615.934	961.32	977.106
ACTG1	NR_037688	chr17	79476997	79479892	-	208.069	211.113	236.723	258.264	204.47	189.319	120.569	92.3038	148.224	153.366	210.553	219.772
ACTG1P4	NR_024438	chr1	104112026	104114008	+	0.0564768	0.0287716	0	0	0	0	0	0.0551992	0	0	0	0
ACTG2	NM_001199893	chr2	74120093	74146780	+	0.0492918	0	0.0521151	0	0	0	0	0	0	0	0	0.0475965
ACTG2	NM_001615	chr2	74120093	74146780	+	3.07683e-05	0	3.56261e-05	0	0	0	0	0	0	0	0	2.82821e-05
ACTL10	NM_001024675	chr20	32254304	32256331	+	3.52762	3.14479	4.67713	3.96391	3.53461	4.12362	3.00978	3.60939	4.21916	4.12382	2.57991	3.48304
ACTL6A	NM_004301	chr3	179280708	179306193	+	27.0342	26.0449	34.7647	32.0297	34.1484	36.3811	23.0951	21.3768	30.6934	29.4951	26.4055	28.6564
ACTL6A	NM_177989	chr3	179280708	179306193	+	7.76692	6.23368	7.22349	7.42331	7.88208	5.35028	4.89457	4.75186	8.05336	7.2891	7.00015	6.79309
ACTL6A	NM_178042	chr3	179280708	179306193	+	0.0472423	0.0946317	0.299325	0.144062	0.217278	4.7356e-06	4.302e-06	0.192759	7.9199e-06	4.0399e-06	5.4372e-06	0.0458423
ACTL6B	NM_016188	chr7	100240726	100254084	-	0	0.0382575	0	0	0	0	0	0	0	0	0	0.0362138
ACTL7A	NM_006687	chr9	111624603	111626035	+	0.0808046	0.0412028	0	0.126566	0.0455233	0	0	0	0	0	0	0.0389978
ACTL7B	NM_006686	chr9	111616869	111618275	-	0	0	0	0	0	0	0	0	0	0	0	0
ACTL8	NM_030812	chr1	18081808	18153558	+	1.3314	1.35675	2.42503	1.38821	1.70267	1.48079	0.667476	1.15346	2.0122	2.12903	1.28069	2.0437
ACTL9	NM_178525	chr19	8807751	8809172	-	0	0	0.0430383	0	0.0918417	0.115081	0.300002	0.199208	0.0630392	0.0807828	0	0.0393372
ACTN1	NM_001102	chr14	69340840	69446083	-	42.6213	43.798	60.3806	57.2221	65.1549	62.0999	61.3778	62.6345	62.6076	59.5569	45.3862	46.4855
ACTN1	NM_001130004	chr14	69340840	69446083	-	0.000679184	0.0444925	0.000329342	0.661315	0.000410195	0.000240271	1.66736	0.656217	0.00301856	0.00113061	0.000195759	0.61266
ACTN1	NM_001130005	chr14	69340840	69446083	-	0.876041	0.442971	1.84534	1.3547	0.712142	1.20889	0.00737807	0.950574	1.03559	1.40006	0.851696	0.0571968
ACTN1-AS1	NR_073422	chr14	69446399	69454180	+	0	0	0	0	0.132461	0.109815	0	0	0.180505	0	0	0
ACTN2	NM_001103	chr1	236849770	236927558	+	0.0117998	0.0480308	0.0744631	0.0368102	0.0397508	0.0777051	0.0371082	0.0345871	0.0182406	0.0584528	0.060476	0.0227536
ACTN3	NM_001104	chr11	66314312	66330799	+	0	0	0.0194521	0	0	0.0173825	0	0	0	0.018308	0	0
ACTN3	NM_001258371	chr11	66313866	66330799	+	0	0	6.68346e-05	0	0	6.20021e-05	0	0	0	6.28259e-05	0	0
ACTN4	NM_004924	chr19	39138267	39221171	+	123.661	143.013	147.57	142.695	130.783	121.719	118.605	128.592	119.46	112.359	116.74	113.481
ACTR10	NM_018477	chr14	58666833	58702353	+	8.66991	8.34697	8.96605	9.26482	11.7282	11.026	9.59687	10.3042	9.60036	10.9847	8.33628	9.10312
ACTR1A	NM_005736	chr10	104238986	104262512	-	49.5771	50.2268	47.5182	45.5986	55.5057	53.3461	48.1073	45.9974	48.0574	46.2256	42.1538	44.6272
ACTR1B	NM_005735	chr2	98272402	98280561	-	19.3895	20.0001	20.766	19.1004	21.8336	20.6242	20.9467	19.3093	18.824	18.6782	15.3883	16.36
ACTR2	NM_001005386	chr2	65454829	65498390	+	0.200779	0.30365	0.491332	0.193966	0.10739	0.0888973	0.419274	0.100615	0.794314	0.203775	3.64172e-05	0.184328
ACTR2	NM_005722	chr2	65454829	65498390	+	46.3462	49.3147	46.6899	48.749	53.8816	54.5797	47.1346	52.3808	47.8881	43.1177	42.7784	41.1841
ACTR3	NM_005721	chr2	114647537	114716167	+	53.1644	53.9094	50.3076	52.7244	51.7051	51.4093	45.2994	44.0045	49.7441	47.3183	53.9452	53.8647
ACTR3B	NM_001040135	chr7	152456834	152552464	+	0.448779	0.473568	0.382284	0.527235	0.546892	0.000356451	0.30456	0.0011885	0.00553353	0.503353	1.70765	1.03952
ACTR3B	NM_020445	chr7	152456834	152552464	+	2.50057	1.63518	2.4659	1.21189	1.07362	1.08749	1.68093	2.03922	3.07854	2.78494	1.20261	1.27727
ACTR3B	NR_073000	chr7	152456834	152552464	+	9.32497e-05	1.1366	4.01566e-05	1.18998	1.01081	1.16188	0.935502	0.861759	0.4511	1.20804e-05	1.26214	0.693702
ACTR3B	NR_073001	chr7	152456834	152552464	+	0	8.986e-07	0	1.398e-07	9.6e-09	0	0	0	0	9.7e-09	5.0894e-06	8e-10
ACTR3BP2	NR_027714	chr2	92129159	92130496	+	0	0	0	0	0	0	0	0	0	0	0	0
ACTR3BP5	NR_045000	chr10	38989727	38991371	+	0	0	0	0	0	0	0	0	0	0	0	0
ACTR3C	NM_001164458	chr7	149944301	150020758	-	1.46479e-05	0.000146931	0.000148751	0.00014769	0.000155667	0.000134441	0.000150039	0.00014137	0.00021454	0.000137666	0.000174395	0.000136259
ACTR3C	NM_001164459	chr7	149944301	150000069	-	0.436821	0.387825	0.384706	0.456539	0.410404	0.220713	0.306364	0.300423	0.525423	0.45691	0.280215	0.304478
ACTR5	NM_024855	chr20	37377097	37401089	+	4.81925	4.93064	7.48555	7.84068	6.89156	8.00357	3.63595	4.73137	5.6316	6.29371	6.7477	6.23357
ACTR6	NM_022496	chr12	100593865	100618202	+	0.215822	1.07183	0.417057	0.182013	0.261366	0.157671	0.420318	0.549062	0.287135	0.329033	0.398159	0.361248
ACTR6	NR_048568	chr12	100594555	100618202	+	3.9505	2.54406	3.49494	3.07729	2.84817	3.94221	3.64467	2.56189	4.71056	2.76976	3.43416	3.83759
ACTR6	NR_048569	chr12	100594555	100618202	+	13.991	15.7779	14.3104	15.9395	15.9143	15.0422	10.1858	10.2104	13.6783	13.12	15.3575	15.97
ACTR8	NM_022899	chr3	53901094	53916229	-	11.9463	10.7078	12.5857	12.1498	13.3363	13.8674	12.9012	12.5295	11.5083	13.3967	11.1963	11.1326
ACTRT1	NM_138289	chrX	127184941	127186382	-	0	0	0	0	0	0	0	0	0	0	0	0
ACTRT2	NM_080431	chr1	2938046	2939467	+	0	0	0	0	0	0	0	0	0	0	0	0
ACTRT3	NM_032487	chr3	169484711	169487683	-	1.73182	1.053	1.35448	1.13546	1.31991	1.07772	1.31999	0.98282	1.25266	1.05184	1.36117	1.69775
ACVR1	NM_001105	chr2	158592958	158731623	-	4.21231e-05	0.381204	2.91787e-05	1.48588e-05	0.426509	1.22979e-05	2.11827e-05	0.239117	6.53823e-05	1.65125e-05	5.2534e-05	2.3922e-05
ACVR1	NM_001111067	chr2	158592958	158732374	-	1.08586	0.951084	1.46416	1.80462	1.17217	1.54152	1.55893	1.56931	1.67884	2.24627	1.14765	1.084
ACVR1B	NM_004302	chr12	52345451	52390863	+	3.02507	2.41649	1.98393	3.33232	3.46823	3.56211	2.77475	3.46415	3.16973	3.53629	2.40591	3.46269
ACVR1B	NM_020327	chr12	52347164	52390863	+	0.00254305	1.00055	1.58444	0.00219693	0.745304	0.00520426	0.137587	0.000142136	0.764483	0.00500006	0.481651	0.00147116
ACVR1B	NM_020328	chr12	52345451	52390863	+	0.299518	0	0.197631	0	0	0	0.331003	0.100572	0	0.164597	0.201134	0
ACVR1C	NM_001111031	chr2	158383279	158454072	-	0	0.0118394	4.4195e-06	0.000251096	0	6.724e-07	0.0373281	2.8262e-06	0.0458007	0.0352973	0	4.2247e-06
ACVR1C	NM_001111032	chr2	158383279	158485399	-	0	0	7.03592e-05	0.00605144	0	1.2679e-06	0	7.04492e-05	0	0	0	6.63249e-05
ACVR1C	NM_001111033	chr2	158383279	158485399	-	0	0	0.0130674	0	0	0	0	0.0304726	0	0	0	0.0119837
ACVR1C	NM_145259	chr2	158383279	158485399	-	0	0.000352027	3.589e-07	1.39945e-05	0	0.0333875	0.000349996	1.528e-07	0.000523624	0.000333039	0	3.473e-07
ACVR2A	NM_001616	chr2	148602570	148688393	+	1.00378	1.33084	1.47129	1.38084	1.45707	1.2972	1.56213	1.5949	1.81808	1.40632	1.40294	1.26099
ACVR2B	NM_001106	chr3	38495790	38534633	+	1.52687	1.46407	1.2467	1.34529	1.44479	1.68021	1.15276	1.33977	1.52827	1.44882	1.19636	1.41543
ACVR2B-AS1	NR_028389	chr3	38492518	38496311	-	0.240362	0.155771	0.322205	0.318575	0.245665	0.185045	0.206382	0.234894	0.371646	0.281472	0.33615	0.316142
ACVRL1	NM_000020	chr12	52301202	52317145	+	2.6042e-06	2.32283e-05	1.80055e-05	1.46935e-05	4.7493e-06	0.105089	0.107375	3.926e-06	3.8246e-06	4.5557e-06	0.0314498	0.000104231
ACVRL1	NM_001077401	chr12	52306113	52317145	+	0.168928	0.343822	0.273372	0.243254	0.467007	0.294712	0.583726	0.584049	0.361585	0.218863	0.100673	0.150246
ACY1	NM_000666	chr3	52017300	52023218	+	24.823	25.1689	26.0288	25.6535	33.9536	31.1583	30.5685	30.9205	34.2268	33.4021	19.5919	20.5103
ACY1	NM_001198895	chr3	52017300	52023218	+	0.324693	0.514892	0.286491	0.814045	0.44779	0.27371	0.300674	0.611409	0.469453	3.3329e-06	0.394485	0.573093
ACY1	NM_001198896	chr3	52017300	52023218	+	0.348221	0.352211	0.121228	4.1e-09	0.125158	0.0979851	0.271566	0.121075	0	8.71e-08	4e-10	2.36e-08
ACY1	NM_001198897	chr3	52017300	52023218	+	0.532276	1.25915	1.12294	0.489008	0.703797	1.01911	2.14664	6.3685e-05	1e-10	0.96113	1.92794	0.512338
ACY1	NM_001198898	chr3	52017300	52023218	+	2.15276	0.651982	2.26055	1.12573	0.775954	0.935734	1.26474	0.494863	1.25117	2.31615	1.67311	0.192115
ACY3	NM_080658	chr11	67410026	67418130	-	0	0	0.0476581	0	0.10169	0	0.0474514	0	0.13954	0	0	0.0435403
ACYP1	NM_001107	chr14	75519928	75530736	-	7.47684	9.19226	9.99933	9.65396	13.8722	13.243	8.13419	8.67035	7.00805	7.61096	6.27906	10.7068
ACYP1	NM_203488	chr14	75519928	75530736	-	1.81679	1.06381	1.15227	1.54626	2.13788	2.13068	1.84998	0.915762	1.57921	2.31339	2.80772	1.35108
ACYP2	NM_138448	chr2	54342410	54532435	+	1.30682	1.23474	1.22807	1.771	2.56561	1.59479	3.4641	2.88683	1.79715	1.967	1.42911	1.16832
ADA	NM_000022	chr20	43248163	43280376	-	4.38692	3.89942	5.69938	6.06612	6.41941	7.27	7.41033	7.33074	6.61142	6.09431	3.55994	3.69112
ADAD1	NM_001159285	chr4	123300595	123350947	+	0	0	0	0	0	0	0	0	0	0	0	0
ADAD1	NM_001159295	chr4	123300595	123350947	+	0	0	0	0	0	0	0	0	0	0	0	0
ADAD1	NM_139243	chr4	123300121	123350947	+	0	0	0	0	0	0	0	0	0	0	0	0
ADAD2	NM_001145400	chr16	84224723	84230772	+	0	0	0	0	0	0	0	0	0	0	0	0
ADAD2	NM_139174	chr16	84224723	84230772	+	0	0	0	0	0	0	0	0	0	0	0	0
ADAL	NM_001012969	chr15	43622872	43641615	+	1.95401	1.94137	1.6927	1.16838	1.96925	2.0278	2.66524	2.61928	1.7799	1.35105	2.29284	2.59563
ADAL	NM_001159280	chr15	43622872	43646096	+	2.25325	2.69086	1.81995	2.3223	2.73516	2.57263	2.69358	2.50877	2.90739	2.30448	2.44901	2.84193
ADAM10	NM_001110	chr15	58888510	59042177	-	25.514	26.566	24.2079	23.5073	26.1368	27.4269	30.4806	30.811	31.3848	30.3342	24.2796	24.7332
ADAM11	NM_002390	chr17	42836568	42859214	+	0.291598	0.408025	0.370604	0.328506	0.382034	0.262895	0.254739	0.225554	0.187821	0.192601	0.404767	0.386581
ADAM12	NM_003474	chr10	127702902	128077127	-	0.17897	0.273992	0.364756	0.238801	0.209278	0.254073	0.645377	0.545654	0.30684	0.28899	0.270982	0.205794
ADAM12	NM_021641	chr10	127729913	128077127	-	0.243825	0.048737	0.351128	0.437328	0.471885	0.266904	0.0857627	0.537292	0.542066	0.696552	0.0744468	0.220362
ADAM15	NM_001261464	chr1	155023748	155035252	+	1.3219	0.580825	1.58795	0.923236	1.04162	1.5243	0.602859	0.305812	0	0.923289	0.437813	0.780957
ADAM15	NM_001261465	chr1	155023748	155035252	+	0.000134679	3.7e-08	0.142232	1.0956e-05	0.0271016	0.160126	0	7.32487e-05	1.3e-09	0	2e-09	0
ADAM15	NM_001261466	chr1	155023748	155031159	+	1.10785	1.73455	1.19471	0.954301	0.661587	0.805579	0.522181	0.969663	0.778626	1.20241	1.96247	0.822024
ADAM15	NM_003815	chr1	155023748	155035252	+	41.5754	40.2472	45.294	43.5176	43.4972	42.1969	29.889	31.7863	40.1983	40.4123	41.7558	39.2801
ADAM15	NM_207191	chr1	155023748	155035252	+	0.704055	0.841543	1.35573	0.871909	0.176956	0	1.93642	2.68233	1.82857	0.754555	0.000242191	0.000414021
ADAM15	NM_207194	chr1	155023748	155035252	+	1.0252	1e-10	0.00161418	0.602771	0.0597394	0	2e-10	0.116683	1.1288	0	0	1.334e-07
ADAM15	NM_207195	chr1	155023748	155035252	+	0.912333	2.58859	2.54596	1.03803	4.54012	2.41417	2.6249	0.1675	0.756225	2.13715	1.90752	1.99502
ADAM15	NM_207196	chr1	155023748	155035252	+	0.00114208	0.450534	6.0961e-06	0	0.0987997	0.770835	0	1.676e-07	0.0149706	0.444543	0.000255865	0.827677
ADAM15	NM_207197	chr1	155023748	155035252	+	0.464179	0.439207	0.849628	0.01867	0.150358	0	0.00329847	0.526167	1.01657e-05	0.179978	3e-10	1.27778e-05
ADAM15	NR_048577	chr1	155023748	155035252	+	0	0.000202847	1.57265e-05	0	0.598398	0.0320988	0	0	0.935898	0.102984	0.732898	0.0973995
ADAM15	NR_048578	chr1	155023748	155035252	+	0	0.000195421	1.20806	0	0.857858	0	1.04865	7.38e-08	0.000967479	0.0438927	2.1734e-06	0.577641
ADAM15	NR_048579	chr1	155023748	155035252	+	2.02628	2.43729	0.167379	1.63925	0.516552	2.04269	0.162476	1.27255	8e-10	2.34641	1.79395	1.67944
ADAM17	NM_003183	chr2	9629411	9695917	-	17.9203	17.7461	17.0191	15.4206	18.2035	19.2601	20.0346	20.5375	18.1251	18.8085	16.718	15.933
ADAM18	NM_001190956	chr8	39442087	39469094	+	0	0	0	0	0	0	0.0420564	0	0	0	0	0
ADAM18	NM_014237	chr8	39442087	39587583	+	0	0	0	0	0	0	0	0	0	0	0	0
ADAM19	NM_033274	chr5	156904312	157002783	-	6.18238	6.27303	10.263	10.1213	11.9654	12.5675	21.2979	22.2081	29.0344	27.8933	6.51987	6.14864
ADAM1A	NR_036636	chr12	112336867	112339706	+	0.442089	0.371848	0.384509	0.320145	0.302444	0.144681	0.120994	0.187831	0.267463	0.361859	0.418842	0.556131
ADAM2	NM_001464	chr8	39601255	39695779	-	0	0	0	0	0	0	0	0	0	0	0	0
ADAM20	NM_003814	chr14	70989078	71001732	-	0	0	0	0	0	0	0.0205337	0.0573757	0	0.0387843	0	0
ADAM20P1	NR_037933	chr14	70935596	70950473	-	0.0716523	0.0182371	0	0	0.0201297	0.0337077	0.037581	0	0	0.0177487	0	0.0172751
ADAM21	NM_003813	chr14	70918874	70926622	+	0.0514256	0.0837862	0.108309	0.0856701	0.0693688	0.116129	0.194257	0.301527	0.0636094	0.0611466	0.0791062	0.0396794
ADAM21P1	NR_003951	chr14	70712470	70714518	-	0.0136269	0	0	0	0.0613204	0	0.0572363	0.0266367	0.0421447	0	0	0
ADAM22	NM_004194	chr7	87563566	87811428	+	0.0511765	0	0	0	0	0.0215519	0	0.0576281	0	0	0.032329	0
ADAM22	NM_016351	chr7	87563566	87832204	+	0.24755	0.447096	0.267926	0.353189	0.391139	0.298798	0.346257	0.209336	0.309025	0.434123	0.308583	0.375027
ADAM22	NM_021721	chr7	87563566	87811428	+	1.79093	1.2591	1.5855	1.66359	1.88588	2.54191	1.82996	2.21747	1.93477	1.97155	1.93885	1.70256
ADAM22	NM_021722	chr7	87563566	87832204	+	0.105011	0	0.312581	0.0772337	0.162004	0.159636	0.161887	0.23184	0.264584	0.056099	0.0472515	0.146988
ADAM22	NM_021723	chr7	87563566	87832204	+	0.0861117	8.74539e-05	0.000110335	2.97423e-05	4.92985e-05	0.0731098	7.78525e-05	0.0715136	7.81158e-05	3.85008e-05	0.0940619	7.47186e-05
ADAM23	NM_003812	chr2	207308368	207482679	+	1.92525	2.196	1.53873	1.31728	1.94311	2.2978	4.88054	5.34779	4.4097	4.39804	1.69077	1.51285
ADAM28	NM_014265	chr8	24151580	24212726	+	0	0	0	0	0	0	0	0	0	0	0	0
ADAM28	NM_021777	chr8	24151580	24193612	+	0	0	0	0	0	0	0	0	0	0	0	0
ADAM29	NM_001130703	chr4	175839509	175899331	+	0	0	0	0	0	0	0	0	0	0	0	0
ADAM29	NM_001130704	chr4	175839509	175899331	+	0	0	0	0	0	0	0	0	0	0	0	0
ADAM29	NM_001130705	chr4	175839509	175899331	+	0	0	0	0	0	0	0	0	0	0	0	0
ADAM29	NM_014269	chr4	175839509	175899331	+	0	0	0	0	0	0	0	0	0	0	0	0
ADAM30	NM_021794	chr1	120436156	120439147	-	0	0	0	0	0	0	0	0	0	0	0	0
ADAM32	NM_145004	chr8	38965050	39142436	+	0.160529	0.102162	0.190164	0.229802	0.18044	0.132163	0.084216	0.117654	0.0930748	0.198826	0.385828	0.193531
ADAM33	NM_025220	chr20	3648620	3662738	-	0	0	0	0.000291778	0	0	0	0	0	0	0	0
ADAM33	NM_153202	chr20	3648620	3662738	-	0	0	0	0.0323808	0	0	0	0	0	0	0	0
ADAM3A	NR_001569	chr8	39308564	39380508	-	0	0	0	0	0	0	0	0	0	0	0	0
ADAM3A	NR_024106	chr8	39308564	39380508	-	0	0	0	0	0	0	0	0	0	0	0	0
ADAM3A	NR_024107	chr8	39308564	39380508	-	0	0	0	0	0	0	0	0	0	0	0	0
ADAM3A	NR_073423	chr8	39308564	39380508	-	0	0	0	0	0	0	0	0	0	0	0	0
ADAM5	NR_001448	chr8	39172182	39260375	+	0	0	0	0	0	0	0	0	0	0	0	0
ADAM6	NR_002224	chr14	106435819	106438358	-	0	0	0	0	0	0	0	0	0	0	0	0
ADAM7	NM_003817	chr8	24298509	24367077	+	0	0	0	0	0	0	0	0	0	0	0	0
ADAM8	NM_001109	chr10	135075920	135090407	-	0.191043	0.267088	5.46859e-05	0.177015	0.275582	0.288095	5.67675e-05	0.0679881	3.10714e-05	5.34729e-05	4.6e-09	0.343526
ADAM8	NM_001164489	chr10	135075920	135090407	-	3.67885e-05	5.237e-07	0.346396	0.00117463	0.000918654	0.200943	0.461273	0.209469	0.34806	0.480549	0.000170102	2.408e-07
ADAM8	NM_001164490	chr10	135075920	135090407	-	0.0961278	9.59959e-05	0	0.0853318	3.96e-08	7.1304e-05	0.0303646	0.182275	8.77906e-05	9e-10	0.184011	0.00490711
ADAM9	NM_003816	chr8	38854505	38962779	+	44.7886	47.5646	43.988	42.807	48.5353	48.9902	48.7358	50.727	43.5853	44.7293	45.5657	44.3927
ADAM9	NR_027638	chr8	38854505	38962779	+	1.72905e-05	1.41504e-05	5.8679e-06	1.43545e-05	0.191702	7.4645e-06	1.396e-07	1.7971e-05	0.308655	0.375966	2.27858e-05	9.372e-06
ADAM9	NR_027639	chr8	38854505	38962779	+	0.303015	3.3534e-06	1.06529e-05	5.7289e-06	0.114642	1.21091e-05	4.01358e-05	0.0606933	0.0812862	0.0534271	0.068947	1.24412e-05
ADAM9	NR_027878	chr8	38854505	38962779	+	0.464677	0.161292	0.350601	5.2372e-06	0.2993	0.2521	1.4193e-06	0.241888	0.23052	0.405061	0.394555	0.336314
ADAMDEC1	NM_001145271	chr8	24241798	24263526	+	0	0	0	0	0	0	0	0	0	0	0	0
ADAMDEC1	NM_001145272	chr8	24241798	24263526	+	0	0	0	0	0	0	0	0	0	0	0	0
ADAMDEC1	NM_014479	chr8	24241798	24263526	+	0	0	0	0	0	0	0	0	0	0	0	0
ADAMTS1	NM_006988	chr21	28208606	28217728	-	4.99243	4.8584	4.20048	3.66366	3.02849	3.1311	4.25879	4.56388	5.16274	4.27535	3.2204	3.69582
ADAMTS10	NM_030957	chr19	8645126	8675588	-	0.0884883	0.0900535	0.106377	0.0525866	0.141966	0.118925	0.0530107	0.111162	0.0781669	0.0500974	0.0647914	0.0609424
ADAMTS12	NM_030955	chr5	33527287	33892124	-	7.17161	7.83353	6.73892	6.65145	6.91742	5.90709	7.56205	9.06593	5.88371	5.39012	6.24045	6.67585
ADAMTS13	NM_139025	chr9	136287120	136324508	+	0.0409539	0.0284674	3.231e-07	6.71e-08	4.2e-09	0	6.9e-09	3.5e-08	6.28e-08	1.81e-08	0.0685786	8.76e-08
ADAMTS13	NM_139026	chr9	136287120	136324508	+	1.0655e-06	2.975e-07	0.0136294	2.555e-07	6.9e-09	0.0446111	0.119429	0.0420555	2.697e-07	0.0625846	3.3247e-06	0.0248187
ADAMTS13	NM_139027	chr9	136287120	136324508	+	4.818e-07	1.752e-07	0.000286115	1.573e-07	5.7e-09	0.000250397	0.000283118	0.000261887	1.589e-07	0.000265296	1.1259e-06	0.00026112
ADAMTS13	NR_024514	chr9	136279459	136324508	+	0.11371	0.2128	0.0740775	0.0190678	0.0823528	0.0314427	0	0.146928	0.056648	0.0988399	0.0714378	0.0657584
ADAMTS14	NM_080722	chr10	72432559	72522195	+	0	0	0	0	0	0	0	0	0	0	0	0
ADAMTS14	NM_139155	chr10	72432559	72522195	+	0	0	0	0	0	0	0	0	0	0	0	0
ADAMTS15	NM_139055	chr11	130318869	130346539	+	0.859801	0.89381	2.03398	1.76807	1.62618	1.84624	2.11555	1.99964	1.95024	1.74067	1.16139	1.04514
ADAMTS16	NM_139056	chr5	5140443	5320412	+	0.460419	0.522971	0.608035	0.701343	0.721326	0.564082	0.572372	0.533537	0.446895	0.594058	0.781961	0.495513
ADAMTS17	NM_139057	chr15	100511643	100882183	-	0.225566	0.186986	0.237127	0.173659	0.196927	0.28292	0.131315	0.138755	0.21953	0.14898	0.246156	0.217452
ADAMTS18	NM_199355	chr16	77316025	77469011	-	0	0	0	0.00931423	0.0100591	0	0.00939058	0	0	0	0	0
ADAMTS19	NM_133638	chr5	128796103	129074376	+	0.0104578	0	0	0.021745	0	0.019676	0.0219221	0	0.0323314	0	0	0
ADAMTS2	NM_014244	chr5	178537852	178772431	-	0	3.27e-08	2.66e-08	0	0.0087757	0.00735495	0.0114973	0.0363084	0	3.6e-09	0	0
ADAMTS2	NM_021599	chr5	178577886	178772431	-	0	0.0277956	0.0287573	0	0	0	0.0743892	0.0599104	0	0.108142	0	0.0263206
ADAMTS20	NM_025003	chr12	43748012	43945724	-	0.185003	0.112936	0.175058	0.18269	0.249219	0.139228	0.252044	0.38861	0.142985	0.229106	0.319966	0.205107
ADAMTS3	NM_014243	chr4	73146686	73434516	-	0.673758	0.842972	0.670073	0.520521	0.603028	0.462511	0.887365	1.00519	1.01332	1.21774	0.781513	0.912867
ADAMTS4	NM_005099	chr1	161159538	161168845	-	0.59709	0.684467	0.680021	0.745804	0.610417	0.720557	0.362622	0.452636	0.496523	0.3937	0.680652	0.667019
ADAMTS5	NM_007038	chr21	28290231	28339439	-	0.04341	0.0331154	0.02851	0.0112746	0.0182661	0.0255208	0.0625264	0.0795161	0.0251609	0.0591316	0.0139006	0.0418436
ADAMTS6	NM_197941	chr5	64444563	64777704	-	0.616557	0.737893	0.831036	0.618094	0.700117	0.798327	1.4744	1.55195	1.44633	1.48752	0.696887	0.615329
ADAMTS7	NM_014272	chr15	79051545	79103773	-	0.554503	0.472341	0.627096	0.673614	0.738326	0.755154	1.13524	1.66937	0.672754	0.804872	0.458459	0.438234
ADAMTS8	NM_007037	chr11	130274818	130298539	-	0	0	0.0154781	0.0306063	0.0165243	0.0138396	0.0308508	0.0143736	0	0.0437242	0	0
ADAMTS9	NM_182920	chr3	64501331	64673365	-	0.14418	0.12467	0.174277	0.187283	0.218452	0.230566	0.249256	0.239461	0.356573	0.364236	0.129285	0.201532
ADAMTS9-AS2	NR_038264	chr3	64670546	64997143	+	0	0.0507257	0	0	0.0280034	0	0.104555	0.0486684	0.0385015	0	0	0
ADAMTSL1	NM_001040272	chr9	18474079	18910947	+	1.19716	1.54031	1.56075	1.55533	2.12988	2.12441	2.43762	2.82367	2.6753	2.32448	1.77085	1.69599
ADAMTSL1	NM_052866	chr9	18474079	18684952	+	1.69486	1.35393	2.09053	1.1853	1.28777	1.59178	2.21139	2.46809	1.57928	2.38491	1.61314	0.949051
ADAMTSL2	NM_001145320	chr9	136397286	136440641	+	0.019781	0	1.60516e-05	0	0	0	0.0138261	1.51217e-05	0	0	0	1.51418e-05
ADAMTSL2	NM_014694	chr9	136399975	136440641	+	0	0	0.0151868	0	0	0	0	0.0282232	0	0	0	0.0139176
ADAMTSL3	NM_207517	chr15	84322838	84708593	+	0.452712	0.526322	0.498495	0.448039	0.370983	0.371779	0.308689	0.386122	0.288787	0.306117	0.441843	0.484897
ADAMTSL4	NM_019032	chr1	150521898	150533412	+	0.969228	1.05133	1.20738	1.07433	1.3034	1.48779	2.04567	2.47973	0.975022	0.878171	0.539286	0.700922
ADAMTSL4	NM_025008	chr1	150521898	150531223	+	7.82163e-05	2.4831e-06	4.54499e-05	6.93797e-05	6.6407e-06	1.06784e-05	9.36492e-05	0.000100634	0.307333	0.252159	5.1082e-06	1.09758e-05
ADAMTSL5	NM_213604	chr19	1505017	1513188	-	0.401106	0.447294	0.48263	0.338007	0.386403	0.431311	0.541039	0.298637	0.442964	0.227104	0.19586	0.331576
ADAP1	NM_006869	chr7	937537	994289	-	0.690734	0.727803	0.326219	0.347358	0.321415	0.336189	0.650035	0.698327	0.405125	0.377627	0.641294	0.436534
ADAP2	NM_018404	chr17	29248754	29286211	+	0	0.0405177	0	0.0207134	0	0.0374403	0.020875	0	0.0307616	0	0	0.0383776
ADAR	NM_001025107	chr1	154554534	154600456	-	21.2952	20.1672	23.9847	24.3049	25.2543	25.7824	22.9322	24.4491	22.498	21.2735	22.1494	22.7975
ADAR	NM_001111	chr1	154554534	154580724	-	1.42848	2.51406	1.92937	0.00239082	2.26483	0.00384979	1.6696	1.71644	1.16442	3.00938	0.0044833	0.000382442
ADAR	NM_001193495	chr1	154554534	154578776	-	0.917504	1.17547	0.52592	0.4887	0.542096	0.635401	0.325862	1.60334	2.05272	1.25752	0.226774	0.31664
ADAR	NM_015840	chr1	154554534	154580724	-	4.39483	5.27493	5.42783	7.27418	4.93906	4.69634	3.44984	2.65236	4.55692	3.16398	5.42694	6.04726
ADAR	NM_015841	chr1	154554534	154580724	-	0.844058	0.69921	1.07822	0.669105	0.621069	1.08774	0.611596	1.0353	0.464062	0.611425	0.806111	2.44e-08
ADARB1	NM_001112	chr21	46494493	46646478	+	0.0035553	3.83788e-05	8.1214e-05	2.5064e-05	0.000151159	0.000132933	0.000168129	0.0015638	0.000240093	5.23899e-05	9.73488e-05	0.00010515
ADARB1	NM_001160230	chr21	46494493	46646478	+	0.0015129	5.32e-08	6.112e-07	3.85e-08	6.8503e-06	1.3627e-06	3.1893e-06	0.000390589	8.1178e-06	2.476e-07	1.449e-07	7.1986e-06
ADARB1	NM_015833	chr21	46494493	46646478	+	0.104627	0.169059	0.0991906	0.101272	0.0778168	0.115641	0.112822	0.0912636	0.0932367	0.098884	0.214397	0.042505
ADARB1	NM_015834	chr21	46494493	46646478	+	1.2929	1.6073	1.22558	0.997116	1.78747	1.25975	1.73772	1.25248	1.42055	1.18885	1.15064	1.1806
ADARB1	NR_027672	chr21	46494493	46646478	+	0	0	0.0529141	0	0	0	0	0	0	0	0	0
ADARB1	NR_027673	chr21	46494493	46646478	+	0.573693	0.533615	0.688471	0.845633	0.838005	1.09473	0.55613	0.962292	0.468976	0.770556	0.620042	0.768
ADARB1	NR_027674	chr21	46494493	46646478	+	0	0	0	0	0	0	0	0	0	0	0	0
ADARB1	NR_073200	chr21	46494493	46646478	+	0	4.78e-08	0	3.4e-09	0	0	0	0	0	0	0	1.42e-08
ADARB2	NM_018702	chr10	1223253	1779670	-	0.249516	0.209391	0.118002	0.0777754	0.133002	0.111487	0.385568	0.371741	0.0964168	0.203932	0.0719126	0.138299
ADARB2-AS1	NR_033387	chr10	1568825	1599179	+	0.211499	0.108378	0	0.111492	0.120087	0	0.112013	0	0.163815	0	0	0
ADAT1	NM_012091	chr16	75632247	75657221	-	9.21675	8.86478	9.98909	9.20601	10.5616	9.81837	9.82702	11.1462	11.1562	9.8365	9.82351	8.81367
ADAT1	NR_036460	chr16	75632247	75657221	-	0.142662	0.653318	0.116376	0.447002	0.948084	0.569419	0.775359	0.243303	1.15556	1.27248	0.698894	0.715338
ADAT2	NM_182503	chr6	143743969	143771841	-	0.5669	0.697261	0.631543	0.615592	0.417893	0.493485	0.398988	0.38026	0.379284	0.46104	0.607007	0.587293
ADAT3	NM_138422	chr19	1905371	1913446	+	3.29913	3.11271	2.96282	3.33246	3.95208	3.50147	3.83615	3.80818	2.877	3.02611	1.35075	2.33703
ADC	NM_052998	chr1	33546714	33585995	+	2.7247	3.24248	3.46161	4.64316	4.869	4.67263	5.37353	3.90727	4.1345	3.96163	2.38352	2.45649
ADCK1	NM_001142545	chr14	78266426	78400297	+	1.39099e-05	7.9378e-06	4.87406e-05	0.235194	1.23004e-05	0.351249	0.0921115	2.1361e-05	0.000191526	1.50365e-05	1.69721e-05	0.628775
ADCK1	NM_020421	chr14	78266426	78400297	+	1.291	1.44149	1.43877	1.23647	1.36818	1.10835	1.03767	1.77125	1.38188	1.40228	1.49613	0.726291
ADCK2	NM_052853	chr7	140372953	140394908	+	15.3977	15.3496	14.3504	13.9212	13.2945	13.2796	9.02503	8.44878	11.5973	11.6226	15.8468	14.9652
ADCK3	NM_020247	chr1	227127938	227175246	+	14.724	13.0556	17.9929	17.4795	24.2136	25.3046	19.22	18.9231	19.2201	20.3507	13.9514	14.6314
ADCK4	NM_001142555	chr19	41197434	41221011	-	1.35583	2.83511	1.43534	2.50185	3.5838	0.885818	0.260586	1.29868	2.56133	0.592745	1.17085	0.872168
ADCK4	NM_024876	chr19	41197434	41222790	-	6.84794	6.0075	5.616	5.30274	4.5528	5.8369	8.0441	6.42786	5.00142	6.38724	6.47917	7.14497
ADCK5	NM_174922	chr8	145597731	145618453	+	1.94362	1.19404	2.01893	1.93666	2.44418	2.47462	2.31138	1.95554	2.16584	2.20929	1.86941	1.37881
ADCY1	NM_021116	chr7	45614125	45762714	+	0.142113	0.136033	0.166875	0.217079	0.178197	0.172991	0.31521	0.347079	0.226109	0.236021	0.139189	0.153094
ADCY10	NM_001167749	chr1	167778625	167883453	-	0	0	0.0225436	0.0111384	0	0	0	0	0	0	0	0
ADCY10	NM_018417	chr1	167778625	167883453	-	0	0	1.25354e-05	1.14814e-05	0	0	0	0	0	0	0	0
ADCY10P1	NR_026938	chr6	41068773	41108573	+	0.0351402	0.0475842	0.0860651	0.0364676	0.039381	0.0329927	0.0245086	0.0114219	0.0180711	0.0231639	0.0599138	0.0450842
ADCY2	NM_020546	chr5	7396343	7830194	+	0	0	0	0	0	0	0.00845022	0	0.0124653	0.00798937	0	0
ADCY3	NM_004036	chr2	25042039	25142055	-	14.8074	15.6383	16.8672	16.7143	13.8	12.7971	8.20147	8.98737	10.5329	11.9582	15.5432	15.6377
ADCY4	NM_001198568	chr14	24787555	24804277	-	0	0	0	0	0	0	0	0	0	0	0	0
ADCY4	NM_001198592	chr14	24787555	24804277	-	0	0	0	0	0	0	0	0	0	0	0	0
ADCY4	NM_139247	chr14	24787555	24804277	-	0	0	0	0	0	0	0	0	0	0	0	0
ADCY5	NM_001199642	chr3	123001143	123135189	-	0.0103833	0.0211334	0.0218399	0.0107948	0.0233184	0.00976803	0.0108829	0	0.0321057	0.0102872	0.0532234	0
ADCY5	NM_183357	chr3	123001143	123167392	-	2.3965e-06	2.3579e-06	2.7989e-06	2.636e-06	2.9925e-06	2.1908e-06	2.5075e-06	0.00848219	3.5739e-06	2.2691e-06	3.3249e-06	0
ADCY6	NM_015270	chr12	49159975	49177877	-	1.70154	1.95871	2.17586	2.14192	2.56091	3.55359	2.9552	2.54048	2.95117	2.95306	1.83247	1.53627
ADCY6	NM_020983	chr12	49159981	49182820	-	5.11801	5.53	6.49222	5.27619	7.82976	5.90914	6.6769	8.44782	6.39455	6.71468	5.0051	5.49395
ADCY7	NM_001114	chr16	50321823	50352043	+	5.08808	5.52747	6.301	5.88898	6.7956	7.04163	6.66933	6.94258	6.26522	6.68973	6.0432	5.68658
ADCY8	NM_001115	chr8	131792547	132052835	-	0	0	0	0	0	0	0	0.0511092	0	0	0	0
ADCY9	NM_001116	chr16	4012650	4166186	-	1.60125	1.77442	2.06967	1.96124	2.56937	2.39077	2.10597	2.2367	2.18013	1.9171	1.69329	1.826
ADCYAP1	NM_001099733	chr18	904944	912173	+	0.153178	0.155639	0.0355069	0.0708499	0.0379012	0.0157167	0.0532393	0.149679	0.105255	0.0843189	0.108667	0.13131
ADCYAP1	NM_001117	chr18	905197	912173	+	7.3553e-06	0.000300235	0.000315188	1.821e-07	0.000340238	0.000290336	0.00031095	7.163e-06	2.5457e-06	2.2728e-06	0.0003959	1.2528e-06
ADCYAP1R1	NM_001118	chr7	31092076	31151093	+	0	0	0	0.000636964	0	0.000579882	5.71e-08	0	0	0.000598568	0	0
ADCYAP1R1	NM_001199635	chr7	31092076	31151093	+	0	0	0	2.32425e-05	0	2.13362e-05	4.57e-08	0	0	2.14043e-05	0	0
ADCYAP1R1	NM_001199636	chr7	31092076	31151093	+	0	0	0	2.61401e-05	0	2.39891e-05	4.61e-08	0	0	2.40898e-05	0	0
ADCYAP1R1	NM_001199637	chr7	31092076	31151093	+	0	0	0	0.00785459	0	0.00710523	0.0172374	0	0	0.00749749	0	0
ADD1	NM_001119	chr4	2845584	2931802	+	21.625	20.1665	24.5625	22.6991	25.1085	25.2492	19.0106	20.6025	16.3295	18.8512	22.8035	23.5598
ADD1	NM_014189	chr4	2845584	2931802	+	2.40624	3.21204	2.23791	2.63695	1.74482	1.79112	2.22215	2.28624	2.78505	2.46337	1.07871	2.24715
ADD1	NM_014190	chr4	2845584	2931802	+	2.09833	3.06942	1.40358	1.0599	1.88822	1.56222	1.84523	0.809629	2.99453	0.861071	1.97212	0.908719
ADD1	NM_176801	chr4	2845584	2931802	+	0.218294	0.470574	0.118363	0.115284	0.120402	0.101573	0.200672	0.0853077	0.499388	0.106172	0.0854645	0.0807746
ADD2	NM_001185054	chr2	70889216	70994847	-	5.4823e-05	9e-10	4.94e-08	0.228899	0.000109564	7.43666e-05	3.843e-07	1.66712e-05	4.0418e-06	0.15975	4.36326e-05	5.7605e-06
ADD2	NM_001185055	chr2	70902216	70995375	-	6.7e-09	0.295038	0.211404	3.17481e-05	4.333e-07	2e-10	0.146793	2.8633e-06	0.00035098	1e-10	0.147889	0.249856
ADD2	NM_001617	chr2	70889216	70995375	-	4.02093	3.96901	4.41819	4.04612	5.12638	4.90177	2.90709	2.92114	3.36909	3.92564	3.98436	4.5818
ADD2	NM_017482	chr2	70902216	70995375	-	0.258469	0.0066505	0.00112543	0.206234	0.205369	0.109536	0.000198612	0.263442	0.0940883	0.0401873	1.9513e-06	0.00188691
ADD2	NM_017488	chr2	70889216	70995375	-	0.370715	0.338632	0.294485	0.0959947	2.63e-08	0.381736	1.156e-07	0.116923	0.460483	6.37811e-05	0.657214	0.250585
ADD3	NM_001121	chr10	111767711	111895323	+	9.97351	8.86702	8.15673	9.49051	9.49473	8.12363	1.49096	6.05597	10.6634	9.60497	9.54348	6.93616
ADD3	NM_016824	chr10	111767711	111895323	+	12.7425	12.9035	13.2412	12.1547	17.5592	20.5396	23.9033	18.0905	16.9576	17.3488	12.052	13.6802
ADD3	NM_019903	chr10	111765726	111895323	+	2.92484	3.40173	2.74047	2.34241	4.92679	5.03833	10.9203	6.36441	4.56627	3.87875	1.42679	2.44555
ADGB	NM_024694	chr6	146920136	147136597	+	0	0	0	0	0	0	0	0	0	0	0	0
ADH1A	NM_000667	chr4	100197523	100212185	-	0	0	0	0	0	0	0	0	0	0	0	0
ADH1B	NM_000668	chr4	100227527	100242572	-	0	0	0	0	0	0	0	0	0	0	0	0
ADH1C	NM_000669	chr4	100257649	100273917	-	0	0	0	0	0	0	0	0.0382973	0	0	0	0
ADH4	NM_000670	chr4	100044833	100065449	-	0	0	0	0	0	0	0	0	0	0	0	0
ADH5	NM_000671	chr4	99992130	100009931	-	49.2253	48.3099	51.7949	51.751	55.7783	55.7055	43.8819	40.9284	47.629	45.1579	48.0245	47.9377
ADH6	NM_000672	chr4	100125879	100140403	-	0	0	0	0	0	0	0	0	0	0	0	0
ADH6	NM_001102470	chr4	100123795	100140403	-	0	0	0	0	0	0	0	0	0	0	0	0
ADH7	NM_000673	chr4	100333418	100356667	-	0	0	0	0	0	0	0	0	0	0	0	0
ADH7	NM_001166504	chr4	100333418	100356291	-	0	0	0	0	0	0	0	0	0	0	0	0
ADHFE1	NM_144650	chr8	67344718	67381044	+	0.059335	0.0302309	0	0.0309306	0	0	0.0934831	0.0579945	0	0.0293998	0.0760973	0
ADI1	NM_018269	chr2	3501690	3523350	-	76.3706	75.5625	97.4776	96.2082	110.633	105.292	70.1947	68.049	77.0639	78.6793	83.4683	84.2766
ADIG	NM_001018082	chr20	37209838	37217104	+	0	0	0	0	0	0	0	0	0.130125	0	0	0
ADIPOQ	NM_001177800	chr3	186560463	186576252	+	0	0	0	0	0	0	0	0	0	0	0	0
ADIPOQ	NM_004797	chr3	186560463	186576252	+	0	0	0	0	0	0	0	0	0	0	0	0
ADIPOQ-AS1	NR_046662	chr3	186569676	186573912	-	0	0	0	0	0	0	0	0	0	0	0	0
ADIPOR1	NM_015999	chr1	202909960	202927524	-	53.1163	51.4862	65.9571	64.6756	73.9266	70.5548	57.9508	54.79	62.8571	64.1622	56.9809	53.5437
ADIPOR1	NR_046083	chr1	202909960	202927700	-	2.99049	1.99997	3.02104	1.33141	1.76034	3.58846	2.54992	4.32285	3.81072	3.63017	1.70713	2.01531
ADIPOR2	NM_024551	chr12	1800247	1897845	+	22.6319	22.1792	18.9932	18.5953	19.4562	20.1324	24.0273	23.5824	20.6027	20.1284	19.4901	20.5293
ADIRF	NM_006829	chr10	88728188	88730666	+	1.59313	0.815512	1.58944	0.823183	0.907922	0.529387	1.88655	1.45498	0.774514	1.28956	1.27061	0.677307
ADK	NM_001123	chr10	75936247	76469061	+	16.5713	16.5296	15.6383	17.7229	12.498	12.1944	11.5104	12.1007	12.1345	10.9161	16.1297	15.4375
ADK	NM_001202449	chr10	75936247	76469061	+	3.21453e-05	0.198951	0.337983	0	0.16692	0.121319	3.42368e-05	0.0880751	2.90393e-05	0.387077	0.290778	2.90234e-05
ADK	NM_001202450	chr10	75910943	76469061	+	1.24654	1.34971	1.54187	1.45133	1.04378	1.20661	0.436972	0.61257	0.347783	0.711577	2.22274	1.02976
ADK	NM_006721	chr10	75910943	76469061	+	1.61505	0.00129977	0.00429552	0.00042729	1.43776	0.515957	1.53487	0.529753	1.83868	0.829838	1.68672	2.82106
ADM	NM_001124	chr11	10326642	10328923	+	13.0081	14.6489	12.5139	10.9992	11.9586	12.4319	17.2869	16.8518	12.5295	11.271	14.8999	15.5983
ADM2	NM_001253845	chr22	50920153	50924866	+	0.0665145	0.108331	0.167982	5.2232e-06	0.074702	0.0500544	4.657e-07	0.117009	3.2018e-06	1.5104e-06	0.102286	0.0898
ADM2	NM_024866	chr22	50919985	50924866	+	3.24552e-05	3.3687e-05	3.6117e-05	0.0651525	3.87359e-05	3.04743e-05	0.091956	3.20783e-05	0.0774802	0.0869022	4.19916e-05	3.23792e-05
ADM5	NM_001101340	chr19	50191942	50194247	+	1.23967	1.63908	1.91807	1.56668	1.24612	1.38994	0.775421	0.696013	1.10123	0.705691	1.38667	2.06104
ADNP	NM_015339	chr20	49506883	49547527	-	5.47938	5.13411	7.39144	6.62943	7.83889	7.78432	4.93117	3.36478	4.13039	4.7401	5.31617	6.78091
ADNP	NM_181442	chr20	49506883	49547527	-	4.20272	5.35906	1.87189	3.14381	2.55581	2.07192	5.12712	8.90072	5.76866	4.98487	5.70932	3.77684
ADNP2	NM_014913	chr18	77866915	77898228	+	6.26237	6.24137	6.05587	5.98728	6.23342	6.61481	6.47027	6.46533	5.80816	5.51057	6.26691	7.14036
ADO	NM_032804	chr10	64564516	64568239	+	7.99572	7.74091	8.88433	8.81399	10.297	9.49486	10.5219	10.0166	10.908	10.2427	8.68993	7.91905
ADORA1	NM_000674	chr1	203096836	203136533	+	1.53392	0.576329	0.803138	0.349858	0.150213	0.626025	0.219813	0.203101	5.20395e-05	3.24939e-05	0.364446	0.850708
ADORA1	NM_001048230	chr1	203096836	203136533	+	3.16201	3.9012	3.31474	3.33618	3.55395	3.02201	1.73878	2.1045	2.14086	2.27361	4.65982	3.73473
ADORA2A	NM_000675	chr22	24823530	24838325	+	0.0642202	0.0435995	0.112726	0.0222912	0.0481314	0.100712	0.0898558	0.146437	0.0330987	0.127268	0.0548846	0.0206472
ADORA2A-AS1	NR_028483	chr22	24834245	24890783	-	0	0	0	0	0	0	0	0	0	0	0	0
ADORA2A-AS1	NR_028484	chr22	24825178	24890783	-	0	0	0	0	0.0240457	0	0.0897811	0.0418046	0	0	0	0.0206301
ADORA2B	NM_000676	chr17	15848231	15879210	+	17.6647	19.1255	19.5388	19.7862	21.8599	21.0609	17.6141	20.5614	16.2893	18.4516	15.8051	17.0724
ADORA3	NM_000677	chr1	112042051	112046743	-	0	0	0.026022	0	0	0	0.0259255	0.0241361	0	0	0	0.0238233
ADORA3	NM_001081976	chr1	112025970	112106597	-	0	0	0	0	0	0	0	0	0	0	0	0
ADORA3	NM_020683	chr1	112025970	112046743	-	0	0	0	0	0	0	0	0	0	0	0	0
ADPGK	NM_031284	chr15	73043708	73076126	-	16.1181	15.7853	17.8022	17.2209	15.6872	15.9782	15.4248	17.3049	19.0701	17.1302	15.6483	16.729
ADPGK	NR_023318	chr15	73043708	73076126	-	0.31921	0.528335	0.643769	0.982304	1.28454	1.01863	0.843027	0.162872	0.69313	0.785331	0.434531	0.481766
ADPGK	NR_023319	chr15	73043708	73076126	-	3.48623	3.26897	4.71624	3.11922	3.5381	3.46598	3.03418	3.78074	2.96877	3.32181	3.9133	3.16875
ADPGK-AS1	NR_040107	chr15	73075176	73090540	+	1.02218	1.40819	1.92052	1.41894	1.30666	1.39552	1.15662	1.25351	1.58043	1.56889	1.31029	1.08251
ADPRH	NM_001125	chr3	119298523	119308792	+	0.942843	1.63156	1.68673	1.84752	3.05413	2.42462	2.70268	3.00953	2.93953	2.41326	1.24859	1.59108
ADPRHL1	NM_138430	chr13	114076584	114107839	-	0.398271	1.30156e-05	0.210287	0.15528	0.0823086	0.138798	0.340157	1.0888e-06	0.094574	0.13724	1.75591e-05	9.9879e-06
ADPRHL1	NM_199162	chr13	114076260	114103457	-	0.362057	0.796552	0.634543	0.3928	0.331743	0.468894	0.419403	0.558336	0.472579	0.472003	0.848293	0.493131
ADPRHL2	NM_017825	chr1	36554453	36559533	+	35.493	38.3018	44.3951	44.704	38.3701	37.7064	28.8902	28.5501	30.7216	32.9094	35.1386	36.196
ADPRM	NM_020233	chr17	10600927	10614875	+	6.023	5.98668	4.79857	4.50765	4.77894	6.1682	7.64613	8.33193	5.85916	5.96928	4.86029	4.20441
ADRA1A	NM_000680	chr8	26627222	26722922	-	0	0	0	0	0	0	0	0	0	0	0	0
ADRA1A	NM_033302	chr8	26613913	26722922	-	0	0	0	0	0	0	0	0	0	0	0	0
ADRA1A	NM_033303	chr8	26605667	26722922	-	0.024018	0	0	0.02502	0	0.0226005	0	0	0	0	0	0.0231682
ADRA1A	NM_033304	chr8	26623371	26722922	-	0	0	0	0	0	0	0	0	0	0	0	0
ADRA1B	NM_000679	chr5	159343740	159400017	+	0.196724	0.175336	0.44047	0.307421	0.41483	0.370231	0.25814	0.28839	0.19012	0.121835	0.126116	0.237209
ADRA1D	NM_000678	chr20	4201278	4229659	-	0.0616615	0.0418597	0.0216444	0	0.0231045	0.0193395	0.0215669	0	0	0.0203659	0	0
ADRA2A	NM_000681	chr10	112836790	112840662	+	0.0138792	0	0	0	0	0	0.0145525	0	0	0	0	0
ADRA2B	NM_000682	chr2	96778623	96781888	-	0	0	0	0	0	0	0	0	0.0512913	0	0	0
ADRA2C	NM_000683	chr4	3768296	3770253	+	0	0.0291716	0	0.0298446	0.0644279	0.0538856	0.030068	0.0279828	0	0	0.0367163	0
ADRB1	NM_000684	chr10	115803806	115806667	+	0.209715	0.349408	0.281013	0.317535	0.342833	0.304947	0.260018	0.130412	0.353716	0.283355	0.342122	0.422898
ADRB2	NM_000024	chr5	148206156	148208197	+	2.29781	3.31648	4.35393	4.21947	5.44707	5.43158	4.7683	5.66796	4.39933	3.93055	3.29738	3.66828
ADRB3	NM_000025	chr8	37820514	37824184	-	0	0	0	0	0	0	0	0	0	0	0	0
ADRBK1	NM_001619	chr11	67033905	67054029	+	14.2467	14.5499	17.5515	16.6676	19.8481	17.9798	14.9408	13.9362	15.9609	14.9861	13.412	13.8743
ADRBK2	NM_005160	chr22	25960861	26125258	+	0.156519	0.188688	0.274135	0.183695	0.266704	0.23993	0.188258	0.24069	0.145601	0.160801	0.215335	0.284983
ADRM1	NM_007002	chr20	60878027	60883918	+	165.086	164.718	220.952	224.75	223.492	224.77	147.277	138.321	179.499	189.933	188.453	195.006
ADRM1	NM_175573	chr20	60878027	60883918	+	26.0064	30.6506	48.8242	35.1978	35.2012	34.5348	20.699	16.6872	31.9788	29.1569	34.247	27.7368
ADSL	NM_000026	chr22	40742504	40762575	+	80.203	82.5792	88.7868	83.727	77.7603	72.8604	61.365	59.3164	74.2812	72.7915	85.5235	88.5461
ADSL	NM_001123378	chr22	40742504	40762575	+	3.97545	2.40043	2.47709	4.69471	3.97587	2.08874	5.60066	4.80699	2.80907	6.06983	1.88937	1.65664
ADSS	NM_001126	chr1	244571794	244615436	-	31.5316	32.4062	29.87	31.8238	28.9046	29.7975	26.9606	26.9733	30.4356	27.3692	33.9713	34.7876
ADSSL1	NM_152328	chr14	105190534	105213647	+	0.35986	0.526149	0.578564	0.39683	0.435835	0.594239	1.08477	1.00921	1.1976	0.927267	0.165214	0.373599
ADSSL1	NM_199165	chr14	105196228	105213647	+	0.151001	2.4373e-06	5.0207e-06	0.104215	2.7942e-06	0.0712667	4.9493e-06	2.4568e-06	6.0701e-06	1.38897e-05	0.000318823	5.8898e-06
ADTRP	NM_001143948	chr6	11713888	11779280	-	0.0909357	0.000290028	0.0003055	0.000303839	0.000326772	0.000257022	0.000295005	0.000278003	0.0004584	0.240285	0.388704	0.000276676
ADTRP	NM_032744	chr6	11713888	11779280	-	1.8735e-06	0.223031	0.296837	0.260859	0.246313	0.294358	0.22991	0.24451	0.193187	2.93221e-05	7.0313e-05	0.301782
AEBP1	NM_001129	chr7	44143960	44154159	+	4.5477	5.60481	6.04221	5.57744	5.62421	5.25526	5.11245	6.21573	4.83585	4.92241	4.48	3.97938
AEBP2	NM_001114176	chr12	19592608	19675173	+	1.10699	1.43379	0.936642	0.939639	1.28438	1.52286	1.42027	1.45444	0.929596	0.609117	1.26624	2.01317
AEBP2	NM_001267043	chr12	19593515	19675173	+	0.205442	0.106017	0.225283	0.236824	0.0977039	0.0372016	0.245646	1.13955e-05	0.237465	0.0730785	0.0594189	0.0776337
AEBP2	NM_153207	chr12	19592608	19675173	+	3.3502	2.91919	2.81265	2.95219	3.1143	2.95838	2.68363	2.83294	2.65566	2.60754	2.92216	2.48551
AEN	NM_022767	chr15	89164527	89175512	+	38.0821	40.4908	54.9817	54.7782	71.7967	69.0691	86.2527	87.1133	73.3196	72.9438	39.6727	42.2886
AES	NM_001130	chr19	3052908	3062371	-	32.593	37.5718	34.5042	35.1858	41.7194	39.4229	44.32	42.5369	35.1663	34.9002	29.2508	29.4283
AES	NM_198969	chr19	3052908	3062964	-	1.60895	0.334395	0.552746	0.419525	0.128567	0.307914	0.789614	1.69286	0.931264	1.0384	0.296373	1.04287
AES	NM_198970	chr19	3052908	3062371	-	2.76382	1.52395	4.2116	1.73683	2.36613	3.35637	2.19124	3.37966	2.97666	2.60358	2.31644	1.88045
AFAP1	NM_001134647	chr4	7760440	7941653	-	0.133169	0.431124	2.61825e-05	0.0695366	0.136586	0.120177	0.12875	0.251566	0.207981	0.222594	0.326912	0.40916
AFAP1	NM_198595	chr4	7760440	7941653	-	14.6757	15.835	10.6203	10.4863	12.0955	11.4373	14.6897	15.8824	9.94443	9.68298	13.557	12.9109
AFAP1-AS1	NR_026892	chr4	7755817	7780654	+	0.404122	0.355777	0.171553	0.218068	0.15701	0.219319	0.179149	0.159446	0.156164	0.153985	0.24889	0.232247
AFAP1L1	NM_001146337	chr5	148651401	148721367	+	0.135039	0.547933	0.378985	4.25006e-05	1.91479e-05	0.248762	0.26384	0.105626	5.35892e-05	0.295595	0.433489	6.57823e-05
AFAP1L1	NM_152406	chr5	148651401	148721367	+	7.72966	6.83474	9.48017	9.43141	10.2275	9.66686	7.22521	6.98142	9.24119	7.89222	6.81651	7.39491
AFAP1L2	NM_001001936	chr10	116054583	116164515	-	1.31997	0.993007	1.0969	0.986278	1.21015	1.49884	2.19421	1.43884	1.45095	2.17725	0.968948	0.654997
AFAP1L2	NM_032550	chr10	116054583	116164515	-	0.51833	0.865249	0.296352	0.264712	0.231551	0.178821	0.000523488	0.806931	1.05766	0.312458	0.000154729	0.766782
AFF1	NM_001166693	chr4	87856154	88062206	+	0.662434	0.625293	0.625037	0.718974	0.758025	0.764504	1.42347	1.20608	0.883278	1.06067	0.671532	0.646535
AFF1	NM_005935	chr4	87928153	88062191	+	0.395909	0.308467	0.174849	0.270452	0.285327	0.363998	0.155509	0.636828	0.491731	0.108253	0.137742	0.271257
AFF2	NM_001169122	chrX	147582139	148082193	+	0.000896643	0	0	0	0	0	0	0	0	0	0	0
AFF2	NM_001169123	chrX	147582139	148082193	+	0.000578386	0	0	0	0	0	0	0	0	0	0	0
AFF2	NM_001169124	chrX	147582139	148082193	+	0.000896643	0	0	0	0	0	0	0	0	0	0	0
AFF2	NM_001169125	chrX	147582139	148082193	+	0.000962016	0	0	0	0	0	0	0	0	0	0	0
AFF2	NM_001170628	chrX	147800615	148082193	+	0	0	0	0	0	0	0	0	0	0	0	0
AFF2	NM_002025	chrX	147582139	148082193	+	0.000485682	0	0	0	0	0	0	0	0	0	0	0
AFF3	NM_001025108	chr2	100163716	100722045	-	0.103838	0.0603605	9.0377e-06	0.107894	0.12356	0.112848	0.0764772	0.187467	0.10012	0.0546829	0.116161	0.0568056
AFF3	NM_002285	chr2	100163716	100759037	-	0.0515139	0.117295	0.0815101	0.0535249	1.7969e-05	0.0150772	0.0184919	0.0150065	1.5867e-06	0.0542937	3.0924e-06	0.0180851
AFF4	NM_014423	chr5	132211071	132299354	-	7.30237	8.08455	6.74164	6.65946	8.20618	8.24376	10.2013	11.7597	8.50316	8.00969	6.86431	7.21301
AFG3L1P	NR_003226	chr16	90038988	90063028	+	0.369037	0.867391	0.301708	0.366901	0.648891	0.678546	0.450789	0.308198	0.278537	0.371547	0.508887	0.501607
AFG3L1P	NR_003227	chr16	90038988	90063028	+	1.80506	0.976545	1.52675	1.25926	1.13749	1.05805	0.688726	0.807654	0.724543	0.814862	1.08436	1.43368
AFG3L1P	NR_003228	chr16	90038988	90067195	+	0.590498	0.594903	0.954193	0.855353	0.451391	0.719391	0.292005	0.202268	0.191838	0.312243	0.494661	0.382766
AFG3L2	NM_006796	chr18	12328943	12377275	-	39.3722	40.718	40.3372	39.5125	41.0682	40.6047	34.8447	33.6513	35.4773	34.5737	40.5638	40.0381
AFM	NM_001133	chr4	74347462	74369718	+	0	0.0285523	0.0295416	0	0	0	0	0	0.0433359	0.0277701	0	0
AFMID	NM_001010982	chr17	76183398	76203782	+	2.62842	4.22752	2.61899	3.38261	3.20726	2.6323	3.29226	0.00565994	4.75299	1.69578	2.39024	3.30943
AFMID	NM_001145526	chr17	76183398	76203782	+	2.85499	0.807302	2.97583	2.33748	1.34231	2.70702	0.704071	3.77081	0.000519889	2.93441	3.04484	2.60393
AFMID	NR_027083	chr17	76183398	76193641	+	1.97582	0.800161	0.750391	1.63659	0.295557	1.05005	0.441061	0.433557	0.895384	0.175208	0.906957	0.775857
AFP	NM_001134	chr4	74301933	74321492	+	0.137504	0.0560369	0.115953	0.057325	0.216573	0.181156	0.202148	0.107513	0.127581	0.109007	0.105797	0.185719
AFTPH	NM_001002243	chr2	64751439	64820138	+	2.47623	3.19893	2.38457	1.79448	3.9518	2.36092	4.02314	1.21299	3.11506	3.12142	2.94511	1.82666
AFTPH	NM_017657	chr2	64751439	64820138	+	6.16	5.81111	5.39086	6.6205	4.88741	6.87729	4.94406	6.53601	7.19579	6.48165	5.54831	6.21817
AFTPH	NM_203437	chr2	64751439	64820138	+	0.652148	0.302413	1.36638	0.624384	0.801415	1.5064	2.01208	2.99005	0.565188	0.498228	0.787741	0.980221
AGA	NM_000027	chr4	178351929	178363657	-	10.6587	12.8201	11.927	11.5737	13.3634	12.6113	17.6363	17.6179	18.4907	17.9405	11.0464	10.8215
AGA	NM_001171988	chr4	178351929	178363657	-	2.20682	0.996639	2.24609	0.713062	0.876339	1.80882	2.69843	2.7406	4.24671	3.23824	0.968842	1.44891
AGA	NR_033655	chr4	178351929	178363657	-	3.19172e-05	3.55867e-05	6.94638e-05	0.191797	0.247373	0.288411	0.17346	0.213448	0.724153	0.457667	4.16466e-05	0.535232
AGAP1	NM_001037131	chr2	236402733	237040444	+	0.606987	0.378836	0.347468	0.353731	0.546609	0.61603	0.432763	0.553254	0.768787	0.639699	0.876294	0.297771
AGAP1	NM_001244888	chr2	236402733	236761846	+	0.603735	1.33821	0.82887	1.02028	1.02821	1.38934	1.16873	1.30177	0.867909	1.4639	1.35912	0.866503
AGAP1	NM_014914	chr2	236402733	237040444	+	0.938521	0.919554	0.554752	0.443979	0.474763	0.312032	1.03614	0.878931	0.348399	0.357095	0.363131	0.939187
AGAP11	NM_133447	chr10	88730498	88769960	+	0.111014	0.0306648	0.125019	0.0818047	0.0463902	0.0989887	0.116013	0.048936	0.124998	0.134839	0.0851822	0.0539147
AGAP2	NM_001122772	chr12	58118076	58132029	-	2.4203e-06	2.2892e-06	2.3444e-06	0.0552889	1.4864e-06	0.0878222	0.0306582	8.52e-07	1.6258e-06	1.1556e-06	0.0742507	2.1615e-06
AGAP2	NM_014770	chr12	58118076	58135944	-	0.164501	0.0892732	0.196062	0.16125	0.184706	0.141524	0.273333	0.321452	0.203433	0.141248	0.163225	0.148026
AGAP3	NM_001042535	chr7	150783826	150820725	+	2.19815	2.94124	2.36203	3.12562	2.88266	2.74538	3.80323	2.58592	3.60972	3.06582	1.9823	2.19939
AGAP3	NM_031946	chr7	150783826	150841523	+	11.3966	11.2565	9.39003	7.80473	11.0839	10.0229	9.20682	10.0481	9.99651	10.5973	10.7346	10.7154
AGAP4	NM_133446	chr10	46321050	46342921	-	0.657475	0.486255	0.528433	0.413661	0.591028	0.515317	0.324044	0.367383	0.343376	0.418414	0.422525	0.541459
AGAP5	NM_001144000	chr10	75434033	75457554	-	0.496425	0.454152	0.366553	0.355023	0.270873	0.345371	0.111314	0.314429	0.20499	0.393063	0.336531	0.392975
AGAP6	NM_001077665	chr10	51748078	51770259	+	1.4227	0.867698	0.902338	1.00874	0.642397	0.849531	0.58173	0.736608	0.682272	0.59327	1.30734	1.1978
AGAP7	NM_001077685	chr10	51464151	51486327	-	0.211302	0.207568	0.192705	0.162799	0.184649	0.301224	0.0919905	0.134949	0.0833186	0.192961	0.165715	0.15624
AGAP8	NM_001276343	chr10	51224681	51246409	-	0.448004	0.377439	0.294326	0.199959	0.240052	0.249579	0.193403	0.18935	0.213511	0.206583	0.335245	0.325965
AGAP8	NM_001276344	chr10	51224681	51246409	-	4.831e-06	0.0261437	0.0553269	0.0700461	4.01707e-05	1.74262e-05	0.0332907	0.047698	1.37324e-05	0.0502166	0.0676883	0.126226
AGAP9	NM_001190810	chr10	47191844	47213626	-	0.377148	0.283502	0.258636	0.22073	0.291442	0.264737	0.115384	0.195203	0.205937	0.224646	0.289552	0.279774
AGAP9	NM_001190810_1	chr10	48215724	48237508	+	0.406054	0.312942	0.282997	0.269475	0.317444	0.270177	0.133587	0.199239	0.205937	0.257107	0.334022	0.296503
AGBL1	NM_152336	chr15	86685242	87572283	+	0	0	0	0	0	0	0	0	0	0	0	0
AGBL2	NM_024783	chr11	47681143	47736928	-	0	0.0152781	0.0789699	0.031231	0.0843075	0.0282432	0.0157401	0.029333	0.0232047	0.0148716	0	0.0434212
AGBL3	NM_178563	chr7	134671259	134820530	+	0.0611065	0.0777496	0.176827	0.0794679	0.0858082	0.0574903	0.176223	0.149272	0.118086	0.0302719	0.117465	0.0589242
AGBL4	NM_032785	chr1	48998527	50489626	-	0.0364334	0	0	0	0.0204716	0	0	0	0	0.0180496	0	0.0175682
AGBL5	NM_001035507	chr2	27274491	27282403	+	13.5513	13.2274	14.9624	13.5963	17.592	17.1129	14.7939	12.0273	9.52236	10.9879	15.0564	10.7884
AGBL5	NM_021831	chr2	27274491	27293490	+	1.40399	1.64942	1.47987	1.8089	1.6223	1.76282	0.979493	2.0266	1.494	1.58798	1.02464	2.05847
AGER	NM_001136	chr6	32148745	32152099	-	0	2.62e-06	2.9843e-06	2.34e-08	9.25e-08	3.02e-08	0.121671	5.119e-07	0	0.0833948	2.6511e-06	5.0155e-06
AGER	NM_001136_1	chr6_apd_hap1	3463486	3466840	-	0	0	0	0	0	0	0	0	0	0	0	0
AGER	NM_001136_2	chr6_cox_hap2	3619426	3622780	-	0	0	0	0	0	0	0	0	0	0	0	0
AGER	NM_001136_3	chr6_mann_hap4	3491569	3494923	-	0	0	0	0	0	0	0	0	0	0	0	0
AGER	NM_001136_4	chr6_mcf_hap5	3528572	3531926	-	0	0	0	0	0	0	0	0	0	0	0	0
AGER	NM_001136_5	chr6_ssto_hap7	3496473	3499827	-	0	0	0	0	0	0	0	0	0	0	0	0
AGER	NM_001136_6	chr6_qbl_hap6	3409765	3413119	-	0	0	0	0	0	0	0	0	0	0	0	0
AGER	NM_001206929	chr6_qbl_hap6	3409765	3413119	-	0	0	0	0	0	0	0	0	0	0	0	0
AGER	NM_001206929_1	chr6_ssto_hap7	3496473	3499827	-	0	0	0	0	0	0	0	0	0	0	0	0
AGER	NM_001206929_2	chr6	32148745	32152099	-	0	0	1.538e-07	1.03e-08	4.23e-08	0	0.000307292	1.293e-07	0	0	1.034e-07	2.763e-07
AGER	NM_001206929_3	chr6_mcf_hap5	3528572	3531926	-	0	0	0	0	0	0	0	0	0	0	0	0
AGER	NM_001206929_4	chr6_apd_hap1	3463486	3466840	-	0	0	0	0	0	0	0	0	0	0	0	0
AGER	NM_001206929_5	chr6_cox_hap2	3619426	3622780	-	0	0	0	0	0	0	0	0	0	0	0	0
AGER	NM_001206929_6	chr6_mann_hap4	3491569	3494923	-	0	0	0	0	0	0	0	0	0	0	0	0
AGER	NM_001206932	chr6_mcf_hap5	3528572	3531926	-	0	0	0	0	0	0	0	0	0	0	0	0
AGER	NM_001206932_1	chr6_apd_hap1	3463486	3466840	-	0	0	0	0	0	0	0	0	0	0	0	0
AGER	NM_001206932_2	chr6_ssto_hap7	3496473	3499827	-	0	0	0	0	0	0	0	0	0	0	0	0
AGER	NM_001206932_3	chr6	32148745	32152099	-	0	4.3436e-05	4.35849e-05	4.94e-08	1.876e-07	2.244e-07	0	1.7778e-06	0	0	5.00054e-05	6.89857e-05
AGER	NM_001206932_4	chr6_cox_hap2	3619426	3622780	-	0	0	0	0	0	0	0	0	0	0	0	0
AGER	NM_001206932_5	chr6_mann_hap4	3491569	3494923	-	0	0	0	0	0	0	0	0	0	0	0	0
AGER	NM_001206932_6	chr6_qbl_hap6	3409765	3413119	-	0	0	0	0	0	0	0	0	0	0	0	0
AGER	NM_001206934	chr6	32148745	32152099	-	4.47665e-05	0	0	2.22e-08	0	0	0	4.691e-07	0	0	0	0
AGER	NM_001206934_1	chr6_apd_hap1	3463486	3466840	-	0	0	0	0	0	0	0	0	0	0	0	0
AGER	NM_001206934_2	chr6_ssto_hap7	3496473	3499827	-	0	0	0	0	0	0	0	0	0	0	0	0
AGER	NM_001206934_3	chr6_qbl_hap6	3409765	3413119	-	0	0	0	0	0	0	0	0	0	0	0	0
AGER	NM_001206934_4	chr6_cox_hap2	3619426	3622780	-	0	0	0	0	0	0	0	0	0	0	0	0
AGER	NM_001206934_5	chr6_mann_hap4	3491569	3494923	-	0	0	0	0	0	0	0	0	0	0	0	0
AGER	NM_001206934_6	chr6_mcf_hap5	3528572	3531926	-	0	0	0	0	0	0	0	0	0	0	0	0
AGER	NM_001206936	chr6_ssto_hap7	3496473	3499827	-	0	0	0	0	0	0	0	0	0	0	0	0
AGER	NM_001206936_1	chr6_qbl_hap6	3409765	3413119	-	0	0	0	0	0	0	0	0	0	0	0	0
AGER	NM_001206936_2	chr6_cox_hap2	3619426	3622780	-	0	0	0	0	0	0	0	0	0	0	0	0
AGER	NM_001206936_3	chr6	32148745	32152099	-	3.3e-09	0	0	1.361e-07	0	0	0	1e-10	0	5.93e-08	0	0
AGER	NM_001206936_4	chr6_mann_hap4	3491569	3494923	-	0	0	0	0	0	0	0	0	0	0	0	0
AGER	NM_001206936_5	chr6_apd_hap1	3463486	3466840	-	0	0	0	0	0	0	0	0	0	0	0	0
AGER	NM_001206936_6	chr6_mcf_hap5	3528572	3531926	-	0	0	0	0	0	0	0	0	0	0	0	0
AGER	NM_001206940	chr6_apd_hap1	3463486	3466840	-	0	0	0	0	0	0	0	0	0	0	0	0
AGER	NM_001206940_1	chr6_cox_hap2	3619426	3622780	-	0	0	0	0	0	0	0	0	0	0	0	0
AGER	NM_001206940_2	chr6_mann_hap4	3491569	3494923	-	0	0	0	0	0	0	0	0	0	0	0	0
AGER	NM_001206940_3	chr6_mcf_hap5	3528572	3531926	-	0	0	0	0	0	0	0	0	0	0	0	0
AGER	NM_001206940_4	chr6_qbl_hap6	3409765	3413119	-	0	0	0	0	0	0	0	0	0	0	0	0
AGER	NM_001206940_5	chr6_ssto_hap7	3496473	3499827	-	0	0	0	0	0	0	0	0	0	0	0	0
AGER	NM_001206940_6	chr6	32148745	32152099	-	0.0532931	0	0	5.21e-08	0	2.596e-07	0	1.9461e-06	0	8e-10	0	0
AGER	NM_001206954	chr6_cox_hap2	3619426	3622780	-	0	0	0	0	0	0	0	0	0	0	0	0
AGER	NM_001206954_1	chr6_mcf_hap5	3528572	3531926	-	0	0	0	0	0	0	0	0	0	0	0	0
AGER	NM_001206954_2	chr6_qbl_hap6	3409765	3413119	-	0	0	0	0	0	0	0	0	0	0	0	0
AGER	NM_001206954_3	chr6_mann_hap4	3491569	3494923	-	0	0	0	0	0	0	0	0	0	0	0	0
AGER	NM_001206954_4	chr6_ssto_hap7	3496473	3499827	-	0	0	0	0	0	0	0	0	0	0	0	0
AGER	NM_001206954_5	chr6	32148745	32152099	-	0.00769641	0	0	7.893e-07	0	3e-10	0	2.4e-09	0	0.000164366	0	0
AGER	NM_001206954_6	chr6_apd_hap1	3463486	3466840	-	0	0	0	0	0	0	0	0	0	0	0	0
AGER	NM_001206966	chr6_qbl_hap6	3409765	3413119	-	0	0	0	0	0	0	0	0	0	0	0	0
AGER	NM_001206966_1	chr6_ssto_hap7	3496473	3499827	-	0	0	0	0	0	0	0	0	0	0	0	0
AGER	NM_001206966_2	chr6_cox_hap2	3619426	3622780	-	0	0	0	0	0	0	0	0	0	0	0	0
AGER	NM_001206966_3	chr6_mann_hap4	3491569	3494923	-	0	0	0	0	0	0	0	0	0	0	0	0
AGER	NM_001206966_4	chr6_mcf_hap5	3528572	3531926	-	0	0	0	0	0	0	0	0	0	0	0	0
AGER	NM_001206966_5	chr6	32148745	32152099	-	0	0	0	3.289e-07	0	3.67049e-05	0	0	0	3.1671e-06	0	0
AGER	NM_001206966_6	chr6_apd_hap1	3463486	3466840	-	0	0	0	0	0	0	0	0	0	0	0	0
AGER	NM_172197	chr6	32148745	32152099	-	0	0.133868	0.0924173	4.163e-07	1.4216e-06	0	0	8e-10	0	0	0.224603	0
AGER	NM_172197_1	chr6_apd_hap1	3463486	3466840	-	0	0	0	0	0	0	0	0	0	0	0	0
AGER	NM_172197_2	chr6_mann_hap4	3491569	3494923	-	0	0	0	0	0	0	0	0	0	0	0	0
AGER	NM_172197_3	chr6_cox_hap2	3619426	3622780	-	0	0	0	0	0	0	0	0	0	0	0	0
AGER	NM_172197_4	chr6_mcf_hap5	3528572	3531926	-	0	0	0	0	0	0	0	0	0	0	0	0
AGER	NM_172197_5	chr6_qbl_hap6	3409765	3413119	-	0	0	0	0	0	0	0	0	0	0	0	0
AGER	NM_172197_6	chr6_ssto_hap7	3496473	3499827	-	0	0	0	0	0	0	0	0	0	0	0	0
AGER	NR_038190	chr6_mann_hap4	3491569	3494923	-	0	0	0	0	0	0	0	0	0	0	0	0
AGER	NR_038190_1	chr6_mcf_hap5	3528572	3531926	-	0	0	0	0	0	0	0	0	0	0	0	0
AGER	NR_038190_2	chr6_qbl_hap6	3409765	3413119	-	0	0	0	0	0	0	0	0	0	0	0	0
AGER	NR_038190_3	chr6_ssto_hap7	3496473	3499827	-	0	0	0	0	0	0	0	0	0	0	0	0
AGER	NR_038190_4	chr6_cox_hap2	3619426	3622780	-	0	0	0	0	0	0	0	0	0	0	0	0
AGER	NR_038190_5	chr6	32148745	32152099	-	0.288955	0	1e-10	0.141919	0.0765811	0.22403	0	0.199461	0	0.128772	0	0.164032
AGER	NR_038190_6	chr6_apd_hap1	3463486	3466840	-	0	0	0	0	0	0	0	0	0	0	0	0
AGFG1	NM_001135187	chr2	228336888	228425938	+	1.05966e-05	8.4391e-06	1.17218e-05	7.9967e-06	2.6576e-06	1.3804e-05	1.75676e-05	1.34752e-05	3.18939e-05	0	7.6889e-06	1.2279e-05
AGFG1	NM_001135188	chr2	228336888	228425938	+	0.51919	0.270786	0.964207	0.717045	0.787882	0.747351	0.837774	0.737923	0.366898	3.12153e-05	0.745761	0.798085
AGFG1	NM_001135189	chr2	228336888	228425938	+	0.089705	0.0407324	0.138489	0.186324	0.0126607	0.0834077	1.1737e-06	0.24726	0.146413	3e-10	9.5e-09	3.101e-07
AGFG1	NM_004504	chr2	228336888	228425938	+	3.11478	3.53692	2.958	3.08031	3.74429	3.6757	3.10018	2.98077	3.47111	3.92152	3.33131	3.63175
AGFG2	NM_006076	chr7	100136834	100165843	+	2.69301	3.27035	3.12349	2.62722	3.07358	3.25281	2.84603	3.09679	2.15856	2.93158	2.37128	2.38272
AGGF1	NM_018046	chr5	76326210	76361058	+	13.8573	13.0883	13.2282	12.7703	12.2863	11.977	12.65	11.9179	13.9266	11.7208	14.2013	13.3263
AGK	NM_018238	chr7	141251078	141354209	+	9.61369	9.40876	11.6313	10.802	13.5053	12.7441	11.5317	11.9615	12.0983	11.427	8.95526	10.0083
AGL	NM_000028	chr1	100316045	100389579	+	0.118445	0.342697	0	0.0975749	0	0.107972	0	0	0.209355	0.255064	0	0.126578
AGL	NM_000642	chr1	100315640	100389579	+	2.88567	2.75195	2.63755	2.84361	3.05717	2.87411	3.88277	4.38469	2.89578	3.32551	2.99466	3.00084
AGL	NM_000643	chr1	100316045	100389579	+	0.000129618	1.56371e-05	6.9483e-06	4.72606e-05	7.5726e-06	6.80435e-05	0.000108329	9.91716e-05	0.000365135	3.4277e-06	0.000372487	4.92339e-05
AGL	NM_000644	chr1	100316045	100389579	+	1.00077e-05	0.000159873	0.00030022	8.845e-07	0.000198975	4.28502e-05	0.0131294	0.000261061	0.000137864	0.00093776	9.6607e-06	0.000385021
AGL	NM_000645	chr1	100326766	100389579	+	0.151611	1.509e-07	3.7e-09	2.6e-09	1.68e-08	0.134247	2e-10	3.3e-09	2.32e-08	4.1e-09	9e-10	2e-10
AGL	NM_000646	chr1	100316531	100389579	+	5.3e-09	4.068e-07	3.7e-09	1.6e-08	1.68e-08	3.7e-09	2e-10	0.224186	0.417519	4.1e-09	9e-10	2e-10
AGMAT	NM_024758	chr1	15898194	15911605	-	0.0344159	0.0350367	0	0	0.0386715	0.0161902	0.00902473	0.0420375	0.0532083	0.0340999	0.0441096	0.0165947
AGMO	NM_001004320	chr7	15239943	15601640	-	8.03111	8.1111	4.33507	4.70328	5.40272	6.36367	16.8103	15.5013	9.73471	8.5751	4.64884	4.09852
AGO1	NM_012199	chr1	36348810	36389899	+	8.1799	8.54328	9.29364	9.6861	10.2161	9.64975	7.67711	8.94824	8.8102	8.29915	7.78877	8.65045
AGO2	NM_001164623	chr8	141541264	141645646	-	0.34038	3.35018e-05	0.691123	0.277284	0.257128	0.42948	0.109966	0.224458	0.751573	2.2131e-05	2.41226e-05	0.225481
AGO2	NM_012154	chr8	141541264	141645646	-	9.28126	11.5892	11.0349	11.8816	12.8185	11.0355	9.45496	10.1084	9.33621	9.62975	11.2298	10.4032
AGO3	NM_024852	chr1	36396683	36522063	+	6.25456	7.20209	6.84807	6.72204	6.79338	7.12246	7.14176	7.35394	5.39055	6.06094	6.92085	6.37705
AGO3	NM_177422	chr1	36396683	36522063	+	5.2875e-06	0.0887645	0.131717	1.11375e-05	5.1634e-06	3.2911e-06	0.0568271	5.4481e-06	0.152559	0.0993932	0.076837	0.103701
AGO4	NM_017629	chr1	36273828	36323490	+	1.39729	1.24662	1.05245	0.9784	1.12378	1.45498	1.15871	1.08771	1.12032	1.1326	1.21563	1.23893
AGPAT1	NM_006411	chr6_cox_hap2	3606664	3614597	-	0	0	0	0	0	0	0	0	0	0	0	0
AGPAT1	NM_006411_1	chr6_mann_hap4	3478807	3486740	-	0	0	0	0	0	0	0	0	0	0	0	0
AGPAT1	NM_006411_2	chr6_mcf_hap5	3515812	3523745	-	0	0	0	0	0	0	0	0	0	0	0	0
AGPAT1	NM_006411_3	chr6_qbl_hap6	3397003	3404936	-	0	0	0	0	0	0	0	0	0	0	0	0
AGPAT1	NM_006411_4	chr6_ssto_hap7	3483711	3491644	-	0	0	0	0	0	0	0	0	0	0	0	0
AGPAT1	NM_006411_5	chr6	32135983	32143916	-	6.9537	8.25081	10.0612	8.10828	10.1418	10.548	10.3871	7.71764	10.993	9.53644	7.27253	6.24033
AGPAT1	NM_006411_6	chr6_apd_hap1	3450724	3458657	-	0	0	0	0	0	0	0	0	0	0	0	0
AGPAT1	NM_032741	chr6_ssto_hap7	3483711	3493616	-	0	0	0	0	0	0	0	0	0	0	0	0
AGPAT1	NM_032741_1	chr6_qbl_hap6	3397003	3406908	-	0	0	0	0	0	0	0	0	0	0	0	0
AGPAT1	NM_032741_2	chr6_mcf_hap5	3515812	3525717	-	0	0	0	0	0	0	0	0	0	0	0	0
AGPAT1	NM_032741_3	chr6	32135983	32145888	-	1.41741	1.53637	0.0037061	1.25568	1.93121	0.424801	0.00115292	3.35283	0.316451	1.9808	0.000266164	2.75914
AGPAT1	NM_032741_4	chr6_apd_hap1	3450724	3460629	-	0	0	0	0	0	0	0	0	0	0	0	0
AGPAT1	NM_032741_5	chr6_mann_hap4	3478807	3488712	-	0	0	0	0	0	0	0	0	0	0	0	0
AGPAT1	NM_032741_6	chr6_cox_hap2	3606664	3616569	-	0	0	0	0	0	0	0	0	0	0	0	0
AGPAT2	NM_001012727	chr9	139567595	139581911	-	4.5262	3.82746	4.6314	3.47912	3.85154	3.46019	3.74744	2.89846	1.83555	1.78055	2.20258	5.13499
AGPAT2	NM_006412	chr9	139567595	139581911	-	16.5418	19.7153	22.9184	20.9783	21.9217	22.6635	13.5384	14.1857	17.0946	17.4252	19.5863	17.3619
AGPAT3	NM_001037553	chr21	45345279	45407475	+	0.000254055	0.52574	0.000718844	0.00271288	0.000223318	0.000435046	0.000599818	0.000662934	0.000355178	0.00040046	0.000712481	0.00134297
AGPAT3	NM_020132	chr21	45285116	45407475	+	6.46536	5.94702	6.96548	6.84268	7.08506	6.49124	6.72368	6.67845	7.07772	6.36515	6.08227	6.21609
AGPAT4	NM_020133	chr6	161551057	161695107	-	0.4943	0.550382	0.308898	0.312336	0.457275	0.471255	0.580856	0.691735	0.320065	0.456607	0.282362	0.360585
AGPAT4-IT1	NR_024277	chr6	161581164	161583014	-	0.0608754	0.0930527	0.0641949	0.0317372	0.0685102	0.0286448	0.0639454	0.0892515	0.0470716	0.09049	0	0.0293681
AGPAT5	NM_018361	chr8	6565878	6619021	+	8.01285	8.20167	8.73854	9.08954	8.35839	8.4156	6.5528	6.68209	7.61304	7.65258	9.79737	10.0527
AGPAT6	NM_178819	chr8	41435707	41482520	+	9.95041	9.49208	9.70254	9.31378	9.39068	9.13164	9.3464	10.1228	9.89961	9.83299	9.22478	9.28538
AGPAT9	NM_001256421	chr4	84457260	84527027	+	28.4106	19.0573	37.0457	33.4739	22.1296	30.8686	37.3435	33.4825	47.1234	41.1518	29.1393	25.8876
AGPAT9	NM_001256422	chr4	84457067	84527027	+	0.000209629	2.69804	0.728903	0.00016974	0.818706	0.000269806	1.02309	1.26317	0.00022592	0.571114	0.878257	0.657274
AGPAT9	NM_032717	chr4	84457470	84527027	+	23.9225	27.3501	35.1796	40.3508	34.7344	29.7863	22.2232	21.5507	32.686	35.2733	29.0019	33.2802
AGPHD1	NM_001013619	chr15	78799906	78826012	+	0.40314	0.358813	0.206252	0.234799	0.252427	0.651216	0.277207	0.44809	0.412381	0.247706	0.171038	0.506914
AGPHD1	NM_001083612	chr15	78799906	78829715	+	1.23551	0.964137	1.18053	1.51053	0.870521	0.880284	1.37677	1.56225	1.78057	1.75775	0.979062	0.433893
AGPS	NM_003659	chr2	178257471	178408564	+	14.4547	13.8933	14.7013	14.9629	16.9777	17.4681	19.7437	19.9274	18.6576	17.6346	14.2742	14.0266
AGR2	NM_006408	chr7	16832264	16844738	-	0.0623915	0.0637332	0.198275	0	0	0	0	0.061022	0	0	0	0.0602744
AGR3	NM_176813	chr7	16899030	16921613	-	0	0	0	0	0	0	0	0	0	0	0	0
AGRN	NM_198576	chr1	955503	991499	+	27.6142	29.006	29.9473	26.8862	24.8548	24.7171	33.6517	38.0772	31.5062	32.2325	21.9264	22.8049
AGRP	NM_001138	chr16	67516474	67517716	-	0	0.173687	0	0	0	0	0.0896902	0.0830461	0.131412	0.0841656	0.109165	0.082064
AGSK1	NR_026811	chr15	82944822	82975798	+	0.949742	0.650772	0.820137	0.656691	0.680987	0.686433	0.646476	0.585025	0.681065	0.536349	0.876185	0.813604
AGSK1	NR_026811_1	chr15	82764078	82798323	-	1.46513	1.06058	1.30041	1.24222	1.01092	1.22495	0.980749	1.07416	1.17532	0.959539	1.54917	1.40761
AGSK1	NR_026811_2	chr15	83140664	83182901	-	1.491	1.11685	1.32147	1.21846	1.0469	1.21748	0.984739	1.05985	1.15679	0.955542	1.56059	1.43003
AGT	NM_000029	chr1	230838272	230850336	-	0	0	0	0	0	0	0	0	0	0	0	0
AGTPBP1	NM_015239	chr9	88161454	88356944	-	4.00559	3.32506	3.36029	3.3852	3.88662	3.43816	3.91366	3.85459	4.37748	3.51294	3.31825	3.73371
AGTR1	NM_000685	chr3	148415658	148460790	+	7.7e-09	0	5.6204e-06	1.25329e-05	5.7886e-06	0.241283	3.7e-09	0.343441	0.34381	0.154557	0.17996	7.5e-08
AGTR1	NM_004835	chr3	148415658	148460790	+	2.393e-07	0	1.12e-08	0.000298742	1.95814e-05	0.128982	1.47e-07	1.76e-08	6.8171e-06	1.77893e-05	0	3.113e-07
AGTR1	NM_009585	chr3	148415658	148460790	+	0.000599277	0	4.25e-08	0.406073	0.4661	0.304885	0.000632528	2.74741e-05	0.209837	0.138505	0	7.9336e-06
AGTR1	NM_031850	chr3	148415658	148460790	+	0	0	0.240674	1.21e-08	4.02e-07	3.3959e-06	0	0.000289477	0.152829	0.262959	0.000420521	0.176219
AGTR1	NM_032049	chr3	148447967	148460790	+	0.198389	0	0	2.1965e-06	3.0831e-06	4.82e-08	0.312717	0	0.101011	0	0	8.75979e-05
AGTR2	NM_000686	chrX	115301958	115306225	+	0	0	0	0	0	0	0	0	0	0	0	0
AGTRAP	NM_001040194	chr1	11796142	11810828	+	5.69307	6.5096	6.512	5.30671	10.2267	5.23691	6.0708	5.35823	2.16256	5.17648	4.62796	4.65172
AGTRAP	NM_001040195	chr1	11796142	11810828	+	0.248218	0.279425	0.332263	0.136959	9.0545e-06	0.320856	1.85049e-05	0.233915	0.431454	0.643849	0.835543	0.412956
AGTRAP	NM_001040196	chr1	11796142	11810828	+	0.715374	0.508587	0.441587	0.254847	0.654247	0.560414	0.584073	0.804935	0.204783	0.347593	0.286345	0.264202
AGTRAP	NM_001040197	chr1	11796142	11810828	+	2.27679	1.53823	1.81663	1.37129	1.8863	3.55883	2.71717	3.64943	2.37267	1.90831	1.17321	1.16874
[truncated: 42,564 more rows]

## Sheet: Figure 1I and S1D full dataset
Metabolite name	Control-1	Control-2	Control-3	Control-4	250nM-1	250nM-2	250nM-3	250nM-4	500nM-1	500nM-2	500nM-3	500nM-4	Raw peak area		Average control group raw peak area			Metabolite name	Control-1	Control-2	Control-3	Control-4	250nM-1	250nM-2	250nM-3	250nM-4	500nM-1	500nM-2	500nM-3	500nM-4	Fold change compared to control group average
[truncated: 154 more rows]

[truncated: 9 more sheets: Figure 1J and S1E full dataset, Figure 1C, Figure 1D and S1A, Figure 1E, Figure 1F, Figure 1I and S1D, Figure 1J and Fig S1E, Figure S1B, Figure S1C]
