# Supplementary material for: DHODH inhibition enhances the efficacy of immune checkpoint blockade by increasing cancer cell antigen presentation
Source: eLife. 2024 Jul 8;12:RP87292. doi: 10.7554/eLife.87292 (PMC11230627; doi:10.7554/eLife.87292)
Supplement: Figure 2—source data 1. [file elife-87292-fig2-data1.xlsx]

## Sheet: Figure 2A and S2A
	1	2	3	4	5	6	7	8	9	10	11	12		BQ +/- rU 100uM										Figure 2A
A	94	292	315	268	242	182	138	106	118	111	98	32	Lum	507482
B	358	439982	435091	398559	372477	252271	188401	146358	143886	141827	136694	110	Lum	0.866991	0.857353	0.785366	0.733971	0.497104	0.371247	0.288401	0.283529	0.279472	0.269358
C	380	525402	508445	440024	445555	286391	214061	174795	163570	154608	138863	119	Lum	1.03531	1.0019	0.867074	0.877973	0.564338	0.42181	0.344436	0.322317	0.304657	0.273632
D	389	525643	543370	470919	439498	283714	221768	189793	171708	163388	159731	185	Lum	1.03579	1.07072	0.927953	0.866037	0.559063	0.436997	0.37399	0.338353	0.321958	0.314752
E	397	523581	519586	536015	512846	489133	446098	474738	480547	451755	354686	252	Lum	1.03172	1.02385	1.05623	1.01057	0.963844	0.879043	0.935478	0.946925	0.89019	0.698914
F	410	529270	560189	547129	535713	470941	471738	497009	510226	458328	342477	259	Lum	1.04293	1.10386	1.07813	1.05563	0.927996	0.929567	0.979363	1.00541	0.903142	0.674856
G	312	501012	518389	488460	488623	439554	403321	439894	446024	434532	321281	220	Lum	0.987251	1.02149	0.962518	0.962839	0.866148	0.79475	0.866818	0.878897	0.856252	0.633089
H	39	201	231	235	191	171	179	162	187	161	164	49	Lum
	1	2	3	4	5	6	7	8	9	10	11	12		Ter +/- rU 100uM
A	91	295	338	353	299	316	262	242	160	106	64	30	Lum	466992										Figure S2A
B	331	382367	415673	434828	420763	419307	372396	341449	201208	124873	76061	85	Lum	0.818787	0.890107	0.931125	0.901007	0.897889	0.797435	0.731166	0.430859	0.267398	0.162874
C	363	467094	490639	508353	506135	521596	451141	413082	240581	141107	83777	92	Lum	1.00022	1.05064	1.08857	1.08382	1.11693	0.966057	0.884559	0.515171	0.302161	0.179397
D	360	506216	541150	541826	546916	520311	477817	431060	245457	150308	93595	119	Lum	1.08399	1.1588	1.16025	1.17115	1.11418	1.02318	0.923056	0.525613	0.321864	0.200421
E	392	500500	526793	523561	535988	534268	513723	428215	398988	284669	175691	171	Lum	1.07175	1.12806	1.12113	1.14775	1.14406	1.10007	0.916964	0.854378	0.60958	0.376218
F	369	501311	511548	537294	526091	539773	491898	415478	399407	287412	171802	158	Lum	1.07349	1.09541	1.15054	1.12655	1.15585	1.05333	0.889689	0.855276	0.615454	0.367891
G	279	444465	448798	471522	474188	499811	458007	405471	383851	297283	162313	133	Lum	0.951761	0.96104	1.0097	1.01541	1.07028	0.980759	0.868261	0.821965	0.636591	0.347571
H	46	192	232	233	187	213	192	175	176	138	108	34	Lum
									Concentrations of reagents utilized for the experiments
										Column	[BQ] uM	[Ter] uM
										2	0	0		rows B, C, D no uridine
										3	0.0152416	0.0152416		rows E, F, G have 100uM uridine
										4	0.0457247	0.0457247
										5	0.137174	0.137174
										6	0.411523	0.411523
										7	1.23457	1.23457
										8	3.7037	3.7037
										9	11.1111	11.1111
										10	33.3333	33.3333
										11	100	100

## Sheet: Figure 2B
	Control-1	Control-2	Control-3	Control-4	Control-5	Control-6	BQ-1	BQ-2	BQ-3	BQ-4	BQ-5	BQ-6	BQ + rU-1	BQ + rU-2	BQ + rU-3	BQ + rU-4	BQ + rU-5	BQ + rU-6			Raw area under peak
uridine	6407310	5389892	4996075	6649375	4972950	5025785	240104	476772	312040	490677	465783	450526	7132646	7282520	7548655	6716818	6820085	7652702	5.57356e+06
cytidine	16644572	14658603	14544523	15142288	15875347	16259273	1353249	1602793	1494142	1618732	1716807	1759204	16529839	18901058	20556258	19077664	19230552	20197650	1.55208e+07
UMP	21752282	14160579	19681896	21425554	18359490	16212477	1845676	3338575	1978929	1959686	1928693	2570811	15707968	17419876	14885666	16278894	12751877	13607536	18598713
CMP	27853622	21454076	25070480	27752788	26990140	25598982	5024690	4963610	3660820	5129956	4141120	5687556	27715832	27295912	29762290	28437306	27644928	30578070	2.57867e+07
UTP	235687200	222561456	190203520	190029248	211364928	260224896	20056414	11667448	8609782	6686947	5547380	7719851	185195008	194507744	218579216	202619168	183363968	199155488	218345208
CTP	79690624	94279736	97778512	98078304	109669664	110683208	16748078	11392014	11203209	9098604	9686770	9436639	92311072	97602600	95018984	100672136	96898464	111197584	9.83633e+07
																					Normalized to control average
	Control-1	Control-2	Control-3	Control-4	Control-5	Control-6	BQ-1	BQ-2	BQ-3	BQ-4	BQ-5	BQ-6	BQ + rU-1	BQ + rU-2	BQ + rU-3	BQ + rU-4	BQ + rU-5	BQ + rU-6
Uridine	1.14959	0.967046	0.896388	1.19302	0.892239	0.901718	0.0430791	0.0855417	0.0559857	0.0880365	0.08357	0.0808327	1.27973	1.30662	1.35437	1.20512	1.22365	1.37304
Cytidine	1.07241	0.944451	0.937101	0.975615	1.02285	1.04758	0.0871896	0.103268	0.0962673	0.104295	0.110614	0.113345	1.06501	1.21779	1.32444	1.22917	1.23902	1.30133
UMP	1.16956	0.761374	1.05824	1.15199	0.987138	0.871699	0.0992368	0.179506	0.106401	0.105367	0.1037	0.138225	0.844573	0.936617	0.80036	0.87527	0.685632	0.731639
CMP	1.08016	0.831983	0.972226	1.07625	1.04667	0.992721	0.194856	0.192487	0.141966	0.198938	0.160591	0.220562	1.07481	1.05853	1.15417	1.10279	1.07206	1.18581
UTP	1.07942	1.01931	0.871114	0.870316	0.968031	1.1918	0.0918564	0.0534358	0.039432	0.0306256	0.0254065	0.0353562	0.848175	0.890827	1.00107	0.927976	0.839789	0.912113
CTP	0.810166	0.958484	0.994054	0.997102	1.11494	1.12525	0.170267	0.115816	0.113896	0.0924999	0.0984795	0.0959365	0.93847	0.992266	0.966	1.02347	0.985107	1.13048

## Sheet: Figure 2C and S2B-D
	Figure 2C
			Vehicle-1	Vehicle-2	Vehicle-3	BQ-1	BQ-2	BQ-3	BQ + rU-1	BQ + rU-2	BQ + rU-3
		H2-Db	0.893446	0.912282	1.22688	3.45856	3.74552	3.82054	1.37116	1.52552	1.37707
		H2-Kb	1.09805	0.947713	0.960948	18.0218	15.3188	19.8977	1.81944	1.52332	1.44124
		B2m	1.09934	0.957603	0.949914	2.9941	3.28155	2.37153	1.41368	1.47202	not detected
		Tap1	0.77693	1.5295	0.841528	12.0158	12.3268	11.3804	1.37673	0.986605	1.60594
		Nlrc5	0.61299	1.37403	1.18727	3.95	4.82294	5.1759	1.72056	1.96174	0.956004
	Figure S2B, left		Vehicle-1	Vehicle-2	Vehicle-3	Ter-1	Ter-2	Ter-3	Ter + rU-1	Ter + rU-2	Ter + rU-3
		H2-Db	0.833874	1.37039	0.795735	1.87178	2.75139	2.78424	0.354929	0.963672	0.65225
		H2-Kb	0.803746	1.47821	0.71804	2.37199	2.30511	2.76185	0.471461	1.4424	0.604918
		B2m	1.44436	0.863488	0.692153	2.28198	1.27319	1.66639	1.20122	1.08724	0.882051
	Figure S2B, right		Vehicle-1	Vehicle-2	Vehicle-3	Vehicle-4	Ter-1	Ter-2	Ter-3	Ter-4	Ter + rU-1	Ter + rU-2	Ter + rU-3	Ter + rU-4
		Nlrc5	1.18545	1.05886	0.71459	1.11486	19.7252	23.9512	18.1902	17.2442	2.11738	1.04075	1.31091	1.13145
		Tap1	1.14617	0.89422	0.92831	1.05102	16.0143	13.781	13.8418	14.8854	0.97774	1.57364	0.99376	1.36855
	Figure S2C
			Vehicle-1	Vehicle-2	Vehicle-3	Vehicle-4	rU-1	rU-2	rU-3	rU-4
		H2-Db	0.967482	1.02788	1.00558	not performed	0.983366	1.2139	1.15049	not performed
		H2-Kb	0.982604	0.982972	1.03533	not performed	1.04924	0.973722	0.831834	not performed
		B2m	1.03994	1.08657	0.884975	not performed	0.848032	0.903934	0.7504	not performed
		Nlrc5	1.10121	0.841006	1.22168	0.883839	1.14188	0.7818	1.24442	0.62069
		Tap1	0.842264	1.27082	1.04655	0.892703	1.20543	1.12606	1.3429	0.90549
	Figure S2D		Vehicle-1	Vehicle-2	Vehicle-3	BQ-1	BQ-2	BQ-3	BQ + rU-1	BQ + rU-2	BQ + rU-3
		HLA-A	0.692587	1.02169	1.28572	2.89327	3.60639	3.38727	0.887155	0.673751	1.29964
		HLA-B	0.533159	0.970489	1.49635	3.45356	6.05507	6.14069	0.683326	0.45266	1.75347
		HLA-C	0.926207	1.02948	1.04431	3.1261	3.97949	3.41325	0.906522	0.761274	1.40168
		B2M	0.712697	0.77566	1.51164	5.68351	5.40811	4.09411	0.479887	0.785205	1.60105
		TAP1	1.01793	0.979648	1.00242	16.5085	12.4078	8.37127	1.07139	1.13417	1.32668
		TAP2	0.834967	1.35767	0.807361	3.76513	5.88672	2.18779	0.876718	1.39203	1.27121

## Sheet: Figure 2D and S2E
	Figure 2D
		Vehicle	BQ (10µM)	BQ + rU	Ter (100µM)	Ter + rU
		1.00093	2.17658	1.06877	2.73792	1.10409
		1.00836	2.50929	1.06413	2.55297	1.04461
		0.990706	2.55762	1.05483	2.7974	1.04275
	Figure S2E
		Vehicle	rU (1mM)
		1.00093	1.03532
		1.00836	1.05204
		0.990706	1.04833
		Please note: the Vehicle control is shared between Figure 2D and Figure S2E because all six experimental groups were run in parallel, they are represented in separate figure panels for clarity

## Sheet: Figure 2E
			sgNT-1	sgNT-2	sgNT-3	sgDHODH-1	sgDHODH-2	sgDHODH-3	sgDHOHD + BQ-1	sgDHOHD + BQ-2	sgDHOHD + BQ-3	sgDHOHD + rU-1	sgDHOHD + rU-2	sgDHOHD + rU-3
		HLA-A	1.02873	1.03199	0.992014	4.32709	4.07707	3.65322	3.61718	3.57316	3.08755	0.941945	1.05849	1.03415
		HLA-B	1.10323	0.920061	0.570671	8.64262	10.0276	9.99962	8.62472	8.43602	9.28933	0.98518	1.20012	1.10473
		HLA-C	1.005	1.13564	1.05012	7.29232	7.02258	4.87112	5.53929	5.14679	3.93674	0.87618	1.24756	not detected

## Sheet: Figure 2F
			HLA-A	HLA-A	HLA-A	HLA-A	HLA-B	HLA-B	HLA-B	HLA-B	HLA-C	HLA-C	HLA-C	HLA-C	B2M	B2M	B2M	B2M	TAP1	TAP1	TAP1	TAP1
		IFNy	2.5105	2.5686	2.3983	2.0705	2.6181	2.9455	3.4188	2.6694	5.577	5.2252	4.6316	4.1916	3.2705	2.911	3.2277	3.7334	15.9723	13.7133	14.425	12.7683
		Brequinar	6.401	6.2381	6.3583	6.1526	6.5134	6.6273	1.2496	6.6987	13.1591	12.708	9.5757	9.0226	13.4507	15.5014	14.0508	14.7688	8.9002	8.1623	9.4145	8.0176
		Teriflunomide	2.0752	2.4747	0.8399	1.8846	2.3567	1.8683	2.4567	2.2404	2.2732	2.5664	1.8059	2.8834	3.14	2.8714	3.1096	3.417	3.1118	3.6294	3.2892	2.383
		GSK983	1.2962	1.0219	1.0922	1.1747	1.2859	1.3945	1.1964	1.2993	1.5754	1.5776	1.7774	1.3772	1.4598	1.3573	1.3984	1.4307	1.8248	1.8147	1.8529	1.8426
		Mycophenolate	2.9506	2.4111	2.6365	2.3907	2.018	1.8381	2.0266	2.0995	2.601	2.0917	2.2028	1.8441	not detected	2.5724	2.4845	2.3838	3.6578	2.9578	2.7688	2.9421
		5-FU	0.6708	0.6263	0.6177	0.5872	0.5769	0.5619	0.6265	0.5443	0.3692	0.4357	0.4735	0.4555	0.891	0.63	0.5316	0.594	0.9211	0.8371	0.9589	0.8595
		Methotrexate	0.9563	0.939	0.8342	0.8936	0.7095	0.8026	0.7194	0.7244	1.0197	1.0874	0.9381	1.0067	not detected	1.1838	1.1375	1.1187	1.21	1.0634	1.1661	1.1317
		Hydroxyurea	0.8265	0.6011	0.7003	0.6561	0.6424	0.6739	0.5795	0.6776	0.6259	0.5764	0.7785	0.5762	not detected	0.7448	0.7857	0.8411	0.8792	0.6599	0.7064	0.7057
		Oxaliplatin	1.3184	1.0394	1.062	0.9137	1.0601	1.0419	1.2127	1.1722	0.8768	0.9197	0.8215	0.8641	0.9919	0.8977	0.9429	0.8428	1.0594	1.2416	1.2633	1.0675
		Irinotecan	0.782	0.9755	0.8921	0.9721	0.9175	0.92	1.0344	0.8986	1.1589	1.1469	1.2056	1.3257	1.2301	0.9813	1.5302	1.0627	2.5223	1.5494	1.603	1.7725
		Gemcitabine	0.5211	0.63	0.573	0.6077	0.5494	0.7315	0.7175	0.6873	0.9402	0.9107	1.0905	0.5832	0.4948	0.9599	0.7711	0.7615	0.9945	1.0056	0.7851	1.0905
		Paclitaxel	0.8699	0.7305	0.6935	0.7003	0.8601	0.7389	0.7503	0.7369	0.7545	0.6734	0.8047	0.7187	1.0363	0.9934	0.8424	0.9941	0.9003	1.1847	1.0714	0.8097
		Cytarabine	0.9897	0.6489	0.595	0.5606	0.6523	0.5037	0.896	0.6491	0.8879	0.5948	0.798	0.5451	0.7687	0.7762	1.1169	0.7746	0.7293	1.0171	0.88	0.7876
		Azacytidine	0.3808	0.4075	0.3483	0.3629	0.2509	0.3097	1.5895	0.3656	0.3826	0.4811	0.3623	0.378	0.3556	0.4957	0.3419	0.3867	0.6349	0.6089	0.5583	0.691
		Trametinib	0.8415	1.0175	1.0951	1.2	1.3458	1.4535	1.3027	1.229	2.4091	2.6363	2.8177	2.4941	1.4799	1.4364	1.4666	1.53	1.5363	1.8258	1.9855	1.403
		Mithramycin	1.2471	1.0436	1.1477	0.9933	0.8604	0.9528	0.8009	1.0071	1.1658	1.1872	1.1163	0.9588	1.182	1.2762	1.2672	1.1014	1.0983	1.0427	1.2602	0.9892
		WP1066	0.9218	0.7684	0.8244	0.7964	0.704	0.7092	1.5398	0.6995	1.1602	0.9753	1.1347	0.9923	0.9456	1.1478	1.1889	1.3361	1.0983	1.137	0.71	0.9584
		Dactolysib	0.9434	0.9842	0.8743	0.9353	0.935	0.9998	0.5154	0.951	1.27	1.1859	1.0525	0.9536	1.0496	1.3227	1.0648	1.3875	0.8084	0.885	0.7892	0.9106
		Rapamycin	1.3671	1.3536	1.1816	1.3083	1.2684	1.1615	1.3407	1.1647	1.5477	1.4354	1.3262	1.2001	not detected	1.5856	1.4261	1.5784	0.9392	1.1551	1.0227	1.0179
		Erlotinib	0.6258	0.6867	0.6805	0.771	0.6383	0.658	0.6521	0.8755	0.9608	0.7102	0.8335	0.9495	0.8266	0.8504	0.5607	0.8124	1.1569	0.9384	0.9769	0.9403

## Sheet: Figure S2F
			Vehicle-1	Vehicle-2	Vehicle-3	Vehicle-4	MPA-1	MPA-2	MPA-3	MPA-4
		H2-Db	0.914	0.852	1.2534	1.0246	2.3144	1.9659	2.2808	2.1895
		H2-Kb	1.0893	1.0701	0.858	not detected	3.7486	4.0821	2.8331	2.3581
		Nlrc5	0.8235	not detected	0.9253	1.3124	19.4437	17.5806	6.7617	17.5089
		Tap1	0.5864	1.3811	1.2607	0.9793	54.1	56.0275	55.978	58.9167
