# Supplementary material for: DHODH inhibition enhances the efficacy of immune checkpoint blockade by increasing cancer cell antigen presentation
Source: eLife. 2024 Jul 8;12:RP87292. doi: 10.7554/eLife.87292 (PMC11230627; doi:10.7554/eLife.87292)
Supplement: Figure 3—source data 1. [file elife-87292-fig3-data1.xlsx]

## Sheet: Figure 3A
		Treatment	Replicate #	HLA-A	HLA-B	HLA-C
		BQ (10uM)	1	4.72793	4.89306	2.40889
			2	4.78697	4.90741	4.21875
			3	4.19822	5.1757	4.15601
			4	4.04784	4.83082	3.94884
		BQ + Rux (2.5uM)	1	6.92846	7.38021	5.47586
			2	6.31265	6.90161	4.90772
			3	5.65538	7.8404	6.24103
			4	4.96348	6.44093	5.7373
		BQ + BMS (7.5uM)	1	2.55807	1.29133	2.12518
			2	2.51778	1.11419	1.9731
			3	2.15851	1.4114	2.23501
			4	1.93964	1.24704	2.3337
		BQ + TPCA-1 (10uM)	1	6.95356	7.68058	6.18347
			2	5.20521	6.47505	5.68162
			3	5.82324	7.57573	6.70267
			4	4.49253	7.19026	6.05209
		BQ + GSK8612 (20uM)	1	6.08703	8.74147	9.35159
			2	6.43619	8.34079	10.2932
			3	6.61636	8.47416	9.05022
			4	6.54824	7.45261	7.84617
		BQ + WP1066 (1.5uM)	1	7.24075	6.67057	7.92531
			2	6.15119	5.7317	8.87992
			3	6.01484	7.28515	8.70739
			4	7.61579	7.01676	8.0887
		BQ + AZ20 (1uM)	1	10.0421	10.261	10.952
			2	10.7277	10.0015	12.9872
			3	8.80919	10.6546	13.7719
			4	8.97133	11.7224	13.388
		BQ + Olaparib (50uM)	1	8.69618	8.43125	10.1052
			2	9.20871	7.61669	9.13743
			3	8.26257	8.74967	11.1938
			4	8.09983	9.94696	10.7116
		BQ + Thiamet G (5uM)	1	6.30687	8.41994	6.99673
			2	6.69031	8.60867	8.48316
			3	6.74328	10.249	11.4088
			4	6.37001	8.28691	10.1646

## Sheet: Figure 3B
	Treatment	Replicate #	HLA-A	HLA-B	HLA-C	B2M	TAP1	TAP2	TAPBP	STAT1
	Vehicle	1	0.996155	1.00883	0.903933	1.2922	1.2383	0.904255	1.02608	0.803282
		2	0.866063	0.92827	1.01861	0.852341	0.753302	0.807907	0.935231	1.14533
		3	1.02039	1.04326	1.05726	1.09885	1.2936	1.19321	1.10288	1.10907
		4	1.13595	1.02356	1.02725	0.826267	0.828719	1.14718	0.944864	0.980036
	BQ (10uM)	1	4.69345	5.4389	2.99558	6.11025	2.09392	1.6299	2.51041	2.50916
		2	4.75032	5.57001	5.23999	7.31328	2.99272	2.0469	2.37365	4.38221
		3	4.3617	5.69061	4.72814	6.46556	3.22125	1.91025	2.60275	4.32144
		4	4.48422	5.4991	4.83192	5.86093	2.72783	1.90175	1.90551	4.86038
	BQ + BMS (2.5uM)	1	4.53874	6.0566	3.90281	9.86248	4.2696	2.34751	2.14869	5.79207
		2	4.09469	5.20531	4.05854	6.90698	3.92423	2.33314	1.92921	5.61083
		3	3.80944	5.21546	3.67378	9.80857	3.45173	2.11325	2.29513	6.09742
		4	4.13269	5.10702	3.95295	9.93495	4.61768	2.14282	2.2395	6.03329
	BQ + BMS (10uM)	1	1.40419	1.32795	1.6552	1.74661	0.898412	0.530798	1.30579	0.856327
		2	1.5975	1.61646	1.65835	3.30662	0.938146	0.645481	1.29168	0.880506
		3	1.75301	1.46372	1.5659	3.28717	1.1205	0.777105	1.27868	0.829147
		4	1.49941	1.4814	1.65255	3.31123	1.23192	0.806049	1.48729	0.889469
	BQ + BMS (40uM)	1	1.80307	1.6304	1.80289	4.39188	1.78957	0.938353	2.43221	1.4228
		2	1.63987	1.43549	1.56088	1.87633	1.10298	0.772057	1.98496	1.35983
		3	1.5589	1.7078	1.52393	2.79218	1.40338	0.76979	2.2917	1.42695
		4	1.43135	1.54235	1.43424	3.01105	0.965151	0.705925	2.19625	1.3292
	Ter (100uM)	1	5.02673	3.5951	4.10664	5.85639	3.8272	2.33387	3.49384	4.89259
		2	3.39142	3.66567	4.09302	4.70499	2.3151	2.61559	3.31192	5.35871
		3	3.32698	3.45547	4.50118	5.76129	3.77914	2.22983	3.69821	5.01056
		4	2.95347	3.88861	3.74853	5.45604	3.77398	2.21321	3.7181	4.73215
	Ter + BMS (2.5uM)	1	6.1421	7.75047	5.85282	6.60416	6.35413	2.04904	2.63103	4.77815
		2	6.08977	7.84483	5.55977	7.22695	5.08169	2.66966	2.37667	4.70432
		3	6.65217	8.16137	5.13217	6.08992	5.55755	2.42699	2.70588	4.56878
		4	5.10413	7.39521	4.89522	7.21688	5.72658	2.77241	2.57992	4.6925
	Ter + BMS (10uM)	1	2.01394	2.50435	2.00833	2.48609	0.826458	0.605977	1.03993	0.762656
		2	1.88705	1.96542	1.72502	2.15476	0.769811	0.493967	0.907447	0.568191
		3	2.06377	2.61258	1.8853	2.39006	1.02179	0.550118	1.3785	0.680034
		4	1.75646	2.45892	1.776	2.19394	0.57384	0.497385	1.16542	0.864683
	Ter + BMS (40uM)	1	1.31979	1.4379	1.25232	2.05796	1.20479	0.461482	1.40983	1.06357
		2	1.47235	1.43112	1.41005	2.23494	0.963099	0.574275	1.45433	0.934336
		3	1.7432	1.67301	1.25352	1.98621	1.01403	0.782622	1.66021	1.1202
		4	1.61666	1.55352	1.26132	2.03362	0.980641	0.653657	1.559	1.02288

## Sheet: Figure 3C
Figure 3C, top
	Treatment	Replicate #	H2-Db	H2-Kb	B2M
	BQ (10µM)	1	2.36723	9.76538	2.18752
		2	2.36031	12.4067	2.33251
		3	2.38222	8.86598	1.42569
	BQ + Uridine (1mM)	1	1.03062	0.971309	0.863246
		2	0.784343	0.867812	0.866783
		3	0.828467	0.876538	0.750624
	BQ + BMS (10µM)	1	0.95695	1.94217	0.616983
		2	0.904295	1.52986	0.636812
		3	0.917773	1.32815	0.550887
	BQ + TPCA-1 (10µM)	1	1.59154	20.5658	1.39797
		2	1.56584	12.0332	1.47518
		3	1.67267	13.2499	1.39226
	BQ + GSK8612 (20µM)	1	2.289	30.9901	2.23005
		2	2.23324	25.8764	2.01889
		3	2.49227	24.4327	2.43835
Figure 3C, bottom
	Treatment	Replicate #	H2-Db	H2-Kb	B2M
	Poly(dA:dT) 2ug	1	29.2165	45.1582	13.0046
		2	30.0721	44.8328	11.6089
		3	33.1563	46.1065	11.424
	Poly(dA:dT) + BMS (10uM)	1	3.2066	7.3973	1.41586
		2	2.25083	6.86788	1.07724
		3	2.38226	7.21771	1.33147
	Poly(dA:dT) + TPCA-1 (10uM)	1	3.5867	9.61709	0.87525
		2	4.79634	10.2422	0.847957
		3	4.19747	5.44091	0.752294
	Poly(dA:dT) + GSK8612 (20uM)	1	2.97145	8.12005	2.04832
		2	3.24188	7.35944	1.82109
		3	3.14865	5.63779	1.59916

## Sheet: Figure 3D
			Vehicle-1	Vehicle-2	Vehicle-3	BQ-1	BQ-2	BQ-3	BQ + BMS-1	BQ + BMS-2	BQ + BMS-3
		HLA-A	0.542346	1.18681	1.55361	4.52507	5.19988	5.3973	2.94347	2.30194	2.34045
		HLA-B	0.702956	1.31461	1.08212	3.95898	4.92489	5.31667	2.1977	1.95065	1.46994
		HLA-C	0.456152	1.64136	1.33563	5.35878	7.89754	8.25056	2.52193	3.40728	3.25562
		B2M	0.846817	1.23459	0.956505	5.39933	7.17358	9.39671	2.7816	1.97151	1.7541
		TAP1	1.01492	1.0591	0.930319	4.81857	4.70044	5.82877	0.766924	0.694809	0.632436
		TAP2	1.08965	0.920125	0.99739	5.11485	5.49034	5.44302	0.852759	0.778886	0.717857
		TAPBP	1.01556	1.00481	0.979958	2.74598	2.17348	3.09799	0.866389	0.746082	0.826243
		CCL5	0.945982	1.21049	0.873285	3.4144	2.32977	2.88149	0.657594	0.685869	0.675252

## Sheet: Figure 3E
			Vehicle-1	Vehicle-2	Vehicle-3	BQ-1	BQ-2	BQ-3	BQ + BMS-1	BQ + BMS-2	BQ + BMS-3
		HLA-A	0.827149	1.00057	1.20828	5.09203	6.72338	6.70508	3.32615	1.98317	3.10875
		HLA-B	1.44111	0.777128	0.892917	13.7571	10.2271	9.63697	2.62062	3.45642	2.58687
		HLA-C	0.964484	0.973184	1.06539	6.65673	9.05893	6.02922	4.16182	3.41115	3.39732
		B2M	0.712697	0.77566	1.51164	5.68351	5.40811	4.09411	2.13605	2.35278	1.85821
		TAP1	1.01793	0.979648	1.00242	16.5085	12.4078	8.37127	2.06321	1.48762	0.835864
		TAP2	0.834967	1.35767	0.807361	3.76513	5.88672	2.18779	2.20324	2.22913	1.70847

## Sheet: Figure 3G
			Vehicle-1	Vehicle-2	Vehicle-3	BQ-1	BQ-2	BQ-3	BQ + BMS-1	BQ + BMS-2	BQ + BMS-3
		HLA-A	0.998049	1.03672	0.966467	5.79531	4.84911	7.26584	2.94544	3.57425	3.25641
		HLA-C	0.998501	0.965295	1.03751	5.46759	5.29583	7.48511	2.66595	2.83011	3.78989
		B2M	1.23102	1.01737	0.798461	12.589	16.437	14.9336	2.45625	3.18052	5.77721
		TAP1	1.08735	1.09389	0.84073	4.20514	4.64877	4.53672	1.05277	1.13862	1.52847
		NLRC5	1.01782	1.21647	0.807663	3.0558	3.68692	3.01154	1.99865	1.42164	2.39024

## Sheet: Figure S3A
		Time (hours)	HLA-A	HLA-A	HLA-A	HLA-A	HLA-B	HLA-B	HLA-B	HLA-B	HLA-C	HLA-C	HLA-C	HLA-C
		0	1.02811	0.97806	0.97198	1.02314	1.12936	0.84763	1.03347	1.0108	1.02456	1.00626	0.97806	0.99172
		0.5	0.68849	0.95893	0.83191	0.8873	0.8827	0.8944	0.84499	0.85263	0.61792	0.58621	0.55153	0.57335
		1	1.14215	1.00748	1.05757	0.98606	1.0594	0.92997	1.12214	1.05427	0.71586	0.74111	0.71042	0.68765
		4	3.29265	2.86047	2.88636	2.74775	2.8123	2.70148	2.77935	2.72027	2.46955	2.40869	2.31378	2.48156
		8	3.82975	3.49732	3.64584	3.72761	2.93376	2.43978	3.1226	2.97677	2.51621	2.18139	2.68934	2.33796
		24	6.63341	8.46641	7.95438	8.17801	7.30179	7.04329	8.24346	7.0972	6.23224	5.2443	6.41634	5.88381

## Sheet: Figure S3B
	Figure S3B, left
		Vehicle	poly(dA:dT) 2ug	DNA + GSK8612 (20uM)	DNA + Rux (1uM)	DNA + TPCA-1 (20uM)	IFNy 10ng/ml	IFNy + Rux	IFNy + TPCA-1
		not detected	203.441	0.78844	5.24492	4.28458	120.031	1.02192	not detected
		1.13911	163.037	1.1294	10.7872	8.49228	149.326	1.98944	2.69628
		0.9548	179.086	4.41187	6.385	1.27833	115.593	1.15918	1.46987
		0.91944	180.021	1.3419	8.68927	5.28456	146.845	1.28086	1.1679
	Figure S3B, right
		Vehicle	poly(dA:dT) 2ug	DNA + GSK8612 (20uM)	DNA + Rux (1uM)	DNA + TPCA-1 (20uM)	IFNy 10ng/ml	IFNy + Rux	IFNy + TPCA-1
		0.92294	80.125	0.92264	6.53662	2.54755	18.9621	0.53383	0.9194
		1.00867	50.614	1.43032	6.65028	2.37747	25.7758	0.47072	0.77344
		1.21388	67.1648	1.46649	5.53392	2.98372	15.7632	0.6867	0.56114
		0.88491	58.6127	1.34759	5.3855	2.39232	20.5323	0.51764	0.69786

## Sheet: Figure S3C
	Figure S3C
			HLA-A	HLA-A	HLA-A	HLA-A	HLA-B	HLA-B	HLA-B	HLA-B	HLA-C	HLA-C	HLA-C	HLA-C	B2M	B2M	B2M	B2M	CCL5	CCL5	CCL5	CCL5
		Vehicle WT	1.13043	0.83141	0.99863	1.06545	1.08459	1.03628	1.15925	0.7675	1.15234	0.70312	1.2079	1.02178	1.0065	0.91427	1.02328	1.06199	0.93038	1.27806	0.88227	0.95321
		Vehicle KO	1.10177	1.08489	1.04737	1.06619	1.57996	1.64387	1.48096	1.01562	1.06882	0.83564	0.95555	0.90812	0.91982	1.06238	1.15233	1.53998	0.03982	0.0863	0	0.08254
		BQ WT	6.25568	6.4658	5.2715	5.92536	2.96078	4.63117	5.67742	4.7225	4.3042	4.16308	3.88575	4.21837	2.64391	2.73133	2.91387	3.0556	2.06233	4.96936	4.35623	3.91576
		BQ KO	4.68784	5.9649	5.24968	6.41771	3.94221	6.77549	6.01464	5.85871	6.65111	10.2117	7.057	6.93643	1.9942	3.57902	3.72432	2.9318	0.86662	0.69467	0	0.43434
		Ter WT	5.58694	6.06565	5.27428	6.03182	5.37709	4.16036	4.01377	3.47393	2.57071	4.11055	3.7553	2.79615	2.38718	2.35962	2.42393	2.84252	4.63248	3.22201	3.21308	3.02057
		Ter KO	6.48359	5.88398	5.43087	5.042	4.20185	5.69289	4.38583	5.65655	4.69971	5.52366	4.59374	5.26159	3.11748	3.46612	2.77421	3.48947	0.28977	0.41508	0	0
		GSK983 WT	10.1998	7.68556	7.09972	6.65816	7.41216	5.28937	6.77501	5.14765	4.99525	5.11128	5.2418	4.36998	4.1468	4.11905	5.4796	3.93226	7.21204	7.19918	11.1666	5.82701
		GSK983 KO	8.13741	7.56956	7.01993	6.31846	7.56052	7.40797	6.46904	6.39493	7.35176	8.96288	6.18712	7.03701	3.24563	3.68543	3.44878	3.586	0.0714	0.14108	0.273	0.12102
		TNFa WT	1.10177	1.08489	1.04737	1.06619	2.67675	1.8661	2.73519	2.3526	2.57328	2.08685	2.414	1.5491	1.69564	1.98339	1.76903	2.13356	17.2413	11.5195	14.2749	13.2559
		TNFa KO	0.67301	0.80543	0.84983	0.71809	1.31879	0.81485	1.37568	1.07162	1.00409	1.42842	0.80453	0.84084	1.09041	1.04664	1.1883	1.02191	0	0	0	0
