# Supplementary material for: DHODH inhibition enhances the efficacy of immune checkpoint blockade by increasing cancer cell antigen presentation
Source: eLife. 2024 Jul 8;12:RP87292. doi: 10.7554/eLife.87292 (PMC11230627; doi:10.7554/eLife.87292)
Supplement: Figure 4—source data 1. [file elife-87292-fig4-data1.xlsx]

## Sheet: Figure 4A
	Target kinase protein	Percent inhibition	negative log(Kd)
	IKKB	99.4	6.88606
	YSK4	84	6.58503
	CDC2L2	99	6.40894
	CDC2L1	99	6.37675
	ERK5	99.3	6.20761
	CDK7	93.7	6.16749
	MYLK4	91.2	6.1549
	CDC2L5	95.3	6.09691
	CDK16	48	6.05061
	ERN1	12	6
	DCAMKL3	24	5.76955
	IKKA	14	5.76955
	CDK9	65	5.72125
	TYK2(JH2domain-pseudokinase)	85	5.69897
	DYRK2	91.2	5.67778
	RPS6KA4(Kin.Dom.2-C-terminal)	85	5.63827
	RSK1(Kin.Dom.2-C-terminal)	54	5.48149
	KIT(L576P)	72	5.40894
	ERK3	73	5.36653
	ERK8	81	5.34679
	KPCD1	53	5.33724
	KIT(V559D)	77	5.24413
	STK36	72	5.18709
	RSK4(Kin.Dom.2-C-terminal)	60	5.17393
	HIPK4	59	5.09151

## Sheet: Figure 4B
	Treatment	Replicate #	HLA-A	HLA-B	HLA-C
	Vehicle	1	0.664987	0.771385	0.792481
		2	0.645849	0.667686	0.790113
		3	1.68916	1.56093	1.41741
	BQ (10uM)	1	4.96608	7.49934	3.17373
		2	4.58885	7.65096	3.33493
		3	7.48676	8.80581	3.63109
	BQ + Flavo (1uM)	1	1.29997	1.30745	0.922032
		2	0.966805	1.31275	0.936168
		3	1.37999	1.27492	0.987427
	BQ + AT7519 (1uM)	1	1.14022	1.41353	0.863024
		2	0.908546	1.1221	0.846673
		3	1.77811	1.70081	0.967437
	BQ + Dinaciclib (1uM)	1	0.929287	1.19973	0.906943
		2	0.804876	1.11059	0.848324
		3	1.83714	1.78995	1.1453
	BQ + PROTAC2 (1uM)	1	1.59389	1.94356	1.39761
		2	1.32916	1.77346	0.923212
		3	1.73417	1.85921	1.12646
	BQ + PROTAC2 (10uM)	1	1.22888	1.30774	1.03461
		2	0.879384	1.22008	1.12524
		3	0.590394	0.660448	0.937019

## Sheet: Figure 4C
Figure 4C																												0.945033	1.167
	Treatment	Replicate #	HLA-A	HLA-B	HLA-C																							0.942918	1.32715
	Vehicle	1	1.13491	1.27582	1.15719																							0.854276	0.986398
		2	1.08296	0.957589	0.985194
		3	0.782138	0.766592	0.857614
	BQ (10uM)	1	4.0264	5.15369	2.98442
		2	4.56878	4.45399	2.81318
		3	3.45568	5.14745	3.14614
	BQ + PROTAC2 (1uM)	1	1.70618	2.01121	1.40202
		2	1.19904	1.29271	0.948996
		3	2.01994	2.1224	1.41171
	BQ + PROTAC2 (1uM) + POM	1	3.50584	5.01469	3.52737
		2	3.10689	3.31187	1.77335
		3	2.68427	3.99332	2.55695
	BQ + PROTAC2 (10uM) + POM	1	0.945033	0.942918	0.854276
		2	1.167	1.32715	0.986398
		3	1.12748	1.11771	1.11812

## Sheet: Figure 4E
	Treatment	Replicate #	HLA-A	HLA-B	HLA-C
	Vehicle	1	0.714979	0.69348	0.634059
		2	1.09152	1.32687	1.22158
		3	1.1935	0.979647	1.14436
	BQ (10uM)	1	3.1237	3.46022	2.55284
		2	3.64594	6.02428	3.21473
		3	4.97995	5.74292	2.78823
	BQ + Flavo (1uM)	1	1.13951	0.992793	1.03978
		2	1.77277	1.51436	1.55296
		3	1.80718	1.92143	1.47847
	BQ + AT7519 (1uM)	1	0.982192	0.708439	0.6919
		2	1.52082	1.24184	1.18746
		3	1.54277	1.2802	0.966474
	BQ + Dinaciclib (1uM)	1	1.64374	1.08138	1.12316
		2	1.48784	1.26049	1.40106
		3	2.20483	1.54958	1.12345
	BQ + PROTAC2 (1uM)	1	2.29966	2.13545	1.95152
		2	2.77703	5.31289	2.9796
		3	3.19629	4.62547	2.89661
	BQ + PROTAC2 (10uM)	1	2.74128	2.98887	3.0217
		2	2.86627	4.55578	3.35596
		3	4.06668	7.29612	2.9796

## Sheet: Figure S4A
			HLA-A	HLA-A	HLA-A	HLA-B	HLA-B	HLA-B	HLA-C	HLA-C	HLA-C
		Vehicle	0.950513	1.05206	not detected	0.837991	1.12346	1.0622	1.0066	0.987461	1.00606
		Vehicle + Flavo	1.61635	1.58788	1.32553	1.26531	1.24412	1.08384	1.4147	1.51497	1.66503
		BQ	7.76884	7.60414	7.00709	8.53139	6.61127	3.38349	6.64104	6.62895	6.20327
		BQ + Flavo	2.9255	2.56085	2.60173	2.23307	2.06986	2.17218	2.98657	2.75346	3.32112
		Ter	5.27853	6.64581	5.79228	9.34498	6.54358	6.60937	5.09634	5.23102	5.62008
		Ter + Flavo	1.53135	1.85102	2.37084	1.7735	1.4613	1.57313	2.06391	2.25167	2.20172
		GSK983	5.63016	5.92259	5.51168	10.4065	10.1937	9.93569	7.91024	7.88101	7.52676
		GSK983 + Flavo	2.17022	2.46366	2.30211	2.92764	2.32179	1.91393	2.36661	2.56552	2.87061
		MPA	4.16111	4.29798	4.09904	8.61788	11.1347	8.91929	17.5119	16.2902	12.9128
		MPA + Flavo	1.12358	1.39138	1.26837	1.32326	1.48871	1.3829	3.57097	3.54208	3.15938
		3-deazauridine	3.10026	2.71844	2.82238	7.67409	7.27913	6.3372	7.45612	6.82644	7.42521
		3-deazauridine + Flavo	0.835088	1.03724	1.12053	0.809078	1.04002	0.972735	2.26766	1.64764	1.9463
