# Supplementary material for: DHODH inhibition enhances the efficacy of immune checkpoint blockade by increasing cancer cell antigen presentation
Source: eLife. 2024 Jul 8;12:RP87292. doi: 10.7554/eLife.87292 (PMC11230627; doi:10.7554/eLife.87292)
Supplement: Figure 5—source data 1. [file elife-87292-fig5-data1.xlsx]

## Sheet: Figure 5A
	Mouse ear tag #	Mouse designation	Day 8	Day 12	Day 16	Day 20		Day refer to days post-implantation, treatment started on day 7
	762	Vehicle-1	33.6	97.9776	132.756	221.4		Volume estimated by V = 0.5 x (long dimension) x (short dimension squared)
	763	Vehicle-2	33.6	138.384	236.903	431.964		Subcutaneous tumors measured by digital calipers
	764	Vehicle-3	23.976	69.696	107.898	137.041
	765	Vehicle-4	28.88	55.5425	75.0157	117.5
	766	Vehicle-5	43.4515	131.22	216.858	344.45
	772	BQ-1	32.8	5.23757	50.2392	60.7475
	773	BQ-2	35.2	11.4377	40.9271	21.142
	776	BQ-3	39.69	19.22	16.5511	58.6321
	777	BQ-4	11.2995	8.993	23.2654	116.463
	778	BQ-5	37.044	16.3995	43.9563	52.3406

## Sheet: Figure 5B
			Figure 5B, left	Figure 5B, right
	Mouse ear tag #		Tumor weight (mg)	Tumor volume (mm^3)		Weight measured directly with digital scale
	762	Vehicle-1	520	581.83		Volume estimated by measuring the three longest dimensions with digital calipers after tumor was dissected out; V = (dimension 1) x (dimension 2) x (dimension 3)
	763	Vehicle-2	210	234.638
	764	Vehicle-3	400	283.392
	765	Vehicle-4	370	258.5
	766	Vehicle-5	1260	800.795
	772	BQ-1	88	102.108
	773	BQ-2	29	38.192
	776	BQ-3	93	88.074
	777	BQ-4	129	199.045
	778	BQ-5	85	84.3474

## Sheet: Figure 5C
		ear tag #	762	763	764	765	766	772	773	776	777	778
	Figure 4D, left		Vehicle-1	Vehicle-2	Vehicle-3	Vehicle-4	Vehicle-5	BQ-1	BQ-2	BQ-3	BQ-4	BQ-5
		Asp	0.729055	1.19768	1.10097	0.647091	1.32521	6.86878	x	6.61878	6.64253	5.69532
		N-Carb-Asp	1.28533	0.57277	0.39478	0.0816418	2.66548	88.9102	x	72.0142	69.997	48.5803
		DHO	0.635852	1.368	1.27818	0.679995	1.03798	3.43392	x	3.96062	2.83694	2.44356
		ear tag #	762	763	764	765	766	772	773	776	777	778
	Figure 4D, right		Vehicle-1	Vehicle-2	Vehicle-3	Vehicle-4	Vehicle-5	BQ-1	BQ-2	BQ-3	BQ-4	BQ-5
		Uracil	0.731402	0.867423	1.01606	0.937134	1.44798	0.0312362	x	0.005989	0.00442947	0.00281489
		rU	0.657348	0.748251	1.03316	0.865107	1.69613	0.0330448	x	0.0120827	0.0140012	0.013452
		UMP	0.734356	1.73016	0.8507	0.764927	0.919857	0.390574	x	0.296425	0.227723	0.257312
		UTP	0.457649	1.32507	0.952038	0.481398	1.78385	0.650823	x	0.228392	0.336766	0.0819226
		Cytosine	1.10111	1.41874	1.02351	0.53793	0.918708	0.752221	x	0.104846	0.0914229	0.0493852
		rC	0.930381	1.08538	0.9848	0.8333	1.16614	0.046155	x	0.0670063	0.0440534	0.104258
		CMP	0.908619	1.54894	0.850594	0.738335	0.953507	0.423751	x	0.318087	0.268799	0.23868
		CTP	0.638651	1.17026	0.677751	0.752723	1.76061	1.39368	x	0.852854	0.767438	0.537824
		dC	0.902392	1.10431	1.26379	0.83898	0.890533	0.282676	x	0.214964	0.173161	0.228164
		dU	0.861396	1.09723	1.34508	0.89933	0.796964	0.278859	x	0.215197	0.206078	0.225807
		UDP-GlcNAc	1.10864	2.16879	0.712378	0.31802	0.692171	0.135075	x	0.103236	0.118866	0.0399047
		Thymidine	0.883644	1.21962	1.28397	0.828112	0.784662	0.587412	x	0.260739	0.197182	0.301553
	Tumor BQ-2 (derived from mouse #773) was exlcuded from the analysis due to attrition during sample processing, resulting in unacceptably low recovery of internal standards and endogenous metabolites

## Sheet: Figure 5C, S5B-C full dataset
	Mouse #762	Mouse #763	Mouse #764	Mouse #765	Mouse #766	Mouse #772	Mouse #776	Mouse #777	Mouse #778					Mouse #762	Mouse #763	Mouse #764	Mouse #765	Mouse #766	Mouse #772	Mouse #776	Mouse #777	Mouse #778				Tumor BQ-2 (derived from mouse #773) was exlcuded from the analysis due to attrition during sample processing, resulting in unacceptably low recovery of internal standards and endogenous metabolites
Metabolite name	Vehicle 1	Vehicle 2	Vehicle 3	Vehicle 4	Vehicle 5	BQ-1	BQ-3	BQ-4	BQ-5		Average vehicle peak area		Metabolite name	Vehicle 1	Vehicle 2	Vehicle 3	Vehicle 4	Vehicle 5	BQ-1	BQ-3	BQ-4	BQ-5
Trimethylamine	1737256	2466700	1959592	1699185	2536128	4072279	3139300	3181226	2096611		2.07977e+06		Trimethylamine	0.835311	1.18604	0.942215	0.817005	1.21943	1.95804	1.50944	1.5296	1.0081
ethanolamine	134088	223817	336218	86898	187229	493456	590171	551685	503413		193650		ethanolamine	0.692424	1.15578	1.73621	0.448737	0.966842	2.54818	3.04762	2.84888	2.5996
Aminoacetone	94792	149542	123909	73103	158730	406367	361975	347860	204238		120015		Aminoacetone	0.789833	1.24603	1.03244	0.609115	1.32258	3.38596	3.01608	2.89847	1.70177
glycine	648050	2894737	1359530	1052736	1123799	3450232	3828911	2576264	1229586		1.41577e+06		glycine	0.457737	2.04464	0.960276	0.743578	0.793772	2.437	2.70447	1.81969	0.868493
Trimethylamine N-oxide	1271912	4343359	2812467	1881909	2969453	1239043	1101563	1420461	1186136		2655820		Trimethylamine N-oxide	0.478915	1.63541	1.05898	0.708598	1.11809	0.466539	0.414773	0.534848	0.446618
alanine	38539468	38987540	34885508	32413012	34175960	34548828	46494288	41889200	36129332		3.58003e+07		alanine	1.07651	1.08903	0.974447	0.905384	0.954628	0.965043	1.29871	1.17008	1.00919
betaine aldehyde	9142060	5624065	8459719	10149362	9178276	3276117	4532213	6052914	7169484		8.5107e+06		betaine aldehyde	1.07418	0.660823	0.99401	1.19254	1.07844	0.384941	0.532531	0.711213	0.842409
choline	572264064	467872096	440014464	288173312	492532064	535717760	544166912	550871296	464179776		452171200		choline	1.26559	1.03472	0.973115	0.63731	1.08926	1.18477	1.20345	1.21828	1.02656
choline M+9	1875643904	1654750720	1771689856	2286400512	1777384704	1841407616	1344339840	1325182336	2307494912		1.87317e+09		choline M+9	1.00132	0.883394	0.945822	1.2206	0.948863	0.983041	0.71768	0.707453	1.23186
dimethylglycine	1054466	1144655	1106043	650977	1039612	1176230	1340780	1414866	1159780		999151		dimethylglycine	1.05536	1.14563	1.10698	0.65153	1.0405	1.17723	1.34192	1.41607	1.16077
4-hydroxybutanoic acid	74973	145979	124642	89391	178861	390709	390267	418585	198650		122769		4-hydroxybutanoic acid	0.610682	1.18905	1.01525	0.728122	1.45689	3.18247	3.17887	3.40953	1.61808
serine	9456474	10939805	9976120	9268740	11754852	9812778	8847827	9546430	6956684		1.02792e+07		serine	0.919962	1.06427	0.970515	0.901699	1.14356	0.954625	0.860751	0.928713	0.676773
cytosine	36062668	46465544	33521182	17617862	30088792	24636148	3433840	2994210	1617424		3.27512e+07		cytosine	1.10111	1.41874	1.02351	0.53793	0.918708	0.752221	0.104846	0.0914229	0.0493852
uracil	195917264	232352528	272166976	251025584	387864128	8367080	1604245	1186501	754011		267865296		uracil	0.731402	0.867423	1.01606	0.937134	1.44798	0.0312361	0.005989	0.00442947	0.00281489
creatinine	85127248	139997296	126970312	63530240	160314384	359028736	31153742	28464180	15318177		115187896		creatinine	0.739029	1.21538	1.10229	0.551536	1.39176	3.1169	0.27046	0.247111	0.132984
1-Pyrroline-5-carboxylate	3092058	2460894	2373104	3014008	2417534	2375319	2006562	1935492	2670171		2.67152e+06		1-Pyrroline-5-carboxylate	1.15742	0.921159	0.888297	1.1282	0.904928	0.889127	0.751094	0.724491	0.999495
proline	1327362304	1370840832	1100224768	1070323904	1188185984	836192448	826517248	644404352	607924096		1.21139e+09		proline	1.09574	1.13163	0.908235	0.883552	0.980847	0.690277	0.68229	0.531956	0.501841
Aspartate semialdehyde/L-2-Amino-3-oxobutanoate	7418450	8938764	6918600	7076748	7481042	8740598	9048281	11611656	8363819		7.56672e+06		Aspartate semialdehyde/L-2-Amino-3-oxobutanoate	0.980405	1.18133	0.914346	0.935246	0.988677	1.15514	1.1958	1.53457	1.10534
betaine	2053417344	2271270144	1887158144	1903746048	1957162624	2399243776	2511150336	3230584320	2242490112		2.01455e+09		betaine	1.01929	1.12743	0.936764	0.944998	0.971513	1.19096	1.24651	1.60363	1.11315
valine	13423269	16644614	18060172	12645220	15207661	16347008	15247930	16632275	13770673		1.51962e+07		valine	0.883331	1.09532	1.18847	0.832131	1.00076	1.07573	1.0034	1.0945	0.906193
indole	69129352	83267000	66858968	53509820	74965816	79758680	86956224	75497496	43927560		6.95462e+07		indole	0.994006	1.19729	0.961361	0.769414	1.07793	1.14684	1.25034	1.08557	0.631631
homoserine	8256927	7371328	7225178	6634346	7817429	6500692	8674080	10682300	10327903		7.46104e+06		homoserine	1.10667	0.987976	0.968387	0.889198	1.04777	0.871285	1.16258	1.43174	1.38424
threonine	18594498	17394126	18366892	16268265	18795710	13144264	21643488	27570484	27592236		1.78839e+07		threonine	1.03973	0.972614	1.02701	0.90966	1.05099	0.734978	1.21022	1.54164	1.54285
threonine	1286286	1243006	1248763	1213413	846950	917533	939479	1286646	1436789		1.16768e+06		threonine	1.10157	1.06451	1.06944	1.03916	0.725325	0.785772	0.804566	1.10188	1.23046
cysteine	229376	356071	219962	208907	268981	437596	420551	399654	277602		256659		cysteine	0.893698	1.38733	0.857019	0.813946	1.04801	1.70497	1.63856	1.55714	1.0816
nicotinamide	571408448	1036803392	404797504	326387712	785253440	654843840	644505728	443127584	280450752		6.2493e+08		nicotinamide	0.914356	1.65907	0.647748	0.522279	1.25655	1.04787	1.03132	0.709083	0.448771
nicotinate	12807272	20472346	8813317	9834270	19557738	24208694	26525494	19921866	10320816		1.4297e+07		nicotinate	0.895802	1.43193	0.616446	0.687856	1.36796	1.69327	1.85532	1.39343	0.721887
Taurine	3788068608	3969679360	3779547136	3770830848	3705008384	3941707008	4902291456	4111370496	4777987072		3.80263e+09		Taurine	0.996172	1.04393	0.993931	0.991638	0.974329	1.03657	1.28919	1.08119	1.2565
Pyrroline hydroxycarboxylic acid	315581216	324205568	327108320	254593760	357523008	281047712	171084832	197309024	192111984		3.15802e+08		Pyrroline hydroxycarboxylic acid	0.9993	1.02661	1.0358	0.806181	1.13211	0.889948	0.541747	0.624786	0.60833
leucine	21232376	29539524	30408104	17900234	24054554	32563024	26123974	24292068	20703340		2.4627e+07		leucine	0.86216	1.19948	1.23475	0.726855	0.976757	1.32225	1.06079	0.986401	0.840678
Isoleucine	19827084	24305748	22879028	12529085	19010780	25409724	19585662	17261296	10751835		19710345		Isoleucine	1.00592	1.23315	1.16076	0.63566	0.964508	1.28916	0.993674	0.875748	0.545492
hydroxyproline	10099989	10031786	7900745	7729192	6703390	7006100	12079920	10189130	9148574		8.49302e+06		hydroxyproline	1.18921	1.18118	0.930263	0.910064	0.789282	0.824924	1.42233	1.19971	1.07719
creatine	954532864	901834560	792890048	740398784	687449088	631446848	999391744	915206144	830596800		8.15421e+08		creatine	1.1706	1.10597	0.972369	0.907996	0.84306	0.774381	1.22561	1.12237	1.01861
methylsuccinic acid	7727564	7094976	5412303	6029636	5221526	5028753	8475700	7863784	6833276		6297201		methylsuccinic acid	1.22714	1.12669	0.859478	0.95751	0.829182	0.79857	1.34595	1.24877	1.08513
asparagine	36414092	37604348	33180086	27776040	35642316	27582024	22123860	22548746	22173884		3.41234e+07		asparagine	1.06713	1.10201	0.972356	0.813989	1.04451	0.808303	0.648349	0.660801	0.649815
aspartate	186329984	306099072	281383040	165381680	338692736	1755503488	1691611136	1697679488	1455593856		2.55577e+08		aspartate	0.729055	1.19768	1.10097	0.647091	1.32521	6.86878	6.61878	6.64253	5.69532
homocysteine	839468	1323456	1361100	552000	1355363	8150923	7121318	7399347	4820387		1.08628e+06		homocysteine	0.772793	1.21834	1.25299	0.508157	1.24771	7.50354	6.55571	6.81166	4.43753
methylcysteine	339415808	372851968	254616448	216524960	259253536	431023840	427445152	475983232	249739232		288532544		methylcysteine	1.17635	1.29224	0.882453	0.750435	0.898524	1.49385	1.48145	1.64967	0.86555
adenine	142544496	125265024	111530008	106039440	141063472	164534624	145752112	130235264	130575896		125288488		adenine	1.13773	0.999813	0.890186	0.846362	1.12591	1.31325	1.16333	1.03948	1.0422
methylnicotinamide	199798960	311729344	258870464	207534736	176332224	721238144	605302976	582765760	568719296		2.30853e+08		methylnicotinamide	0.865481	1.35034	1.12136	0.89899	0.763829	3.12423	2.62203	2.5244	2.46355
hypoxanthine	2233496064	2260273920	1501223680	1190209664	2053048064	2547047168	1831793024	1641275520	1327566208		1.84765e+09		hypoxanthine	1.20883	1.22332	0.812504	0.644175	1.11117	1.37853	0.991418	0.888304	0.718516
anthranilate	406667680	516928320	577438976	339646848	486917216	667373568	348221696	338902656	272770240		465519808		anthranilate	0.873578	1.11043	1.24042	0.729608	1.04596	1.43361	0.748028	0.728009	0.585948
acetylcholine	291190816	343917056	380247136	335442080	391341408	57548388	258234800	180049264	182534944		3.48428e+08		acetylcholine	0.835728	0.987054	1.09132	0.962731	1.12316	0.165166	0.741143	0.516748	0.523882
lysine	131535104	311463712	135821744	89212952	174829392	326909376	227931184	170092336	157604032		1.68573e+08		lysine	0.780288	1.84765	0.805717	0.529226	1.03712	1.93928	1.35212	1.00902	0.934933
glutamine	325895264	268731616	304511552	261440064	330516992	145245280	119051320	163732480	197100928		2.98219e+08		glutamine	1.0928	0.901121	1.0211	0.876671	1.1083	0.487042	0.399208	0.549034	0.660927
glutamate	911990144	1014799360	960634752	883593664	1082400512	1003467008	733806464	549867008	533828960		9.70684e+08		glutamate	0.939534	1.04545	0.989648	0.91028	1.11509	1.03377	0.755969	0.566474	0.549952
N-acetylserine	10301823	12781472	10336427	11501365	11380133	4217312	6164053	4931968	5216416		11260244		N-acetylserine	0.914885	1.1351	0.917958	1.02141	1.01065	0.374531	0.547417	0.437998	0.46326
methionine	158908736	172725200	144362000	102825440	148155632	227685120	199667728	194515248	142322528		1.45395e+08		methionine	1.09294	1.18797	0.992892	0.707212	1.01898	1.56597	1.37327	1.33784	0.978865
guanine	15465894	13920301	11117666	11009443	11874934	12656139	6324647	4292688	5134943		1.26776e+07		guanine	1.21993	1.09802	0.87695	0.868414	0.936683	0.998303	0.498882	0.338603	0.405039
3-Hydroxyanthranilic acid	1791863	3073056	3081505	2796745	2859211	7734743	3366858	2496791	2725827		2720476		3-Hydroxyanthranilic acid	0.658658	1.1296	1.13271	1.02804	1.051	2.84316	1.2376	0.917777	1.00197
dopamine	884046	1965872	888487	1026411	2447384	3867492	2920686	1973125	2069676		1442440		dopamine	0.612882	1.36288	0.615961	0.71158	1.6967	2.68122	2.02482	1.36791	1.43484
histidine	4138332928	6070545408	4836134400	4134109952	6506798592	8953032704	8158985728	8390147072	6686763008		5137184256		histidine	0.805564	1.18169	0.941398	0.804742	1.26661	1.74279	1.58822	1.63322	1.30164
2-Isopropylmaleate	1749731	1590467	1114271	1289949	1121518	2458192	2401512	3725450	2252484		1.37319e+06		2-Isopropylmaleate	1.27421	1.15823	0.811449	0.939383	0.816726	1.79014	1.74886	2.71299	1.64033
Aminopropylcadaverine	2559908	3660053	2750543	1501086	2204339	2301248	3638909	1990496	2347639		2.53519e+06		Aminopropylcadaverine	1.00975	1.4437	1.08495	0.592101	0.869498	0.907724	1.43536	0.785148	0.926022
amino octanoic acid	2798578944	2996949248	3126761728	2949599744	2961485824	2719731200	2885996288	3036969728	2726413056		2.96668e+09		amino octanoic acid	0.943339	1.0102	1.05396	0.994244	0.998251	0.916761	0.972805	1.02369	0.919013
carnitine	770863360	512483616	750187392	838795008	917622848	240429456	345227488	493992576	568797824		7.5799e+08		carnitine	1.01698	0.676108	0.989706	1.1066	1.2106	0.317193	0.455451	0.651713	0.750402
aminoadipic acid	12028504	20234248	18404170	12755835	16795990	25558224	19758894	28839174	11413393		1.60437e+07		aminoadipic acid	0.749731	1.26119	1.14712	0.795066	1.04689	1.59303	1.23156	1.79753	0.711392
phenylalanine	1118283776	1317549952	1126252032	870209600	1187611904	1372638080	1382252288	1221822848	923876416		1.12398e+09		phenylalanine	0.994931	1.17222	1.00202	0.774221	1.05661	1.22123	1.22978	1.08705	0.821968
arginine	3909490432	8097369088	3509346304	3393600256	5229399552	5920785920	5781085184	5116575744	4787753472		4.82784e+09		arginine	0.80978	1.67722	0.726898	0.702923	1.08318	1.22638	1.19745	1.05981	0.991697
N-Acetyl-L-Ornithine	44535084	92541880	39468460	42273936	60628560	63472704	63471884	54590316	52913788		55889584		N-Acetyl-L-Ornithine	0.79684	1.6558	0.706186	0.756383	1.08479	1.13568	1.13567	0.976753	0.946756
citrulline	566611264	575259840	472949792	486018432	533394112	150106944	238999488	222553136	182972176		526846688		citrulline	1.07548	1.09189	0.897699	0.922504	1.01243	0.284916	0.453641	0.422425	0.347297
Serotonin	1630092	3855735	3188643	1779433	2373440	1465070	3212759	1299683	4547452		2.56547e+06		Serotonin	0.635397	1.50294	1.24291	0.693609	0.925149	0.571073	1.25231	0.506606	1.77256
tyrosine	304706560	327312576	236305136	190594352	246707344	338031840	342599968	393585440	214601664		2.61125e+08		tyrosine	1.1669	1.25347	0.90495	0.729896	0.944786	1.29452	1.31201	1.50727	0.821834
Kynurenic acid	1264159	1204717	1390348	1171262	1016769	8257570	426367	731750	958649		1209451		Kynurenic acid	1.04523	0.996086	1.14957	0.968425	0.840686	6.82754	0.352529	0.605027	0.792632
metanephrine	34416484	26847370	22339624	21413580	39997312	4238636	2002983	2175937	2027412		29002874		metanephrine	1.18666	0.92568	0.770256	0.738326	1.37908	0.146145	0.0690615	0.0750249	0.0699038
Acylcarnitine C2	5698968576	6074254336	5656059392	5638625792	5854276608	7515937792	7804009984	7971343872	6910145024		5.78444e+09		Acylcarnitine C2	0.985224	1.0501	0.977806	0.974793	1.01207	1.29934	1.34914	1.37807	1.19461
Acylcarnitine C3	3926536704	4464145408	4268197376	3720524032	4422974464	3659718912	3620265728	2813269504	2989878272		4.16048e+09		Acylcarnitine C3	0.943771	1.07299	1.02589	0.894255	1.06309	0.87964	0.870157	0.676189	0.718639
Acylcarnitine C4	7454200320	8029748736	7910025728	7628823552	7545807872	7891131392	8157743616	7297700352	7441136128		7.71372e+09		Acylcarnitine C4	0.966356	1.04097	1.02545	0.988994	0.978232	1.023	1.05756	0.946067	0.964662
Acylcarnitine C5	4859459584	5616869376	5515063296	4430609920	2839292928	5018516480	5857242112	3440571136	4706977792		4.65226e+09		Acylcarnitine C5	1.04454	1.20734	1.18546	0.952357	0.610304	1.07873	1.25901	0.739548	1.01176
Acylcarnitine C6	3375637504	4203104512	3795891456	3571270912	3610255104	3493959680	3514509312	3189436416	2732759552		3.71123e+09		Acylcarnitine C6	0.909573	1.13254	1.02281	0.962287	0.972792	0.941455	0.946993	0.859401	0.736348
Acylcarnitine C5:1	85517944	110804624	88836768	112415224	60191108	83751104	85928064	49194612	59820264		9.15531e+07		Acylcarnitine C5:1	0.93408	1.21028	0.97033	1.22787	0.657445	0.914781	0.93856	0.537334	0.653394
Acylcarnitine C4-OH	2883660032	3072318720	2771732480	2741254144	2915576064	2739798272	2534435584	2659215360	2203953408		2876908288		Acylcarnitine C4-OH	1.00235	1.06792	0.963441	0.952847	1.01344	0.952341	0.880958	0.924331	0.766084
Acylcarnitine C5-OH	320860096	455856224	441675232	441735072	461214912	312456320	288828160	245712096	236837904		4.24268e+08		Acylcarnitine C5-OH	0.756267	1.07445	1.04103	1.04117	1.08708	0.736459	0.680768	0.579143	0.558227
Acylcarnitine C4-DC	321007840	456644096	442268672	442377216	462009504	312830752	289117664	245929984	237015456		4.24861e+08		Acylcarnitine C4-DC	0.755559	1.07481	1.04097	1.04123	1.08744	0.736312	0.680499	0.578847	0.557865
Acylcarnitine C5-DC	259982656	392708480	341008608	281418048	324588640	84570440	107037064	53341208	60268292		3.19941e+08		Acylcarnitine C5-DC	0.812595	1.22744	1.06585	0.879593	1.01453	0.264331	0.334552	0.166722	0.188373
tryptophan	463368288	515319488	428905568	348333760	541597440	425336768	500544320	435566688	264829856		4.59505e+08		tryptophan	1.00841	1.12147	0.933408	0.758063	1.17865	0.925641	1.08931	0.947904	0.576337
lipoamide	24857370	27778026	20728166	16857930	27568224	21264622	23504000	20573044	13015757		2.35579e+07		lipoamide	1.05516	1.17914	0.87988	0.715594	1.17023	0.902652	0.99771	0.873295	0.5525
Kynurenine	3164054	5817673	4027571	2709062	5221706	3636756	6290763	4678930	4333931		4.18801e+06		Kynurenine	0.755502	1.38912	0.96169	0.646861	1.24682	0.868373	1.50209	1.11722	1.03484
O-Succinyl-L-homoserine	266430	790494	377406	211935	237062	2486904	3367434	1856431	2880419		376665		O-Succinyl-L-homoserine	0.707339	2.09866	1.00197	0.562661	0.62937	6.60242	8.94012	4.92859	7.64716
n-acetyl glucosamine	3751150	4610741	4245492	3341298	4568069	3175577	2817060	1644746	1905756		4103350		n-acetyl glucosamine	0.914168	1.12365	1.03464	0.814285	1.11325	0.773899	0.686527	0.40083	0.464439
3-hydroxykynurenine	2705820	3380200	3073772	2452610	3439185	2225084	1970577	1140555	1307963		3.01032e+06		3-hydroxykynurenine	0.898849	1.12287	1.02108	0.814735	1.14247	0.739153	0.654608	0.378882	0.434493
L-Glutamyl-5-phosphate	2436324	2924531	2605491	2769508	3206931	4299124	4406718	4287759	3328424		2788557		L-Glutamyl-5-phosphate	0.873686	1.04876	0.934351	0.993169	1.15003	1.5417	1.58029	1.53763	1.1936
deoxycytidine	30503544	37328924	42719808	28360044	30102698	9555307	7266414	5853358	7712622		3.3803e+07		deoxycytidine	0.902392	1.10431	1.26379	0.83898	0.890533	0.282676	0.214964	0.173161	0.228164
deoxyuridine	1556745	1982960	2430869	1625300	1440301	503963	388912	372432	408086		1807235		deoxyuridine	0.861396	1.09723	1.34508	0.89933	0.796964	0.278859	0.215197	0.206078	0.225807
N2-Succinyl-L-ornithine	3401328	5092933	4029492	2787824	3110385	12380502	11072665	12064908	6389390		3.68439e+06		N2-Succinyl-L-ornithine	0.923172	1.3823	1.09367	0.756658	0.844206	3.36026	3.00529	3.2746	1.73418
melatonin	66971764	88396296	85689616	73814400	76241392	88153944	95074952	75827464	66663760		7.82227e+07		melatonin	0.856168	1.13006	1.09546	0.943644	0.974671	1.12696	1.21544	0.969379	0.85223
5-methoxytryptophan	13841630	19170770	18205176	15455575	17003668	19000826	20673140	16946162	14586722		1.67354e+07		5-methoxytryptophan	0.827089	1.14552	1.08783	0.923528	1.01603	1.13537	1.2353	1.0126	0.871611
thymidine	464445	641032	674855	435257	412420	308745	137045	103639	158497		525602		thymidine	0.883644	1.21962	1.28397	0.828112	0.784662	0.587412	0.260739	0.197182	0.301553
cytidine	672090304	784057792	711401664	601961152	842399872	33341574	48404156	31823376	75314384		7.22382e+08		cytidine	0.930381	1.08538	0.9848	0.8333	1.16614	0.046155	0.0670063	0.0440534	0.104258
uridine	70545024	80300512	110876800	92841232	182024592	3546289	1296687	1502581	1443639		107317632		uridine	0.657348	0.748251	1.03316	0.865107	1.69613	0.0330448	0.0120827	0.0140013	0.013452
uridine	4535	76108	19029	30786	47263	337000	367779	141640	76664		35544.2		uridine	0.127588	2.14122	0.535362	0.866133	1.3297	9.48115	10.3471	3.9849	2.15686
N2-Succinyl-L-glutamate	15531649	18135420	16182732	12917830	18138512	33866288	18966258	15940065	12443272		1.61812e+07		N2-Succinyl-L-glutamate	0.959856	1.12077	1.00009	0.798322	1.12096	2.09294	1.17211	0.985096	0.768994
pyridoxamine phosphate	1408850	4231909	2098171	2321624	4641061	3239892	2932098	2029571	2138950		2940323		pyridoxamine phosphate	0.479148	1.43927	0.713585	0.789581	1.57842	1.10188	0.997203	0.690254	0.727454
deoxyadenosine	13088171	4656715	22976780	12756151	10005144	981391	674317	619748	1960580		1.26966e+07		deoxyadenosine	1.03084	0.366769	1.80968	1.00469	0.788018	0.0772956	0.0531101	0.0488122	0.154418
deoxyinosine	20918668	43347756	34135948	15762918	31319556	17360486	15788990	11457707	13195305		2.9097e+07		deoxyinosine	0.718929	1.48977	1.17318	0.541737	1.07639	0.596642	0.542633	0.393777	0.453494
Glycerophosphocholine	2094089600	2392423168	2548107520	2033905408	2167757824	4853950464	5317630976	5815104512	4907202048		2247256704		Glycerophosphocholine	0.931843	1.0646	1.13387	0.905061	0.964624	2.15994	2.36628	2.58765	2.18364
sn-Glycero-3-Phosphocholine	33100006	37237144	45247636	34495540	46413012	74482520	130127920	119919720	124795936		3.92987e+07		sn-Glycero-3-Phosphocholine	0.842268	0.947542	1.15138	0.877779	1.18103	1.89529	3.31126	3.0515	3.17558
D-glucosamine-P	1042494	905647	1449846	980163	1226400	1468184	3441353	3440620	3209125		1120910		D-glucosamine-P	0.930043	0.807957	1.29345	0.874435	1.09411	1.30981	3.07014	3.06949	2.86296
D-glucosamine-1-phosphate	407051	500323	870492	342859	678946	904063	2029160	1949222	2176508		559934		D-glucosamine-1-phosphate	0.726962	0.893539	1.55463	0.61232	1.21255	1.61459	3.62393	3.48116	3.88708
thiamine	45739756	42704600	50345312	39570144	22407742	42249772	58693048	64663232	91263320		4.01535e+07		thiamine	1.13912	1.06353	1.25382	0.985472	0.558052	1.05221	1.46172	1.6104	2.27286
S-ribosyl-L-homocysteine	680955	931718	511489	600049	1902182	2399371	2070562	1756588	1569927		925279		S-ribosyl-L-homocysteine	0.735946	1.00696	0.552795	0.648506	2.05579	2.59313	2.23777	1.89844	1.69671
adenosine	2127781504	2038669056	2473111808	1897280000	2481171200	1221887744	213518544	116579128	494112448		2.2036e+09		adenosine	0.965592	0.925153	1.1223	0.86099	1.12596	0.554495	0.0968952	0.0529039	0.224229
inosine	106586832	222881232	78205352	46188732	102749168	209891184	160291824	153414080	137608464		1.11322e+08		inosine	0.957462	2.00213	0.702513	0.41491	0.922988	1.88544	1.43989	1.37811	1.23613
gamma amino butyrate	350508	863298	784469	449564	670308	959688	1142284	700914	471680		623629		gamma amino butyrate	0.562045	1.38431	1.25791	0.720883	1.07485	1.53888	1.83167	1.12393	0.756347
1-Methyladenosine	462317248	622810752	592666112	418597824	317594560	337965952	278403360	171815984	266905888		4.82797e+08		1-Methyladenosine	0.95758	1.29	1.22757	0.867026	0.657822	0.700016	0.576646	0.355876	0.552832
guanosine	93194096	147170432	70826168	45131664	69786000	103041984	61049512	50167484	59289944		85221672		guanosine	1.09355	1.72691	0.831082	0.52958	0.818876	1.20911	0.716361	0.58867	0.695714
N-Succinyl-L,L-2,6-diaminopimelate	13206094	18585444	12388148	10257715	28451238	56895940	49071196	53744544	29394948		1.65777e+07		N-Succinyl-L,L-2,6-diaminopimelate	0.796617	1.12111	0.747277	0.618765	1.71623	3.43207	2.96007	3.24197	1.77316
N-Succinyl-L,L-2,6-diaminopimelate	285066	820134	405111	171324	342508	2865677	2158518	2459693	1187254		404829		N-Succinyl-L,L-2,6-diaminopimelate	0.704165	2.02588	1.0007	0.423201	0.846057	7.07874	5.33193	6.07589	2.93273
Argininosuccinic acid	290435328	515023712	268672032	264001072	435632128	324510144	325917184	271208160	285042048		3.54753e+08		Argininosuccinic acid	0.818698	1.45178	0.75735	0.744183	1.22799	0.91475	0.918716	0.764499	0.803495
S-methyl-5-thioadenosine	202059072	259911776	141422592	161963632	305859904	693033536	658406464	574423552	515465184		2.14243e+08		S-methyl-5-thioadenosine	0.943129	1.21316	0.660102	0.75598	1.42763	3.2348	3.07317	2.68117	2.40598
7-methylguanosine	55719788	50931420	40682128	37981212	41329512	67324160	28839276	20522654	26154162		45328812		7-methylguanosine	1.22924	1.1236	0.897489	0.837904	0.911771	1.48524	0.636224	0.452751	0.576988
dCMP	5285062	3802004	5095256	4550907	5499472	4676048	3505496	2935165	3643682		4.84654e+06		dCMP	1.09048	0.784478	1.05132	0.939001	1.13472	0.964822	0.723299	0.605621	0.751811
GSH	1536019456	2571553792	1754370944	1044384640	1335047936	3970120192	4520092160	4540175872	3712442624		1.64828e+09		GSH	0.931895	1.56015	1.06437	0.633623	0.809967	2.40865	2.74232	2.7545	2.25232
N-Acetylneuraminic acid	14832223	29345498	25253412	15420021	16162794	22425204	16985818	15956903	16948902		2.02028e+07		N-Acetylneuraminic acid	0.734167	1.45255	1.25	0.763262	0.800028	1.11001	0.840766	0.789837	0.838939
CMP	311315808	530707680	291434912	252972208	326695744	145187808	108984760	92097224	81777928		3.42625e+08		CMP	0.908619	1.54894	0.850594	0.738335	0.953507	0.423751	0.318087	0.268799	0.23868
UMP	479009792	1128558848	554899840	498950784	600009728	254765600	193353840	148540192	167841184		6.52286e+08		UMP	0.734356	1.73016	0.8507	0.764927	0.919857	0.390574	0.296425	0.227723	0.257312
cAMP	26726518	58462972	57459856	29447660	42804976	141646576	310503648	131668344	167172336		4.29804e+07		cAMP	0.62183	1.36022	1.33689	0.685142	0.995919	3.29561	7.22431	3.06345	3.8895
dAMP	409181888	540144640	271928096	219745328	307959200	530616064	516873568	471754432	361857056		3.49792e+08		dAMP	1.16979	1.54419	0.7774	0.628217	0.880407	1.51695	1.47766	1.34867	1.03449
cGMP	532333	888430	629293	525384	978094	2162819	1171271	1123568	777430		710707		cGMP	0.749019	1.25007	0.885447	0.739242	1.37623	3.04319	1.64804	1.58092	1.09388
dGMP	5546304	9525378	6190682	4882258	6661880	18251066	14024871	13477713	13059085		6.5613e+06		dGMP	0.845306	1.45175	0.943514	0.744099	1.01533	2.78162	2.13751	2.05412	1.99032
IMP	3796811520	5277357056	3807169280	3006829568	4983622144	7792596480	8059679232	6804907520	6743346176		4.17436e+09		IMP	0.909556	1.26423	0.912037	0.720309	1.19387	1.86678	1.93076	1.63017	1.61542
N-(5-Phospho-D-ribosyl)anthranilate	8363045	13266402	8408967	6459617	10530550	20351652	15844438	18551762	16809964		9.40572e+06		N-(5-Phospho-D-ribosyl)anthranilate	0.889145	1.41046	0.894027	0.686776	1.11959	2.16375	1.68455	1.97239	1.78721
S-adenosyl-L-methioninamine	4213998	6734208	4025562	3208287	5204178	15646778	12151538	9243976	8661812		4.67725e+06		S-adenosyl-L-methioninamine	0.900957	1.43978	0.860669	0.685935	1.11266	3.3453	2.59801	1.97637	1.8519
GMP	1732157312	3153435648	1359360896	1122368896	2570540288	3607244544	3601775104	3080541696	2950692864		1987572608		GMP	0.871494	1.58658	0.68393	0.564693	1.29331	1.8149	1.81215	1.5499	1.48457
XMP	9199260	10495466	3660936	2926593	9041007	12266809	8589045	7007986	5650393		7.06465e+06		XMP	1.30215	1.48563	0.518205	0.414259	1.27975	1.73636	1.21578	0.991979	0.799812
riboflavin	13860023	11814959	8745973	6751916	7598791	9124040	5864483	6513207	6774995		9.75433e+06		riboflavin	1.42091	1.21125	0.896624	0.692197	0.779017	0.935383	0.601218	0.667725	0.694563
S-adenosyl-L-homocysteine	123112584	119927208	72348624	78950832	107747288	192663504	317834976	254671616	279697536		1.00417e+08		S-adenosyl-L-homocysteine	1.22601	1.19429	0.72048	0.786227	1.073	1.91863	3.16514	2.53613	2.78535
ADP	2028471424	4461520384	2329276160	1656856704	3783896576	5569849856	5917010432	5434600448	3105535488		2.852e+09		ADP	0.711244	1.56435	0.816716	0.580945	1.32675	1.95296	2.07468	1.90554	1.0889
folate	803431	1775987	902525	522170	1451732	3085459	3050556	2484368	2104081		1091169		folate	0.736303	1.6276	0.827118	0.478542	1.33044	2.82766	2.79568	2.27679	1.92828
GDP	67193560	192950336	76761568	53807568	148289024	645644992	381672000	438509280	201429760		1.078e+08		GDP	0.623315	1.78988	0.712071	0.499141	1.37559	5.98926	3.54054	4.06779	1.86854
dihydrofolate	560894	1392534	603200	294503	1141773	2546154	2499961	2093968	1761946		798581		dihydrofolate	0.702363	1.74376	0.75534	0.368783	1.42975	3.18835	3.1305	2.62211	2.20635
CTP	4575634	8384384	4855769	5392907	12613980	9985055	6110299	5498334	3853262		7.16453e+06		CTP	0.638651	1.17026	0.677751	0.752723	1.76061	1.39368	0.852854	0.767438	0.537824
UTP	3658441	10592568	7610581	3848293	14260049	5202668	1825760	2692103	654888		7.99399e+06		UTP	0.457649	1.32507	0.952038	0.481398	1.78385	0.650823	0.228392	0.336766	0.0819226
UTP	95	9768	17971	7707	247269	13279	1555	1652	618		56562		UTP	0.00167957	0.172695	0.317722	0.136258	4.37165	0.234769	0.027492	0.0292069	0.0109261
ATP	195470160	377646432	225228656	151691728	471345600	771335936	458573760	583731520	124901024		2.84277e+08		ATP	0.687606	1.32845	0.792287	0.533606	1.65805	2.71333	1.61313	2.05339	0.439365
ADP-D-ribose	38323460	74272120	75087384	52975220	30506972	118548088	79125176	93857088	71911200		5.4233e+07		ADP-D-ribose	0.706644	1.3695	1.38453	0.976807	0.562516	2.1859	1.45898	1.73063	1.32597
Phosphoribosyl-AMP	37341204	68607360	66074344	44904248	29604366	110041944	73745168	80356768	66287560		4.93063e+07		Phosphoribosyl-AMP	0.757331	1.39145	1.34008	0.91072	0.600417	2.2318	1.49565	1.62975	1.3444
Phosphoribosyl-formimino-AICAR-phosphate	159780	631239	174589	54005	511142	1458273	1415256	1093460	841269		306151		Phosphoribosyl-formimino-AICAR-phosphate	0.521899	2.06186	0.570271	0.1764	1.66957	4.76325	4.62274	3.57164	2.74789
GSSG	1508686208	2274338560	1462019968	1438162688	2788682240	2608939008	1732259328	1681007872	1267392384		1.89438e+09		GSSG	0.796402	1.20057	0.771768	0.759174	1.47208	1.3772	0.914421	0.887367	0.669028
NAD	626565312	1092624512	731655168	541685376	702250112	1393537536	1368309120	1120106368	799045824		738956096		NAD	0.847906	1.47861	0.99012	0.733041	0.950327	1.88582	1.85168	1.5158	1.08132
NADH	2317572	2010343	992830	518797	3238147	12843656	10664176	8540088	7375632		1.81554e+06		NADH	1.27652	1.1073	0.546852	0.285754	1.78357	7.0743	5.87384	4.70389	4.06251
NADP	15184570	52234896	24754144	13729346	25224382	121497640	57851688	80016928	49022404		2.62255e+07		NADP	0.579001	1.99176	0.943897	0.523512	0.961828	4.63281	2.20594	3.05112	1.86927
NADPH	2729430	944191	1149767	943286	3074185	9600136	7548516	5171291	2337429		1.76817e+06		NADPH	1.54365	0.533993	0.650258	0.533481	1.73862	5.42941	4.26911	2.92465	1.32195
coenzyme A	6464045	26959006	5174469	2619880	5841998	82103568	115268568	104182240	39451232		9.41188e+06		coenzyme A	0.686796	2.86436	0.549781	0.278359	0.620705	8.7234	12.2471	11.0692	4.19164
flavin adenine dinucleotide	250810	1129351	218698	123626	266302	792592	788831	802456	638371		397757		flavin adenine dinucleotide	0.63056	2.8393	0.549828	0.310808	0.669509	1.99265	1.9832	2.01745	1.60493
flavin adenine dinucleotide reduced	52772	246290	61313	24748	165125	783351	706718	508587	339916		110050		flavin adenine dinucleotide reduced	0.479529	2.23799	0.55714	0.22488	1.50046	7.11816	6.42181	4.62143	3.08875
acetyl-CoA	3127088	1731673	2743670	1429044	2978999	9791088	8372473	10009929	3791856		2.40209e+06		acetyl-CoA	1.30182	0.720901	1.1422	0.594916	1.24017	4.07606	3.48549	4.16717	1.57856
Acetoacetyl-CoA	102075	254076	131802	34934	37508	165161	647810	349821	148890		112079		Acetoacetyl-CoA	0.910742	2.26694	1.17597	0.311691	0.334657	1.47361	5.77994	3.1212	1.32844
succinyl conenzyme A	305177	196272	124005	54994	153472	185436	184622	26336	226181		166784		succinyl conenzyme A	1.82977	1.1768	0.743507	0.329732	0.920184	1.11183	1.10695	0.157905	1.35613
pyruvate	41455	30239	44205	62717	66495	13814	49289	23653	12963		49022.2		pyruvate	0.845637	0.616843	0.901734	1.27936	1.35643	0.281791	1.00544	0.482496	0.264431
lactate	227805	552163	506839	277254	411669	560060	665823	407030	200356		395146		lactate	0.576508	1.39736	1.28266	0.70165	1.04181	1.41735	1.68501	1.03007	0.507043
3-hydroxy butyric acid	198616	497898	454527	248646	376626	506730	614479	392020	209135		355263		3-hydroxy butyric acid	0.559068	1.40149	1.27941	0.699894	1.06013	1.42635	1.72965	1.10347	0.588677
glycerate	400774	593624	515540	443543	656152	1213549	1163791	1165142	722634		521927		glycerate	0.767874	1.13737	0.987763	0.849819	1.25717	2.32513	2.2298	2.23239	1.38455
fumarate	183489	255177	114373	26581	227471	995804	831016	552750	509250		161418		fumarate	1.13673	1.58084	0.708551	0.164672	1.4092	6.16909	5.14822	3.42434	3.15485
N-acetylglycine	381066	574094	497320	376857	569775	1122508	1089461	1106781	707616		479822		N-acetylglycine	0.794181	1.19647	1.03647	0.785409	1.18747	2.33942	2.27055	2.30665	1.47475
guanidinoacetate¬†	202115	491585	449802	238267	345517	481858	596185	363527	198197		345457		guanidinoacetate¬†	0.585065	1.423	1.30205	0.689715	1.00017	1.39484	1.72579	1.05231	0.573724
3-hydroxy isovaleric acid	47975	218569	54988	20947	152393	672330	627213	424544	318938		98974.4		3-hydroxy isovaleric acid	0.484721	2.20834	0.555578	0.211641	1.53972	6.79297	6.33712	4.28943	3.22243
Pyroglutamic acid	177845	455708	422056	246136	359440	484104	558002	350584	182174		332237		Pyroglutamic acid	0.535296	1.37164	1.27035	0.740845	1.08188	1.4571	1.67953	1.05522	0.548325
N-Acetyl-L-alanine	165537	451844	411323	213852	329866	458863	536893	299732	174901		314484		N-Acetyl-L-alanine	0.526376	1.43678	1.30793	0.680008	1.04891	1.4591	1.70722	0.95309	0.556152
oxaloacetate	25041	158106	44141	8318	106501	569049	487158	320595	230823		68421.4		oxaloacetate	0.365982	2.31077	0.645134	0.12157	1.55655	8.31683	7.11997	4.6856	3.37355
malate	2887041	3286166	2373419	1597551	2414166	622784	530417	342826	266289		2.51167e+06		malate	1.14945	1.30836	0.944957	0.636052	0.96118	0.247956	0.211181	0.136493	0.106021
acetylphosphate	23364	147677	39618	7924	93662	498503	453054	280165	208531		62449		acetylphosphate	0.374129	2.36476	0.634406	0.126888	1.49982	7.98256	7.25478	4.4863	3.33922
2-ketoglutarate	310019	519662	416040	337894	553505	1022736	976335	981962	629135		427424		2-ketoglutarate	0.72532	1.2158	0.973366	0.790536	1.29498	2.39279	2.28423	2.2974	1.47192
Phenylpropiolic acid	305118	521174	412016	328575	531618	1034371	948132	967305	614408		419700		Phenylpropiolic acid	0.72699	1.24178	0.981691	0.78288	1.26666	2.46455	2.25907	2.30475	1.46392
2-hydroxyglutarate	24967	143480	32840	21770	89140	463971	413013	264476	221181		62439.4		2-hydroxyglutarate	0.39986	2.29791	0.52595	0.348658	1.42762	7.43074	6.61462	4.23572	3.54233
MVA	165136	403606	381943	207667	302230	419277	497584	295892	167034		292116		MVA	0.565309	1.38166	1.3075	0.710905	1.03462	1.43531	1.70338	1.01292	0.571806
xanthine	416315	343908	150832	83226	90870	273063	137586	94574	130918		217030		xanthine	1.91824	1.58461	0.694982	0.383477	0.418697	1.25818	0.633949	0.435764	0.603225
dihydroorotate	177894	382728	357600	190244	290398	960718	1108073	793700	683641		279773		dihydroorotate	0.635852	1.368	1.27818	0.679995	1.03798	3.43392	3.96062	2.83694	2.44356
Indole-3-carboxylic acid	151580	372864	345850	171668	264482	374015	456850	277307	146512		261289		Indole-3-carboxylic acid	0.580124	1.42702	1.32363	0.657005	1.01222	1.43142	1.74845	1.0613	0.560728
phenylpyruvate	150727	372732	330115	179470	264211	375019	458501	266814	146992		259451		phenylpyruvate	0.580946	1.43662	1.27236	0.69173	1.01835	1.44543	1.7672	1.02838	0.56655
Phenyllactic acid	141073	358912	330914	182397	267170	362477	422139	250165	140900		256093		Phenyllactic acid	0.550866	1.40149	1.29216	0.712229	1.04325	1.41541	1.64838	0.976851	0.55019
Phosphoenolpyruvic acid	23620	115386	25132	7767	62438	402662	382505	219381	152743		46868.6		Phosphoenolpyruvic acid	0.503962	2.4619	0.536223	0.165719	1.33219	8.5913	8.16122	4.68077	3.25896
Dihydroxyacetone phosphate	20814	121512	29740	11467	76042	374704	351960	233482	158102		51915		Dihydroxyacetone phosphate	0.400925	2.3406	0.572859	0.22088	1.46474	7.21764	6.77954	4.49739	3.0454
aconitate	19796	108211	19143	6239	56486	341868	319103	202487	154141		41975		aconitate	0.471614	2.57799	0.456057	0.148636	1.34571	8.14456	7.60222	4.82399	3.67221
N-carbamoyl-L-aspartate	463835	206695	142464	29462	961889	32084926	25987708	25259760	17531120		360869		N-carbamoyl-L-aspartate	1.28533	0.57277	0.39478	0.0816418	2.66548	88.9102	72.0142	69.997	48.5803
glucose	276175	425766	352582	286189	476193	907947	851399	854518	529384		363381		glucose	0.760015	1.17168	0.970282	0.787573	1.31045	2.49861	2.34299	2.35158	1.45683
myo-inositol	282129	273753	224592	119549	331086	988818	651017	1234796	322829		246222		myo-inositol	1.14583	1.11181	0.912153	0.485534	1.34467	4.01596	2.64403	5.01497	1.31113
4-Pyridoxic acid	4097	4330	4956	6454	5729	2962	5809	2911	837		5113.2		4-Pyridoxic acid	0.801259	0.846828	0.969256	1.26222	1.12043	0.579285	1.13608	0.569311	0.163694
Indoleacrylic acid	120549	330509	294996	168259	251119	310574	375981	233847	133483		233086		Indoleacrylic acid	0.517186	1.41797	1.26561	0.721874	1.07736	1.33244	1.61305	1.00326	0.572676
lipoate	133305	303188	308727	140080	239477	345653	400104	232940	114204		224955		lipoate	0.592584	1.34777	1.37239	0.622701	1.06455	1.53654	1.77859	1.03549	0.507674
D-glucarate	8946	64846	15115	5358	38927	280675	246853	161797	109405		26638.4		D-glucarate	0.335831	2.43431	0.567414	0.201138	1.46131	10.5365	9.26681	6.07383	4.10704
deoxyribose-phosphate	237104	402258	310955	275032	459705	865965	814644	830432	497888		337011		deoxyribose-phosphate	0.70355	1.19361	0.922686	0.816093	1.36407	2.56955	2.41726	2.46411	1.47737
pantothenate	119577	317962	296831	156258	224185	330150	386021	220409	130418		222963		pantothenate	0.53631	1.42608	1.3313	0.700826	1.00548	1.48074	1.73133	0.988547	0.584932
prephenate	120248	320209	309559	158222	234795	335528	383836	219081	127879		228607		prephenate	0.526004	1.4007	1.35411	0.692115	1.02707	1.46771	1.67902	0.958332	0.559385
GPP	230039	384510	315224	247507	418372	796854	766314	774356	473007		319130		GPP	0.720831	1.20487	0.987759	0.775567	1.31098	2.49695	2.40126	2.42646	1.48217
FPP	114816	299815	272371	139051	217546	297108	360655	210279	22436		208720		FPP	0.550096	1.43645	1.30496	0.666209	1.04229	1.42348	1.72794	1.00747	0.107493
5-phosphoribosyl-1-pyrophosphate	10055	43468	9873	2848	28718	178407	169392	84552	61544		18992.4		5-phosphoribosyl-1-pyrophosphate	0.529422	2.2887	0.51984	0.149955	1.51208	9.3936	8.91894	4.45189	3.24045
GGPP	109582	284527	253958	131425	207316	281542	338581	197497	105843		197362		GGPP	0.555235	1.44165	1.28677	0.66591	1.05044	1.42653	1.71554	1.00069	0.53629
CDP-choline	526499	1712106	405257	265124	541088	232629	202828	150967	109561		690015		CDP-choline	0.763026	2.48126	0.587316	0.384229	0.784169	0.337136	0.293947	0.218788	0.158781
UDP-D-glucose	66579152	277584736	67175984	18570240	92161456	117364728	44030732	28327432	5841050		1.04414e+08		UDP-D-glucose	0.637644	2.65849	0.64336	0.177851	0.882652	1.12403	0.421692	0.271298	0.0559411
UDP-N-acetyl-glucosamine	23706136	46375644	15232886	6800257	14800779	2888333	2207500	2541732	853288		2.13831e+07		UDP-N-acetyl-glucosamine	1.10864	2.16879	0.712378	0.31802	0.692171	0.135075	0.103236	0.118866	0.0399047

## Sheet: Figure 5D
		ear tag #	762	763	764	765	766	772	773	776	777	778
			Vehicle-1	Vehicle-2	Vehicle-3	Vehicle-4	Vehicle-5	BQ-1	BQ-2	BQ-3	BQ-4	BQ-5
		H2-Db	0.448038	1.80009	0.665315	1.25781	0.828744	3.19691	1.47534	2.92779	2.03643	3.32329
		H2-Kb	0.455795	2.18609	0.843891	0.919687	0.594538	3.94058	1.7708	3.05846	0.860847	3.74393
		Nlrc5	0.365328	1.24647	2.03499	0.770675	0.582538	2.30042	4.54244	1.8411	0.4426	4.42047

## Sheet: Figure 5E
	Experimental group	Animal #	Days of survival after tumor implantation
	Vehicle (black)	1	19
		2	20
		3	20
		4	20
		5	20
		6	20
		7	20
		8	21
		9	21
		10	21
		11	21
		12	22
		13	22
		14	22
		15	22
	ICB (red)	16	20
		17	20
		18	20
		19	21
		20	21
		21	21
		22	22
		23	22
		24	22
		25	22
		26	23
		27	23
		28	23
		29	27
		30	27
	BQ (blue)	31	28
		32	28
		33	29
		34	29
		35	30
		36	30
		37	30
		38	30
	BQ + delayed ICB (brown)	39	29
		40	31
		41	31
		42	32
		43	33
		44	34
		45	34
	BQ + concurrent ICB	46	27
		47	27
		48	27
		49	28
		50	28
		51	28
		52	28
		53	29
		54	29
		55	29
		56	29
		57	29
		58	33
		59	34
