# Supplementary material for: DHODH inhibition enhances the efficacy of immune checkpoint blockade by increasing cancer cell antigen presentation
Source: eLife. 2024 Jul 8;12:RP87292. doi: 10.7554/eLife.87292 (PMC11230627; doi:10.7554/eLife.87292)
Supplement: Supplementary file 2. — For genes that were assayed by RT-qPCR, forward and reverse primer sequences are listed. ‘N/A’ indicates that primer sequence is not applicable because that gene was not assayed by RT-qPCR in this study. [file elife-87292-supp2.xlsx]

## Sheet: Genes, RT-qPCR primer sequences
	Mouse (Mus musculus)	Designation in this manuscript	Official symbol (Mouse Genome Informatics Database)	NCBI Gene ID	FW sequence (5' to 3')	RV sequence (5' to 3')
		Beta actin	Actb	11461	CGCTGTATTCCCCTCCATCG	CCAGTTGGTAACAATGCCATGT
		18S rRNA	Rn18s	19791	CTCAACACGGAAACCTCAC	CGCTCCACCACAAGAACG
		H2-Db	H2-D	83772	CAAGAGCAGTGGTTCCGAGTGAG	CTTGTAATGCTCTGCAGCACCACT
		H2-Kb	H2-K1	14972	GTGATCTCTGGCTGTGAAGT	GTCTCCACAAGCTCCATGTC
		B2m	B2m	12010	CCCCACTGAGACTGATACATACG	CGATCCCAGTAGACGGTCTTG
		Nlrc5	Nlrc5	434341	GCTGAGAGCATCCGACTGAAC	AGGTACATCAAGCTCGAAGCA
		Tap1	Tap1	21354	GGACTTGCCTTGTTCCGAGAG	GCTGCCACATAACTGATAGCGA
		Tap2	Tap2	21355	CTGGCGGACATGGCTTTACTT	CTCCCACTTTTAGCAGTCCCC
		Tapbp	Tapbp	21356	GGCCTGTCTAAGAAACCTGCC	CCACCTTGAAGTATAGCTTTGGG
		Erap1	Erap1	80898	TAATGGAGACTCATTCCCTTGGA	AAAGTCAGAGTGCTGAGGTTTG
		Dhodh	Dhodh	56749	N/A	N/A
	Human (Homo sapiens)	Designation in this manuscript	Official symbol (HUGO Gene Nomenclature Committee)	NCBI Gene ID	FW sequence (5' to 3')	RV sequence (5' to 3')
		18S rRNA	RNA18S1	106632259	GCTTAATTTGACTCAACACGGGA	AGCTATCAATCTGTCAATCCTGTC
		Beta actin	ACTB	60	GTCCACCGCAAATGCTTCTA	TGCTGTCACCTTCACCGTTC
		HLA-A	HLA-A	3105	ACCCTCGTCCTGCTACTCTC	CTGTCTCCTCGTCCCAATACT
		HLA-B	HLA-B	3106	CAGTTCGTGAGGTTCGACAG	CAGCCGTACATGCTCTGGA
		HLA-C	HLA-C	3107	GGACAAGAGCAGAGATACACG	CAAGGACAGCTAGGACAACC
		B2M	B2M	567	GAGGCTATCCAGCGTACTCCA	CGGCAGGCATACTCATCTTTT
		TAP1	TAP1	6890	TCCTGGTGGTCCTCTCCTCTCTT	GTGTTGTTATAGATCCCGTCACCC
		TAP2	TAP2	6891	TCTTGCGAAGCCTGGTGAAAGTG	ACTTCCTGATGGCGGGTGTTGT
		TAPBP	TAPBP	6892	ACCCTGGAGGTAGCAGGTCTTT	AATCCTTGCAGGTGGACAGGTAG
		STAT1	STAT1	6772	CAGCTTGACTCAAAATTCCTGGA	TGAAGATTACGCTTGCTTTTCCT
		CCL5	CCL5	6352	CCAGCAGTCGTCTTTGTCAC	CTCTGGGTTGGCACACACTT
		NLRC5	NLRC5	84166	CTGGCCAGTCTCACCGCACAA	CCAGGGGACAGCCATCAAAATC
		DHODH	DHODH	1723	N/A	N/A
		CDK9	CDK9	1025	N/A	N/A
		HLA-E	HLA-E	3133	N/A	N/A
		HLA-F	HLA-F	3134	N/A	N/A
		HLA-DMA	HLA-DMA	3108	N/A	N/A
		HLA-DMB	HLA-DMB	3109	N/A	N/A
		HLA-DPA1	HLA-DPA1	3113	N/A	N/A
		HLA-DPB1	HLA-DPB1	3115	N/A	N/A
		HLA-DQA2	HLA-DQA2	3118	N/A	N/A
		HLA-DRA	HLA-DRA	3122	N/A	N/A
		HLA-DRB1	HLA-DRB1	3123	N/A	N/A
		HLA-DRB5	HLA-DRB5	3127	N/A	N/A
		CD74	CD74	972	N/A	N/A
		ERAP1	ERAP1	51752	N/A	N/A
		PSMB8	PSMB8	5696	N/A	N/A
		PSMB9	PSMB9	5698	N/A	N/A
		PSMB10	PSMB10	5699	N/A	N/A
		CIITA	CIITA	4261	N/A	N/A
